# Supplementary material for: Aminooxy Click Chemistry as a Tool for Bis-homo and Bis-hetero Ligand Conjugation to Nucleic Acids
Source: PubMed Central journal article supplement — Org Lett. 2022 Jun 17;24(25):4496–501. doi: 10.1021/acs.orglett.2c00988 (PMC9251770; doi:10.1021/acs.orglett.2c00988), 2022-06-17
Supplement: ol2c00988_si_001.pdf [file ol2c00988_si_001.pdf]

# **Aminoxy click chemistry (AOCC) as a tool for bis-homo and bis-hetero ligand conjugation to nucleic acids**

Dhrubajyoti Datta, Shohei Mori, Mimouna Madaoui, Kelly Wassarman, Ivan Zlatev, Muthiah Manoharan\*

*Alnylam Pharmaceuticals, 675 West Kendall Street, Cambridge, Massachusetts 02142, USA*

## *Supporting Information*

### **Table of Contents**

|                                                                      |              |
|----------------------------------------------------------------------|--------------|
| Table for carbonyl compounds and acids used for AOCC building blocks | <b>S-1</b>   |
| Experimental Section: General conditions                             | <b>S-2</b>   |
| Synthesis schemes                                                    | <b>S-3</b>   |
| Synthesis and characterization of building blocks for AOCC           | <b>S-4</b>   |
| Oligonucleotide synthesis, purification, and characterization        | <b>S-36</b>  |
| NMR spectra for the new compounds                                    | <b>S-39</b>  |
| HPLC and characterization of AOCC-modified oligonucleotides          | <b>S-107</b> |
| References                                                           | <b>S-113</b> |

**Table S1:** Carbonyl compounds and acids used for AOCC modifications

| Reagents used as ligands for AOCC                                                                                  |                                                                                                                   | AOCC Conjugates          |                       |
|--------------------------------------------------------------------------------------------------------------------|-------------------------------------------------------------------------------------------------------------------|--------------------------|-----------------------|
| R <sub>1</sub> carbonyls                                                                                           | R <sub>2</sub> carbonyls / acids                                                                                  | bis-homo                 | bis-hetero            |
| 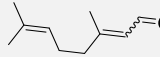<br>Citral                        |                                                                                                                   | <b>5a, 6a, 7a</b>        |                       |
| <br>Decanal                       |                                                                                                                   | <b>5b, 6b, 7b</b>        |                       |
| <br>Hexadecanal                   |                                                                                                                   | <b>5c, 6c, 7c, 12-15</b> |                       |
| <br>Hexadecanal                   | Formaldehyde (HCHO)                                                                                               |                          | <b>16a, 17a, 18a</b>  |
| <br>dilinoleyl aldehyde           | Formaldehyde (HCHO)                                                                                               |                          | <b>16b, 17b, 18b</b>  |
| <br>cyclopropyl-dilinoleyl ketone | Formaldehyde (HCHO)                                                                                               |                          | <b>16c, 17c, 18c</b>  |
| <br>Hexadecanal                   | <br>Methyl-16-oxohexadecanoate   |                          | <b>16d, 17d, 18d</b>  |
| <br>TriGalNAc-aldehyde          | <br>Hexadecanal                |                          | <b>16e, 17e, 18e</b>  |
| <br>Hexanal                     | <br>Methyl-16-oxohexadecanoate |                          | <b>26, 28, 30, 32</b> |
| <br>Tetrahydro-4H-pyran-4-one   | <br>Hexadecanal                |                          | <b>27, 29, 31, 33</b> |
| <br>Hexadecanal                 | <br>Folic acid                 |                          | <b>20, 22, 24</b>     |
| <br>Hexadecanal                 | <br>Lipoic acid                |                          | <b>21, 23, 25</b>     |

## **EXPERIMENTAL SECTION**

**General conditions:** TLC was performed on Merck silica gel 60 plates coated with F254. Compounds were visualized under UV light (254 nm) or after spraying with the p-anisaldehyde staining solution followed by heating. Flash column chromatography was performed using a Teledyne ISCO Combi Flash system with pre-packed RediSep Teledyne ISCO silica gel cartridges. All moisture-sensitive reactions were carried out under anhydrous conditions using dry glassware, anhydrous solvents, and argon atmosphere. All commercially available reagents and solvents were purchased from Sigma-Aldrich unless otherwise stated and were used as received. ESI-MS spectra were recorded on a Waters QToF Premier instrument using the direct flow injection mode.  $^1\text{H}$  NMR spectra were recorded at 400, 500, and 600 MHz.  $^{13}\text{C}$  NMR spectra were recorded at 101, 126 and 151 MHz.  $^{31}\text{P}$  NMR spectra were recorded at 162, 202 and 243 MHz.  $^{19}\text{F}$  NMR spectra were recorded at 565 MHz. Chemical shifts are given in ppm referenced to the solvent residual peak (DMSO- $d_6$  –  $^1\text{H}$ :  $\delta$  at 2.50 ppm and  $^{13}\text{C}$   $\delta$  at 39.5 ppm;  $\text{CDCl}_3$  –  $^1\text{H}$ :  $\delta$  at 7.26 ppm and  $^{13}\text{C}$   $\delta$  at 77.16 ppm;  $\text{CD}_3\text{CN}$  –  $^1\text{H}$ :  $\delta$  at 1.94 ppm and  $^{13}\text{C}$   $\delta$  at 1.32 ppm)<sup>1</sup>. Coupling constants are given in Hertz. Signal splitting patterns are described as singlet (s), doublet (d), triplet (t), septet (sept), broad signal (brs), or multiplet (m).

## Synthesis of building blocks:

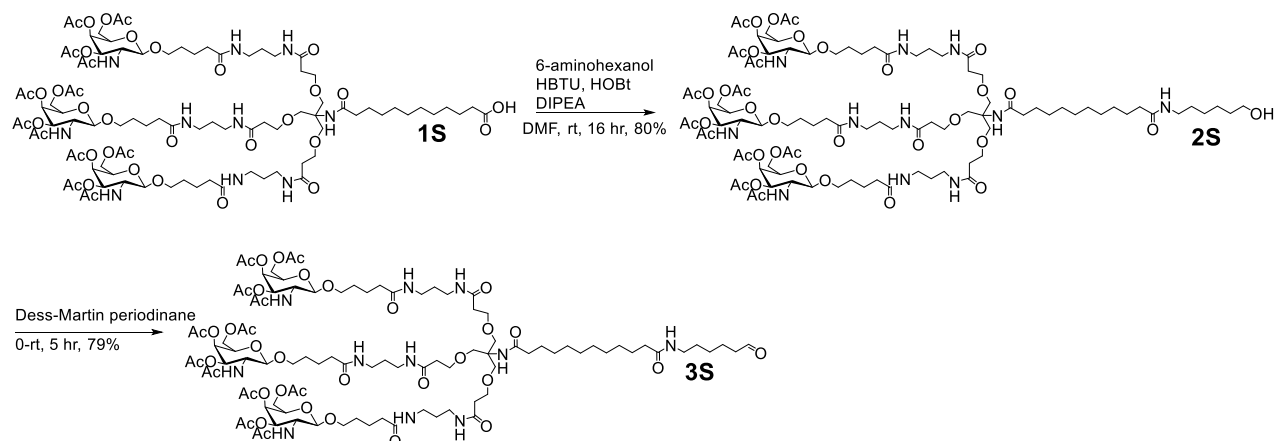

**Scheme S1:** Synthesis of TriGalNAc aldehyde (**3S**) from TriGalNAc acid.

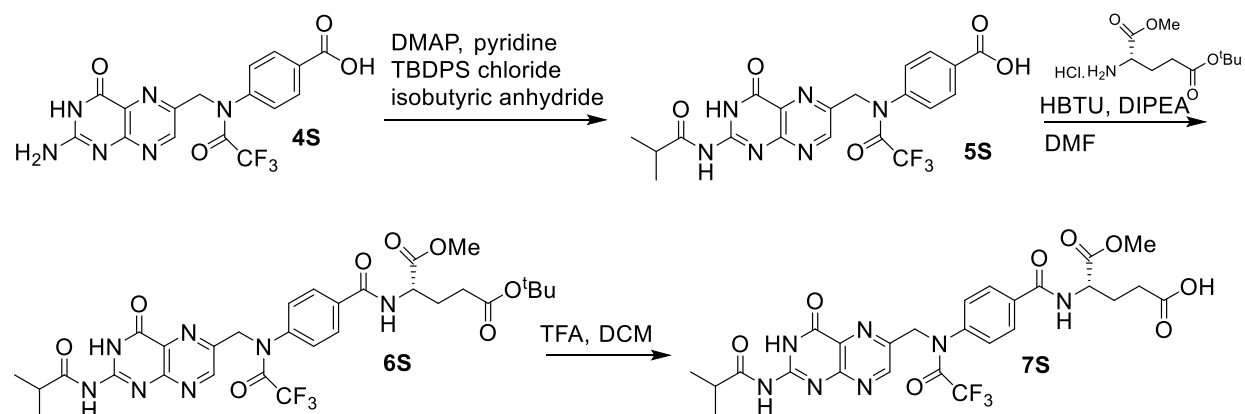

**Scheme S2:** Synthesis of partially protected Folic acid **7S**<sup>2</sup>.

## Synthesis and characterization of building blocks for AOCC

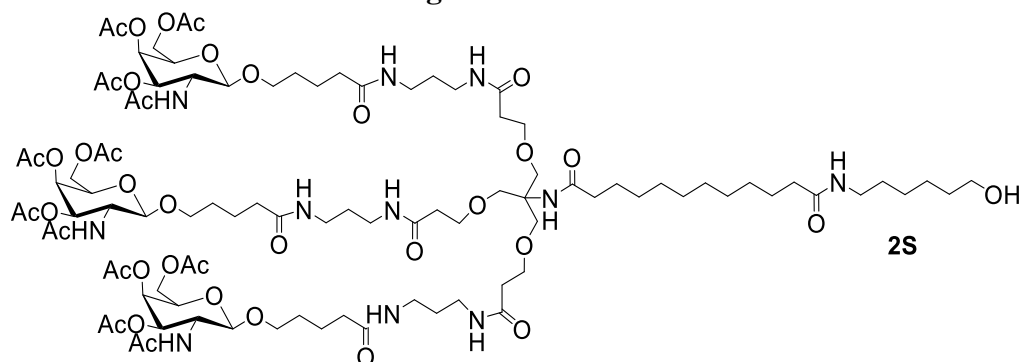

**[(3R,6R)-5-acetamido-6-[5-[3-[3-[3-[3-[3-[5-[(2R,5R)-3-acetamido-4,5-diacetoxy-6-(acetoxymethyl)tetrahydropyran-2-yl]oxypentanoylamino]propylamino]-3-oxo-propoxy]-2-[[3-[3-[5-[(2R,5R)-3-acetamido-4,5-diacetoxy-6-(acetoxymethyl)tetrahydropyran-2-yl]oxypentanoylamino]propylamino]-3-oxo-propoxy]methyl]-2-[[12-(6-hydroxyhexylamino)-12-oxo-dodecanoyl]amino]propoxy]propanoylamino]propylamino]-5-oxo-pentoxy]-3,4-diacetoxy-tetrahydropyran-2-yl]methyl acetate (2S):** To a clear solution of TriGalNAc acid **1S**<sup>3</sup> (8.3 g, 4.14 mmol) in dry dimethylformamide (30 mL) was added HBTU (1.88 g, 4.96 mmol), HOBT (670.82 mg, 4.96 mmol) and DIPEA (1.60 g, 12.41 mmol, 2.16 mL) in single portions. Reaction mixture was stirred for 5 minutes and then was added 6-amino-hexan-1-ol (969.67 mg, 8.27 mmol) slowly. Resulting mixture was stirred at 22 °C for 16 hr and then all volatile matter was removed under high vacuum pump. Residue was diluted with DCM (70 mL) and washed with NH<sub>4</sub>Cl solution (3 x 30 mL), NaHCO<sub>3</sub> solution (3 x 40 mL), water (50 mL) and brine (2 x 50 mL). Organic layer was separated, dried over anhydrous Na<sub>2</sub>SO<sub>4</sub>, filtered and the filtrate was evaporated to dryness. Solid residue thus obtained, was again evaporated with DCM (20 mL) and kept for drying overnight at 22 °C to afford **2S** (6.97 g, 80% yield) as yellow solid. <sup>1</sup>H NMR (600 MHz, DMSO-*d*<sub>6</sub>) δ 7.88 – 7.82 (m, 6H), 7.74 (dt, *J* = 17.0, 5.7 Hz, 4H), 7.01 (s, 1H), 5.21 (d, *J* = 3.4 Hz, 3H), 4.96 (dd, *J* = 11.3, 3.4 Hz, 3H), 4.47 (d, *J* = 8.5 Hz, 3H), 4.03 – 4.00 (m, 8H), 3.87 (dt, *J* = 11.2, 8.9 Hz, 3H), 3.70 (dt, *J* = 9.8, 5.8 Hz, 3H), 3.53 (dd, *J* = 12.5, 6.2 Hz, 13H), 3.43 – 3.37 (m, 2H), 3.01 (dt, *J* = 14.9, 7.4 Hz, 14H), 2.27 (t, *J* = 6.4 Hz, 6H), 2.10 (s, 8H), 2.03 (q, *J* = 6.9 Hz, 9H), 1.99 (s, 10H), 1.89 (s, 8H), 1.77 (s, 9H), 1.52 – 1.32 (m, 30H), 1.21 (s, 12H) ppm. <sup>13</sup>C NMR (151 MHz, DMSO-*d*<sub>6</sub>) δ 172.5, 172.0, 171.9, 170.1, 170.1, 170.0, 169.7, 169.4, 162.4, 101.0, 70.5, 69.8, 68.7, 68.2, 67.3, 66.7, 61.5, 60.7, 59.5, 49.3, 38.4, 38.3, 36.4, 36.3, 36.0, 35.8, 35.5, 35.1, 32.5, 30.8, 29.4, 29.3, 29.0, 28.9, 28.8, 28.7, 28.7, 28.6, 26.4, 25.4, 25.4, 25.3, 22.8, 21.9, 20.6, 20.5, 20.5 ppm. MALDI mass calcd. for C<sub>97</sub>H<sub>161</sub>N<sub>11</sub>O<sub>39</sub>Na [M + Na]<sup>+</sup> 2128.38, found 2130.96.

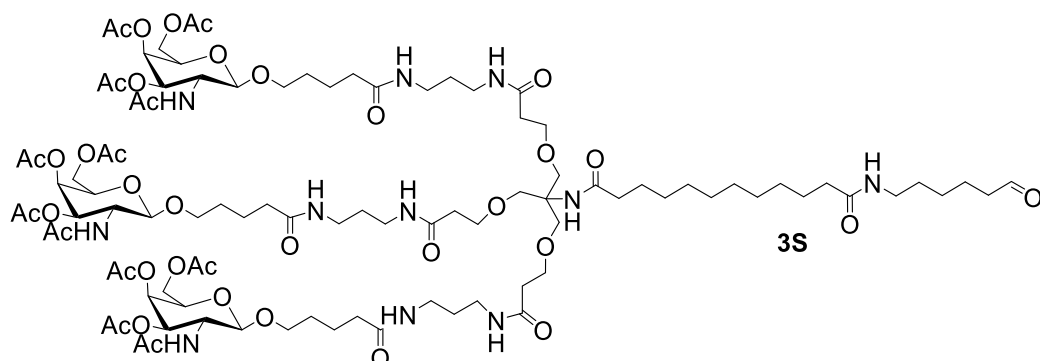

**[(3R,6R)-5-acetamido-6-[5-[3-[3-[3-[3-[3-[5-[(2R,5R)-3-acetamido-4,5-diacetoxy-6-(acetoxymethyl)tetrahydropyran-2-yl]oxypentanoylamino]propylamino]-3-oxo-propoxy]-2-[[3-[3-[5-[(2R,5R)-3-acetamido-4,5-diacetoxy-6-(acetoxymethyl)tetrahydropyran-2-yl]oxypentanoyl amino]propylamino]-3-oxo-propoxy]methyl]-2-[[12-oxo-12-(6-oxohexylamino)dodecanoyl]**

**amino]propoxy]propanoylamino]propylamino]-5-oxo-pentoxo]-3,4-diacetoxy-tetrahydropyran-2-yl)methyl acetate (3S):** To a solution of **2S** (1.0 g, 474.98  $\mu\text{mol}$ ) in dry DCM (50 mL) at 0 °C, Dess-Martin periodinane (302.19 mg, 712.47  $\mu\text{mol}$ ) was added slowly and then stirred for 5 hr maintaining 0 °C. Reaction mixture was diluted with DCM (30 mL) and washed with 10%  $\text{NaHCO}_3$  solution (50 mL) followed by 10%  $\text{Na}_2\text{S}_2\text{O}_3$  solution (2 x 30 mL). Organic layer was separated, dried over anhydrous  $\text{Na}_2\text{SO}_4$ , filtered and the filtrate was evaporated to dryness to afford **3S** (0.79 g, 79% yield) as white foam.  $^1\text{H}$  NMR (600 MHz,  $\text{DMSO}-d_6$ )  $\delta$  9.65 (q,  $J = 2.0$  Hz, 1H), 7.88 – 7.81 (m, 6H), 7.75 (dt,  $J = 11.4, 5.7$  Hz, 4H), 7.01 (s, 1H), 5.21 (d,  $J = 3.4$  Hz, 3H), 4.96 (dd,  $J = 11.3, 3.4$  Hz, 3H), 4.47 (d,  $J = 8.5$  Hz, 3H), 4.03 – 4.00 (m, 8H), 3.87 (dt,  $J = 11.2, 8.9$  Hz, 3H), 3.70 (dt,  $J = 9.6, 5.8$  Hz, 3H), 3.53 (dd,  $J = 12.5, 6.2$  Hz, 14H), 3.40 (dt,  $J = 9.8, 6.3$  Hz, 3H), 3.01 (dp,  $J = 13.1, 6.8$  Hz, 15H), 2.40 (td,  $J = 7.3, 1.7$  Hz, 2H), 2.27 (t,  $J = 6.4$  Hz, 7H), 2.10 (s, 8H), 2.04 (t,  $J = 7.3$  Hz, 8H), 1.99 (s, 9H), 1.89 (s, 9H), 1.77 (s, 9H), 1.54 – 1.40 (m, 21H), 1.21 (s, 15H) ppm.  $^{13}\text{C}$  NMR (151 MHz,  $\text{DMSO}-d_6$ )  $\delta$  203.5, 172.5, 172.0, 170.1, 170.1, 170.0, 169.7, 169.4, 101.0, 70.5, 69.8, 68.7, 68.2, 67.4, 66.7, 61.5, 59.5, 55.0, 49.4, 43.0, 38.3, 38.2, 36.4, 36.3, 36.0, 35.9, 35.8, 35.5, 35.1, 29.4, 29.0, 28.9, 28.8, 28.7, 28.7, 28.6, 26.0, 25.4, 25.4, 22.8, 21.9, 21.3, 20.6, 20.5, 20.5 ppm. MALDI mass calcd. for  $\text{C}_{97}\text{H}_{159}\text{N}_{11}\text{O}_{39}\text{Na}$   $[\text{M} + \text{Na}]^+$  2126.37, found 2128.87.

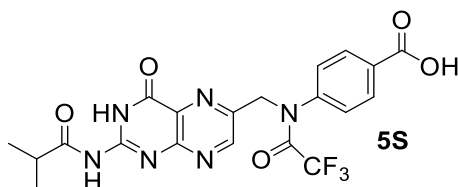

**4-(2,2,2-trifluoro-N-((2-isobutyramido-4-oxo-3,4-dihydropteridin-6-yl)methyl)acetamido) benzoic acid (5S):** To a suspension of commercially available compound **4S**<sup>4</sup> (25 g, 61.2 mmol) and DMAP (11.25 g, 92 mmol) in anhydrous pyridine (400 mL), TBDPS chloride (42 g, 153 mmol) was added. The reaction mixture was stirred at room temperature for 30 hr after which isobutyric anhydride (14.6 g, 92 mmol) was added and the mixture was slightly warmed. An additional 60 mL of pyridine was also added, and the reaction mixture was stirred at room temperature overnight. The reaction mixture became homogenous after which pyridine and other volatiles were concentrated in a rotary evaporator. The residue was stirred with EtOAc (1 L) and acetic acid (100 mL) and water (500 mL) for 24 hr. The thus obtained slurry was filtered, the residue was washed with water (500 mL), EtOAc (1 L) and dried to obtain the pure product **5S** as a white solid (26.1 g, 89%).  $^1\text{H}$  NMR ( $\text{DMSO}-d_6$ , 400 MHz)  $\delta$  = 8.87 (s, 1H), 7.95 (d,  $J=8.6$  Hz, 2H), 7.67 (d,  $J=8.6$  Hz, 2H), 5.21 (s, 2H), 2.79-2.74 (m, 1H), 1.12 (d,  $J=6.83$  Hz, 6H),  $^{13}\text{C}$  NMR ( $\text{DMSO}-d_6$ )  $\delta$  = 180.7, 166.5, 159.3, 149.9, 147.7, 142.7, 136.3, 134.5, 130.5, 129.2, 128.9, 127.5, 35.0, 33.1, 26.5, 18.9, 18.7.  $^{19}\text{F}$  NMR ( $\text{DMSO}-d_6$ )  $\delta$  = -64.32.

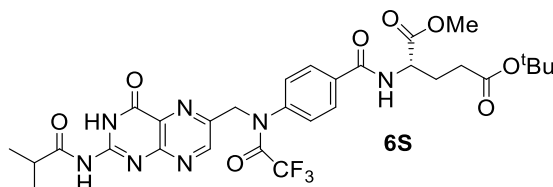

**5-(tert-butyl) 1-methyl (4-(2,2,2-trifluoro-N-((2-isobutyramido-4-oxo-3,4-dihydropteridin-6-yl)methyl)acetamido)benzoyl)-L-glutamate (6S):** Compound **5S** (2.4 g, 5 mmol) was dissolved in anhydrous DMF (20 mL), HBTU (1.9 g, 1 eq.) followed by DIEA (1 mL, 5 eq.) were added and stirred for 20 minutes. To this reaction mixture the 5-(tert-butyl)-1-methyl-L-glutamate hydrochloride (1.2 g, 1 eq) was added as a solution in DMF (6 mL). Reaction was monitored by TLC (8% MeOH/DCM, PMA stain). TLC of the reaction mixture showed completion of the reaction. The reaction mixture was slowly poured in ice with vigorous stirring. The precipitated product was filtered to get the product **6S** as a white solid (Yield=2.85 g, 86%).  $^1\text{H}$  NMR ( $\text{DMSO}-d_6$ , 400 MHz)  $\delta$  = 12.33 (s, 1H), 11.94 (s, 1H), 8.88 (s, 1H), 8.82 (d,  $J=7.3$  Hz, 1H), 7.90 (d,  $J=8.6$  Hz, 2H), 7.68 (d,  $J=8.4$  Hz, 2H), 5.22 (s, 2H), 4.46-

4.40 (m, 1H), 3.62 (s, 3H), 2.86-2.73 (m, 1H), 2.32 (t,  $J=7.4$  Hz, 2H) 2.05-1.90 (m, 2H), 1.35 (m, 9H), 1.12 (d,  $J=6.8$  Hz, 6H).  $^{13}\text{C}$  NMR DMSO- $d_6$ )  $\delta$  = 180.8, 172.1, 171.5, 165.6, 159.1, 154.8, 150.0, 149.8, 147.7, 141.6, 134.2, 130.5, 128.7, 128.5, 117.5, 114.6, 79.8, 52.0, 51.9, 35.0, 31.2, 27.7, 25.7, 18.7 ppm.

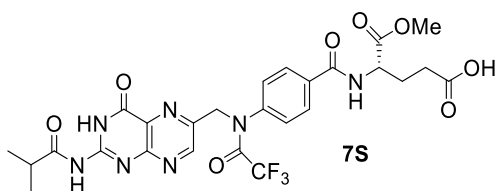

**(S)-5-methoxy-5-oxo-4-(4-(2,2,2-trifluoro-N-((2-isobutyramido-4-oxo-3,4-dihydropteridin-6-yl)methyl)acetamido)benzamido)pentanoic acid (7S)**<sup>5</sup>: Compound **6S** (2 g, 2.9 mmol) was dissolved in 20mL of 50% TFA in DCM and the solution was stirred at room temperature for 30 min. after which the TLC showed the complete disappearance of the starting ester. The reaction mixture was concentrated, and the residue was crystallized from DCM : hexanes (2:3) and crystallized product was filtered off and dried to obtain the pure product **7S** (1.76 g, 96%) as off-white powder.  $^1\text{H}$  NMR (600 MHz, DMSO- $d_6$ )  $\delta$  12.36 (s, 1H), 11.97 (s, 1H), 8.91 (s, 1H), 8.88 (d,  $J = 7.3$  Hz, 1H), 7.93 (d,  $J = 8.3$  Hz, 2H), 7.71 (d,  $J = 8.2$  Hz, 2H), 5.24 (s, 2H), 4.46 (ddd,  $J = 9.8, 7.3, 5.1$  Hz, 1H), 3.65 (s, 3H), 2.84 – 2.72 (m, 1H), 2.37 (t,  $J = 7.4$  Hz, 2H), 2.13 – 2.04 (m, 1H), 2.01 – 1.90 (m, 1H), 1.14 (d,  $J = 6.9$  Hz, 6H) ppm.  $^{13}\text{C}$  NMR (151 MHz, DMSO- $d_6$ )  $\delta$  180.8, 173.8, 172.2, 165.8, 159.2, 156.1, 155.9, 155.6, 155.4, 154.8, 150.0, 149.9, 147.8, 141.8, 134.2, 130.6, 128.8, 128.5, 119.0, 117.1, 115.2, 113.2, 54.0, 52.1, 52.0, 35.0, 30.2, 25.7, 18.8 ppm.  $^{19}\text{F}$  NMR (565 MHz, DMSO- $d_6$ )  $\delta$  -66.06 ppm.

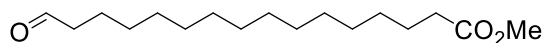

**Methyl-16-oxohexadecanoate**

**Methyl-16-oxohexadecanoate**<sup>6,7</sup> was synthesized following the literature procedure.

To a clear solution of commercially available oxacyclohexadecan-2-one (1.03 g, 4.16 mmol) in methanol (10 mL) was added hydrogen chloride (151.68 mg, 4.16 mmol, 189.59  $\mu\text{L}$ ) dropwise at 22  $^\circ\text{C}$  and stirred for 12 hr. All the volatile matters were evaporated, and the residue was crystallized from chilled diethylether (30 mL) to afford methyl-16-hydroxyhexadecanoate<sup>8</sup> (1.1 g, 3.84 mmol, 92% yield) as white solid which was used for next steps without further purification.  $^1\text{H}$  NMR (400 MHz,  $\text{CDCl}_3$ )  $\delta$  3.64 (s, 3H), 3.61 (t,  $J = 6.6$  Hz, 2H), 2.28 (t,  $J = 7.6$  Hz, 2H), 1.99 (s, 1H), 1.65 – 1.49 (m, 3H), 1.24 (d,  $J = 9.6$  Hz, 23H) ppm.  $^{13}\text{C}$  NMR (101 MHz,  $\text{CDCl}_3$ )  $\delta$  174.5, 63.1, 51.5, 34.2, 32.9, 29.7, 29.7, 29.7, 29.5, 29.4, 29.3, 29.2, 25.9, 25.0 ppm.

Dess-Martin Periodinane (2.02 g, 4.77 mmol) was dissolved in 20 mL of DCM and cooled to 0  $^\circ\text{C}$  in an ice bath. A solution of methyl-16-hydroxyhexadecanoate (0.91 g, 3.18 mmol) in 20 mL of DCM was added via a syringe to the mixture and the ice bath was removed. After stirring for 1 hr at room temperature the reaction was quenched with a solution of  $\text{NaHCO}_3$  (15 mL) and sodium thiosulfate (15 mL) and stirred for 5 min. After separation, the organic phase was washed with water (30 mL), brine (30 mL) successively and then dried over anhydrous  $\text{Na}_2\text{SO}_4$ . The solvent was removed, and the crude product was purified by column chromatography (gradient: 0-10% EtOAc in hexane) to yield **methyl-16-oxohexadecanoate** (0.77 g, 85% yield) as a white solid. Compound was stored at -20  $^\circ\text{C}$ .  $^1\text{H}$  NMR (500 MHz,  $\text{CDCl}_3$ )  $\delta$  9.74 (t,  $J = 1.9$  Hz, 1H), 3.64 (s, 3H), 2.40 (td,  $J = 7.3, 1.9$  Hz, 2H), 2.28 (t,  $J = 7.6$  Hz, 2H), 1.60 (pd,  $J = 7.2, 5.1$  Hz, 4H), 1.36 – 1.11 (m, 20H) ppm.  $^{13}\text{C}$  NMR (101 MHz,  $\text{CDCl}_3$ )  $\delta$  203.3, 174.7, 51.8, 44.3, 34.5, 30.0, 30.0, 29.9, 29.8, 29.8, 29.7, 29.6, 29.6, 25.4, 22.5 ppm.

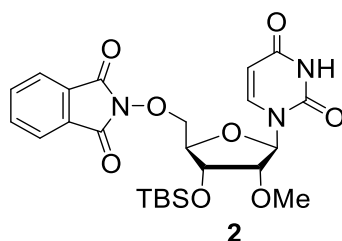

**2-[[2R,5R)-3-[tert-butyl(dimethyl)silyl]oxy-5-(2,4-dioxypyrimidin-1-yl)-4-methoxy-tetrahydrofuran-2-yl]methoxy]isoindoline-1,3-dione (2)**<sup>9</sup>: To a solution of **1**<sup>10</sup> (5 g, 13.42 mmol) in dimethylformamide (DMF) (60 mL) was added triphenylphosphine (4.82 g, 17.45 mmol) and N-hydroxyphthalimide (2.93 g, 17.45 mmol). To this resulting mixture, diethyl azodicarboxylate (DEAD) (3.20 g, 17.45 mmol, 3.35 mL) was added dropwise at 0 °C. The reaction mixture was stirred at 22 °C for 4 hr. The reaction mixture was then quenched with 10% aqueous NaHCO<sub>3</sub> (50 mL) and extracted with EtOAc (3 x 50 mL). Combined organic layer was dried over anhydrous Na<sub>2</sub>SO<sub>4</sub>, filtered and the filtrate was evaporated to dryness. The crude residue thus obtained was purified by flash chromatography (gradient: 0-40% EtOAc in hexane) to afford **2** (5.8 g, 83% yield) as white solid. <sup>1</sup>H NMR (400 MHz, CDCl<sub>3</sub>) δ 9.92 (s, 1H), 8.09 (d, *J* = 8.1 Hz, 1H), 7.89 – 7.80 (m, 2H), 7.80 – 7.72 (m, 2H), 5.91 (d, *J* = 2.9 Hz, 1H), 5.77 (dd, *J* = 8.1, 2.1 Hz, 1H), 4.56 (dd, *J* = 10.4, 2.7 Hz, 1H), 4.50 – 4.41 (m, 2H), 4.23 (dt, *J* = 6.8, 2.4 Hz, 1H), 3.76 (dd, *J* = 4.9, 2.9 Hz, 1H), 3.53 (s, 3H), 0.90 (s, 9H), 0.14 (d, *J* = 8.3 Hz, 6H) ppm. <sup>13</sup>C NMR (101 MHz, CDCl<sub>3</sub>) δ 163.9, 163.1, 150.6, 140.5, 134.8, 128.8, 123.8, 102.5, 88.4, 83.5, 81.9, 75.9, 69.2, 69.2, 58.5, 25.7, 18.2, -4.7, -4.9 ppm. HRMS calcd. for C<sub>24</sub>H<sub>32</sub>N<sub>3</sub>O<sub>8</sub>Si [M + H]<sup>+</sup> 518.1959, found 518.1978.

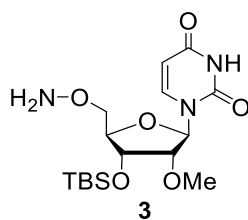

**1-((2R,3R,4R,5R)-5-((aminooxy)methyl)-4-((tert-butyl dimethylsilyl)oxy)-3-methoxytetrahydrofuran-2-yl)pyrimidine-2,4-dione (3)**: To a solution of compound **2**<sup>9</sup> (2.0 g, 3.86 mmol) in DCM (25 mL) was added N-methylhydrazine (0.21 g, 4.64 mmol, 0.24 mL) at 0°C for 1 hr with stirring. TLC was checked which confirmed consumption of starting material. All the volatile matters were evaporated to dryness and the crude compound thus obtained was purified by column chromatography (gradient: 0-5% MeOH in DCM) to afford **3** (1.4 g, 94% yield) as white solid. <sup>1</sup>H NMR (400 MHz, DMSO-*d*<sub>6</sub>) δ 11.37 (brs, 1 H), 7.70 (d, *J* = 8.0 Hz, 1 H), 6.20 (brs, 1 H), 5.79 (d, *J* = 4.8 Hz, 1 H), 5.65 (d, *J* = 4.8 Hz, 1 H), 4.25 (dd, *J* = 4.8, 4.4 Hz, 1 H), 3.96 (dd, *J* = 8.4, 4.8 Hz, 1 H), 3.83 (dd, *J* = 5.2, 4.8 Hz, 1 H), 3.78 – 3.65 (m, 2 H), 3.32 (s, 3 H). <sup>13</sup>C NMR (101 MHz, DMSO-*d*<sub>6</sub>) δ 163.0, 150.4, 140.5, 102.1, 86.6, 82.4, 81.6, 74.5, 70.2, 57.5, 25.6, 25.5, 17.7, -4.9, -5.0. HRMS calcd. for C<sub>16</sub>H<sub>30</sub>N<sub>3</sub>O<sub>6</sub>Si [M + H]<sup>+</sup> 388.1904, found 388.1909.

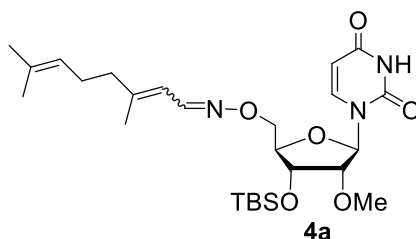

**1-((2R,5R)-4-[tert-butyl(dimethyl)silyl]oxy-5-[[[(2E)-3,7-dimethylocta-2,6-dienylidene]amino]oxymethyl]-3-methoxy-tetrahydrofuran-2-yl)pyrimidine-2,4-dione (4a)**: To a solution of **3** (0.6 g,



1.55 mmol) in dry DCM (20 mL), DIPEA (606.40 mg, 4.65 mmol, 817.25  $\mu$ L) was added and stirred for 5 minutes. To the resulting solution, citral (294.64 mg, 1.86 mmol, 331.80  $\mu$ L) was added in single portion and the reaction mixture was stirred for 16 hr at 25  $^{\circ}$ C. TLC showed consumption of starting material. All the volatile matters were removed, diluted with EtOAc (30 mL) and washed with water (30 mL) and brine (2 x 30 mL). Organic layer was separated, dried over anhydrous  $\text{Na}_2\text{SO}_4$ , filtered and the filtrate was evaporated to dryness. The residue thus obtained was purified flash column chromatography to afford **4a** (0.62 g, 77% yield).  $^1\text{H}$  NMR (400 MHz,  $\text{CDCl}_3$ )  $\delta$  10.11 (s, 1H), 7.97 (dd,  $J = 12.6, 10.4$  Hz, 1H), 7.83 – 7.71 (m, 1H), 7.33 – 7.29 (m, 0H), 6.30 (ddt,  $J = 9.2, 6.7, 1.5$  Hz, 1H), 5.91 – 5.82 (m, 2H), 5.64 (dd,  $J = 8.2, 4.5$  Hz, 1H), 5.56 (dd,  $J = 8.1, 7.1$  Hz, 1H), 5.04 (dtdq,  $J = 6.9, 4.1, 2.8, 1.4$  Hz, 1H), 4.57 – 4.39 (m, 1H), 4.33 – 4.12 (m, 4H), 3.62 (ddd,  $J = 15.5, 4.3, 2.0$  Hz, 1H), 3.56 – 3.50 (m, 3H), 2.34 – 2.03 (m, 4H), 1.89 – 1.75 (m, 3H), 1.69 – 1.60 (m, 4H), 1.57 (dd,  $J = 3.8, 1.5$  Hz, 4H), 0.88 (s, 9H), 0.07 (d,  $J = 1.6$  Hz, 7H) ppm.  $^{13}\text{C}$  NMR (101 MHz,  $\text{CDCl}_3$ )  $\delta$  164.0, 164.0, 163.9, 163.9, 151.8, 151.6, 150.4, 150.4, 149.0, 148.9, 148.3, 148.1, 145.3, 145.0, 140.1, 140.1, 139.9, 139.8, 133.0, 132.9, 132.6, 132.4, 123.2, 123.0, 122.9, 122.8, 118.3, 117.3, 113.8, 112.9, 101.9, 101.9, 101.8, 88.6, 88.6, 88.1, 88.1, 84.0, 84.0, 83.8, 82.7, 82.6, 82.6, 77.5, 77.2, 76.8, 71.6, 71.5, 71.5, 69.5, 69.5, 69.4, 69.3, 58.5, 40.5, 40.1, 32.9, 32.7, 26.9, 26.8, 26.2, 26.1, 25.8, 25.7, 25.7, 24.7, 24.4, 18.2, 18.2, 17.8, 17.8, 17.4, 17.2, -4.6, -4.7, -4.8, -4.8, -4.8 ppm. HRMS calcd. for  $\text{C}_{26}\text{H}_{44}\text{N}_3\text{O}_6\text{Si}$  [ $\text{M} + \text{H}$ ] $^+$  522.2999, found 522. 2994.

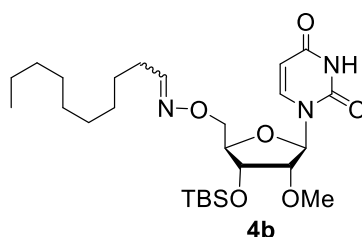

**1-[(2R,5R)-4-[tert-butyl(dimethyl)silyl]oxy-5-[(decylideneamino)oxymethyl]-3-methoxy-tetrahydrofuran-2-yl]pyrimidine-2,4-dione (4b):** To a solution of **3** (0.2 g, 0.52 mmol) in dry DCM (20 mL), DIPEA (0.27 mL, 1.55 mmol) was added and stirred for 5 minutes. To the resulting solution, decanal (0.16 g, 1.03 mmol) was added in single portion and the reaction mixture was stirred for 16 hr at 25  $^{\circ}$ C. All the volatile matters were removed when TLC showed consumption of starting material. Residue was diluted with EtOAc (30 mL) and washed with DI water (30 mL) and brine (2 x 30 mL). Organic layer was separated, dried over anhydrous  $\text{Na}_2\text{SO}_4$ , filtered and the filtrate was evaporated to dryness. The crude residue thus obtained was purified flash column chromatography to afford **4b** (0.26 g, 96% yield).  $^1\text{H}$  NMR (500 MHz,  $\text{CDCl}_3$ )  $\delta$  10.66 – 9.83 (m, 1H), 7.87 – 7.59 (m, 1H), 7.35 (t,  $J = 6.2$  Hz, 0.5H), 6.67 (t,  $J = 5.4$  Hz, 0.5H), 5.84 (dd,  $J = 6.5, 2.0$  Hz, 1H), 5.63 (ddd,  $J = 13.2, 8.2, 1.5$  Hz, 1H), 4.51 – 4.33 (m, 1H), 4.28 – 4.11 (m, 3H), 3.65 – 3.58 (m, 1H), 3.52 (d,  $J = 6.2$  Hz, 3H), 2.25 (tt,  $J = 7.4, 5.3$  Hz, 1H), 2.16 (dt,  $J = 7.8, 6.4$  Hz, 1H), 1.49 – 1.39 (m, 2H), 1.33 – 1.16 (m, 12H), 0.85 (d,  $J = 14.5$  Hz, 12H), 0.07 – 0.04 (m, 6H) ppm.  $^{13}\text{C}$  NMR (101 MHz,  $\text{CDCl}_3$ )  $\delta$  164.0, 164.0, 152.6, 151.8, 150.4, 150.4, 140.0, 139.7, 101.9, 101.8, 88.5, 88.3, 83.9, 83.7, 82.5, 82.5, 71.4, 71.0, 69.4, 69.2, 60.4, 58.5, 58.4, 31.9, 31.8, 29.4, 29.4, 29.4, 29.4, 29.3, 29.3, 29.1, 26.6, 26.2, 26.0, 25.7, 25.7, 22.7, 18.1, 14.1, -4.7, -4.7, -4.9, -4.9 ppm. HRMS calcd. for  $\text{C}_{26}\text{H}_{48}\text{N}_3\text{O}_6\text{Si}$  [ $\text{M} + \text{H}$ ] $^+$  526.3312, found 526.3314.

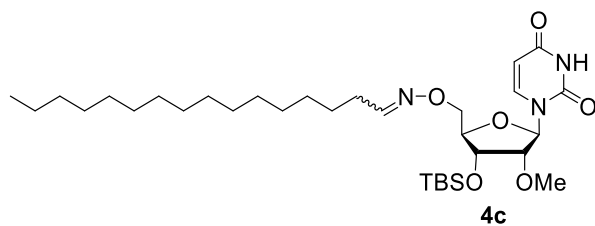

**Palmitaldehyde-O-(((2R,3R,4R,5R)-3-((tert-butyldimethylsilyl)oxy)-5-(2,4-dioxo-3,4-dihydropyrimidin-1(2H)-yl)-4-methoxytetrahydrofuran-2-yl)methyl) oxime (4c):** To a solution of **3** (2.00 g, 5.16 mmol) in DCM (50 mL) were added 1-hexadecanal (1.30 g, 5.42 mmol) and DIPEA (2.62 mL, 15.4 mmol). The reaction mixture was stirred for 1 hr at ambient temperature then concentrated. The crude material was purified by flash column chromatography (75% hexane in AcOEt) to give compound **4c** (2.21 g, 70% yield).  $^1\text{H}$  NMR (500 MHz,  $\text{CDCl}_3$ )  $\delta$  9.15 (s, 1H), 7.82 – 7.71 (m, 1H), 7.38 (t,  $J = 6.2$  Hz, 0.5H), 6.70 (t,  $J = 5.4$  Hz, 0.5H), 5.87 (dd,  $J = 6.0, 2.2$  Hz, 1H), 5.66 (dd,  $J = 13.0, 8.2$  Hz, 1H), 4.54 – 4.36 (m, 1H), 4.29 – 4.14 (m, 3H), 3.67 – 3.60 (m, 1H), 3.55 (d,  $J = 5.9$  Hz, 3H), 2.29 (tdd,  $J = 7.4, 5.4, 4.2$  Hz, 1H), 2.23 – 2.15 (m, 1H), 1.56 – 1.39 (m, 2H), 1.25 (s, 25H), 0.89 (d,  $J = 14.8$  Hz, 12H), 0.12 – 0.06 (m, 6H) ppm.  $^{13}\text{C}$  NMR (101 MHz,  $\text{CDCl}_3$ )  $\delta$  163.4, 163.4, 152.8, 152.0, 150.2, 150.2, 140.1, 139.8, 102.0, 101.9, 88.5, 88.4, 84.0, 83.9, 82.8, 82.7, 71.6, 71.2, 69.6, 69.4, 58.6, 58.6, 32.1, 29.8, 29.8, 29.8, 29.7, 29.6, 29.6, 29.6, 29.5, 29.5, 29.5, 29.4, 29.3, 26.8, 26.4, 26.2, 25.8, 22.8, 18.3, 14.2, -4.6, -4.6, -4.7, -4.8 ppm. HRMS calcd. for  $\text{C}_{32}\text{H}_{60}\text{N}_3\text{O}_6\text{Si}$  [ $\text{M} + \text{H}$ ] $^+$  610.4251, found 610.4243.

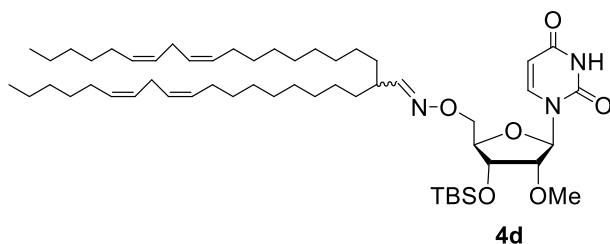

**1-[(2R,5R)-4-[tert-butyl(dimethyl)silyl]oxy-3-methoxy-5-[[E]-[(11Z,14Z)-2-[(9Z,12Z)-octadeca-9,12-dienyl]jcosa-11,14-dienylidene]amino]oxymethyl]tetrahydrofuran-2-yl]pyrimidine-2,4-dione (4d):** To a solution of **3** (0.4 g, 1.03 mmol) in DCM (20 mL), (11Z,14Z)-2-[(9Z,12Z)-octadeca-9,12-dienyl]jcosa-11,14-dienal (614.23 mg, 1.14 mmol) was added. To the resulting mixture, glacial acetic acid (1 mL) was added in single portion and stirred for 3 hr at 25 °C. Reaction mixture was diluted with DCM (20 mL) and water (30 mL) was added. Organic layer was separated, dried over anhydrous  $\text{Na}_2\text{SO}_4$ , filtered and filtrate was evaporated to dryness. Crude compound was purified by flash column chromatography (gradient: 0-40% EtOAc in hexane) to afford **4d** (0.76 g, 81% yield).  $^1\text{H}$  NMR (400 MHz,  $\text{CDCl}_3$ )  $\delta$  9.45 (s, 1H), 7.83 (d,  $J = 8.2$  Hz, 1H), 7.14 (d,  $J = 8.4$  Hz, 1H), 5.89 (dd,  $J = 14.9, 2.3$  Hz, 1H), 5.66 (ddd,  $J = 8.2, 4.0, 1.6$  Hz, 1H), 5.43 – 5.26 (m, 8H), 4.42 (dd,  $J = 12.1, 2.4$  Hz, 1H), 4.27 – 4.13 (m, 3H), 3.64 (dd,  $J = 4.7, 2.2$  Hz, 1H), 3.54 (d,  $J = 5.5$  Hz, 3H), 2.82 – 2.68 (m, 4H), 2.20 (dt,  $J = 8.5, 5.3$  Hz, 1H), 2.04 (q,  $J = 6.9$  Hz, 8H), 1.48 – 1.21 (m, 44H), 0.89 (d,  $J = 7.9$  Hz, 13H), 0.09 (d,  $J = 3.0$  Hz, 6H) ppm.  $^{13}\text{C}$  NMR (101 MHz,  $\text{CDCl}_3$ )  $\delta$  163.5, 157.0, 155.9, 150.2, 140.1, 139.8, 130.3, 130.3, 130.2, 130.2, 130.2, 128.1, 128.1, 128.1, 128.0, 102.2, 101.9, 88.5, 88.3, 83.9, 83.0, 82.7, 77.5, 77.2, 76.8, 71.8, 71.1, 69.6, 69.5, 58.6, 58.6, 39.9, 36.5, 33.1, 33.1, 32.9, 31.7, 30.0, 29.9, 29.8, 29.8, 29.7, 29.7, 29.7, 29.6, 29.5, 29.4, 29.4, 27.4, 27.3, 27.2, 25.8, 25.8, 22.7, 18.3, 18.2, 14.2, -4.5, -4.7 ppm. HRMS calcd. for  $\text{C}_{54}\text{H}_{96}\text{N}_3\text{O}_6\text{Si}$  [ $\text{M} + \text{H}$ ] $^+$  910.7068, found 910.7077.

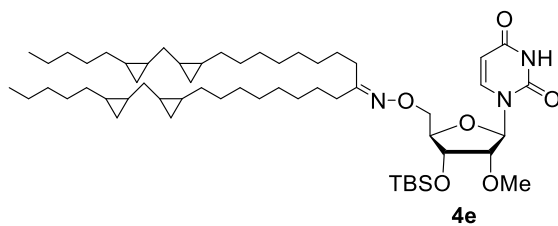

**1-[(2R,5R)-4-[tert-butyl(dimethyl)silyl]oxy-3-methoxy-5-[[[9-[2-[(2-pentylcyclopropyl)methyl]cyclopropyl]-1-[8-[2-[(2-pentylcyclopropyl)methyl]cyclopropyl]octyl]nonylidene]amino]oxymethyl]tetrahydrofuran-2-yl]pyrimidine-2,4-dione (4e):** To a solution of **3** (0.69 g, 1.78 mmol) in DCM (20 mL), 1,17-bis[2-[(2-pentylcyclopropyl)methyl]cyclopropyl]heptadecan-9-one (2.08 g, 3.56 mmol) was added. To the resulting mixture, glacial acetic acid (4 mL) was added in single portion and stirred for 4 hr at 25 °C. Reaction mixture was diluted with DCM (20 mL) and DI water (30 mL) was added. Organic layer was separated, dried over anhydrous Na<sub>2</sub>SO<sub>4</sub>, filtered and filtrate was evaporated to dryness. Crude compound was purified by flash column chromatography (gradient: 0-40% EtOAc in hexane) to afford (1.4 g, 83% yield) **4e** as transparent gum. <sup>1</sup>H NMR (400 MHz, CDCl<sub>3</sub>) δ 9.67 – 9.40 (m, 0H), 7.75 (d, *J* = 8.1 Hz, 1H), 5.90 (d, *J* = 2.4 Hz, 1H), 5.64 (dd, *J* = 8.1, 2.0 Hz, 1H), 4.42 (dd, *J* = 12.3, 2.3 Hz, 1H), 4.27 – 4.12 (m, 3H), 3.62 (dd, *J* = 4.8, 2.4 Hz, 1H), 3.54 (s, 3H), 2.41 – 2.32 (m, 2H), 2.30 – 2.21 (m, 2H), 2.19 – 2.11 (m, 2H), 1.53 – 1.24 (m, 54H), 1.20 – 0.96 (m, 5H), 0.89 (d, *J* = 8.1 Hz, 14H), 0.82 – 0.72 (m, 5H), 0.72 – 0.63 (m, 6H), 0.60 (td, *J* = 8.3, 4.1 Hz, 5H), 0.09 (d, *J* = 3.7 Hz, 6H), -0.29 (ddd, *J* = 11.1, 9.5, 5.1 Hz, 6H) ppm. <sup>13</sup>C NMR (101 MHz, CDCl<sub>3</sub>) δ 163.6, 162.4, 150.3, 134.0, 137.9, 129.1, 128.3, 125.4, 102.0, 88.2, 84.0, 83.1, 77.4, 71.2, 69.6, 58.6, 42.9, 34.0, 32.0, 30.3, 30.3, 30.1, 30.0, 29.7, 29.7, 29.6, 29.6, 29.6, 29.6, 29.5, 29.4, 29.0, 29.0, 28.9, 28.8, 28.4, 28.2, 28.0, 26.8, 26.1, 25.8, 24.0, 22.8, 21.6, 18.3, 16.2, 16.1, 16.0, 16.0, 15.8, 15.8, 15.8, 14.2, 11.2, 11.0, -4.6, -4.7 ppm. HRMS calcd. for C<sub>57</sub>H<sub>102</sub>N<sub>3</sub>O<sub>6</sub>Si [M + H]<sup>+</sup> 952.7538, found 952.7557.

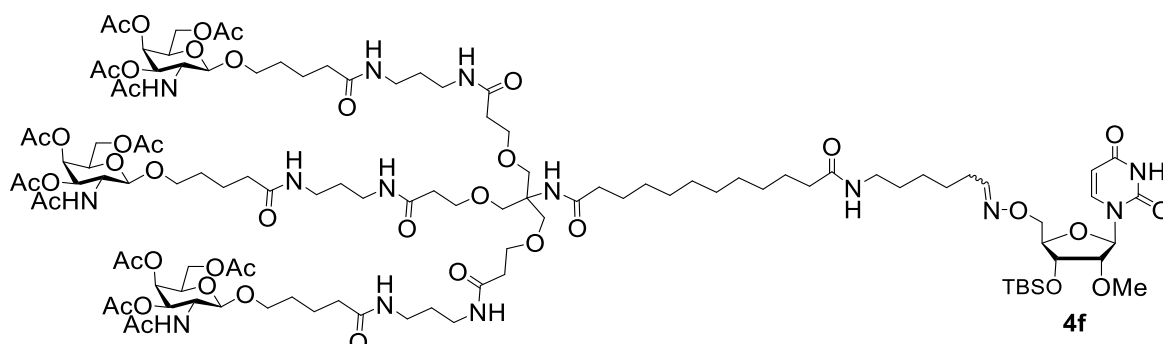

**[(3R,6R)-5-acetamido-6-[5-[3-[3-[3-[3-[5-[(2R,5R)-3-acetamido-4,5-diacetoxy-6-(acetoxymethyl)tetrahydropyran-2-yl]oxypentanoylamino]propylamino]-3-oxo-propoxy]-2-[[3-[3-[5-[(2R,5R)-3-acetamido-4,5-diacetoxy-6-(acetoxymethyl)tetrahydropyran-2-yl]oxypentanoylamino]propylamino]-3-oxo-propoxy]methyl]-2-[[12-[[6Z]-6-[(2R,5R)-3-[tert-butyl(dimethyl)silyl]oxy-5-(2,4-dioxypyrimidin-1-yl)-4-methoxy-tetrahydrofuran-2-yl]methoxyimino]hexyl]amino]-12-oxo-dodecanoyl]amino]propoxy]propanoylamino]propylamino]-5-oxo-pentoxyl]-3,4-diacetoxy-tetrahydropyran-2-yl]methyl acetate (4f):** To a clear solution of **3** (90.00 mg, 232.26 μmol) in DCM (20 mL), was added DIPEA (30.02 mg, 232.26 μmol, 40.45 μL) at 22°C. The resulting mixture was stirred for 5 minutes and then to this reaction mixture, added aldehyde **3S** (488.52 mg, 232.26 μmol) in a single portion. The reaction mixture was stirred for 18 hr and TLC was checked which showed consumption of starting materials. All the volatile matters were evaporated to dryness and the gummy residue obtained, was purified by flash column chromatography (gradient: 0-10% MeOH in DCM) to afford **4f** (0.41 g, 71% yield) as yellowish white foam. <sup>1</sup>H NMR (600 MHz, DMSO-*d*<sub>6</sub>) δ 11.42 (dd, *J* = 7.3, 2.2 Hz, 1H), 7.88 – 7.82 (m, 6H), 7.78 – 7.72 (m, 3H), 7.70 (d, *J* = 8.1 Hz, 0H), 7.65 (d, *J* = 8.1 Hz, 0H), 7.49 (t, *J* = 6.0 Hz, 0H), 7.01 (s, 1H), 6.81 (t, *J* = 5.3 Hz, 0H), 5.79 (dd, *J* = 7.9, 4.4 Hz, 1H),

5.71 – 5.56 (m, 1H), 5.21 (d,  $J = 3.4$  Hz, 3H), 4.96 (dd,  $J = 11.3, 3.4$  Hz, 3H), 4.47 (d,  $J = 8.5$  Hz, 3H), 4.31 – 4.24 (m, 1H), 4.19 (dd,  $J = 12.3, 4.3$  Hz, 1H), 4.15 – 4.07 (m, 3H), 4.05 – 3.96 (m, 10H), 3.92 – 3.83 (m, 4H), 3.70 (dt,  $J = 9.5, 5.8$  Hz, 3H), 3.53 (dd,  $J = 12.6, 6.1$  Hz, 13H), 3.40 (dt,  $J = 9.7, 6.3$  Hz, 2H), 3.34 (s, 2H), 3.16 (d,  $J = 5.2$  Hz, 6H), 3.02 (h,  $J = 7.0$  Hz, 14H), 2.27 (t,  $J = 6.4$  Hz, 7H), 2.10 (s, 9H), 2.03 (q,  $J = 7.4$  Hz, 9H), 1.99 (s, 9H), 1.89 (s, 9H), 1.77 (s, 8H), 1.53 – 1.37 (m, 29H), 1.29 – 1.18 (m, 16H), 0.87 (d,  $J = 1.3$  Hz, 11H), 0.08 (q,  $J = 3.4$  Hz, 6H) ppm.  $^{13}\text{C}$  NMR (151 MHz, DMSO- $d_6$ )  $\delta$  172.5, 172.0, 172.0, 170.1, 170.1, 170.0, 169.7, 169.4, 163.1, 152.6, 152.0, 150.5, 150.4, 140.3, 140.2, 102.1, 101.9, 101.0, 86.9, 86.7, 82.4, 82.2, 81.5, 81.3, 72.0, 71.8, 70.5, 69.9, 69.8, 69.7, 68.7, 68.2, 67.3, 66.7, 61.5, 59.5, 57.7, 57.6, 49.3, 48.6, 36.4, 36.3, 36.0, 35.9, 35.5, 35.1, 29.4, 29.0, 28.9, 28.9, 28.8, 28.8, 28.7, 28.6, 26.2, 26.0, 25.7, 25.6, 25.6, 25.4, 25.4, 25.2, 22.8, 21.9, 20.6, 20.5, 20.5, 17.8, 17.8, -4.8, -4.8, -5.0, -5.1 ppm. MALDI calcd. for  $\text{C}_{113}\text{H}_{186}\text{N}_{14}\text{O}_{44}\text{SiNa}$  [ $\text{M} + \text{Na}$ ] $^+$  2495.86; found 2498.76.

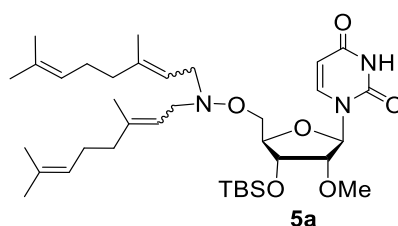

**1-[(2R,5R)-5-[[bis[(2E)-3,7-dimethylocta-2,6-dienyl]amino]oxymethyl]-4-[tert-butyl(dimethyl)silyl]oxy-3-methoxy-tetrahydrofuran-2-yl]pyrimidine-2,4-dione (5a):** To a solution of **4a** (0.6 g, 1.15 mmol) in glacial acetic acid (5 mL), sodium cyanoborohydride (2.6 equiv) was added at 15 °C and stirred for 1 hr. To the clear solution, citral (357.29 mg, 2.30 mmol, 402.35  $\mu\text{L}$ ) was added and stirred for 0.5 h and continued stirring for 30 minutes at 20 °C. Second portion of sodium cyanoborohydride (2.6 equiv) was then added to this reaction mixture and stirred for 2 hr. TLC showed completion of reaction. After diluting the reaction mixture with DCM (20 mL), water (20 mL) was added, and organic layer was separated. DCM layer dried over anhydrous  $\text{CaCl}_2$ , filtered and filtrate was evaporated to dryness. Crude residue thus obtained was purified by flash column chromatography (gradient: 10-50% EtOAc in hexane) to afford **5a** (0.58 g, 76% yield).  $^1\text{H}$  NMR (500 MHz,  $\text{CDCl}_3$ )  $\delta$  9.31 (s, 1H), 8.00 – 7.91 (m, 1H), 5.92 (t,  $J = 2.5$  Hz, 1H), 5.66 (dd,  $J = 8.1, 1.7$  Hz, 1H), 5.33 – 5.25 (m, 2H), 5.07 (ddq,  $J = 8.5, 5.4, 1.5$  Hz, 2H), 4.18 – 4.05 (m, 3H), 3.88 (ddd,  $J = 10.5, 6.1, 2.6$  Hz, 1H), 3.61 (dd,  $J = 4.7, 2.9$  Hz, 1H), 3.53 – 3.48 (m, 3H), 3.37 (q,  $J = 7.6$  Hz, 4H), 2.12 – 1.97 (m, 8H), 1.73 (dd,  $J = 2.6, 1.4$  Hz, 2H), 1.67 – 1.64 (m, 8H), 1.59 (dd,  $J = 6.3, 1.3$  Hz, 6H), 0.90 (s, 9H), 0.09 (d,  $J = 6.8$  Hz, 6H) ppm.  $^{13}\text{C}$  NMR (101 MHz,  $\text{CDCl}_3$ )  $\delta$  163.6, 150.3, 140.4, 140.4, 139.8, 139.8, 139.7, 132.1, 131.8, 124.0, 124.0, 124.0, 120.3, 120.2, 119.4, 101.9, 101.8, 87.8, 84.0, 84.0, 84.0, 83.0, 83.0, 77.5, 77.2, 76.8, 71.2, 71.1, 70.0, 69.9, 58.4, 58.3, 55.5, 55.4, 55.3, 55.2, 39.9, 32.5, 26.6, 26.6, 26.6, 25.8, 25.8, 23.8, 23.7, 18.2, 17.8, 17.8, 16.7, 16.7, -4.5, -4.7 ppm. HRMS calcd. for  $\text{C}_{36}\text{H}_{62}\text{N}_3\text{O}_6\text{Si}$  [ $\text{M} + \text{H}$ ] $^+$  660.4408, found 660.4403.

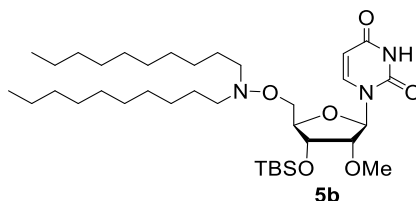

**1-[(2R,5R)-4-[tert-butyl(dimethyl)silyl]oxy-5-[(didecylamino)oxymethyl]-3-methoxy-tetrahydrofuran-2-yl]pyrimidine-2,4-dione (5b):** To a solution of **4b** (550.00 mg, 1.05 mmol) in acetic acid (3 mL) was added sodium cyanoborohydride (184 mg, 2.93 mmol) under 15 °C. The reaction mixture was stirred for 1 hr at 15 °C and decanal (500.41 mg, 3.14 mmol, 349.94  $\mu\text{L}$ ) in DCM (2 mL) was added. The stirring was continued for 30 min and additional amount of sodium cyanoborohydride (184

mg, 2.93 mmol) was added. The resulting mixture was stirred for another 2 hr and then diluted with DCM and washed with ice water. The organic layer was separated and concentrated. The crude material was purified by flash column chromatography (0-50% EtOAc in hexane) to afford **5b** (0.52 g, 74% yield). <sup>1</sup>H NMR (500 MHz, CDCl<sub>3</sub>) δ 9.21 (d, *J* = 7.4 Hz, 1H), 8.01 (d, *J* = 8.1 Hz, 1H), 5.91 (d, *J* = 2.3 Hz, 1H), 5.67 (dd, *J* = 8.2, 1.5 Hz, 1H), 4.16 (dd, *J* = 7.0, 4.9 Hz, 1H), 4.10 – 4.04 (m, 2H), 3.92 – 3.83 (m, 1H), 3.63 (d, *J* = 6.6 Hz, 2H), 3.60 (dd, *J* = 4.9, 2.4 Hz, 1H), 3.52 (s, 3H), 2.67 (td, *J* = 7.0, 2.3 Hz, 4H), 1.55 (dt, *J* = 14.5, 7.0 Hz, 6H), 1.34 – 1.22 (m, 43H), 0.90 (s, 9H), 0.87 (t, *J* = 6.8 Hz, 10H), 0.09 (d, *J* = 6.6 Hz, 6H) ppm. <sup>13</sup>C NMR (101 MHz, CDCl<sub>3</sub>) δ 163.5, 150.3, 140.4, 101.7, 87.9, 84.1, 82.9, 77.5, 77.2, 76.8, 71.2, 69.6, 63.2, 59.3, 58.3, 33.0, 32.0, 29.7, 29.7, 29.7, 29.6, 29.4, 27.6, 27.2, 25.9, 25.8, 22.8, 18.2, 14.2, -4.4, -4.7 ppm. HRMS calcd. for C<sub>36</sub>H<sub>70</sub>N<sub>3</sub>O<sub>6</sub>Si [M + H]<sup>+</sup> 668.5034, found 668.5040.

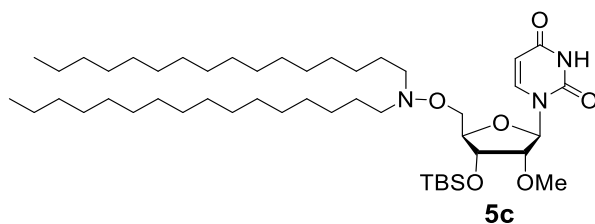

**1-[(2R,5R)-4-[tert-butyl(dimethyl)silyloxy]-5-[(dihexadecylamino)oxymethyl]-3-methoxy-tetrahydrofuran-2-yl]pyrimidine-2,4-dione (5c):** To a solution of **4c** (0.12 g, 196.75 μmol) in glacial acetic acid (0.3 mL) was added sodium cyanoborohydride (33.84 mg, 511.55 μmol) under 15 °C. The reaction mixture was stirred for 1 hr at 15 °C and hexadecanal (141.91 mg, 590.25 μmol) in DCM (0.2 mL) was added. The stirring was continued for 30 min and additional amount of sodium cyanoborohydride (33.84 mg, 511.55 μmol) was added. The resulting mixture was stirred for another 2 hr and then diluted with DCM (10 mL) and washed with ice water. The organic layer was separated, dried over anhydrous Na<sub>2</sub>SO<sub>4</sub> and concentrated. The crude material was purified by flash silica gel column chromatography (5% MeOH in DCM) to give **5c** (0.145 g, 88% yield). <sup>1</sup>H NMR (400 MHz, CDCl<sub>3</sub>) δ 9.03 (s, 1H), 8.03 (d, *J* = 8.2 Hz, 1H), 5.92 (d, *J* = 2.3 Hz, 1H), 5.67 (d, *J* = 8.1 Hz, 1H), 4.16 (dd, *J* = 6.9, 4.8 Hz, 1H), 4.12 – 4.04 (m, 2H), 3.90 – 3.84 (m, 1H), 3.68 – 3.57 (m, 1H), 3.52 (s, 3H), 2.73 – 2.62 (m, 4H), 1.53 (p, *J* = 6.9 Hz, 5H), 1.25 (bs, 60H), 0.89 (d, *J* = 11.9 Hz, 15H), 0.09 (d, *J* = 5.4 Hz, 6H) ppm. <sup>13</sup>C NMR (101 MHz, CDCl<sub>3</sub>) δ 175.3, 163.5, 150.2, 140.5, 101.7, 87.9, 84.1, 82.9, 71.2, 69.6, 63.3, 59.3, 58.3, 33.0, 32.1, 29.9, 29.8, 29.8, 29.8, 29.7, 29.6, 29.5, 27.6, 27.3, 25.9, 25.8, 22.8, 20.7, 18.3, 14.3, -4.4, -4.7 ppm. HRMS calcd. for C<sub>48</sub>H<sub>94</sub>N<sub>3</sub>O<sub>6</sub>Si [M + H]<sup>+</sup> 836.6912, found 836.6922.

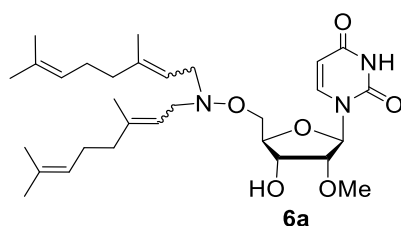

**1-[(2R,5R)-5-[[bis[(2E)-3,7-dimethylocta-2,6-dienyl]amino]oxymethyl]-4-hydroxy-3-methoxy-tetrahydrofuran-2-yl]pyrimidine-2,4-dione (6a):** To a solution of **5a** (0.5 g, 757.61 μmol) in THF (20 mL) at 25 °C, tetrabutylammonium fluoride (300.13 mg, 1.14 mmol) was added slowly in single portion and then stirred for 16 hr. Volatile matters were removed in high vacuum pump and crude residue thus obtained was purified by flash column chromatography (gradient: 10-60% EtOAc in hexane) to afford **6a** (0.31 g, 75% yield). <sup>1</sup>H NMR (500 MHz, CDCl<sub>3</sub>) δ 9.42 – 9.38 (m, 1H), 8.00 – 7.90 (m, 1H), 5.97 – 5.92 (m, 1H), 5.68 (dt, *J* = 8.1, 1.5 Hz, 1H), 5.35 – 5.28 (m, 2H), 5.12 – 5.05 (m, 2H), 4.21 – 4.08 (m, 2H), 4.03 (dq, *J* = 5.5, 2.7 Hz, 1H), 3.94 (ddd, *J* = 11.0, 5.1, 2.7 Hz, 1H), 3.74 (dd, *J* = 5.2, 2.4 Hz, 1H), 3.60 (s, 2H), 3.37 (t, *J* = 5.7 Hz, 4H), 2.71 (dd, *J* = 7.9, 3.1 Hz, 1H), 2.13 – 1.99 (m, 7H), 1.74 (d, *J* = 1.5 Hz, 2H), 1.71 – 1.64 (m, 10H), 1.60 (dd, *J* = 5.0, 1.3 Hz, 6H) ppm. <sup>13</sup>C NMR (126 MHz, CDCl<sub>3</sub>) δ 163.5, 163.5, 150.3, 140.2, 140.2, 139.9, 139.7, 139.7, 132.1, 131.8, 124.1,

124.0, 120.2, 119.5, 119.4, 102.0, 101.9, 87.4, 84.0, 83.9, 83.2, 71.3, 71.2, 68.8, 68.8, 60.5, 58.8, 55.9, 55.6, 39.8, 32.4, 26.6, 26.6, 26.5, 25.8, 25.8, 23.7, 23.7, 17.8, 16.7, 16.7 ppm. HRMS calcd. for  $C_{30}H_{48}N_3O_6$   $[M + H]^+$  546.3543, found 546.3548.

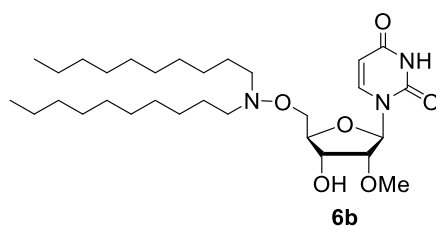

**1-[(2R,5R)-5-[(didecylamino)oxymethyl]-4-hydroxy-3-methoxy-tetrahydrofuran-2-yl]pyrimidine-2,4-dione (6b):** To a clear solution of **5b** (0.51 g, 0.76 mmol) in tetrahydrofuran (10 mL), TBAF (0.24 g, 0.92 mmol) was slowly added and stirred at 20 °C for 16 hr. Volatile matters were evaporated when TLC showed completion of the reaction. The crude mass thus obtained was purified by flash column chromatography (gradient: 0-70% EtOAc in hexane) to afford **6b** (0.21 g, 50% yield).  $^1H$  NMR (500 MHz,  $CDCl_3$ )  $\delta$  8.75 (s, 1H), 8.00 (d,  $J = 8.1$  Hz, 1H), 5.95 (d,  $J = 2.3$  Hz, 1H), 5.68 (d,  $J = 8.1$  Hz, 1H), 4.22 (td,  $J = 7.4, 5.1$  Hz, 1H), 4.13 (dd,  $J = 11.0, 2.3$  Hz, 1H), 4.03 (dt,  $J = 7.1, 2.5$  Hz, 1H), 3.93 (dd,  $J = 11.0, 2.7$  Hz, 1H), 3.74 (dd,  $J = 5.2, 2.3$  Hz, 1H), 3.61 (s, 2H), 2.67 (qd,  $J = 9.6, 8.2, 3.5$  Hz, 5H), 1.55 (p,  $J = 7.2$  Hz, 4H), 1.36 – 1.18 (m, 29H), 0.88 (t,  $J = 6.9$  Hz, 5H) ppm.  $^{13}C$  NMR (101 MHz,  $CDCl_3$ )  $\delta$  163.1, 150.2, 140.1, 101.9, 87.4, 83.9, 83.2, 71.3, 68.7, 59.5, 58.8, 32.0, 29.7, 29.7, 29.7, 29.5, 27.6, 27.3, 22.8, 14.2 ppm. HRMS calcd. for  $C_{30}H_{56}N_3O_6$   $[M + H]^+$  554.4169, found 554.4178.

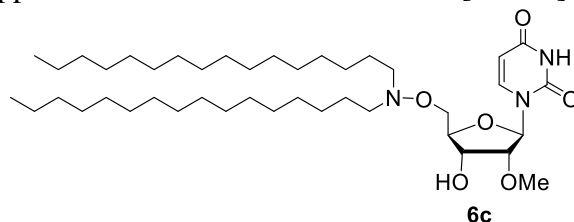

**1-[(2R,5R)-5-[(dihexadecylamino)oxymethyl]-4-hydroxy-3-methoxy-tetrahydrofuran-2-yl]pyrimidine-2,4-dione (6c):** To a solution of **5c** (0.12 g, 143.48  $\mu$ mol) in THF (10 mL) at 25 °C, tetrabutylammonium fluoride, 1M in THF (56.84 mg, 215.22  $\mu$ mol) was added slowly in single portion and then stirred for 12 hr. Volatile matters were removed in high vacuum pump and crude residue thus obtained was purified by flash column chromatography (gradient: 10-60% EtOAc in hexane) to afford **6c** (0.091 g, 88% yield).  $^1H$  NMR (500 MHz,  $CDCl_3$ )  $\delta$  8.55 (d,  $J = 2.3$  Hz, 1H), 7.99 (d,  $J = 8.2$  Hz, 1H), 5.95 (d,  $J = 2.2$  Hz, 1H), 5.68 (dd,  $J = 8.1, 2.2$  Hz, 1H), 4.22 (td,  $J = 7.6, 5.2$  Hz, 1H), 4.13 (dd,  $J = 11.0, 2.3$  Hz, 1H), 4.03 (dt,  $J = 7.1, 2.5$  Hz, 1H), 3.93 (dd,  $J = 11.0, 2.7$  Hz, 1H), 3.74 (dd,  $J = 5.2, 2.3$  Hz, 1H), 3.61 (s, 3H), 2.72 – 2.61 (m, 5H), 1.55 (p,  $J = 7.2$  Hz, 5H), 1.25 (s, 55H), 0.88 (t,  $J = 6.9$  Hz, 6H) ppm.  $^{13}C$  NMR (151 MHz,  $CDCl_3$ )  $\delta$  163.1, 150.2, 140.1, 101.9, 87.3, 83.9, 83.2, 71.3, 68.6, 59.5, 58.8, 32.1, 29.8, 29.8, 29.8, 29.8, 29.7, 29.5, 27.6, 27.2, 22.8, 14.3 ppm. HRMS calcd. for  $C_{42}H_{80}N_3O_6$   $[M + H]^+$  722.6047, found 722.6061.

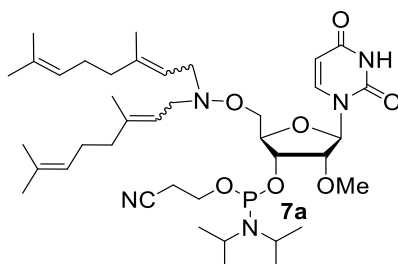

**3-[[[(2R,5R)-2-[[bis[(2E)-3,7-dimethylocta-2,6-dienyl]amino]oxymethyl]-5-(2,4-dioxypyrimidin-1-yl)-4-methoxy-tetrahydrofuran-3-yl]oxy-(diisopropylamino)phosphanyl]oxypropane-nitrile (7a):**

To a clear solution of **6a** (0.3 g, 549.74  $\mu\text{mol}$ ) in DCM (10 mL), diisopropylethylamine (DIPEA) (358.83 mg, 2.75 mmol, 483.60  $\mu\text{L}$ ) and N-methylimidazole (NMI) (159.56 mg, 1.92 mmol, 154.92  $\mu\text{L}$ ) were added at 25  $^{\circ}\text{C}$ . To this reaction mixture, 2-cyanoethyl-*N,N*-diisopropylchlorophosphoramidite (273.92 mg, 1.10 mmol, 258.42  $\mu\text{L}$ ) was added slowly after 5 minutes and stirred for 0.5 hr. Reaction mixture was diluted with DCM (20 mL) and quenched with 10%  $\text{NaHCO}_3$  solution (20 mL). Organic layer was separated, dried on anhydrous  $\text{Na}_2\text{SO}_4$ , filtered and filtrate was evaporated to dryness. The crude compound was thus obtained was purified by flash column chromatography (gradient: 10-50% EtOAc in hexane) to afford **7a** (0.32 g, 78% yield).  $^1\text{H}$  NMR (400 MHz,  $\text{CDCl}_3$ )  $\delta$  8.44 (s, 1H), 7.97 – 7.81 (m, 1H), 6.05 – 5.96 (m, 1H), 5.67 (dd,  $J$  = 8.2, 2.6 Hz, 1H), 5.36 – 5.25 (m, 1H), 5.08 (dddp,  $J$  = 5.5, 4.1, 2.8, 1.4 Hz, 2H), 4.31 (dddd,  $J$  = 17.1, 14.6, 8.4, 4.8 Hz, 1H), 4.17 – 4.04 (m, 1H), 3.97 – 3.76 (m, 3H), 3.73 – 3.55 (m, 1H), 3.54 – 3.45 (m, 3H), 3.45 – 3.34 (m, 4H), 2.73 – 2.57 (m, 2H), 2.05 (q,  $J$  = 8.0 Hz, 9H), 1.77 – 1.52 (m, 19H), 1.35 – 1.14 (m, 13H) ppm.  $^{13}\text{C}$  NMR (151 MHz,  $\text{CDCl}_3$ )  $\delta$  163.0, 163.0, 150.3, 150.3, 150.2, 140.3, 140.3, 140.2, 140.2, 140.1, 139.9, 139.8, 139.8, 139.7, 139.7, 139.7, 132.2, 131.9, 124.0, 124.0, 124.0, 123.9, 123.9, 120.4, 120.2, 119.5, 119.3, 117.8, 117.6, 102.3, 102.2, 102.2, 102.2, 102.1, 87.4, 87.3, 87.3, 87.2, 83.5, 83.5, 83.0, 83.0, 83.0, 82.8, 82.7, 82.6, 82.6, 82.6, 82.6, 71.8, 71.7, 71.7, 71.6, 71.3, 71.2, 70.6, 70.6, 70.5, 70.5, 59.0, 58.9, 58.9, 58.8, 58.8, 58.7, 58.3, 58.3, 58.0, 57.9, 55.7, 55.5, 55.4, 55.3, 55.3, 53.6, 43.5, 43.5, 43.5, 43.4, 39.9, 32.6, 32.5, 32.5, 26.7, 26.7, 26.6, 26.6, 26.6, 25.8, 25.8, 24.8, 24.7, 24.7, 23.8, 23.8, 20.5, 20.5, 20.5, 17.8, 17.8, 17.8, 16.7, 16.7 ppm.  $^{31}\text{P}$  NMR (162 MHz,  $\text{CDCl}_3$ )  $\delta$  152.28, 152.25, 152.12, 152.07, 152.00 ppm. HRMS calcd. for  $\text{C}_{39}\text{H}_{65}\text{N}_5\text{O}_7\text{P}$  [ $\text{M} + \text{H}$ ] $^+$  746.4622, found 746.4630.

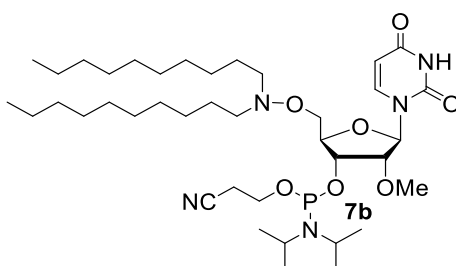

**3-[[*(2R,5R)*-2-[(didecylamino)oxymethyl]-5-(2,4-dioxypyrimidin-1-yl)-4-methoxy-tetrahydrofuran-3-yl]oxy-(diisopropylamino)phosphanyl]oxypropanenitrile (**7b**):** To a clear solution of **6b** (0.2 g, 0.36 mmol) in DCM (10 mL), was added DIPEA (0.28 g, 2.17 mmol, 0.38 mL) and NMI (0.104 g, 1.26 mmol, 0.10 mL) at 22  $^{\circ}\text{C}$ . The reaction mixture was stirred for 5 minutes and 2-cyanoethyl-*N,N*-diisopropylchlorophosphoramidite (0.171 g, 0.72 mmol, 0.16 mL) was added in single portion. Stirring was continued for 1.25 hr at 22  $^{\circ}\text{C}$  after which the reaction mixture was diluted with DCM (20 mL) and saturated  $\text{NaHCO}_3$  solution (20 mL) was added. Organic layer was washed with brine (30 mL), separated, dried over anhydrous  $\text{Na}_2\text{SO}_4$ , and filtered. The filtrate was evaporated to dryness and the crude mass thus obtained, was purified by flash column chromatography to afford **7b** (0.22 g, 81% yield) as transparent gum.  $^1\text{H}$  NMR (500 MHz,  $\text{CDCl}_3$ )  $\delta$  8.34 (s, 1H), 7.94 (dd,  $J$  = 27.9, 8.2 Hz, 1H), 5.99 (dd,  $J$  = 4.0, 2.3 Hz, 1H), 5.67 (dd,  $J$  = 8.2, 3.0 Hz, 1H), 4.37 – 4.24 (m, 1H), 4.19 (dt,  $J$  = 5.2, 2.5 Hz, 1H), 4.10 – 4.03 (m, 1H), 3.97 – 3.79 (m, 4H), 3.77 – 3.58 (m, 2H), 3.51 (d,  $J$  = 9.8 Hz, 3H), 2.75 – 2.56 (m, 6H), 1.62 – 1.48 (m, 5H), 1.34 – 1.13 (m, 48H), 0.88 (t,  $J$  = 6.9 Hz, 6H) ppm.  $^{13}\text{C}$  NMR (151 MHz,  $\text{CDCl}_3$ )  $\delta$  163.4, 163.3, 150.4, 150.3, 140.2, 140.1, 117.8, 117.5, 102.1, 101.9, 87.5, 87.5, 83.5, 83.5, 83.0, 83.0, 82.4, 82.4, 82.4, 82.3, 71.8, 71.5, 70.5, 70.4, 70.2, 70.1, 60.5, 59.3, 59.2, 58.8, 58.8, 58.8, 58.8, 58.8, 58.7, 58.6, 58.5, 58.3, 58.3, 58.2, 58.1, 43.5, 43.4, 43.4, 43.3, 32.0, 29.8, 29.7, 29.7, 29.7, 29.7, 29.4, 29.4, 27.6, 27.6, 27.2, 27.2, 24.8, 24.7, 24.7, 24.7, 22.8, 20.5, 20.5, 14.2 ppm.  $^{31}\text{P}$  NMR (162 MHz,  $\text{CDCl}_3$ )  $\delta$  151.93, 151.89 ppm. HRMS calcd. for  $\text{C}_{39}\text{H}_{73}\text{N}_5\text{O}_7\text{P}$  [ $\text{M} + \text{H}$ ] $^+$  754.5248, found 754.5247.

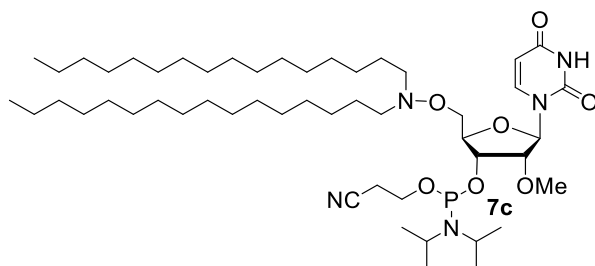

**3-[[[(2R,5R)-2-[(dihexadecylamino)oxymethyl]-5-(2,4-dioxypyrimidin-1-yl)-4-methoxy-tetrahydrofuran-3-yl]oxy-(diisopropylamino)phosphanyl]oxypropanenitrile (7c):** To a clear solution of **6c** (0.08 g, 110.79  $\mu\text{mol}$ ) in DCM (10 mL), DIPEA (72.32 mg, 553.95  $\mu\text{mol}$ , 97.46  $\mu\text{L}$ ) and NMI (32.16 mg, 387.76  $\mu\text{mol}$ , 31.22  $\mu\text{L}$ ) were added at 25 °C. To this reaction mixture, 2-cyanoethyl-*N,N*-diisopropylchlorophosphoramidite (55.20 mg, 221.58  $\mu\text{mol}$ , 52.08  $\mu\text{L}$ ) was added slowly after 5 minutes and stirred for 1 hr. Reaction mixture was diluted with DCM (20 mL) and quenched with 10%  $\text{NaHCO}_3$  solution (20 mL). Organic layer was separated, dried on anhydrous  $\text{Na}_2\text{SO}_4$ , filtered and filtrate was evaporated to dryness. The crude compound was thus obtained was purified by flash column chromatography (gradient: 10-50% EtOAc in hexane) to afford **7c** (0.085 g, 83% yield).  $^1\text{H}$  NMR (400 MHz,  $\text{CDCl}_3$ )  $\delta$  8.76 (s, 1H), 8.08 – 7.71 (m, 1H), 5.99 (t,  $J = 3.6$  Hz, 1H), 5.67 (dd,  $J = 8.2, 2.7$  Hz, 1H), 4.42 – 4.23 (m, 1H), 4.21 – 4.02 (m, 3H), 3.96 – 3.77 (m, 4H), 3.74 – 3.57 (m, 2H), 3.51 (d,  $J = 6.6$  Hz, 3H), 2.65 (ddd,  $J = 17.1, 10.2, 6.2$  Hz, 6H), 1.54 (q,  $J = 7.3$  Hz, 4H), 1.35 – 1.14 (m, 63H), 0.91 – 0.82 (m, 6H) ppm.  $^{13}\text{C}$  NMR (151 MHz,  $\text{CDCl}_3$ )  $\delta$  163.0, 162.9, 150.2, 150.2, 140.3, 140.2, 117.8, 117.5, 102.1, 101.9, 87.6, 87.5, 83.6, 83.5, 83.0, 83.0, 82.5, 82.5, 71.8, 71.6, 70.7, 70.6, 70.3, 70.2, 59.3, 58.9, 58.8, 58.7, 58.3, 58.3, 58.2, 58.0, 43.5, 43.4, 43.4, 43.4, 32.1, 29.8, 29.8, 29.8, 29.8, 29.8, 29.7, 29.5, 27.7, 27.6, 27.3, 27.3, 24.8, 24.8, 24.8, 24.7, 24.7, 22.8, 20.6, 20.6, 20.5, 14.3 ppm.  $^{31}\text{P}$  NMR (162 MHz,  $\text{CDCl}_3$ )  $\delta$  152.0, 151.98 ppm. HRMS calcd. for  $\text{C}_{51}\text{H}_{97}\text{N}_5\text{O}_7\text{P}$  [ $\text{M} + \text{H}$ ] $^+$  922.7126, found 922.7106.

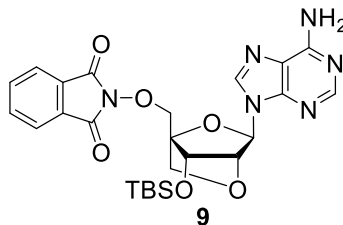

**2-[[[(4R,6R)-6-(6-aminopurin-9-yl)-7-[tert-butyl(dimethyl)silyl]oxy-2,5-dioxabicyclo[2.2.1]heptan-4-yl]methoxy]isoindoline-1,3-dione (9):** Commercially available compound **8** (1.0 g, 2.54 mmol) was converted to compound **9** (1.12 g, 82% yield) following the synthetic procedure mentioned for compound **2**.  $^1\text{H}$  NMR (600 MHz,  $\text{CDCl}_3$ )  $\delta$  8.11 (dd,  $J = 3.6, 1.3$  Hz, 1H), 7.97 (s, 1H), 7.63 – 7.54 (m, 4H), 6.38 – 6.11 (m, 1H), 5.84 (d,  $J = 1.8$  Hz, 1H), 4.66 (dd,  $J = 9.3, 2.2$  Hz, 2H), 4.48 (dd,  $J = 11.9, 1.8$  Hz, 1H), 4.39 (dd,  $J = 11.9, 1.9$  Hz, 1H), 4.03 (dd,  $J = 7.8, 2.7$  Hz, 1H), 3.93 (dd,  $J = 7.7, 2.5$  Hz, 1H), 0.74 (d,  $J = 3.5$  Hz, 9H), -0.00 (d,  $J = 2.3$  Hz, 3H), -0.03 (d,  $J = 2.3$  Hz, 3H) ppm.  $^{13}\text{C}$  NMR (151 MHz,  $\text{CDCl}_3$ )  $\delta$  163.1, 155.9, 155.8, 155.8, 153.1, 149.0, 149.0, 138.8, 138.8, 134.6, 128.7, 123.6, 120.0, 86.8, 86.4, 79.3, 72.7, 72.4, 72.3, 60.5, 25.6, 17.9, -4.7, -5.0 ppm. HRMS calcd. for  $\text{C}_{25}\text{H}_{31}\text{N}_6\text{O}_6\text{Si}$  [ $\text{M} + \text{H}$ ] $^+$  539.2074, found 539.2067.

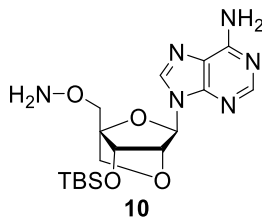

**O-[[[(4R,6R)-6-(6-aminopurin-9-yl)-7-[tert-butyl(dimethyl)silyl]oxy-2,5-dioxabicyclo[2.2.1]heptan-4-yl]methyl]hydroxylamine (10):** To a solution of **9** (1.0 g, 1.86 mmol) in DCM (10 mL) at 0 °C, *N*-



methylhydrazine (83.47 mg, 1.86 mmol, 95.39  $\mu\text{L}$ ) was added in single portion and stirred for 1 hr. All volatile matters were evaporated to dryness and the crude product was purified by flash column chromatography (gradient: 0-10% MeOH in DCM) to afford **10** (0.61 g, 80% yield) as white solid.  $^1\text{H}$  NMR (400 MHz,  $\text{DMSO-}d_6$ )  $\delta$  8.21 (s, 1H), 8.14 (s, 1H), 7.34 (s, 2H), 6.21 (s, 2H), 5.92 (s, 1H), 4.70 (s, 1H), 4.55 (s, 1H), 4.08 – 3.96 (m, 2H), 3.92 – 3.78 (m, 2H), 0.86 (s, 9H), 0.09 (d,  $J = 2.5$  Hz, 6H) ppm.  $^{13}\text{C}$  NMR (101 MHz,  $\text{DMSO-}d_6$ )  $\delta$  156.1, 152.5, 148.5, 139.0, 119.0, 86.4, 85.5, 78.8, 72.7, 71.9, 71.5, 25.5, 17.6, -4.9, -5.1 ppm. HRMS calcd. for  $\text{C}_{17}\text{H}_{29}\text{N}_6\text{O}_4\text{Si}$   $[\text{M} + \text{H}]^+$  409.2020, found 409.2033.

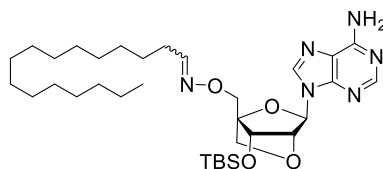

**11**

**9-[(4R,6R)-7-[tert-butyl(dimethyl)silyl]oxy-4-[(hexadecylideneamino)oxymethyl]-2,5-dioxabicyclo[2.2.1]heptan-6-yl]purin-6-amine (11):** To a solution of **10** (0.3 g, 734.35  $\mu\text{mol}$ ) in DCM (10 mL), DIPEA (191.73 mg, 1.47 mmol, 258.40  $\mu\text{L}$ ) was added at 25  $^\circ\text{C}$ . To this reaction mixture, hexadecanal (264.83 mg, 1.10 mmol) was added in single portion and resulting clear solution was stirred for 16 hr. The reaction mixture was diluted with DCM (20 mL), washed with water (10 mL), brine (20 x 2 mL) and organic layer was separated. DCM layer was dried over anhydrous  $\text{Na}_2\text{SO}_4$ , filtered and the filtrate was evaporated to dryness. The crude compound was purified by flash column chromatography (gradient: 10-60% EtOAc in hexane) to afford **11** (0.4 g, 633.98  $\mu\text{mol}$ , 86% yield).  $^1\text{H}$  NMR (400 MHz,  $\text{DMSO-}d_6$ )  $\delta$  8.16 (d,  $J = 11.3$  Hz, 1H), 8.13 (d,  $J = 1.6$  Hz, 1H), 7.43 (t,  $J = 6.0$  Hz, 0.5H), 7.37 – 7.31 (m, 2H), 6.76 (t,  $J = 5.6$  Hz, 0.5H), 5.93 (d,  $J = 1.5$  Hz, 1H), 4.71 (d,  $J = 6.8$  Hz, 1H), 4.58 (d,  $J = 1.6$  Hz, 1H), 4.48 – 4.18 (m, 2H), 3.98 (dd,  $J = 8.0, 1.3$  Hz, 1H), 3.80 (dd,  $J = 7.9, 3.3$  Hz, 1H), 2.24 – 2.05 (m, 2H), 1.38 (dt,  $J = 14.3, 7.3$  Hz, 2H), 1.21 (t,  $J = 6.1$  Hz, 26H), 0.88 – 0.79 (m, 12H), 0.08 (dd,  $J = 2.8, 1.5$  Hz, 6H) ppm.  $^{13}\text{C}$  NMR (126 MHz,  $\text{DMSO-}d_6$ )  $\delta$  156.1, 152.5, 152.5, 152.2, 151.6, 148.4, 148.4, 138.8, 138.6, 119.0, 119.0, 86.5, 86.3, 85.6, 85.5, 78.8, 72.63, 72.4, 71.8, 71.7, 69.1, 68.9, 31.3, 29.0, 29.0, 28.9, 28.8, 28.8, 28.7, 28.6, 28.5, 28.3, 25.7, 25.4, 25.3, 25.1, 22.1, 17.6, 13.9, -4.9, -5.0, -5.2, -5.3 ppm. HRMS calcd. for  $\text{C}_{33}\text{H}_{59}\text{N}_6\text{O}_4\text{Si}$   $[\text{M} + \text{H}]^+$  631.4367, found 631.4390.

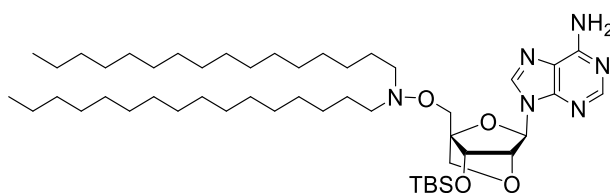

**12**

**9-[(4R,6R)-7-[tert-butyl(dimethyl)silyl]oxy-4-[(dihexadecylamino)oxymethyl]-2,5-dioxabicyclo[2.2.1]heptan-6-yl]purin-6-amine (12):** To a clear solution of **11** (0.25 g, 396.24  $\mu\text{mol}$ ) in acetic acid (7 mL) was added sodium cyanoborohydride (66.06 mg, 1.03 mmol) in single portion and stirred at 15  $^\circ\text{C}$  for 1 hr. Hexadecanal (95.26 mg, 396.24  $\mu\text{mol}$ ) was added to the reaction mixture and stirred further for 1 hr at 20  $^\circ\text{C}$ . Finally, second portion of sodium cyanoborohydride (66.06 mg, 1.03 mmol) was added to the resultant turbid mixture and stirred for 2 hr. Diluted the mixture with DCM (20 mL) and organic layer was washed with water (2 x 30 mL). DCM layer dried over anhydrous  $\text{Na}_2\text{SO}_4$ , filtered and the filtrate was evaporated to dryness. The crude residue was purified by flash column chromatography to afford **12** (0.15 g, 44% yield).  $^1\text{H}$  NMR (500 MHz,  $\text{CDCl}_3$ )  $\delta$  8.30 (s, 1H), 8.03 (s, 1H), 6.29 (s, 2H), 5.95 (s, 1H), 4.68 (s, 1H), 4.32 (s, 1H), 4.11 – 4.04 (m, 2H), 4.03 – 3.90 (m, 2H), 2.66 (hept,  $J = 6.4$  Hz, 4H), 1.54 (p,  $J = 7.3$  Hz, 4H), 1.32 – 1.18 (m, 57H), 0.86 (d,  $J = 2.1$  Hz, 16H), 0.04 (d,  $J = 12.4$  Hz, 6H) ppm.  $^{13}\text{C}$  NMR (126 MHz,  $\text{CDCl}_3$ )  $\delta$  155.8, 153.0, 148.8, 138.8, 120.0,

87.0, 86.8, 79.1, 72.7, 72.3, 69.3, 59.4, 32.0, 29.8, 29.8, 29.8, 29.7, 29.7, 29.5, 27.6, 27.3, 25.7, 22.8, 18.0, 14.2, -4.6, -5.0 ppm. HRMS calcd. for C<sub>49</sub>H<sub>93</sub>N<sub>6</sub>O<sub>4</sub>Si [M + H]<sup>+</sup> 857.7028, found 857.7016.

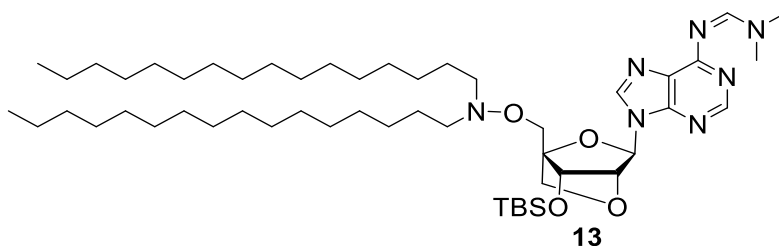

**(Z)-N'-(9-((1R,3R,4R,7S)-7-((tert-butyldimethylsilyl)oxy)-1-(((dihexadecylamino)oxy)methyl)-2,5-dioxabicyclo[2.2.1]heptan-3-yl)-9H-purin-6-yl)-N,N-dimethylformimidamide (13):** To a clear solution of **12** (0.4 g, 466.54 μmol) in dimethylformamide (5 mL) was added *N,N*-dimethylformamide dimethyl acetal (88.71 mg, 699.81 μmol, 99.68 μL) in single portion and the reaction mixture was stirred at 65 °C for 4 hr. TLC was checked, and volatile matters was removed under high vacuum pump. Residue was dissolved in DCM (100 mL) and the organic layer was washed with brine (3 x 50 mL). DCM layer was then dried over anhydrous Na<sub>2</sub>SO<sub>4</sub>, filtered and the filtrate was evaporated to dryness. Crude mass thus obtained, was purified by flash column chromatography (gradient: 30-80% EtOAc in hexane) to afford **13** (0.35 g, 82% yield) as white hygroscopic solid. <sup>1</sup>H NMR (600 MHz, CDCl<sub>3</sub>) δ 8.94 (d, *J* = 2.1 Hz, 1H), 8.51 (s, 1H), 8.13 (s, 1H), 5.99 (s, 1H), 4.64 (s, 1H), 4.30 (s, 1H), 4.09 – 4.04 (m, 2H), 4.03 – 3.98 (m, 1H), 3.93 (dd, *J* = 7.7, 2.0 Hz, 1H), 3.25 (s, 3H), 3.20 (s, 3H), 2.66 (q, *J* = 6.7 Hz, 4H), 1.54 (t, *J* = 7.4 Hz, 4H), 1.23 (d, *J* = 5.0 Hz, 51H), 0.85 (dd, *J* = 8.7, 2.1 Hz, 14H), 0.00 (d, *J* = 9.1 Hz, 6H) ppm. <sup>13</sup>C NMR (151 MHz, CDCl<sub>3</sub>) δ 159.7, 158.1, 152.8, 150.5, 139.8, 126.6, 86.9, 86.7, 79.1, 72.7, 72.1, 69.1, 59.5, 41.4, 35.3, 32.0, 29.8, 29.8, 29.8, 29.7, 29.7, 29.7, 29.5, 27.6, 27.3, 25.7, 22.8, 18.0, 14.2, -4.6, -5.0 ppm. HRMS calcd. for C<sub>52</sub>H<sub>98</sub>N<sub>7</sub>O<sub>4</sub>Si [M + H]<sup>+</sup> 912.7450, found 912.7438.

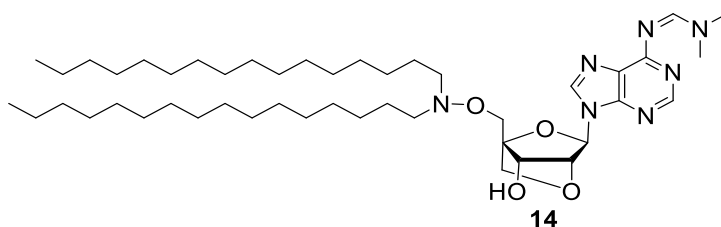

**N'-[9-[(4R,6R)-4-[(dihexadecylamino)oxymethyl]-7-hydroxy-2,5-dioxabicyclo[2.2.1]heptan-6-yl]purin-6-yl]-N,N-dimethyl-formamidine (14):** To a clear solution of **13** (0.43 g, 471.26 μmol) in THF (10 mL) was added TBAF (160.18 mg, 612.63 μmol) in single portion and stirred for 4 hr at 22 °C. All the volatile matters were evaporated under high vacuum pump and the crude residue thus obtained, was purified by flash column chromatography (gradient: 0-5% MeOH in DCM) to afford **14** (0.32 g, 85% yield) as white hygroscopic solid. <sup>1</sup>H NMR (600 MHz, CDCl<sub>3</sub>) δ 8.93 (s, 1H), 8.49 (s, 1H), 8.08 (s, 1H), 6.06 (s, 1H), 4.64 (s, 1H), 4.40 (d, *J* = 3.1 Hz, 1H), 4.18 – 4.13 (m, 3H), 4.01 (d, *J* = 8.1 Hz, 1H), 3.87 (d, *J* = 4.5 Hz, 1H), 3.26 (s, 3H), 3.21 (s, 3H), 2.71 (hept, *J* = 6.4 Hz, 4H), 1.56 (p, *J* = 7.4 Hz, 4H), 1.36 – 1.20 (m, 53H), 0.88 (t, *J* = 7.0 Hz, 6H) ppm. <sup>13</sup>C NMR (151 MHz, CDCl<sub>3</sub>) δ 159.5, 158.2, 152.9, 150.6, 139.1, 126.5, 86.8, 86.4, 79.6, 72.2, 71.9, 68.8, 58.9, 41.6, 35.4, 32.1, 29.9, 29.8, 29.8, 29.8, 29.7, 29.5, 27.6, 27.1, 22.8, 14.3 ppm. HRMS calcd. for C<sub>46</sub>H<sub>84</sub>N<sub>7</sub>O<sub>4</sub> [M + H]<sup>+</sup> 798.6585, found 798.6596.

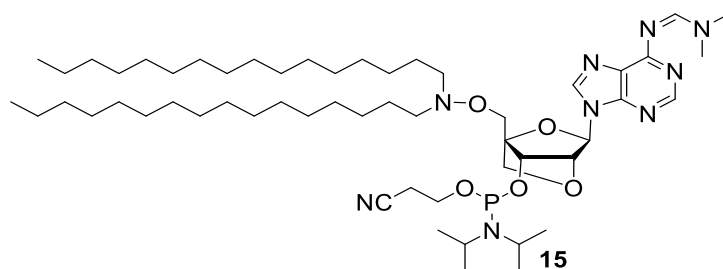

***N'*-[9-[(4*R*,6*R*)-7-[2-cyanoethoxy-(diisopropylamino)phosphanyl]oxy-4-[(dihexadecylamino)oxy methyl]-2,5-dioxabicyclo[2.2.1]heptan-6-yl]purin-6-yl]-*N,N*-dimethyl-formamidine (15):** To a clear solution of **14** (0.289 g, 362.07  $\mu\text{mol}$ ) in DCM (10 mL) was added NMI (44.59 mg, 543.10  $\mu\text{mol}$ , 43.29  $\mu\text{L}$ ) and DIPEA (233.97 mg, 1.81 mmol, 315.32  $\mu\text{L}$ ) in single portions. After stirring the reaction mixture for 5 minutes at 22 °C, 2-cyanoethyl-*N,N*-diisopropylchlorophosphoramidite (171.39 mg, 724.14  $\mu\text{mol}$ , 161.69  $\mu\text{L}$ ) was added and continued stirring for 1 hr and TLC was checked. Starting material was consumed and reaction mixture was diluted with DCM (15 mL). DCM layer was washed with 10%  $\text{NaHCO}_3$  (2 x 25 mL) solution, and brine (30 mL). Organic layer was separated, dried over anhydrous  $\text{Na}_2\text{SO}_4$ , filtered and filtrate was evaporated at 36°C to afford crude compound which was purified by flash column chromatography (60-90% EtOAc in hexane) to afford **15** (0.3 g, 83% yield) as transparent gum.  $^1\text{H}$  NMR (600 MHz,  $\text{CD}_3\text{CN}$ )  $\delta$  8.93 (s, 1H), 8.42 (d,  $J = 4.5$  Hz, 1H), 8.09 (d,  $J = 7.0$  Hz, 1H), 6.35 (s, 0H), 6.00 (d,  $J = 4.8$  Hz, 1H), 4.79 – 4.54 (m, 1H), 4.48 – 4.32 (m, 1H), 4.13 – 4.00 (m, 6H), 3.83 – 3.70 (m, 3H), 3.63 – 3.43 (m, 4H), 3.19 (s, 4H), 2.76 (t,  $J = 6.0$  Hz, 2H), 2.73 – 2.62 (m, 5H), 1.61 – 1.50 (m, 5H), 1.39 – 1.09 (m, 81H), 1.07 – 0.98 (m, 7H), 0.88 (t,  $J = 7.0$  Hz, 6H) ppm.  $^{13}\text{C}$  NMR (151 MHz,  $\text{CD}_3\text{CN}$ )  $\delta$  171.4, 160.4, 159.0, 159.0, 153.2, 151.5, 151.5, 139.7, 139.7, 127.1, 127.1, 119.2, 118.9, 118.7, 87.3, 87.3, 87.3, 87.2, 87.1, 73.3, 73.1, 73.1, 72.5, 72.4, 69.7, 69.6, 60.8, 59.8, 59.7, 59.6, 59.4, 59.4, 59.3, 59.2, 59.0, 59.0, 55.1, 45.8, 45.8, 43.8, 43.9, 43.9, 43.9, 43.8, 43.8, 41.5, 35.2, 32.5, 30.3, 30.3, 30.2, 30.2, 30.2, 30.1, 30.1, 30.0, 28.0, 28.0, 27.7, 27.7, 24.8, 24.8, 24.8, 24.8, 24.7, 24.6, 24.5, 23.3, 23.1, 23.1, 23.1, 23.1, 21.1, 20.9, 20.9, 20.8, 20.8, 20.8, 20.5, 20.5, 14.5, 14.4 ppm.  $^{31}\text{P}$  NMR (243 MHz,  $\text{CD}_3\text{CN}$ )  $\delta$  148.5, 148.4 ppm. HRMS calcd. for  $\text{C}_{55}\text{H}_{101}\text{N}_9\text{O}_5\text{P}$   $[\text{M} + \text{H}]^+$  998.7663, found 998.7681.

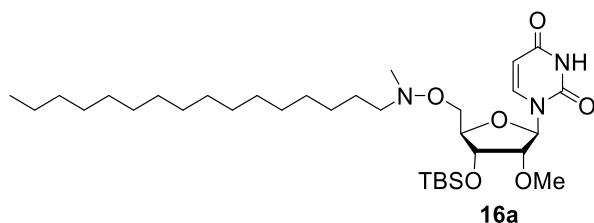

***1*-((2*R*,3*R*,4*R*,5*R*)-4-((*tert*-butyldimethylsilyl)oxy)-5-(((hexadecyl(methyl)amino)oxy)methyl)-3-methoxytetrahydrofuran-2-yl)pyrimidine-2,4(1*H*,3*H*)-dione (16a):** To a solution of compound **4c** (2.00 g, 3.28 mmol) in AcOH (8 mL) was added  $\text{NaCNBH}_3$  (247 mg, 3.94 mmol) under 15 °C. The reaction mixture was stirred for 1 hr at 15 °C and to the cold 30% formaldehyde solution (1.64 mL) was added. The stirring was continued for 30 min. and additional amount of  $\text{NaCNBH}_3$  (2.47 mg, 3.94 mmol) was added in a similar manner. The resulting mixture was stirred for another 2 hr and then diluted with DCM and washed with ice water. The organic layer was separated and concentrated. The crude material was purified by flash column chromatography (75% hexane in AcOEt) to give compound **16a** (1.89 g, 92%).  $^1\text{H}$  NMR (400 MHz,  $\text{DMSO}-d_6$ ):  $\delta$  11.35 (brs, 1 H), 7.74 (d,  $J = 4.4$  Hz, 1 H), 7.77 (d,  $J = 3.6$  Hz, 1 H), 5.60 (dd,  $J = 8.0, 2.0$  Hz, 1 H), 4.14 (dd,  $J = 5.6, 5.2$  Hz, 1 H), 3.95 – 3.70 (m, 4 H), 3.33 (s, 5 H), 2.49 (s, 3 H), 1.49 – 1.38 (m, 2 H), 1.31 – 1.13 (m, 26 H), 0.87 – 0.79 (m, 12 H), 0.06 (s, 6 H).  $^{13}\text{C}$  NMR (101 MHz,  $\text{DMSO}-d_6$ ):  $\delta$  163.0, 150.3, 140.1, 101.6, 86.8, 81.9, 70.8, 69.9, 60.3, 57.5, 45.2, 31.3, 29.1, 29.0, 29.0, 29.0, 29.0, 28.7, 26.8, 26.6, 25.5, 22.1, 17.6, 13.8, -4.8, -5.3 ppm. HRMS calcd. for  $\text{C}_{33}\text{H}_{64}\text{N}_3\text{O}_6\text{Si}$   $[\text{M} + \text{H}]^+$  626.4564, found 626.4568.

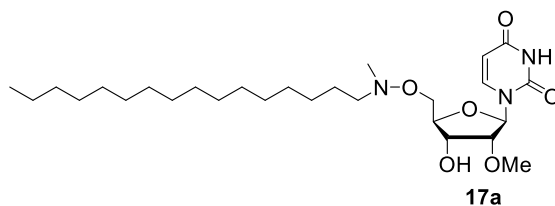

17a

**1-((2R,3R,4R,5R)-5-(((hexadecyl(methyl)amino)oxy)methyl)-4-hydroxy-3-methoxytetrahydrofuran-2-yl)pyrimidine-2,4(1H,3H)-dione (17a):** To a solution of compound **16a** (1.80 g, 2.88 mmol) in anhydrous THF (30 mL) was added 1M TBAF in THF (5.72 mL) at ambient temperature. The reaction mixture was stirred for 30 min. and then diluted with CH<sub>2</sub>Cl<sub>2</sub> and washed with saturated aqueous NH<sub>4</sub>Cl solution. The organic layer was separated, dried over anhydrous Na<sub>2</sub>SO<sub>4</sub>, filtered, and concentrated. The crude material was purified by flash column chromatography (50 % hexane in AcOEt) to give compound **17a** (1.06 g, 72%). <sup>1</sup>H NMR (400 MHz, CDCl<sub>3</sub>) δ 8.94 (s, 1H), 7.94 (d, *J* = 8.2 Hz, 1H), 5.94 (d, *J* = 2.2 Hz, 1H), 5.69 (dd, *J* = 8.2, 2.1 Hz, 1H), 4.19 (ddd, *J* = 8.2, 7.1, 5.2 Hz, 1H), 4.12 (dd, *J* = 11.0, 2.4 Hz, 1H), 4.06 (dt, *J* = 7.1, 2.6 Hz, 1H), 3.92 (dd, *J* = 11.0, 2.8 Hz, 1H), 3.75 (dd, *J* = 5.2, 2.3 Hz, 1H), 3.61 (s, 3H), 2.73 (d, *J* = 8.1 Hz, 1H), 2.65 (d, *J* = 7.6 Hz, 2H), 2.61 (s, 3H), 1.53 (p, *J* = 7.3 Hz, 2H), 1.25 (s, 26H), 0.92 – 0.83 (m, 3H). ppm. <sup>13</sup>C NMR (101 MHz, CDCl<sub>3</sub>) δ 163.2, 150.2, 140.1, 102.0, 87.5, 83.9, 83.1, 70.4, 68.8, 61.4, 58.8, 45.8, 32.1, 29.8, 29.8, 29.8, 29.7, 29.7, 29.5, 27.6, 27.4, 22.8, 14.3 ppm. HRMS calcd. for C<sub>27</sub>H<sub>50</sub>N<sub>3</sub>O<sub>6</sub> [M + H]<sup>+</sup> 512.3700, found 512.3694.

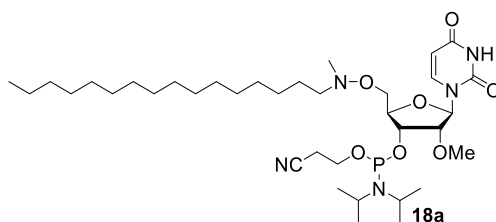

18a

**2-cyanoethyl-((2R,3R,4R,5R)-5-(2,4-dioxo-3,4-dihydropyrimidin-1(2H)-yl)-2-(((hexadecyl(methyl)amino)oxy)methyl)-4-methoxytetrahydrofuran-3-yl)diisopropylphosphoramidite (18a):** To a solution of compound **17a** (1.06 g, 2.07 mmol) in anhydrous DCM (20 mL) were added DIPEA (1.05 mL, 6.21 mmol) and 2-cyanoethylchloro-*N,N*-diisopropylphosphoramidite (509 μL, 2.28 mmol) dropwisely. The reaction mixture was stirred for 3 hr at room temperature and then diluted with DCM. Quenched the reaction with saturated aq. NaHCO<sub>3</sub>. Organic layer was separated and washed with brine. The solvent was removed in vacuo. The crude residue was purified via column chromatography on silica gel (20-60 % EtOAc in hexanes) to afford **18a** as colorless gum (1.26 g, 86%). <sup>1</sup>H NMR (400 MHz, CDCl<sub>3</sub>) δ 8.97 (s, 1H), 7.92 (dd, *J* = 15.3, 8.2 Hz, 1H), 5.97 (d, *J* = 3.8 Hz, 1H), 5.68 (dd, *J* = 8.2, 1.2 Hz, 1H), 4.34 – 4.17 (m, 2H), 4.07 (ddd, *J* = 13.1, 10.9, 2.2 Hz, 1H), 3.96 – 3.69 (m, 4H), 3.64 (dq, *J* = 13.6, 6.9, 3.5 Hz, 2H), 3.51 (d, *J* = 11.6 Hz, 3H), 2.73 – 2.57 (m, 6H), 1.52 (p, *J* = 7.4 Hz, 2H), 1.24 (s, 23H), 1.19 (ddd, *J* = 8.5, 6.7, 2.2 Hz, 12H), 0.87 (t, *J* = 6.7 Hz, 3H) ppm. <sup>13</sup>C NMR (101 MHz, CDCl<sub>3</sub>) δ 163.3, 163.3, 163.3, 150.3, 150.3, 140.2, 140.1, 117.8, 117.6, 102.1, 102.0, 87.8, 87.6, 83.5, 83.5, 83.1, 83.0, 82.4, 82.3, 82.2, 82.1, 77.5, 76.8, 70.6, 70.5, 70.2, 70.1, 61.4, 61.3, 58.9, 58.8, 58.8, 58.7, 58.4, 58.3, 58.2, 58.0, 45.8, 45.7, 43.5, 43.5, 43.4, 43.4, 32.0, 29.8, 29.8, 29.8, 29.7, 29.7, 29.5, 27.6, 27.6, 27.4, 24.8, 24.8, 24.8, 24.7, 24.7, 24.7, 22.8, 20.6, 20.5, 20.5, 20.5, 14.2 ppm. <sup>31</sup>P NMR (162 MHz, CDCl<sub>3</sub>) δ 151.6, 151.4 ppm. HRMS calcd. for C<sub>36</sub>H<sub>67</sub>N<sub>5</sub>O<sub>7</sub>P [M + H]<sup>+</sup> 712.4778, found 712.4769.

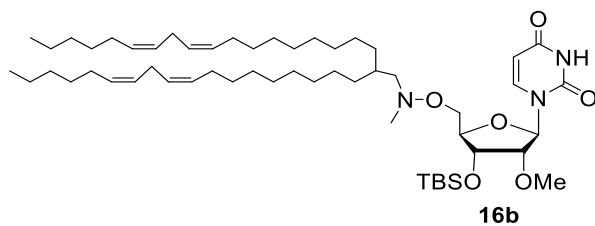

**1-[(2R,5R)-4-[tert-butyl(dimethyl)silyloxy]-3-methoxy-5-[[methyl-[(11Z,14Z)-2-[(9Z,12Z)-octadeca-9,12-dienyl]icosa-11,14-dienyl]amino]oxymethyl]tetrahydrofuran-2-yl]pyrimidine-2,4-dione (16b):** To a clear solution of **4d** (0.7 g, 768.87  $\mu\text{mol}$ ) in glacial acetic acid (4 mL) at 15 °C was added sodium cyanoborohydride (128.18 mg, 2.00 mmol) in single portion and stirred for 1 hr. To this resulting reaction mixture, formaldehyde, 37% in aq. soln., (69.27 mg, 2.31 mmol, 64.14  $\mu\text{L}$ ) in DCM (1 mL) was added slowly and stirred for 0.5 hr. To this mixture was added sodium cyanoborohydride (128.18 mg, 2.00 mmol) and stirred for 2.5 hr at 15 °C. Reaction mixture was diluted with DCM (10 mL) and washed with brine (30 mL). Organic layer separated, dried over anhydrous  $\text{Na}_2\text{SO}_4$ , filtered and filtrate was evaporated to dryness. The crude residue thus obtained, was purified by flash column chromatography (gradient: 10-40% EtOAc in hexane) to afford **16b** (0.46 g, 65% yield) as transparent gum.  $^1\text{H}$  NMR (400 MHz,  $\text{CDCl}_3$ )  $\delta$  9.07 (d,  $J = 2.2$  Hz, 1H), 7.99 (d,  $J = 8.1$  Hz, 1H), 5.90 (d,  $J = 2.3$  Hz, 1H), 5.68 (dd,  $J = 8.1, 2.1$  Hz, 1H), 5.44 – 5.27 (m, 8H), 4.16 – 4.03 (m, 3H), 3.85 (dd,  $J = 10.9, 2.3$  Hz, 1H), 3.60 (dd,  $J = 4.6, 2.3$  Hz, 1H), 3.53 (s, 3H), 2.77 (t,  $J = 6.5$  Hz, 4H), 2.58 (s, 3H), 2.51 (s, 2H), 2.05 (q,  $J = 6.8$  Hz, 8H), 1.52 (d,  $J = 7.3$  Hz, 1H), 1.40 – 1.22 (m, 30H), 0.90 (d,  $J = 8.3$  Hz, 15H), 0.09 (d,  $J = 4.7$  Hz, 6H) ppm.  $^{13}\text{C}$  NMR (101 MHz,  $\text{CDCl}_3$ )  $\delta$  163.3, 150.2, 140.3, 130.3, 130.3, 130.3, 129.2, 128.3, 128.1, 128.1, 128.1, 125.4, 101.8, 88.0, 84.1, 82.7, 69.8, 69.6, 66.1, 58.4, 46.1, 36.0, 32.3, 32.2, 31.7, 30.3, 29.8, 29.8, 29.7, 29.5, 27.4, 27.3, 26.7, 26.6, 25.8, 25.8, 22.7, 18.2, 14.2, -4.4, -4.7 ppm. HRMS calcd. for  $\text{C}_{55}\text{H}_{100}\text{N}_3\text{O}_6\text{Si}$  [ $\text{M} + \text{H}$ ] $^+$  926.7381, found 926.7360.

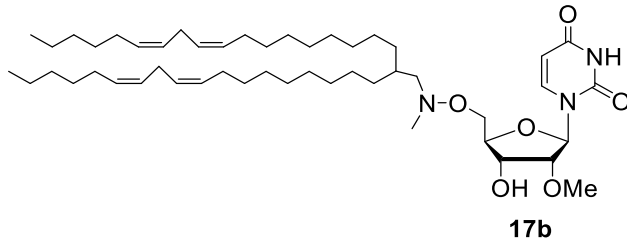

**1-[(2R,5R)-4-hydroxy-3-methoxy-5-[[methyl-[(11Z,14Z)-2-[(9Z,12Z)-octadeca-9,12-dienyl]icosa-11,14-dienyl]amino]oxymethyl]tetrahydrofuran-2-yl]pyrimidine-2,4-dione (17b):** To a solution of **16b** (0.42 g, 453.33  $\mu\text{mol}$ ) in THF (10 mL) at 25 °C, tetrabutylammonium fluoride, 1M in THF (119.73 mg, 453.33  $\mu\text{mol}$ ) was added slowly in single portion and then stirred for 12 hr. Volatile matters were removed in high vacuum pump and crude residue thus obtained was purified by flash column chromatography (gradient: 10-60% EtOAc in hexane) to afford **17b** (0.3 g, 81% yield).  $^1\text{H}$  NMR (400 MHz,  $\text{CDCl}_3$ )  $\delta$  8.99 (d,  $J = 2.2$  Hz, 1H), 7.95 (d,  $J = 8.1$  Hz, 1H), 5.95 (d,  $J = 2.3$  Hz, 1H), 5.70 (dd,  $J = 8.1, 2.2$  Hz, 1H), 5.44 – 5.27 (m, 8H), 4.18 (ddd,  $J = 8.1, 7.0, 5.2$  Hz, 1H), 4.11 (dd,  $J = 11.0, 2.3$  Hz, 1H), 4.05 (dt,  $J = 7.1, 2.5$  Hz, 1H), 3.90 (dd,  $J = 11.1, 2.7$  Hz, 1H), 3.74 (dd,  $J = 5.2, 2.3$  Hz, 1H), 3.61 (s, 3H), 2.77 (t,  $J = 6.7$  Hz, 4H), 2.67 (d,  $J = 8.1$  Hz, 1H), 2.60 (s, 3H), 2.52 (d,  $J = 6.6$  Hz, 2H), 2.05 (q,  $J = 6.8$  Hz, 8H), 1.53 (s, 2H), 1.43 – 1.23 (m, 39H), 0.95 – 0.84 (m, 6H) ppm.  $^{13}\text{C}$  NMR (101 MHz,  $\text{CDCl}_3$ )  $\delta$  163.2, 150.2, 140.1, 130.3, 130.3, 130.3, 128.1, 128.1, 128.1, 102.0, 87.4, 83.9, 83.1, 70.1, 68.8, 66.0, 58.8, 46.1, 35.9, 32.4, 32.2, 31.7, 30.3, 30.3, 29.8, 29.8, 29.7, 29.5, 29.5, 27.4, 27.3, 26.7, 26.6, 25.8, 22.7, 14.2 ppm. HRMS calcd. for  $\text{C}_{49}\text{H}_{86}\text{N}_3\text{O}_6$  [ $\text{M} + \text{H}$ ] $^+$  812.6517, found 812.6537.

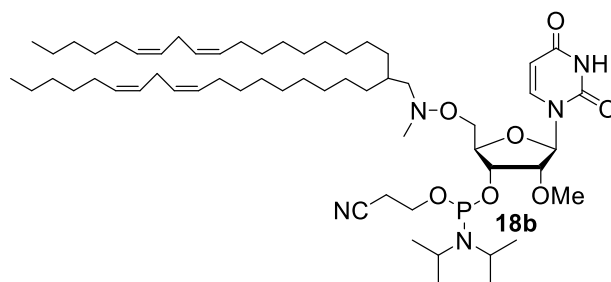

**3-[(diisopropylamino)-[(2R,5R)-5-(2,4-dioxypyrimidin-1-yl)-4-methoxy-2-[[methyl-[(11Z,14Z)-2-[(9Z,12Z)-octadeca-9,12-dienyl]icosa-11,14-dienyl]amino]oxymethyl]tetrahydrofuran-3-yl]oxyphosphanyl]oxypropanenitrile (18b):** To a clear solution of **17b** (0.27 g, 332.43  $\mu\text{mol}$ ) in DCM (10 mL), DIPEA (216.98 mg, 1.66 mmol, 292.43  $\mu\text{L}$ ) and NMI (96.49 mg, 1.16 mmol, 93.68  $\mu\text{L}$ ) were added at 25 °C. To this reaction mixture, 2-cyanoethyl-*N,N*-diisopropylchlorophosphoramidite (165.64 mg, 664.85  $\mu\text{mol}$ , 156.26  $\mu\text{L}$ ) was added slowly after 5 minutes and stirred for 1 hr. Reaction mixture was diluted with DCM (20 mL) and quenched with 10%  $\text{NaHCO}_3$  solution (20 mL). Organic layer was separated, dried on anhydrous  $\text{Na}_2\text{SO}_4$ , filtered and filtrate was evaporated to dryness. The crude compound was thus obtained was purified by flash column chromatography (gradient: 10-50% EtOAc in hexane) to afford **18b** (0.28 g, 83% yield).  $^1\text{H}$  NMR (400 MHz,  $\text{CDCl}_3$ )  $\delta$  8.89 (s, 1H), 7.92 (dd,  $J = 16.6, 8.2$  Hz, 1H), 5.99 (dd,  $J = 4.0, 2.1$  Hz, 1H), 5.69 (dd,  $J = 8.1, 2.0$  Hz, 1H), 5.44 – 5.27 (m, 9H), 4.37 – 4.00 (m, 3H), 3.97 – 3.60 (m, 5H), 3.51 (d,  $J = 9.7$  Hz, 3H), 2.77 (t,  $J = 6.5$  Hz, 4H), 2.70 – 2.50 (m, 7H), 2.04 (dd,  $J = 7.7, 6.0$  Hz, 8H), 1.60 – 1.49 (m, 2H), 1.43 – 1.15 (m, 44H), 0.95 – 0.84 (m, 6H) ppm.  $^{13}\text{C}$  NMR (151 MHz,  $\text{CDCl}_3$ )  $\delta$  163.0, 163.0, 150.2, 150.2, 140.3, 140.1, 130.3, 130.3, 130.3, 130.3, 128.1, 128.1, 128.1, 128.1, 128.0, 117.8, 117.6, 102.1, 102.0, 87.6, 87.4, 83.5, 83.5, 83.0, 83.0, 82.4, 82.4, 82.3, 82.3, 70.8, 70.7, 70.5, 70.3, 70.2, 70.1, 66.0, 58.9, 58.8, 58.8, 58.8, 58.3, 58.3, 58.1, 58.0, 53.6, 46.1, 46.1, 43.5, 43.4, 43.4, 43.4, 43.4, 36.0, 36.0, 32.4, 32.3, 32.2, 32.2, 31.7, 30.4, 30.4, 30.3, 29.8, 29.8, 29.8, 29.8, 29.5, 27.4, 27.3, 26.8, 26.6, 25.8, 24.8, 24.8, 24.8, 24.7, 24.7, 22.7, 20.6, 20.6, 20.5, 20.5, 14.2 ppm.  $^{31}\text{P}$  NMR (162 MHz,  $\text{CDCl}_3$ )  $\delta$  148.6, 148.5 ppm. HRMS calcd. for  $\text{C}_{58}\text{H}_{103}\text{N}_5\text{O}_7\text{P}$  [ $\text{M} + \text{H}$ ] $^+$  1012.7595, found 1012.7560.

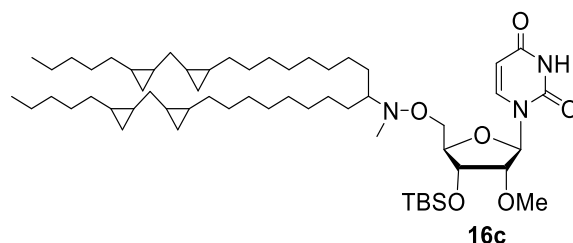

**1-[(2R,5R)-4-[tert-butyl(dimethyl)silyloxy]-3-methoxy-5-[[methyl-[9-[2-[(2-pentylcyclopropyl)methyl]cyclopropyl]-1-[8-[2-[(2-pentylcyclopropyl)methyl]cyclopropyl]octyl]nonyl]amino]oxymethyl]tetrahydrofuran-2-yl]pyrimidine-2,4-dione (16c):** To a clear solution of **4e** (0.56 g, 587.92  $\mu\text{mol}$ ) in glacial acetic acid (10 mL) and DCM (3 mL) at 15 °C was added sodium cyanoborohydride (96.06 mg, 1.53 mmol) in single portion and stirred for 1 hr. To this resulting reaction mixture, formaldehyde, 37% in aq. soln. (190.84 mg, 2.35 mmol, 175.08  $\mu\text{L}$ ) was added slowly and stirred for 1 hr. To this mixture was added sodium cyanoborohydride (96.06 mg, 1.53 mmol) and stirred for 2 hr at 15 °C. Reaction mixture was diluted with DCM (20 mL) and washed with brine (30 mL). Organic layer separated, dried over anhydrous  $\text{Na}_2\text{SO}_4$ , filtered and filtrate was evaporated to dryness. The crude residue thus obtained, was purified by flash column chromatography (gradient: 10-50% EtOAc in hexane) to afford **16c** (0.56 g, 98% yield) as transparent gum.  $^1\text{H}$  NMR (600 MHz,  $\text{CDCl}_3$ )  $\delta$  8.69 (s, 1H), 7.98 (d,  $J = 8.1$  Hz, 1H), 5.93 (d,  $J = 2.5$  Hz, 1H), 5.68 (dd,  $J = 8.2, 2.0$  Hz, 1H), 4.17 – 4.07 (m, 2H), 4.04 (dd,  $J = 11.1, 2.4$  Hz, 1H), 3.81 (dd,  $J = 11.1, 2.5$  Hz, 1H), 3.59 (dd,  $J = 4.8, 2.5$  Hz, 1H), 3.52 (s, 3H), 2.57 (s, 4H), 1.56 – 1.45 (m, 2H), 1.46 – 1.23 (m, 50H), 1.21 – 1.07 (m, 3H), 1.03 (dt,  $J = 14.1, 7.9$  Hz, 1H), 0.91 (s, 10H), 0.88 (d,  $J = 7.1$  Hz, 3H), 0.78 (dtd,  $J =$

15.5, 7.8, 2.2 Hz, 4H), 0.69 (dq,  $J = 15.0, 7.0, 3.9$  Hz, 4H), 0.61 (td,  $J = 8.4, 4.2$  Hz, 4H), 0.10 (d,  $J = 7.0$  Hz, 6H), -0.23 – -0.32 (m, 4H) ppm.  $^{13}\text{C}$  NMR (151 MHz,  $\text{CDCl}_3$ )  $\delta$  163.2, 150.1, 140.3, 101.9, 87.8, 84.2, 82.8, 69.9, 69.6, 66.7, 58.3, 40.2, 32.0, 30.4, 30.2, 30.2, 30.1, 30.0, 29.9, 29.9, 29.9, 29.8, 29.1, 29.0, 28.9, 28.9, 28.2, 28.0, 27.0, 26.9, 25.8, 22.9, 18.2, 16.2, 16.1, 16.1, 15.8, 15.8, 14.3, 11.2, 11.0, -4.40 -4.7 ppm. HRMS calcd. for  $\text{C}_{58}\text{H}_{106}\text{N}_3\text{O}_6\text{Si}$   $[\text{M} + \text{H}]^+$  968.7851, found 968.7839.

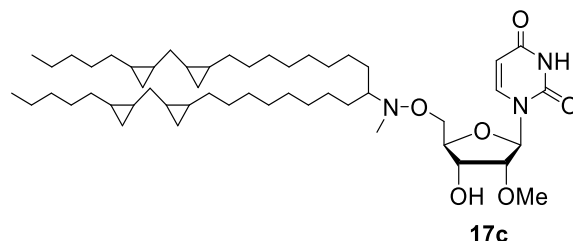

**1-[(2R,5R)-4-hydroxy-3-methoxy-5-[[methyl-[9-[2-[(2-pentylcyclopropyl)methyl]cyclopropyl]-1-[8-[2-[(2-pentylcyclopropyl)methyl]cyclopropyl]octyl]nonyl]amino]oxymethyl]tetrahydrofuran-2-yl]pyrimidine-2,4-dione (17c):** To a clear solution of **16c** (0.55 g, 567.86  $\mu\text{mol}$ ) in THF (20 mL) at 22  $^\circ\text{C}$ , tetrabutylammonium fluoride, 1M in THF (193.01 mg, 738.22  $\mu\text{mol}$ ) was added slowly in single portion and then stirred for 3 hr. All the volatile matters were removed under high vacuum pump and the residue thus obtained was purified by flash column chromatography (gradient: 20-50% EtOAc in hexane) to afford **17c** (0.4 g, 82% yield) as white semi-solid.  $^1\text{H}$  NMR (600 MHz,  $\text{CDCl}_3$ )  $\delta$  8.50 (s, 1H), 7.96 (d,  $J = 8.2$  Hz, 1H), 5.96 (d,  $J = 2.3$  Hz, 1H), 5.69 (dd,  $J = 8.2, 2.2$  Hz, 1H), 4.19 (td,  $J = 7.5, 5.2$  Hz, 1H), 4.10 (dd,  $J = 11.1, 2.3$  Hz, 1H), 4.05 (dt,  $J = 7.0, 2.4$  Hz, 1H), 3.86 (dd,  $J = 11.2, 2.5$  Hz, 1H), 3.73 (dd,  $J = 5.2, 2.3$  Hz, 1H), 3.61 (s, 3H), 2.64 (d,  $J = 8.1$  Hz, 1H), 2.58 (s, 3H), 2.54 (q,  $J = 5.4$  Hz, 1H), 1.50 (tt,  $J = 14.1, 5.9$  Hz, 2H), 1.39 (ddq,  $J = 9.1, 6.4, 3.4$  Hz, 11H), 1.37 – 1.24 (m, 38H), 1.03 (dt,  $J = 14.2, 8.0$  Hz, 1H), 0.94 – 0.85 (m, 6H), 0.83 – 0.74 (m, 4H), 0.69 (ptd,  $J = 8.6, 5.3, 3.0$  Hz, 4H), 0.61 (td,  $J = 8.4, 4.1$  Hz, 4H), -0.28 (dq,  $J = 17.1, 5.1$  Hz, 4H) ppm.  $^{13}\text{C}$  NMR (151 MHz,  $\text{CDCl}_3$ )  $\delta$  162.9, 150.1, 140.1, 102.1, 87.2, 84.0, 83.1, 70.1, 68.7, 66.7, 58.8, 40.4, 32.0, 30.4, 30.2, 30.1, 30.0, 29.9, 29.8, 29.0, 29.0, 28.9, 28.9, 28.2, 28.0, 26.9, 26.8, 22.9, 16.2, 16.1, 16.0, 15.8, 15.8, 14.3, 11.2, 11.0 ppm. HRMS calcd. for  $\text{C}_{52}\text{H}_{92}\text{N}_3\text{O}_6$   $[\text{M} + \text{H}]^+$  854.6986, found 854.6977.

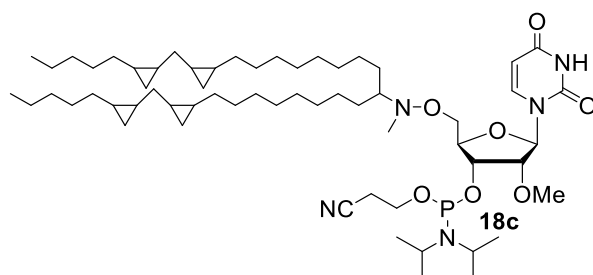

**3-[(diisopropylamino)-[(2R,5R)-5-(2,4-dioxypyrimidin-1-yl)-4-methoxy-2-[[methyl-[9-[2-[(2-pentylcyclopropyl)methyl]cyclopropyl]-1-[8-[2-[(2-pentylcyclopropyl)methyl]cyclopropyl]octyl]nonyl]amino]oxymethyl]tetrahydrofuran-3-yl]oxy-phosphanyl]oxypropanenitrile (18c):** To a clear solution of **17c** (0.4 g, 468.22  $\mu\text{mol}$ ) in DCM (10 mL) was added NMI (57.66 mg, 702.34  $\mu\text{mol}$ , 55.98  $\mu\text{L}$ ) and DIPEA (302.57 mg, 2.34 mmol, 407.77  $\mu\text{L}$ ) in single portions. After stirring the reaction mixture for 5 minutes at 22  $^\circ\text{C}$ , 2-cyanoethyl-*N,N*-diisopropylchlorophosphoramidite (221.64 mg, 936.45  $\mu\text{mol}$ , 209.09  $\mu\text{L}$ ) was added and continued stirring for 1 hr and TLC was checked. Starting material was consumed and reaction mixture was diluted with DCM (15 mL). DCM layer was washed with 10%  $\text{NaHCO}_3$  (2 x 25 mL) solution, and brine (30 mL). Organic layer was separated, dried over anhydrous  $\text{Na}_2\text{SO}_4$ , filtered and filtrate was evaporated at 36  $^\circ\text{C}$  to afford crude compound which was purified by flash chromatography (60-100% EtOAc in hexane) to afford **18c** (0.41 g, 83% yield) as transparent gum.  $^1\text{H}$  NMR (600 MHz,  $\text{CD}_3\text{CN}$ )  $\delta$  9.05 (s, 1H), 7.84 – 7.77 (m, 1H), 5.89 (dd,  $J = 13.3, 4.6$  Hz, 1H), 5.60 (d,  $J = 8.3$  Hz, 1H), 5.43 (s, 3H), 4.39 – 4.09 (m, 2H), 4.05 (q,  $J = 7.2$  Hz, 1H), 3.95

(t,  $J = 9.2$  Hz, 1H), 3.86 – 3.69 (m, 3H), 3.64 (s, 2H), 3.48 – 3.32 (m, 3H), 2.65 (dt,  $J = 13.2, 5.5$  Hz, 2H), 2.55 (d,  $J = 11.8$  Hz, 3H), 1.55 – 1.08 (m, 76H), 1.02 (dt,  $J = 15.0, 8.2$  Hz, 1H), 0.87 (q,  $J = 8.2$  Hz, 6H), 0.77 (dt,  $J = 14.1, 7.0$  Hz, 4H), 0.68 (s, 6H), 0.58 (q,  $J = 7.5$  Hz, 5H), -0.21 – -0.41 (m, 4H) ppm.  $^{13}\text{C}$  NMR (151 MHz,  $\text{CD}_3\text{CN}$ )  $\delta$  171.5, 163.7, 163.7, 151.2, 140.7, 140.7, 119.3, 119.2, 102.7, 102.6, 87.9, 87.5, 83.8, 83.3, 82.8, 71.8, 71.7, 71.4, 71.4, 71.3, 71.2, 67.0, 66.9, 60.8, 59.6, 59.5, 59.0, 59.0, 58.9, 58.9, 58.5, 58.5, 55.1, 44.0, 43.9, 43.9, 43.8, 40.4, 40.3, 32.5, 30.8, 30.5, 30.5, 30.5, 30.4, 30.2, 30.2, 30.2, 29.5, 29.3, 28.5, 28.4, 27.4, 27.3, 27.2, 25.0, 25.0, 24.9, 24.9, 24.8, 24.8, 23.3, 21.1, 21.0, 20.9, 20.9, 16.7, 16.6, 16.6, 16.3, 14.5, 14.4, 11.5, 11.4, 11.3 ppm.  $^{31}\text{P}$  NMR (243 MHz,  $\text{CD}_3\text{CN}$ )  $\delta$  150.0 ppm. HRMS calcd. for  $\text{C}_{61}\text{H}_{109}\text{N}_5\text{O}_7\text{P}$  [ $\text{M} + \text{H}$ ] $^+$  1054.8065, found 1054.8014.

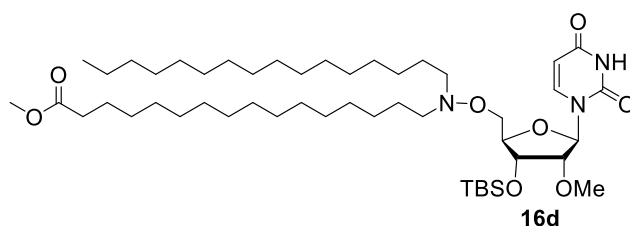

**Methyl-16-[[[(2R,5R)-3-[tert-butyl(dimethyl)silyl]oxy-5-(2,4-dioxypyrimidin-1-yl)-4-methoxy-tetrahydrofuran-2-yl]methoxy-hexadecyl-amino]hexadecanoate (16d)**: To a clear solution of **4c** (1.5 g, 2.46 mmol) in dry DCM (20 mL) and acetic acid (10 mL) was added sodium cyanoborohydride (410.02 mg, 6.39 mmol) in single portion and the reaction mixture was stirred for 1.5 hr at 15 °C. To the resulting mixture was added methyl 16-oxohexadecanoate (1.05 g, 3.69 mmol) and stirring was continued for 1 hr. Reaction was again cooled to 15 °C and sodium cyanoborohydride (410.02 mg, 6.39 mmol) was added. After 2.5 hr TLC showed consumption of starting materials. Reaction mixture was diluted with DCM (25 mL) and quenched with water (30 mL). Layers were separated and aqueous layer was washed with DCM (20 mL). Combined DCM layer was washed with brine (2 x 30 mL). Organic layer was separated, dried over anhydrous  $\text{Na}_2\text{SO}_4$ , filtered and the filtrate was evaporated to dryness. The residue thus obtained was purified flash column chromatography (gradient: 10-40% EtOAc in hexane) to afford **16d** (1.95 g, 90% yield).  $^1\text{H}$  NMR (400 MHz,  $\text{CDCl}_3$ )  $\delta$  8.96 (d,  $J = 2.2$  Hz, 1H), 8.02 (d,  $J = 8.2$  Hz, 1H), 5.92 (d,  $J = 2.3$  Hz, 1H), 5.68 (dd,  $J = 8.2, 2.1$  Hz, 1H), 4.17 (dd,  $J = 6.9, 4.9$  Hz, 1H), 4.12 – 4.03 (m, 2H), 3.92 – 3.82 (m, 1H), 3.67 (s, 6H), 3.65 – 3.59 (m, 1H), 3.53 (s, 3H), 2.73 – 2.62 (m, 4H), 2.30 (t,  $J = 7.6$  Hz, 3H), 1.68 – 1.48 (m, 6H), 1.25 (s, 63H), 0.89 (d,  $J = 12.1$  Hz, 12H), 0.10 (d,  $J = 5.4$  Hz, 6H) ppm.  $^{13}\text{C}$  NMR (101 MHz,  $\text{CDCl}_3$ )  $\delta$  174.5, 163.4, 150.2, 140.3, 101.7, 87.8, 84.0, 82.9, 71.2, 69.6, 63.2, 59.3, 58.3, 51.6, 34.2, 32.9, 32.1, 29.8, 29.8, 29.8, 29.7, 29.7, 29.7, 29.6, 29.6, 29.5, 29.4, 29.3, 27.6, 27.2, 25.9, 25.8, 25.1, 22.8, 18.2, 14.3, -4.4, -4.7 ppm. HRMS calcd. for  $\text{C}_{49}\text{H}_{94}\text{N}_3\text{O}_8\text{Si}$  [ $\text{M} + \text{H}$ ] $^+$  880.6810, found 880.6799.

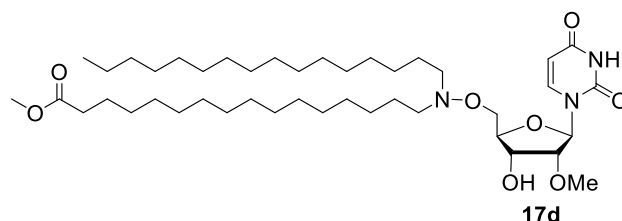

**Methyl-16-(((2R,3R,4R,5R)-3-((tert-butyl)dimethylsilyl)oxy)-5-(2,4-dioxo-3,4-dihydropyrimidin-1(2H)-yl)-4-methoxytetrahydrofuran-2-yl)methoxy)(hexadecyl)amino]hexadecanoate (17d)**: To a clear solution of **16d** (1.9 g, 2.16 mmol) in THF (30 mL) at 22 °C, tetrabutylammonium fluoride (733.57 mg, 2.81 mmol) was added slowly in single portion and then stirred for 4 hr. All the volatile matters were removed under high vacuum pump and the residue thus obtained was purified by flash column chromatography (gradient: 20-60% EtOAc in hexane) to afford **17d** (1.35 g, 82% yield) as white semi-solid.  $^1\text{H}$  NMR (600 MHz,  $\text{CDCl}_3$ )  $\delta$  8.76 (s, 1H), 8.00 (dd,  $J = 8.4, 2.1$  Hz, 1H), 5.95 (d,  $J = 2.5$  Hz, 1H), 5.71 – 5.65 (m, 1H), 4.22 (q,  $J = 6.8$  Hz, 1H), 4.13 (dd,  $J = 11.1, 2.5$  Hz, 1H), 4.03



(dd,  $J = 7.2, 2.5$  Hz, 1H), 3.93 (dd,  $J = 11.1, 2.6$  Hz, 1H), 3.74 (dd,  $J = 5.2, 2.5$  Hz, 1H), 3.67 (d,  $J = 2.1$  Hz, 3H), 3.61 (d  $J = 2.1$  Hz, 3H), 2.67 (q,  $J = 7.2$  Hz, 5H), 2.30 (td,  $J = 7.6, 2.2$  Hz, 2H), 1.64 – 1.58 (m, 3H), 1.54 (q,  $J = 6.9$  Hz, 5H), 1.35 – 1.22 (m, 43H), 0.88 (td,  $J = 7.1, 2.1$  Hz, 3H) ppm.  $^{13}\text{C}$  NMR (151 MHz,  $\text{CDCl}_3$ )  $\delta$  174.5, 163.1, 150.1, 140.1, 101.9, 87.3, 83.9, 83.2, 71.3, 68.6, 59.5, 58.8, 51.6, 34.3, 32.1, 29.8, 29.8, 29.8, 29.8, 29.8, 29.7, 29.7, 29.6, 29.5, 29.4, 29.3, 27.6, 27.2, 25.1, 22.8, 14.3 ppm. HRMS calcd. for  $\text{C}_{43}\text{H}_{80}\text{N}_3\text{O}_8$   $[\text{M} + \text{H}]^+$  766.5945, found 766.5949.

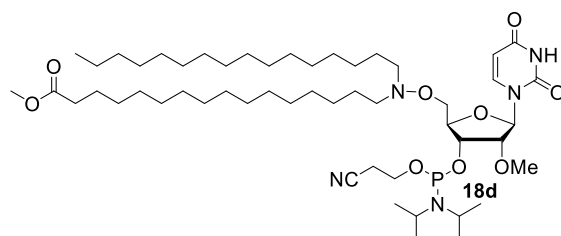

**Methyl-16-[[*(2R,5R)*-3-[2-cyanoethoxy-(*diisopropylamino*)phosphanyl]oxy-5-(2,4-dioxypyrimidin-1-yl)-4-methoxy-tetrahydrofuran-2-yl]methoxy-hexadecyl-amino]hexadecanoate (18d):** To a clear solution of **17d** in DCM (30 mL) was added NMI (208.97 mg, 2.55 mmol, 202.89  $\mu\text{L}$ ) and DIPEA (1.10 g, 8.48 mmol, 1.48 mL) in single portions. After stirring the reaction mixture for 5 minutes at 22  $^\circ\text{C}$ , 2-cyanoethyl-*N,N*-diisopropylchlorophosphoramidite (803.25 mg, 3.39 mmol, 757.78  $\mu\text{L}$ ) was added and continued stirring for 1 hr and TLC was checked. Starting material was consumed and reaction mixture was diluted with DCM (15 mL). DCM layer was washed with 10%  $\text{NaHCO}_3$  (2 x 25 mL) solution, and brine (30 mL). Organic layer was separated, dried over anhydrous  $\text{Na}_2\text{SO}_4$ , filtered and filtrate was evaporated at 36 $^\circ\text{C}$  to afford crude compound which was purified by flash chromatography (60-100% EtOAc in hexane) to afford **18d** (1.31 g, 80% yield) as transparent gum.  $^1\text{H}$  NMR (600 MHz,  $\text{CD}_3\text{CN}$ )  $\delta$  9.06 (s, 1H), 8.22 – 7.45 (m, 1H), 5.88 (dd,  $J = 12.7, 4.4$  Hz, 1H), 5.60 (dd,  $J = 8.1, 1.4$  Hz, 1H), 4.39 – 4.25 (m, 1H), 4.22 – 4.09 (m, 1H), 3.99 (td,  $J = 10.7, 2.6$  Hz, 1H), 3.91 – 3.75 (m, 4H), 3.76 – 3.60 (m, 2H), 3.60 (s, 3H), 3.50 – 3.36 (m, 3H), 2.72 – 2.58 (m, 6H), 2.27 (t,  $J = 7.5$  Hz, 2H), 1.61 – 1.46 (m, 7H), 1.38 – 1.25 (m, 49H), 1.19 (td,  $J = 6.5, 3.1$  Hz, 13H), 0.88 (t,  $J = 7.0$  Hz, 3H) ppm.  $^{13}\text{C}$  NMR (151 MHz,  $\text{CD}_3\text{CN}$ )  $\delta$  174.8, 163.9, 151.4, 141.0, 141.0, 119.5, 119.4, 102.5, 88.2, 87.9, 83.7, 83.7, 83.4, 83.3, 83.2, 83.2, 83.0, 83.0, 72.84, 72.7, 71.8, 71.7, 71.5, 71.4, 61.0, 59.8, 59.7, 59.7, 59.6, 59.3, 59.2, 59.0, 59.0, 58.6, 58.5, 55.3, 51.8, 44.1, 44.1, 44.0, 44.0, 34.5, 32.7, 30.4, 30.4, 30.4, 30.4, 30.3, 30.3, 30.3, 30.3, 30.2, 30.2, 30.1, 30.0, 29.8, 28.2, 28.1, 27.9, 25.7, 25.1, 25.0, 25.0, 24.9, 24.9, 24.9, 23.4, 21.0, 21.0, 14.5, 14.4 ppm.  $^{31}\text{P}$  NMR (243 MHz,  $\text{CD}_3\text{CN}$ )  $\delta$  150.0, 149.8 ppm. HRMS calcd. for  $\text{C}_{52}\text{H}_{97}\text{N}_5\text{O}_9\text{P}$   $[\text{M} + \text{H}]^+$  966.7024, found 966.7043.

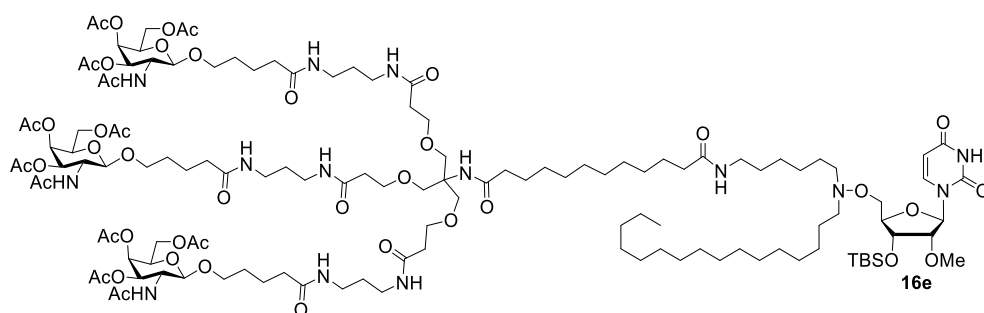

**[(*3R,6R*)-5-acetamido-6-[5-[3-[3-[3-[3-[5-[(*2R,5R*)-3-acetamido-4,5-diacetoxy-6-(acetoxymethyl)tetrahydropyran-2-yl]oxypentanoylamino]propylamino]-3-oxo-propoxy]-2-[[3-[3-[5-[(*2R,5R*)-3-acetamido-4,5-diacetoxy-6-(acetoxymethyl)tetrahydropyran-2-yl]oxypentanoylamino]propylamino]-3-oxo-propoxy]methyl]-2-[[12-[6-[[(*2R,5R*)-3-[*tert*-butyl(*dimethyl*)silyl]oxy-5-(2,4-dioxypyrimidin-1-yl)-4-methoxy-tetrahydrofuran-2-yl]methoxy-hexadecyl-amino]hexylamino]-12-oxo-dodecanoyl]amino]propoxy]propanoylamino]propylamino]-5-oxo-pentoxy]-3,4-diacetoxy-tetrahydropyran-2-yl]methyl acetate (16e):** To a clear solution of **4f** (2.0 g, 808.79  $\mu\text{mol}$ )

in dry DCM (20 mL) and acetic acid (10 mL) was added sodium cyanoborohydride (132.14 mg, 2.10 mmol) in single portion and the reaction mixture was stirred for 1.5 hr at 15 °C. To the resulting mixture was added palmitaldehyde (213.89 mg, 889.67 μmol) and stirring was continued for 1 hr. Reaction was again cooled to 15 °C and sodium cyanoborohydride (132.14 mg, 2.10 mmol) was added. After 2.5 hr TLC showed consumption of starting materials. Reaction mixture was diluted with DCM (25 mL) and quenched with water (30 mL). Layers were separated and aqueous layer was washed with DCM (20 mL). Combined DCM layer was washed with brine (2 x 30 mL). Organic layer was separated, dried over anhydrous Na<sub>2</sub>SO<sub>4</sub>, filtered and the filtrate was evaporated to dryness. The residue thus obtained was purified by flash column chromatography (gradient: 2-20% MeOH in DCM) to afford **16e** (1.52 g, 70% yield) as white foam. <sup>1</sup>H NMR (600 MHz, DMSO-*d*<sub>6</sub>) δ 11.38 (d, *J* = 2.2 Hz, 1H), 7.86 – 7.80 (m, 7H), 7.79 – 7.71 (m, 5H), 7.68 (t, *J* = 5.6 Hz, 1H), 6.98 (s, 1H), 5.79 (d, *J* = 3.9 Hz, 1H), 5.63 (dd, *J* = 8.1, 2.2 Hz, 1H), 5.21 (d, *J* = 3.4 Hz, 4H), 4.96 (dd, *J* = 11.3, 3.4 Hz, 3H), 4.48 (d, *J* = 8.5 Hz, 4H), 4.16 (t, *J* = 5.5 Hz, 1H), 4.09 (q, *J* = 5.2 Hz, 1H), 4.02 (h, *J* = 4.3 Hz, 11H), 3.92 (td, *J* = 5.1, 3.0 Hz, 1H), 3.90 – 3.82 (m, 5H), 3.78 (dd, *J* = 11.0, 4.8 Hz, 1H), 3.70 (dt, *J* = 9.7, 5.9 Hz, 4H), 3.53 (dd, *J* = 12.1, 5.7 Hz, 15H), 3.40 (dt, *J* = 9.8, 6.3 Hz, 4H), 3.35 (s, 3H), 3.17 (d, *J* = 5.2 Hz, 2H), 3.02 (tt, *J* = 13.0, 6.5 Hz, 17H), 2.65 – 2.59 (m, 5H), 2.27 (t, *J* = 6.4 Hz, 8H), 2.10 (s, 9H), 2.04 (t, *J* = 7.3 Hz, 9H), 1.99 (s, 9H), 1.89 (s, 9H), 1.77 (s, 11H), 1.53 – 1.40 (m, 29H), 1.31 – 1.19 (m, 40H), 0.86 (d, *J* = 13.4 Hz, 12H), 0.08 (d, *J* = 1.0 Hz, 6H) ppm. <sup>13</sup>C NMR (151 MHz, DMSO-*d*<sub>6</sub>) δ 172.5, 171.9, 171.9, 170.1, 170.0, 169.9, 169.6, 169.3, 163.1, 150.3, 140.2, 101.6, 101.0, 95.4, 86.9, 82.1, 81.8, 72.2, 70.5, 69.9, 69.8, 68.7, 68.2, 67.3, 66.7, 61.4, 59.5, 58.5, 58.4, 57.5, 49.3, 48.6, 38.3, 36.4, 36.3, 36.0, 35.9, 35.4, 35.0, 31.3, 29.3, 29.1, 29.0, 29.0, 29.0, 28.9, 28.9, 28.9, 28.9, 28.8, 28.7, 28.7, 28.7, 28.6, 26.8, 26.6, 26.5, 26.5, 26.4, 25.6, 25.4, 25.3, 22.8, 22.1, 21.8, 20.5, 20.5, 20.4, 17.7, 14.0, -4.7, -5.1 ppm. MALDI calcd. for C<sub>129</sub>H<sub>220</sub>N<sub>14</sub>O<sub>44</sub>SiNa [M + Na]<sup>+</sup> 2722.31; found 2725.66.

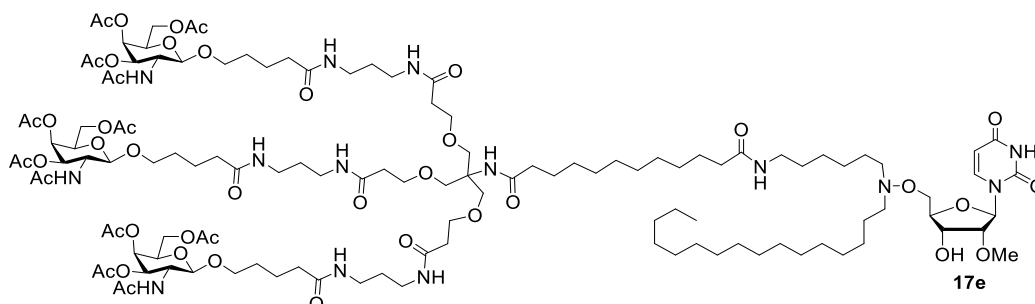

**[(3R,6R)-5-acetamido-6-[5-[3-[3-[3-[3-[3-[5-[(2R,5R)-3-acetamido-4,5-diacetoxy-6-(acetoxymethyl)tetrahydropyran-2-yl]oxypentanoylamino]propylamino]-3-oxo-propoxy]-2-[[3-[3-[5-[(2R,5R)-3-acetamido-4,5-diacetoxy-6-(acetoxymethyl)tetrahydropyran-2-yl]oxypentanoylamino]propylamino]-3-oxo-propoxy]methyl]-2-[[12-[6-[[[(2R,5R)-5-(2,4-dioxypyrimidin-1-yl)-3-hydroxy-4-methoxy-tetrahydrofuran-2-yl]methoxy-hexadecyl-amino]hexylamino]-12-oxo-dodecanoyl]amino]propoxy]propanoylamino]propylamino]-5-oxo-pentoxyl]-3,4-diacetoxy-tetrahydropyran-2-yl]methyl acetate (17e):** To a clear solution of **16e** (1.5 g, 555.71 μmol) in THF (25 mL) was added TBAF (188.88 mg, 722.42 μmol) in single portion and stirred for 12 hr at 22 °C. All the volatile matters were evaporated under high vacuum pump and the crude residue thus obtained, was purified by flash column chromatography (gradient: 5-20% MeOH in DCM) to afford **17e** (1.21 g, 84% yield) as white foam. <sup>1</sup>H NMR (600 MHz, CD<sub>3</sub>CN) δ 9.52 (s, 1H), 7.83 (d, *J* = 8.2 Hz, 1H), 7.17 (t, *J* = 6.0 Hz, 2H), 6.99 (t, *J* = 5.9 Hz, 2H), 6.91 (d, *J* = 9.4 Hz, 2H), 6.64 (d, *J* = 6.5 Hz, 2H), 5.85 (d, *J* = 3.7 Hz, 1H), 5.61 (d, *J* = 8.2 Hz, 1H), 5.28 (dd, *J* = 3.5, 1.1 Hz, 3H), 5.03 (dd, *J* = 11.3, 3.4 Hz, 3H), 4.54 (d, *J* = 8.5 Hz, 3H), 4.15 (t, *J* = 5.3 Hz, 1H), 4.11 (dd, *J* = 11.3, 6.8 Hz, 3H), 4.05 (dd, *J* = 11.3, 6.1 Hz, 3H), 4.01 – 3.91 (m, 8H), 3.86 – 3.76 (m, 5H), 3.62 (d, *J* = 5.0 Hz, 13H), 3.52 – 3.44 (m, 6H), 3.18 (dq, *J* = 12.4, 6.5 Hz, 14H), 3.11 (q, *J* = 6.6 Hz, 2H), 2.69 – 2.64 (m, 3H), 2.34 (t, *J* = 5.9 Hz, 7H), 2.14 (td, *J* = 7.3, 1.8 Hz, 6H), 2.10 (s, 11H), 1.98 (s, 9H), 1.91 (s, 9H), 1.85 (s, 10H), 1.60 (p, *J* = 7.3 Hz, 13H), 1.55 – 1.48 (m, 13H), 1.44 (p, *J* = 6.9 Hz, 1H), 1.38 – 1.24 (m, 33H) ppm.

$^{13}\text{C}$  NMR (151 MHz,  $\text{CD}_3\text{CN}$ )  $\delta$  174.5, 174.0, 174.0, 174.0, 174.0, 172.4, 172.4, 172.4, 171.4, 171.3, 171.3, 171.3, 171.2, 171.0, 164.1, 151.4, 141.2, 102.4, 102.2, 96.6, 88.1, 84.1, 83.8, 73.1, 71.6, 71.4, 70.1, 70.0, 69.9, 68.4, 67.9, 62.5, 62.5, 60.7, 59.9, 59.8, 58.8, 51.1, 39.7, 37.5, 37.5, 37.2, 37.1, 36.9, 36.5, 32.6, 30.4, 30.4, 30.4, 30.4, 30.4, 30.3, 30.3, 30.2, 30.2, 30.1, 30.1, 30.1, 30.0, 30.0, 29.8, 29.8, 29.8, 29.8, 29.5, 28.1, 27.8, 27.8, 27.7, 27.4, 26.6, 26.6, 24.3, 23.4, 23.2, 20.9, 20.9, 14.4, 13.8 ppm. MALDI calcd. for  $\text{C}_{123}\text{H}_{206}\text{N}_{14}\text{O}_{44}\text{Na}$   $[\text{M} + \text{Na}]^+$  2608.05; found 2611.20.

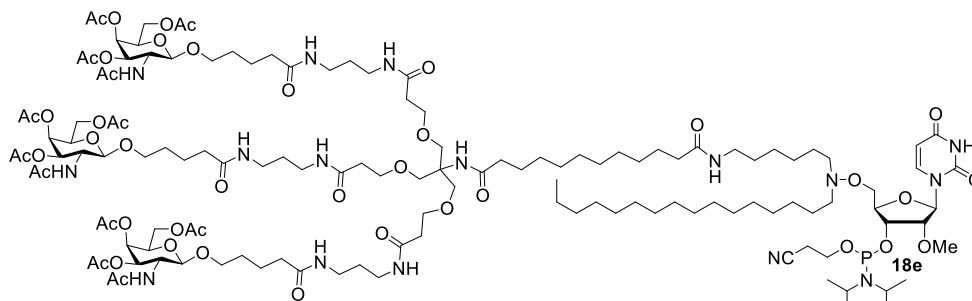

**[(3R,6R)-5-acetamido-6-[5-[3-[3-[3-[3-[5-[(2R,5R)-3-acetamido-4,5-diacetoxy-6-(acetoxymethyl)tetrahydropyran-2-yl]oxypentanoylamino]propylamino]-3-oxo-propoxy]-2-[[3-[3-[5-[(2R,5R)-3-acetamido-4,5-diacetoxy-6-(acetoxymethyl)tetrahydropyran-2-yl]oxypentanoylamino]propylamino]-3-oxo-propoxy]methyl]-2-[[12-[6-[(2R,5R)-3-[2-cyanoethoxy-(diisopropylamino)phosphanyl]oxy-5-(2,4-dioxypyrimidin-1-yl)-4-methoxy-tetrahydrofuran-2-yl]methoxy-hexadecyl-amino]hexylamino]-12-oxo-dodecanoyl]amino]propoxy]propanoyl amino]propylamino]-5-oxo-pentoxy]-3,4-diacetoxy-tetrahydropyran-2-yl]methyl acetate (18e):** To a clear solution of **17e** (1.0 g, 386.85  $\mu\text{mol}$ ) in DCM (20 mL) was added NMI (63.52 mg, 773.69  $\mu\text{mol}$ , 61.67  $\mu\text{L}$ ) and DIPEA (249.98 mg, 1.93 mmol, 336.90  $\mu\text{L}$ ) in single portions. After stirring the reaction mixture for 5 minutes at 22  $^\circ\text{C}$ , 2-cyanoethyl-*N,N*-diisopropylchlorophosphoramidite (183.12 mg, 773.69  $\mu\text{mol}$ , 172.75  $\mu\text{L}$ ) was added and continued stirring for 1 hr and TLC was checked. Starting material was consumed and reaction mixture was diluted with DCM (15 mL). DCM layer was washed with 10%  $\text{NaHCO}_3$  (25 x 2 mL) solution, and brine (30 mL). Organic layer was separated, dried over anhydrous  $\text{Na}_2\text{SO}_4$ , filtered and filtrate was evaporated at 36 $^\circ\text{C}$  to afford crude gummy compound which was triturated with 1:1 hexane and diethylether (20 mL). The solid residue was then dissolved in methyl-*tert*-butylether (30 mL) and the organic layer was washed with 30% DMF in water (20 x 2 mL) followed by brine (30 x 3 mL). Organic layer was separated, dried over anhydrous  $\text{Na}_2\text{SO}_4$ , filtered and the filtrate was evaporated to dryness. Residue was co-evaporated with diethyl ether and dried under high vacuum pump overnight to afford **18e** (0.78 g, 72% yield) as white foam.  $^1\text{H}$  NMR (600 MHz,  $\text{CD}_3\text{CN}$ )  $\delta$  9.40 (s, 1H), 7.88 – 7.76 (m, 1H), 7.19 (q,  $J$  = 7.5 Hz, 3H), 7.05 – 6.88 (m, 7H), 6.61 (d,  $J$  = 17.9 Hz, 1H), 5.88 (dd,  $J$  = 13.4, 4.4 Hz, 1H), 5.61 (d,  $J$  = 8.2 Hz, 1H), 5.28 (dd,  $J$  = 3.4, 1.1 Hz, 4H), 5.03 (dd,  $J$  = 11.2, 3.3 Hz, 4H), 4.55 (d,  $J$  = 8.6 Hz, 4H), 4.41 – 4.23 (m, 1H), 4.14 – 4.02 (m, 8H), 4.02 – 3.93 (m, 8H), 3.90 – 3.77 (m, 4H), 3.70 – 3.60 (m, 16H), 3.52 – 3.44 (m, 5H), 3.18 (dd,  $J$  = 11.7, 6.1 Hz, 12H), 2.72 – 2.63 (m, 8H), 2.37 – 2.32 (m, 7H), 2.18 – 2.05 (m, 19H), 1.98 (s, 11H), 1.91 (s, 10H), 1.85 (s, 9H), 1.64 – 1.50 (m, 21H), 1.36 – 1.17 (m, 79H), 1.13 (s, 19H), 0.88 (t,  $J$  = 6.9 Hz, 3H) ppm.  $^{13}\text{C}$  NMR (151 MHz,  $\text{CD}_3\text{CN}$ )  $\delta$  174.4, 174.4, 174.0, 174.0, 173.8, 172.4, 172.4, 172.4, 171.3, 171.3, 171.3, 171.2, 171.0, 164.0, 163.2, 151.5, 141.1, 141.0, 119.6, 119.5, 102.6, 102.2, 88.3, 87.9, 83.6, 83.6, 83.3, 83.1, 83.0, 83.0, 73.1, 73.0, 72.8, 71.8, 71.7, 71.5, 71.4, 70.1, 69.9, 68.4, 67.9, 62.5, 60.7, 59.8, 59.7, 59.6, 59.3, 59.3, 59.2, 59.0, 59.0, 58.6, 58.6, 51.1, 49.5, 45.9, 45.8, 45.8, 45.7, 44.1, 44.1, 44.0, 44.0, 39.7, 37.5, 37.5, 37.2, 37.1, 36.9, 36.5, 32.6, 30.4, 30.4, 30.4, 30.4, 30.3, 30.3, 30.3, 30.3, 30.2, 30.2, 30.2, 30.1, 30.1, 30.1, 30.0, 30.0, 30.0, 30.0, 29.9, 29.8, 29.5, 28.2, 28.2, 27.9, 27.9, 27.9, 27.8, 27.6, 27.2, 26.7, 26.6, 25.1, 25.0, 25.0, 24.9, 24.9, 24.9, 24.8, 24.3, 23.4, 23.2, 21.0, 21.0, 21.0, 20.9, 20.9, 14.4 ppm.  $^{31}\text{P}$  NMR (243 MHz,  $\text{CD}_3\text{CN}$ )  $\delta$  149.91, 149.87 ppm. MALDI calcd. for  $\text{C}_{132}\text{H}_{223}\text{N}_{16}\text{O}_{45}\text{PNa}$   $[\text{M} + \text{Na}]^+$  2808.26; found 2811.21.

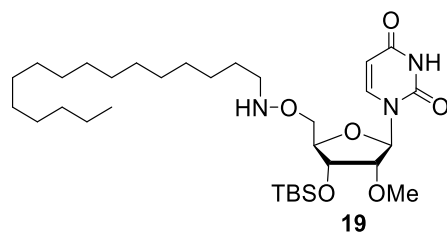

19

**1-[(2R,5R)-4-(tert-butyl(dimethyl)silyloxy)-5-[(hexadecylamino)oxymethyl]-3-methoxy-tetrahydrofuran-2-yl]pyrimidine-2,4-dione (19):** To a solution of **4c** (0.61 g, 1.00 mmol) in glacial acetic acid (10 mL), sodium cyanoborohydride (166.74 mg, 2.60 mmol) was added and stirred for 4 hr at 15 °C. Reaction mixture was diluted with DCM (20 mL) and the organic layer was washed with water (20 mL). Organic layer was dried over anhydrous Na<sub>2</sub>SO<sub>4</sub>, filtered, and the filtrate was evaporated to dryness. The crude compound was purified by flash column chromatography to afford **19** (0.52 g, 85% yield) as transparent gum. <sup>1</sup>H NMR (500 MHz, CDCl<sub>3</sub>) δ 9.50 (s, 1H), 7.88 (d, *J* = 8.1 Hz, 1H), 5.88 (d, *J* = 2.1 Hz, 1H), 5.70 (d, *J* = 8.1 Hz, 1H), 4.17 (dd, *J* = 7.5, 4.8 Hz, 1H), 4.14 – 4.05 (m, 2H), 3.90 – 3.83 (m, 1H), 3.63 (dd, *J* = 4.8, 2.2 Hz, 1H), 3.54 (s, 3H), 2.95 (tt, *J* = 9.4, 4.7 Hz, 2H), 1.53 – 1.46 (m, 2H), 1.26 (s, 26H), 0.91 (s, 10H), 0.88 (t, *J* = 6.8 Hz, 3H), 0.10 (d, *J* = 4.0 Hz, 6H) ppm. <sup>13</sup>C NMR (101 MHz, CDCl<sub>3</sub>) δ 163.7, 163.7, 150.3, 140.2, 102.0, 88.4, 84.0, 82.5, 77.5, 77.2, 76.8, 71.7, 69.6, 69.5, 58.6, 52.4, 32.0, 29.8, 29.8, 29.7, 29.7, 29.6, 29.5, 27.4, 27.3, 25.8, 22.8, 18.3, 14.2, -4.5, -4.8 ppm. HRMS calcd. for C<sub>32</sub>H<sub>62</sub>N<sub>3</sub>O<sub>6</sub>Si [M + H]<sup>+</sup> 612.4408, found 612.4423.

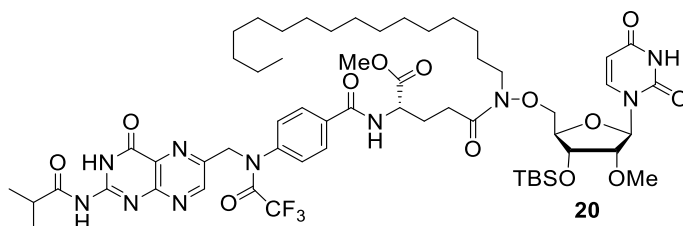

20

**Methyl-(2S)-5-[[3-[(tert-butyl(dimethyl)silyloxy)-5-(2,4-dioxypyrimidin-1-yl)-4-methoxy-tetrahydrofuran-2-yl]methoxy-hexadecyl-amino]-2-[[4-[[2-(2-methylpropanoylamino)-4-oxo-3H-pteridin-6-yl]methyl-(2,2,2-trifluoroacetyl)amino]benzoyl]amino]-5-oxo-pentanoate (20):** To a clear solution of (4S)-5-methoxy-4-[[4-[[2-(2-methylpropanoylamino)-4-oxo-3H-pteridin-6-yl]methyl-(2,2,2-trifluoroacetyl)amino]benzoyl]amino]-5-oxo-pentanoic acid (0.56 g, 901.02 μmol) in dimethylformamide (4 mL), were added N-(3-dimethylaminopropyl)-N'-ethylcarbodiimide hydrochloride (172.72 mg, 901.02 μmol) 1-hydroxy-7-azabenzotriazole tetrahydrate (187.56 mg, 901.02 μmol) and DIPEA (349.34 mg, 2.70 mmol, 470.81 μL) in single portions. After 5 minutes, **19** (551.36 mg, 901.02 μmol) was added and the resulting mixture was stirred for 10 hr at 25 °C. All the volatile matters were removed under high vacuum pump and the residue was diluted with DCM (30 mL), and water (20 mL). Organic layer was separated, washed with NaHCO<sub>3</sub> solution (20 mL), water (20 mL) and brine (30 x 3 mL). DCM layer was separated, dried on anhydrous Na<sub>2</sub>SO<sub>4</sub>, filtered and the filtrate was evaporated to dryness. The crude mass obtained, was purified by flash column chromatography (gradient: 0-5% MeOH in DCM) to afford **20** (0.81 g, 666.43 μmol, 74% yield) as white solid. <sup>1</sup>H NMR (600 MHz, CDCl<sub>3</sub>) δ 12.54 (s, 1H), 10.14 (s, 1H), 9.99 (s, 1H), 8.96 (s, 1H), 7.85 – 7.80 (m, 2H), 7.63 – 7.47 (m, 2H), 7.42 (d, *J* = 8.2 Hz, 2H), 5.76 (s, 1H), 5.64 (dd, *J* = 8.3, 2.1 Hz, 1H), 5.29 (d, *J* = 11.8 Hz, 1H), 5.21 (d, *J* = 15.4 Hz, 1H), 4.74 – 4.67 (m, 1H), 4.20 – 4.13 (m, 2H), 4.08 (d, *J* = 11.5 Hz, 2H), 3.75 (s, 3H), 3.69 (s, 2H), 3.52 (s, 3H), 2.82 (s, 1H), 2.68 (s, 2H), 2.34 (d, *J* = 14.6 Hz, 1H), 2.21 – 2.12 (m, 1H), 1.59 (s, 2H), 1.30 – 1.22 (m, 35H), 0.90 (s, 10H), 0.87 (t, *J* = 7.0 Hz, 3H), 0.09 (d, *J* = 11.2 Hz, 6H) ppm. <sup>13</sup>C NMR (151 MHz, CDCl<sub>3</sub>) δ 180.5, 173.7, 173.5, 172.7, 171.4, 169.2, 165.9, 163.4, 159.6, 157.8, 157.5, 157.3, 157.0, 154.8, 151.3, 150.0, 149.9, 149.0, 148.8, 142.3, 141.9, 139.8, 134.5, 131.1, 130.7, 130.6, 129.0, 128.6, 128.2, 119.1, 117.1, 115.2, 113.3, 102.5, 89.4, 83.0, 81.0, 72.4, 69.7, 58.6, 58.4, 54.6, 53.6, 53.0, 53.0, 52.8, 46.1, 36.5, 32.0, 29.8, 29.8, 29.8,

29.8, 29.7, 29.7, 29.5, 29.5, 27.3, 26.9, 25.6, 22.8, 19.0, 19.0, 19.0, 19.0, 18.2, 14.3, 0.1, -4.4, -4.9 ppm.  $^{19}\text{F}$  NMR (565 MHz,  $\text{CDCl}_3$ )  $\delta$  -67.0 ppm. HRMS calcd. for  $\text{C}_{58}\text{H}_{86}\text{F}_3\text{N}_{10}\text{O}_{13}\text{Si}$   $[\text{M} + \text{H}]^+$  1215.6097, found 1215.6097.

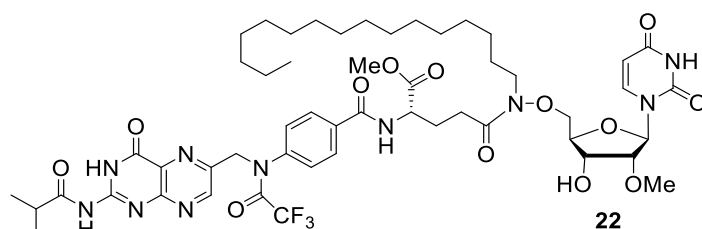

**Methyl(2S)-5-[[5-(2,4-dioxypyrimidin-1-yl)-3-hydroxy-4-methoxy-tetrahydrofuran-2-yl]methoxy-hexadecyl-amino]-2-[[4-[[2-(2-methylpropanoylamino)-4-oxo-3H-pteridin-6-yl]methyl-(2,2,2-trifluoroacetyl)amino]benzoyl]amino]-5-oxo-pentanoate (22):** To a clear solution of **20** (0.9 g, 740.48  $\mu\text{mol}$ ) in THF (20 mL) was added TBAF (251.69 mg, 962.62  $\mu\text{mol}$ , 278.72  $\mu\text{L}$ ) in single portion and stirred for 12 hr at 22 °C. All the volatile matters were evaporated under high vacuum pump and the crude residue thus obtained, was purified by flash column chromatography (gradient: 5% MeOH in DCM) to afford **22** (0.55 g, 67% yield) as yellow solid.  $^1\text{H}$  NMR (600 MHz,  $\text{DMSO}-d_6$ )  $\delta$  12.35 (s, 1H), 11.97 (s, 1H), 11.38 (s, 1H), 8.90 (s, 1H), 8.87 (d,  $J = 7.3$  Hz, 1H), 7.90 (d,  $J = 8.1$  Hz, 2H), 7.69 (d,  $J = 8.1$  Hz, 2H), 7.63 (s, 2H), 5.83 (d,  $J = 4.8$  Hz, 1H), 5.61 (dt,  $J = 7.9$ , 1.6 Hz, 1H), 5.37 (d,  $J = 6.1$  Hz, 1H), 5.27 – 5.18 (m, 2H), 4.44 (q,  $J = 7.2$  Hz, 1H), 4.09 (t,  $J = 11.1$  Hz, 3H), 4.04 – 3.95 (m, 2H), 3.81 (t,  $J = 5.0$  Hz, 1H), 3.62 (s, 3H), 3.54 (qt,  $J = 13.9$ , 7.2 Hz, 2H), 3.34 (dd,  $J = 2.7$ , 1.3 Hz, 7H), 3.05 – 2.99 (m, 1H), 2.78 (hept,  $J = 6.9$  Hz, 1H), 2.59 – 2.51 (m, 3H), 2.10 (dt,  $J = 14.2$ , 6.8 Hz, 1H), 1.96 (h,  $J = 7.3$  Hz, 1H), 1.57 (td,  $J = 10.1$ , 6.1 Hz, 1H), 1.48 (hept,  $J = 6.9$  Hz, 2H), 1.31 (h,  $J = 7.6$  Hz, 1H), 1.24 – 1.11 (m, 42H), 0.91 (td,  $J = 7.3$ , 1.3 Hz, 1H), 0.86 – 0.81 (m, 3H) ppm.  $^{13}\text{C}$  NMR (151 MHz,  $\text{DMSO}-d_6$ )  $\delta$  180.8, 172.8, 172.4, 165.7, 162.9, 159.1, 156.1, 155.9, 155.6, 155.4, 154.8, 150.4, 150.0, 149.8, 147.8, 141.8, 140.2, 134.2, 130.6, 129.1, 128.7, 128.5, 119.0, 117.0, 115.1, 113.2, 102.1, 86.6, 81.7, 81.1, 79.2, 73.1, 68.6, 57.6, 54.0, 52.3, 51.9, 51.8, 44.3, 35.0, 31.3, 29.1, 29.0, 29.0, 28.9, 28.8, 28.7, 28.7, 28.1, 26.3, 26.1, 25.4, 25.1, 22.1, 19.4, 18.8, 13.9, 13.5 ppm.  $^{19}\text{F}$  NMR (565 MHz,  $\text{DMSO}-d_6$ )  $\delta$  -66.1 ppm. HRMS calcd. for  $\text{C}_{52}\text{H}_{72}\text{F}_3\text{N}_{10}\text{O}_{13}$   $[\text{M} + \text{H}]^+$  1101.5232, found 1101.5220.

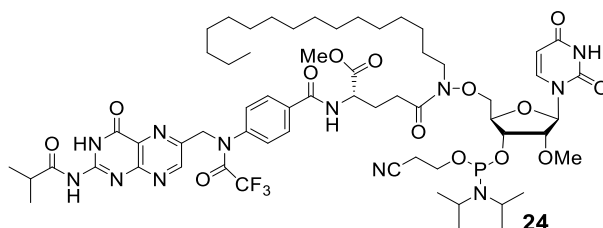

**Methyl(2S)-5-[[3-[2-cyanoethoxy-(diisopropylamino)phosphanyl]oxy-5-(2,4-dioxypyrimidin-1-yl)-4-methoxy-tetrahydrofuran-2-yl]methoxy-hexadecyl-amino]-2-[[4-[[2-(2-methylpropanoylamino)-4-oxo-3H-pteridin-6-yl]methyl-(2,2,2-trifluoroacetyl)amino]benzoyl]amino]-5-oxo-pentanoate (24):** To a clear solution of **22** (0.31 g, 281.52  $\mu\text{mol}$ ) in DCM (20 mL) was added NMI (46.23 mg, 563.04  $\mu\text{mol}$ , 44.88  $\mu\text{L}$ ) and DIPEA (181.92 mg, 1.41 mmol, 245.17  $\mu\text{L}$ ) in single portions. After stirring the reaction mixture for 5 minutes at 22 °C, 2-cyanoethyl-*N,N*-diisopropylchlorophosphoramidite (133.26 mg, 563.04  $\mu\text{mol}$ , 125.72  $\mu\text{L}$ ) was added and continued stirring for 1 hr and TLC was checked. Starting material was consumed and reaction mixture was diluted with DCM (15 mL). DCM layer was washed with 10%  $\text{NaHCO}_3$  (2 x 25 mL) solution, and brine (30 mL). Organic layer was separated, dried over anhydrous  $\text{Na}_2\text{SO}_4$ , filtered and filtrate was evaporated at 36 °C to afford crude compound which was triturated with 1:1 diethylether-hexane mixture (30 mL) to afford off-white precipitate. This residue was dissolved in DCM (20 mL),

evaporated and co-evaporated with MTBE (20 mL) to afford **24** (0.33 g, 90% yield) as off-white foam. <sup>1</sup>H NMR (600 MHz, CD<sub>3</sub>CN) δ 8.79 (d, *J* = 1.6 Hz, 1H), 7.87 – 7.75 (m, 3H), 7.60 – 7.32 (m, 3H), 5.89 – 5.74 (m, 1H), 5.62 – 5.56 (m, 1H), 5.17 (s, 2H), 4.57 – 4.20 (m, 2H), 4.18 – 3.96 (m, 4H), 3.91 – 3.60 (m, 9H), 3.55 – 3.38 (m, 5H), 2.76 – 2.62 (m, 4H), 2.25 – 2.01 (m, 10H), 1.55 (s, 2H), 1.28 – 1.15 (m, 56H), 0.87 (t, *J* = 7.0 Hz, 3H) ppm. <sup>13</sup>C NMR (151 MHz, CD<sub>3</sub>CN) δ 181.8, 173.3, 173.3, 173.2, 166.8, 166.7, 163.8, 163.7, 163.2, 160.7, 157.5, 157.3, 156.1, 151.2, 151.2, 151.0, 149.2, 143.2, 140.8, 138.9, 135.5, 132.1, 132.1, 130.0, 129.6, 129.3, 129.3, 119.7, 119.6, 116.4, 103.1, 73.4, 73.2, 73.1, 71.2, 71.1, 69.7, 59.7, 59.5, 59.2, 59.1, 59.1, 59.0, 59.0, 58.9, 58.6, 55.2, 54.0, 53.9, 52.8, 49.5, 46.0, 45.9, 44.1, 44.1, 44.0, 36.8, 36.5, 33.6, 32.6, 31.3, 30.4, 30.4, 30.3, 30.3, 30.3, 30.2, 30.2, 30.1, 30.0, 30.0, 29.9, 29.6, 27.7, 27.4, 27.3, 27.2, 26.2, 25.0, 25.0, 25.0, 24.9, 24.9, 24.9, 24.8, 23.4, 23.2, 23.1, 23.1, 23.1, 21.0, 21.0, 21.0, 20.6, 20.6, 19.8, 19.2, 19.1, 14.4 ppm. <sup>19</sup>F NMR (565 MHz, CD<sub>3</sub>CN) δ -67.69, -67.70 ppm. <sup>31</sup>P NMR (243 MHz, CD<sub>3</sub>CN) δ 150.2, 149.9 ppm. HRMS calcd. for C<sub>61</sub>H<sub>89</sub>F<sub>3</sub>N<sub>12</sub>O<sub>14</sub>P [M + H]<sup>+</sup> 1301.6311, found 1301.6333.

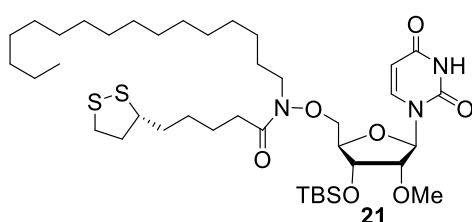

***N*-[[*(2R,5R)*-3-[*tert*-butyl(dimethyl)silyl]oxy-5-(2,4-dioxypyrimidin-1-yl)-4-methoxy-tetrahydrofuran-2-yl]methoxy]-5-(dithiolan-3-yl)-*N*-hexadecyl-pentanamide (**21**):** To a clear solution of (±)-1,2-dithiolane-3-pentanoic acid (454.16 mg, 2.16 mmol) in DMF (10 mL), were added 1-hydroxy-7-azabenzotriazole tetrahydrate (458.21 mg, 2.16 mmol), *N*-(3-dimethylaminopropyl)-*N*'-ethylcarbodiimide hydrochloride (435.28 mg, 2.16 mmol) and DIPEA (469.34 mg, 3.60 mmol, 632.53 μL) in single portions. After 5 minutes, **19** (1.1 g, 1.80 mmol) was added and the resulting mixture was stirred for 8 hr at 25 °C. Reaction mixture was diluted with EtOAc (30 mL), and cold water (20 mL). Organic layer was separated, washed with NaHCO<sub>3</sub> solution (20 mL), water (20 mL) and brine (30 x 3 mL). EtOAc layer was separated, dried on anhydrous Na<sub>2</sub>SO<sub>4</sub>, filtered and the filtrate was evaporated to dryness. The crude mass obtained, was purified by flash column chromatography to afford **21** (0.95 g, 66% yield). <sup>1</sup>H NMR (400 MHz, CDCl<sub>3</sub>) δ 9.30 (s, 1H), 7.59 (s, 1H), 5.86 (t, *J* = 1.8 Hz, 1H), 5.72 (d, *J* = 8.1 Hz, 1H), 4.23 – 4.12 (m, 2H), 4.10 – 4.00 (m, 1H), 3.73 – 3.67 (m, 1H), 3.67 – 3.49 (m, 5H), 3.22 – 3.04 (m, 2H), 2.49 – 2.30 (m, 3H), 1.96 – 1.82 (m, 1H), 1.75 – 1.55 (m, 4H), 1.51 – 1.37 (m, 2H), 1.33 – 1.21 (m, 28H), 0.91 (s, 9H), 0.89 – 0.84 (m, 3H), 0.11 (d, *J* = 6.1 Hz, 6H) ppm. <sup>13</sup>C NMR (101 MHz, CDCl<sub>3</sub>) δ 163.17, 150.04, 140.05, 102.51, 89.19, 83.27, 81.34, 72.22, 69.80, 58.37, 56.52, 56.50, 40.37, 38.63, 34.90, 34.87, 32.06, 29.83, 29.82, 29.79, 29.71, 29.49, 29.46, 29.17, 29.15, 26.91, 25.80, 24.48, 22.82, 18.24, 14.25, -4.27, -4.73 ppm. HRMS calcd. for C<sub>40</sub>H<sub>74</sub>N<sub>3</sub>O<sub>7</sub>S<sub>2</sub>Si [M + H]<sup>+</sup> 800.4737, found 800.4751.

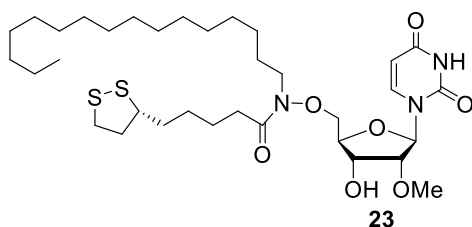

***N*-[[*(2R,5R)*-5-(2,4-dioxypyrimidin-1-yl)-3-hydroxy-4-methoxy-tetrahydrofuran-2-yl]methoxy]-5-(dithiolan-3-yl)-*N*-hexadecyl-pentanamide (**23**):** To a solution of **21** (0.85 g, 1.06 mmol) in THF (10 mL) at 25 °C, tetrabutylammonium fluoride, 1M in THF (280.52 mg, 1.06 mmol, 1.06 mL) was added slowly in single portion and then stirred for 4 hr. Volatile matters were removed in high vacuum pump and crude residue thus obtained was purified by flash column chromatography (gradient: 10-60% EtOAc in hexane) to afford **23** (0.52 g, 71% yield). <sup>1</sup>H NMR (400 MHz, CDCl<sub>3</sub>) δ 8.98 (s, 1H), 7.61

(s, 1H), 5.92 (s, 1H), 5.72 (dd,  $J = 8.2, 1.8$  Hz, 1H), 4.31 (dt,  $J = 10.4, 2.0$  Hz, 1H), 4.24 (s, 1H), 4.14 – 4.01 (m, 2H), 3.81 (dd,  $J = 5.4, 1.7$  Hz, 1H), 3.65 (s, 3H), 3.61 – 3.51 (m, 2H), 3.23 – 3.06 (m, 2H), 2.78 (s, 1H), 2.45 (tt,  $J = 15.3, 7.7$  Hz, 3H), 1.97 – 1.84 (m, 1H), 1.82 – 1.46 (m, 7H), 1.56 – 1.40 (m, 2H), 1.25 (s, 26H), 0.88 (t,  $J = 6.8$  Hz, 3H) ppm.  $^{13}\text{C}$  NMR (101 MHz,  $\text{CDCl}_3$ )  $\delta$  162.9, 150.0, 139.4, 102.5, 88.2, 83.3, 81.5, 71.9, 68.5, 59.0, 56.6, 56.5, 40.4, 38.6, 34.8, 34.8, 32.4, 32.1, 29.8, 29.8, 29.7, 29.5, 29.4, 29.2, 29.1, 26.9, 24.5, 22.8, 14.3 ppm. HRMS calcd. for  $\text{C}_{34}\text{H}_{60}\text{N}_3\text{O}_7\text{S}_2$   $[\text{M} + \text{H}]^+$  686.3873, found 686.3855.

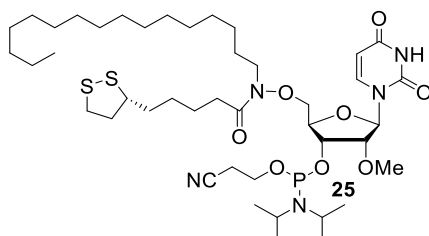

***N*-[[*(2R,5R)*-3-[2-cyanoethoxy-(*diisopropylamino*)phosphanyl]oxy-5-(2,4-dioxopyrimidin-1-yl)-4-methoxy-tetrahydrofuran-2-yl]methoxy]-5-(dithiolan-3-yl)-*N*-hexadecyl-pentanamide (**25**):** To a clear solution of **23** (0.35 g, 510.22  $\mu\text{mol}$ ) in DCM (15 mL), DIPEA (333.04 mg, 2.55 mmol, 448.84  $\mu\text{L}$ ) and NMI (148.09 mg, 1.79 mmol, 143.78  $\mu\text{L}$ ) were added at 22 °C. To this reaction mixture, 2-cyanoethyl-*N,N*-diisopropylchlorophosphoramidite (254.23 mg, 1.02 mmol, 239.84  $\mu\text{L}$ ) was added slowly after 5 minutes and stirred for 1 hr. Reaction mixture was diluted with DCM (10 mL) and quenched with 10%  $\text{NaHCO}_3$  solution (20 mL). Organic layer was separated, dried on anhydrous  $\text{Na}_2\text{SO}_4$ , filtered and filtrate was evaporated to dryness. The crude compound was thus obtained was purified by flash column chromatography (gradient: 10-50% EtOAc in hexane) to afford **25** (0.205 g, 45% yield) as transparent yellow gum.  $^1\text{H}$  NMR (400 MHz,  $\text{CDCl}_3$ )  $\delta$  8.65 (s, 1H), 7.58 (s, 1H), 5.99 – 5.86 (m, 1H), 5.78 – 5.65 (m, 1H), 4.44 – 4.31 (m, 2H), 4.27 – 4.18 (m, 2H), 4.13 – 3.98 (m, 1H), 3.96 – 3.85 (m, 2H), 3.83 – 3.50 (m, 10H), 3.23 – 3.06 (m, 2H), 2.65 (dt,  $J = 12.5, 6.2$  Hz, 2H), 2.52 – 2.34 (m, 3H), 1.97 – 1.84 (m, 1H), 1.78 – 1.56 (m, 2H), 1.53 – 1.39 (m, 2H), 1.36 – 1.16 (m, 43H), 0.92 – 0.83 (m, 3H) ppm.  $^{13}\text{C}$  NMR (101 MHz,  $\text{CDCl}_3$ )  $\delta$  163.0, 162.9, 150.1, 140.0, 117.8, 117.0, 102.7, 102.6, 82.9, 72.5, 70.3, 70.2, 60.5, 59.0, 58.5, 58.3, 58.3, 58.1, 57.9, 57.7, 56.6, 56.5, 45.5, 45.4, 43.6, 43.6, 43.5, 43.4, 40.4, 38.6, 34.9, 34.9, 32.0, 29.8, 29.8, 29.7, 29.5, 29.5, 29.2, 29.1, 26.9, 26.9, 24.9, 24.8, 24.7, 24.7, 24.7, 24.5, 23.1, 23.1, 23.0, 23.0, 22.8, 20.7, 20.6, 20.6, 20.3, 20.2, 14.3, 14.2 ppm.  $^{31}\text{P}$  NMR (162 MHz,  $\text{CDCl}_3$ )  $\delta$  150.8 ppm. HRMS calcd. for  $\text{C}_{43}\text{H}_{77}\text{N}_5\text{O}_8\text{PS}_2$   $[\text{M} + \text{H}]^+$  886.4951, found 886.4966.

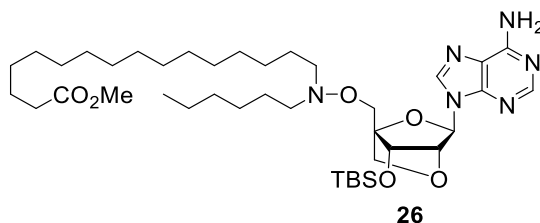

***Methyl-16*-[[*(4R,6R)*-6-(6-aminopurin-9-yl)-7-[*tert*-butyl(*dimethyl*)silyl]oxy-2,5-dioxabicyclo[2.2.1]heptan-4-yl]methoxy-hexyl-amino]hexadecanoate (**26**):** To a solution of **10** (0.7 g, 1.71 mmol) in DCM (13.87 mL) was added Hexanal (171.62 mg, 1.71 mmol, 205.78  $\mu\text{L}$ ) at 22 °C. The resulting clear solution was stirred for 3 hr. To this reaction mixture was added sodium cyanoborohydride (279.95 mg, 4.46 mmol) in portions. Reaction mixture was stirred for 1 hr and methyl-16-oxohexadecanoate<sup>6, 7</sup> (487.37 mg, 1.71 mmol, 501.94  $\mu\text{L}$ ) was added into it. Stirring continue for 1 hr and then second batch of sodium cyanoborohydride (279.95 mg, 4.46 mmol) was added. Reaction mixture was diluted with DCM (20 mL) after 3 hr. Organic layer was washed with water (10 mL), brine (2 x 20 mL) and organic layer was separated. DCM layer was dried over anhydrous  $\text{Na}_2\text{SO}_4$ , filtered and the filtrate was evaporated to dryness. The crude compound was

purified by column chromatography (gradient: 10-50 % EtOAc in hexane) to afford **26** (0.6 g, 46% yield) as white solid.  $^1\text{H}$  NMR (500 MHz,  $\text{CDCl}_3$ )  $\delta$  8.33 (s, 1H), 8.03 (s, 1H), 5.96 (s, 1H), 5.71 (s, 2H), 4.70 (s, 1H), 4.35 (s, 1H), 4.10 – 4.07 (m, 2H), 4.02 (d,  $J = 10.8$  Hz, 1H), 3.96 (d,  $J = 7.7$  Hz, 1H), 3.66 (s, 3H), 2.67 (hept,  $J = 6.3$  Hz, 4H), 2.30 (t,  $J = 7.6$  Hz, 2H), 1.66 – 1.51 (m, 6H), 1.35 – 1.22 (m, 30H), 0.88 (s, 12H), 0.07 (s, 3H), 0.04 (s, 3H) ppm.  $^{13}\text{C}$  NMR (101 MHz,  $\text{CDCl}_3$ )  $\delta$  174.5, 155.5, 153.2, 149.0, 138.9, 120.2, 87.0, 86.8, 79.3, 72.7, 69.4, 59.5, 51.6, 34.3, 31.9, 29.8, 29.8, 29.8, 29.7, 29.7, 29.6, 29.4, 29.3, 27.6, 27.3, 27.3, 25.7, 25.1, 22.7, 18.0, 14.2, -4.5, -5.0 ppm. HRMS calcd. for  $\text{C}_{40}\text{H}_{73}\text{N}_6\text{O}_6\text{Si}$   $[\text{M} + \text{H}]^+$  761.5361, found 761.5358.

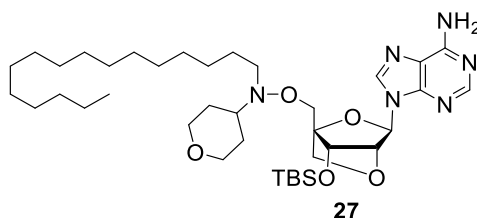

**9-[(4R,6R)-7-[tert-butyl(dimethyl)silyloxy]-4-[[hexadecyl(tetrahydropyran-4-yl)amino]oxy methyl]-2,5-dioxabicyclo[2.2.1]heptan-6-yl]purin-6-amine (27):** To a clear solution of **10** (0.8 g, 1.96 mmol) in a mixture of acetic acid (10 mL) and DCM (5 mL) was added tetrahydro-4H-pyran-4-one (196.06 mg, 1.96 mmol, 181.54  $\mu\text{L}$ ) and stirred for 3 hr at 22 °C. To this reaction mixture was added sodium cyanoborohydride (319.95 mg, 5.09 mmol). Reaction mixture was stirred for 2 hr and then hexadecanal (706.21 mg, 2.94 mmol) was added in single portion at 15 °C. After stirring the mixture for 1 hr, a second batch of sodium cyanoborohydride (319.95 mg, 5.09 mmol) was added and kept stirring for 9 hr. Reaction mixture was diluted with DCM (20 mL), organic layer was washed with water (20 mL) and brine (2 x 30 mL). Organic layer was separated, dried over anhydrous  $\text{Na}_2\text{SO}_4$ , filtered and the filtrate was evaporated to dryness. The crude thus obtained was purified by flash column chromatography (gradient: 20-70% EtOAc in hexane) to afford **27** (0.7 g, 50% yield) as white solid.  $^1\text{H}$  NMR (400 MHz,  $\text{CDCl}_3$ )  $\delta$  8.36 (s, 1H), 8.05 (s, 1H), 6.03 (s, 2H), 5.97 (d,  $J = 0.7$  Hz, 1H), 4.72 (s, 1H), 4.36 (s, 1H), 4.11 – 3.98 (m, 5H), 3.95 (d,  $J = 7.7$  Hz, 1H), 3.72 (s, 2H), 3.37 (td,  $J = 11.9, 2.1$  Hz, 2H), 2.87 – 2.68 (m, 3H), 1.81 (s, 3H), 1.73 – 1.55 (m, 4H), 1.25 (d,  $J = 3.6$  Hz, 24H), 0.88 (s, 12H), 0.06 (d,  $J = 13.8$  Hz, 6H) ppm.  $^{13}\text{C}$  NMR (101 MHz,  $\text{CDCl}_3$ )  $\delta$  158.55, 155.59, 153.07, 152.07, 148.89, 138.88, 132.82, 132.59, 129.70, 127.24, 125.24, 124.77, 120.08, 87.09, 86.85, 79.07, 72.67, 72.19, 70.23, 67.14, 67.10, 62.82, 55.11, 37.70, 32.07, 29.85, 29.82, 29.81, 29.77, 29.72, 29.51, 27.65, 27.05, 25.70, 22.84, 17.99, 14.28, 0.15, -4.45, -4.95 ppm. HRMS calcd. for  $\text{C}_{38}\text{H}_{69}\text{N}_6\text{O}_5\text{Si}$   $[\text{M} + \text{H}]^+$  717.5099, found 717.5095.

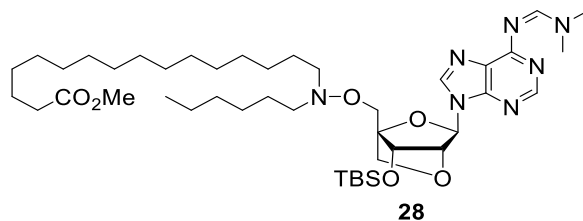

**Methyl-16-[[[(4R,6R)-7-[tert-butyl(dimethyl)silyloxy]-6-[6-[(Z)-dimethylaminomethylene]amino]purin-9-yl]-2,5-dioxabicyclo[2.2.1]heptan-4-yl]methoxy-hexyl-amino]hexadecanoate (28):** To a clear solution of **26** (0.4 g, 525.54  $\mu\text{mol}$ ) in dimethylformamide was added *N,N*-dimethylformamide dimethyl acetal (93.94 mg, 788.31  $\mu\text{mol}$ , 105.55  $\mu\text{L}$ ) in single portion and the reaction mixture was stirred at 65 °C for 4 hr. TLC was checked, and volatile matters was removed under high vacuum pump. Residue was dissolved in DCM (100 mL) and the organic layer was washed with brine (3 x 50 mL). DCM layer was then dried over anhydrous  $\text{Na}_2\text{SO}_4$ , filtered and the filtrate was evaporated to dryness. Crude mass thus obtained, was purified by flash column chromatography (gradient: 30-80% EtOAc in hexane) to afford **28** (0.38 g, 89% yield) as transparent gum.  $^1\text{H}$  NMR (600 MHz,  $\text{CDCl}_3$ )  $\delta$  8.95 (d,  $J = 2.1$  Hz, 1H), 8.52 (d,  $J = 2.0$  Hz, 1H), 8.13 (d,  $J = 2.0$  Hz, 1H), 6.00



(d,  $J = 2.0$  Hz, 1H), 4.66 (d,  $J = 2.1$  Hz, 1H), 4.31 (d,  $J = 2.0$  Hz, 1H), 4.10 – 4.05 (m, 2H), 4.02 (dd,  $J = 10.9, 2.0$  Hz, 1H), 3.95 (dd,  $J = 7.7, 2.1$  Hz, 1H), 3.66 (d,  $J = 2.0$  Hz, 3H), 3.27 (d,  $J = 2.0$  Hz, 3H), 3.21 (d,  $J = 2.1$  Hz, 3H), 2.67 (q,  $J = 6.5$  Hz, 4H), 2.29 (td,  $J = 7.6, 2.1$  Hz, 2H), 1.61 (t,  $J = 7.1$  Hz, 2H), 1.54 (q,  $J = 7.5$  Hz, 4H), 1.34 – 1.22 (m, 29H), 0.90 – 0.84 (m, 12H), 0.05 – -0.08 (m, 6H) ppm.  $^{13}\text{C}$  NMR (151 MHz,  $\text{CDCl}_3$ )  $\delta$  174.5, 159.7, 158.1, 152.8, 150.5, 139.8, 126.6, 86.9, 86.8, 79.2, 72.7, 72.1, 69.2, 59.5, 51.6, 41.4, 35.3, 34.3, 31.9, 29.8, 29.8, 29.8, 29.7, 29.7, 29.6, 29.4, 29.3, 27.6, 27.3, 27.3, 25.7, 25.1, 22.8, 18.0, 14.2, -4.6, -5.0 ppm. HRMS calcd. for  $\text{C}_{43}\text{H}_{78}\text{N}_7\text{O}_6\text{Si}$   $[\text{M} + \text{H}]^+$  816.5783, found 816.5756.

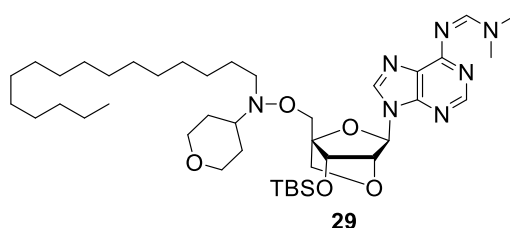

***N'*-[9-[(4*R*,6*R*)-7-[tert-butyl(dimethyl)silyl]oxy-4-[[hexadecyl(tetrahydropyran-4-yl)amino]oxymethyl]-2,5-dioxabicyclo[2.2.1]heptan-6-yl]purin-6-yl]-*N,N*-dimethyl-formamide (29):** To a clear solution of **27** (0.7 g, 976.20  $\mu\text{mol}$ ) in DMF (5 mL) was added dimethylformamide dimethyl acetal (116.32 mg, 976.20  $\mu\text{mol}$ , 130.70  $\mu\text{L}$ ) in single portion and the reaction mixture was stirred at 65 °C for 10 hr. TLC was checked, and volatile matters was removed under high vacuum pump. Residue was dissolved in DCM (50 mL) and the organic layer was washed with brine (3 x 30 mL). DCM layer was then dried over anhydrous  $\text{Na}_2\text{SO}_4$ , filtered and the filtrate was evaporated to dryness. Crude mass thus obtained, was purified by flash column chromatography (gradient: 0-5% MeOH in DCM) to afford **29** (0.64 g, 85% yield) as transparent gum.  $^1\text{H}$  NMR (600 MHz,  $\text{DMSO}-d_6$ )  $\delta$  8.91 (s, 1H), 8.40 (s, 1H), 8.26 (s, 1H), 5.98 (s, 1H), 4.63 (s, 1H), 4.59 (s, 1H), 4.10 (d,  $J = 11.0$  Hz, 1H), 3.97 – 3.91 (m, 2H), 3.83 (dd,  $J = 9.6, 5.9$  Hz, 3H), 3.27 – 3.19 (m, 5H), 3.13 (s, 3H), 2.79 – 2.60 (m, 3H), 1.70 (d,  $J = 15.3$  Hz, 2H), 1.54 – 1.41 (m, 5H), 1.30 – 1.18 (m, 27H), 0.85 (d,  $J = 6.1$  Hz, 12H), 0.07 (s, 6H) ppm.  $^{13}\text{C}$  NMR (151 MHz,  $\text{DMSO}-d_6$ )  $\delta$  159.3, 158.0, 151.9, 150.4, 140.4, 125.6, 86.1, 85.5, 78.7, 72.2, 71.7, 70.5, 66.0, 62.0, 54.2, 40.7, 34.6, 31.3, 29.0, 29.0, 28.9, 28.9, 28.7, 26.9, 26.3, 25.4, 22.1, 17.5, 14.0, -4.8, -5.3 ppm. HRMS calcd. for  $\text{C}_{41}\text{H}_{74}\text{N}_7\text{O}_5\text{Si}$   $[\text{M} + \text{H}]^+$  772.5521, found 772.5514.

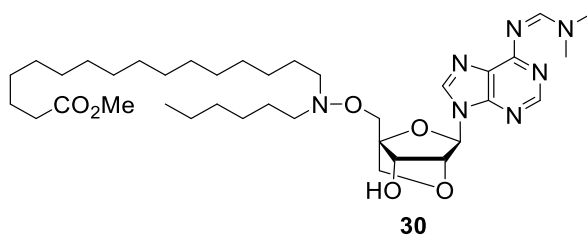

***Methy*-16-[[4*R*,6*R*)-6-[6-[(*Z*)-dimethylaminomethyleneamino]purin-9-yl]-7-hydroxy-2,5-dioxabicyclo[2.2.1]heptan-4-yl]methoxy-hexyl-amino]hexadecanoate (30):** To a clear solution of **28** (0.37 g, 453.32  $\mu\text{mol}$ ) in THF (25 mL) was added TBAF (154.08 mg, 589.32  $\mu\text{mol}$ , 170.63  $\mu\text{L}$ ) in single portion and stirred for 4 hr at 22 °C. All the volatile matters were evaporated under high vacuum pump and the crude residue thus obtained, was purified by flash column chromatography (gradient: 0-5% MeOH in DCM) to afford **30** (0.28 g, 88% yield) as transparent gum.  $^1\text{H}$  NMR (600 MHz,  $\text{DMSO}-d_6$ )  $\delta$  8.91 (s, 1H), 8.42 (s, 1H), 8.25 (s, 1H), 5.94 (s, 1H), 5.78 (d,  $J = 4.4$  Hz, 1H), 4.42 (s, 1H), 4.29 (d,  $J = 4.4$  Hz, 1H), 4.15 (d,  $J = 11.2$  Hz, 1H), 3.99 (d,  $J = 11.1$  Hz, 1H), 3.95 (d,  $J = 7.8$  Hz, 1H), 3.82 (d,  $J = 7.8$  Hz, 1H), 3.57 (s, 3H), 3.20 (s, 3H), 3.13 (s, 3H), 2.67 – 2.55 (m, 5H), 2.27 (t,  $J = 7.4$  Hz, 2H), 1.49 (pd,  $J = 7.5, 2.8$  Hz, 7H), 1.31 – 1.17 (m, 35H), 0.83 (t,  $J = 6.8$  Hz, 3H) ppm.  $^{13}\text{C}$  NMR (151 MHz,  $\text{DMSO}-d_6$ )  $\delta$  173.4, 159.2, 158.0, 152.1, 150.5, 139.5, 125.6, 86.2, 85.2, 79.2, 79.0, 71.4, 70.7,

69.7, 58.5, 58.4, 51.1, 40.7, 34.5, 33.3, 31.2, 29.0, 29.0, 28.9, 28.9, 28.9, 28.7, 28.4, 26.8, 26.6, 26.5, 26.4, 24.4, 22.1, 13.9 ppm. HRMS calcd. for C<sub>37</sub>H<sub>64</sub>N<sub>7</sub>O<sub>6</sub> [M + H]<sup>+</sup> 702.4918, found 702.4937.

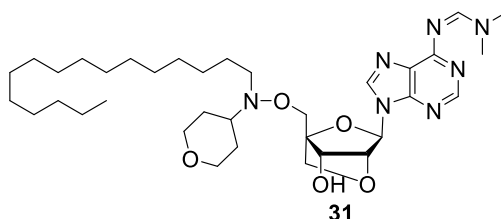

***N'*-[9-[(4*R*,6*R*)-4-[[hexadecyl(tetrahydropyran-4-yl)amino]oxymethyl]-7-hydroxy-2,5-dioxabicyclo[2.2.1]heptan-6-yl]purin-6-yl]-*N,N*-dimethyl-formamidine (**31**):** To a clear solution of **29** (0.19 g, 246.07 μmol) in THF (5 mL) was added TBAF (83.64 mg, 319.89 μmol) in single portion and stirred for 10 hr at 22 °C. All the volatile matters were evaporated under high vacuum pump and the crude residue thus obtained, was purified by flash column chromatography (gradient: 0-7% MeOH in DCM) to afford **31** (0.126 g, 78% yield) as white foam. <sup>1</sup>H NMR (600 MHz, DMSO-*d*<sub>6</sub>) δ 8.91 (s, 1H), 8.42 (s, 1H), 8.24 (s, 1H), 5.94 (s, 1H), 5.79 (d, *J* = 4.4 Hz, 1H), 4.42 (s, 1H), 4.28 (d, *J* = 4.5 Hz, 1H), 4.13 (d, *J* = 11.0 Hz, 1H), 4.02 – 3.93 (m, 2H), 3.89 – 3.79 (m, 4H), 3.26 (td, *J* = 11.9, 2.2 Hz, 2H), 3.20 (s, 3H), 3.13 (s, 3H), 2.77 (tt, *J* = 11.1, 3.8 Hz, 1H), 2.68 (hept, *J* = 6.5 Hz, 2H), 1.77 – 1.70 (m, 2H), 1.58 – 1.43 (m, 5H), 1.30 – 1.10 (m, 17H), 0.85 (t, *J* = 7.0 Hz, 3H) ppm. <sup>13</sup>C NMR (151 MHz, DMSO-*d*<sub>6</sub>) δ 159.2, 158.0, 152.1, 150.4, 139.4, 125.6, 86.2, 85.3, 78.9, 71.4, 70.5, 70.4, 66.1, 66.0, 61.8, 54.1, 40.7, 34.6, 31.3, 29.0, 29.0, 29.0, 29.0, 28.9, 28.9, 28.7, 26.9, 26.1, 22.1, 14.0 ppm. HRMS calcd. for C<sub>35</sub>H<sub>60</sub>N<sub>7</sub>O<sub>6</sub> [M + H]<sup>+</sup> 658.4656, found 658.4641.

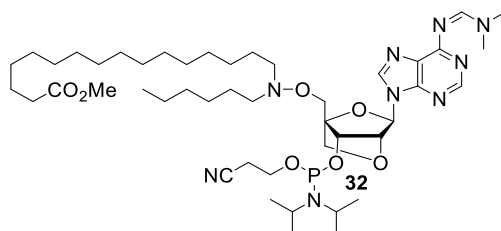

***Methyl-16-[[[(4R,6R)-7-[2-cyanoethoxy(dimethylamino)phosphanyl]oxy-6-[6-[(Z)-dimethyl aminomethyleneamino]purin-9-yl]-2,5-dioxabicyclo[2.2.1]heptan-4-yl]methoxy-hexyl-amino]hexadecanoate (**32**):*** To a clear solution of **30** (0.28 g, 398.90 μmol) in DCM (15 mL) was added NMI (65.50 mg, 797.79 μmol, 63.59 μL) and DIPEA (257.77 mg, 1.99 mmol, 347.39 μL) in single portions. After stirring the reaction mixture for 5 minutes at 22 °C, 2-cyanoethyl-*N,N*-diisopropylchlorophosphoramidite (188.82 mg, 797.79 μmol) was added and continued stirring for 1 hr and TLC was checked. Starting material was consumed and reaction mixture was diluted with DCM (15 mL). DCM layer was washed with 10% NaHCO<sub>3</sub> (2 x 20 mL) solution, and brine (20 mL). Organic layer was separated, dried over anhydrous Na<sub>2</sub>SO<sub>4</sub>, filtered and filtrate was evaporated at 36°C to afford crude compound which was purified by flash chromatography (0-3% MeOH in DCM containing 3% TEA) to afford **32** (0.29 g, 80% yield) as white foam. <sup>1</sup>H NMR (600 MHz, CD<sub>3</sub>CN) δ 8.90 (s, 1H), 8.40 (d, *J* = 3.5 Hz, 1H), 8.07 (d, *J* = 6.6 Hz, 1H), 5.99 (d, *J* = 5.4 Hz, 1H), 5.45 (s, 1H), 4.80 – 4.55 (m, 1H), 4.45 – 4.37 (m, 1H), 4.17 (dd, *J* = 11.2, 5.8 Hz, 1H), 4.12 – 3.99 (m, 2H), 3.92 (dd, *J* = 7.9, 3.5 Hz, 1H), 3.83 – 3.69 (m, 2H), 3.60 – 3.48 (m, 5H), 3.17 (d, *J* = 11.2 Hz, 6H), 2.82 – 2.45 (m, 10H), 2.27 (t, *J* = 7.5 Hz, 2H), 1.61 – 1.49 (m, 8H), 1.35 – 1.20 (m, 42H), 1.13 (dd, *J* = 6.8, 2.3 Hz, 7H), 1.03 (d, *J* = 6.7 Hz, 3H), 1.01 – 0.94 (m, 9H), 0.87 (dt, *J* = 7.1, 3.4 Hz, 3H) ppm. <sup>13</sup>C NMR (151 MHz, CD<sub>3</sub>CN) δ 174.8, 160.6, 159.0, 159.0, 153.3, 151.8, 151.7, 139.9, 139.8, 127.3, 127.3, 119.2, 87.5, 87.4, 87.4, 87.4, 87.3, 87.3, 79.4, 79.4, 73.4, 73.4, 73.3, 72.7, 72.7, 70.1, 69.9, 60.0, 59.9, 59.9, 59.7, 59.6, 59.4, 59.1, 59.1, 55.3, 51.8, 49.1, 47.0, 46.0, 45.9, 44.1, 44.0, 44.0, 43.9, 41.5, 39.4, 35.2, 34.5, 32.5, 30.3, 30.3, 30.3, 30.3, 30.2, 30.2, 30.0, 29.8, 28.1, 28.1, 27.9, 27.9, 27.8, 27.8, 25.7, 24.8, 24.8, 24.7, 24.6, 24.6, 23.4, 23.4, 23.2, 23.1, 23.1, 23.1, 21.0, 21.0, 20.1, 20.9, 20.9, 20.6, 20.6, 14.4, 12.2

ppm.  $^{31}\text{P}$  NMR (243 MHz,  $\text{CD}_3\text{CN}$ )  $\delta$  148.43, 148.37 ppm. HRMS calcd. for  $\text{C}_{46}\text{H}_{81}\text{N}_9\text{O}_7\text{P}$  [ $\text{M} + \text{H}$ ] $^+$  902.5997, found 902.5977.

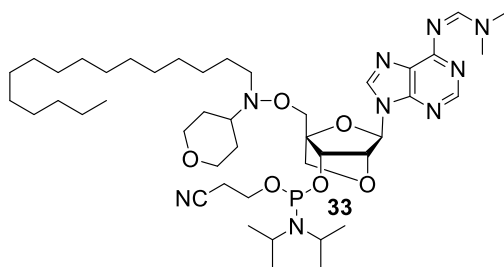

***N'*-[9-[(4*R*,6*R*)-7-[2-cyanoethoxy-(diisopropylamino)phosphanyl]oxy-4-[[hexadecyl(tetrahydrofuran-4-yl)amino]oxymethyl]-2,5-dioxabicyclo[2.2.1]heptan-6-yl]purin-6-yl]-*N,N*-dimethylformamidine (33):** To a clear solution of **31** (0.2 g, 304.00  $\mu\text{mol}$ ) in DCM (20 mL) was added NMI (49.92 mg, 608.01  $\mu\text{mol}$ , 48.46  $\mu\text{L}$ ) and DIPEA (196.45 mg, 1.52 mmol, 264.75  $\mu\text{L}$ ) in single portions. After stirring the reaction mixture for 5 minutes at 22  $^\circ\text{C}$ , 2-cyanoethyl-*N,N*-diisopropylchlorophosphoramidite (143.90 mg, 608.01  $\mu\text{mol}$ , 135.76  $\mu\text{L}$ ) was added and continued stirring for 1 hr and TLC was checked. Starting material was consumed and reaction mixture was diluted with DCM (15 mL). DCM layer was washed with 10%  $\text{NaHCO}_3$  (2 x 25 mL) solution, and brine (30 mL). Organic layer was separated, dried over anhydrous  $\text{Na}_2\text{SO}_4$ , filtered and filtrate was evaporated at 36 $^\circ\text{C}$  to afford crude compound which was purified by flash chromatography (0-3% MeOH in DCM containing 3% TEA) to afford **33** (0.211 g, 81% yield) as white foam.  $^1\text{H}$  NMR (600 MHz,  $\text{CD}_3\text{CN}$ )  $\delta$  8.90 (s, 1H), 8.41 (d,  $J = 3.4$  Hz, 1H), 8.08 (d,  $J = 5.3$  Hz, 1H), 5.99 (s, 1H), 4.77 – 4.64 (m, 1H), 4.46 – 4.35 (m, 1H), 4.18 – 3.99 (m, 4H), 3.91 (tt,  $J = 10.7, 4.5$  Hz, 4H), 3.83 – 3.68 (m, 2H), 3.62 – 3.44 (m, 3H), 3.31 (tdt,  $J = 12.1, 8.2, 2.2$  Hz, 2H), 3.18 (s, 3H), 3.16 (s, 3H), 2.85 – 2.70 (m, 4H), 2.60 (t,  $J = 6.0$  Hz, 1H), 2.55 – 2.44 (m, 2H), 1.79 (s, 1H), 1.58 (qdd,  $J = 15.2, 8.3, 3.2$  Hz, 2H), 1.34 – 1.20 (m, 37H), 1.13 (dd,  $J = 6.8, 1.6$  Hz, 7H), 1.04 – 0.94 (m, 8H), 0.88 (t,  $J = 7.0$  Hz, 3H) ppm.  $^{13}\text{C}$  NMR (151 MHz,  $\text{CD}_3\text{CN}$ )  $\delta$  160.6, 159.0, 159.0, 153.3, 151.8, 151.7, 139.8, 127.3, 127.3, 119.3, 119.3, 87.6, 87.5, 87.5, 87.5, 87.4, 87.3, 79.4, 79.4, 79.3, 79.3, 73.4, 73.2, 73.2, 72.6, 72.5, 70.8, 70.7, 67.5, 67.4, 67.4, 63.4, 63.3, 59.9, 59.7, 59.5, 59.4, 59.1, 59.1, 55.5, 55.5, 55.3, 49.5, 46.0, 45.9, 44.1, 44.0, 44.0, 43.9, 41.5, 35.2, 32.6, 30.4, 30.4, 30.3, 30.3, 30.3, 30.2, 30.1, 28.2, 28.1, 27.6, 27.5, 27.2, 24.8, 24.8, 24.7, 24.6, 24.6, 23.4, 23.2, 23.1, 23.1, 23.1, 21.0, 21.0, 21.0, 21.0, 14.4 ppm.  $^{31}\text{P}$  NMR (243 MHz,  $\text{CD}_3\text{CN}$ )  $\delta$  148.31, 148.27 ppm. HRMS calcd. for  $\text{C}_{44}\text{H}_{77}\text{N}_9\text{O}_6\text{P}$  [ $\text{M} + \text{H}$ ] $^+$  858.5734, found 858.5741.

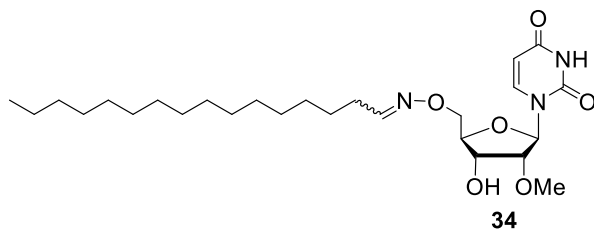

***1*-[(2*R*,5*R*)-5-[(hexadecylideneamino)oxymethyl]-4-hydroxy-3-methoxy-tetrahydrofuran-2-yl]pyrimidine-2,4-dione (34):** To a solution of **4c** (1 g, 1.64 mmol) in THF (15 mL) at 25  $^\circ\text{C}$ , tetrabutylammonium fluoride (433.02 mg, 1.64 mmol) was added slowly in single portion and then stirred for 12 hr. Volatile matters were removed in high vacuum pump and crude residue thus obtained was purified by flash column chromatography (gradient: 20-60% EtOAc in hexane) to afford **34** (0.75 g, 92% yield).  $^1\text{H}$  NMR (500 MHz,  $\text{CDCl}_3$ )  $\delta$  9.04 (d,  $J = 10.5$  Hz, 1H), 7.73 (dd,  $J = 19.8, 8.1$  Hz, 1H), 7.40 (t,  $J = 6.2$  Hz, 0.5H), 6.71 (t,  $J = 5.4$  Hz, 0.5H), 5.93 (t,  $J = 2.3$  Hz, 1H), 5.68 (ddd,  $J = 11.0, 8.1, 1.7$  Hz, 1H), 4.48 (ddd,  $J = 36.9, 12.5, 2.3$  Hz, 1H), 4.32 (ddd,  $J = 31.7, 12.6, 3.1$  Hz, 1H), 4.21 (tdd,  $J = 7.9, 5.2, 2.3$  Hz, 1H), 4.12 (dtd,  $J = 7.8, 5.6, 2.7$  Hz, 1H), 3.75 (ddd,  $J = 9.2, 5.2, 2.2$  Hz, 1H),

3.62 (d,  $J = 5.5$  Hz, 3H), 2.72 (dd,  $J = 8.3, 5.1$  Hz, 1H), 2.30 (td,  $J = 7.6, 5.4$  Hz, 1H), 2.22 – 2.13 (m, 1H), 1.47 (q,  $J = 7.2$  Hz, 2H), 1.25 (s, 25H), 0.87 (t,  $J = 6.9$  Hz, 3H) ppm.  $^{13}\text{C}$  NMR (101 MHz,  $\text{CDCl}_3$ )  $\delta$  163.2, 163.1, 153.1, 152.3, 150.2, 150.1, 139.8, 139.6, 102.2, 102.2, 87.8, 87.7, 83.9, 83.7, 83.2, 83.2, 72.1, 71.8, 68.9, 68.7, 58.9, 58.9, 32.1, 29.8, 29.8, 29.8, 29.7, 29.6, 29.6, 29.5, 29.4, 29.3, 26.8, 26.3, 26.1, 22.8, 14.2 ppm. HRMS calcd. for  $\text{C}_{26}\text{H}_{46}\text{N}_3\text{O}_6$   $[\text{M} + \text{H}]^+$  496.3387, found 496.3389.

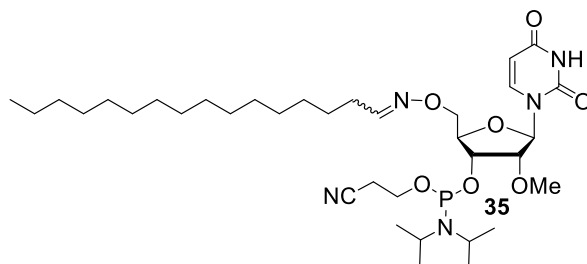

**3-[(diisopropylamino)-(2R,5R)-5-(2,4-dioxypyrimidin-1-yl)-2-[(hexadecylideneamino)oxy methyl]-4-methoxy-tetrahydrofuran-3-yl]oxy-phosphanyl]oxypropanenitrile (35):** To a clear solution of **34** (0.7 g, 1.41 mmol) in DCM (15 mL), DIPEA (0.92 g, 7.06 mmol, 1.24 mL) and NMI (0.41 g, 4.94 mmol, 0.40 mL) were added at 25 °C. To this reaction mixture, was added 2-cyanoethyl-*N,N*-diisopropylchlorophosphoramidite (0.704 g, 2.82 mmol, 0.66 mL) slowly after 5 minutes and stirred for 1.5 h. Reaction mixture was diluted with DCM (20 mL) and quenched with 10%  $\text{NaHCO}_3$  solution (20 mL). Organic layer was separated, dried on anhydrous  $\text{Na}_2\text{SO}_4$ , filtered and filtrate was evaporated to dryness. The crude compound was thus obtained was purified by flash column chromatography (gradient: 10-50% EtOAc in hexane) to afford **35** (0.75 g, 76% yield) as transparent gum.  $^1\text{H}$  NMR (400 MHz,  $\text{CDCl}_3$ )  $\delta$  9.15 (s, 1H), 7.72 (ddd,  $J = 15.7, 8.2, 5.7$  Hz, 1H), 7.41 (dt,  $J = 10.9, 6.2$  Hz, 0.5H), 6.71 (dt,  $J = 7.1, 5.3$  Hz, 0.5H), 5.97 (dd,  $J = 6.5, 3.3$  Hz, 1H), 5.77 – 5.48 (m, 1H), 4.56 – 4.18 (m, 4H), 4.00 – 3.70 (m, 3H), 3.68 – 3.59 (m, 2H), 3.55 (d,  $J = 4.0$  Hz, 1.6H), 3.51 (s, 1.4H), 2.74 – 2.55 (m, 2H), 2.38 – 2.14 (m, 2H), 1.48 (qd,  $J = 7.2, 4.7, 2.9$  Hz, 2H), 1.33 – 1.13 (m, 38H), 0.95 – 0.69 (m, 3H) ppm.  $^{13}\text{C}$  NMR (151 MHz,  $\text{CDCl}_3$ )  $\delta$  163.5, 163.5, 153.0, 153.0, 152.2, 150.4, 150.4, 150.3, 150.3, 140.0, 139.9, 139.7, 139.6, 117.8, 117.8, 117.6, 102.3, 102.3, 102.2, 88.0, 87.9, 87.9, 87.7, 83.3, 83.3, 83.1, 83.1, 83.0, 82.9, 82.5, 82.5, 82.5, 82.4, 82.3, 82.2, 72.3, 72.0, 71.9, 71.7, 59.0, 59.0, 58.9, 58.9, 58.7, 58.7, 58.7, 58.5, 58.4, 58.4, 58.1, 58.0, 53.5, 43.5, 43.5, 43.4, 43.4, 43.3, 43.3, 32.0, 29.8, 29.8, 29.7, 29.7, 29.7, 29.6, 29.6, 29.6, 29.6, 29.5, 29.5, 29.5, 29.5, 29.4, 29.4, 29.3, 29.3, 26.8, 26.7, 26.3, 26.3, 26.2, 26.2, 24.7, 24.7, 24.7, 24.7, 24.6, 22.8, 20.5, 20.5, 20.5, 20.5, 20.4, 20.4, 14.2 ppm.  $^{31}\text{P}$  NMR (162 MHz,  $\text{CDCl}_3$ )  $\delta$  151.54, 151.3, 150.9 ppm. HRMS calcd. for  $\text{C}_{35}\text{H}_{63}\text{N}_5\text{O}_7\text{P}$   $[\text{M} + \text{H}]^+$  696.4465, found 696.4449.

## Synthesis of AOCC modified oligonucleotides from AOCC-conjugate building blocks and AOCC precursors

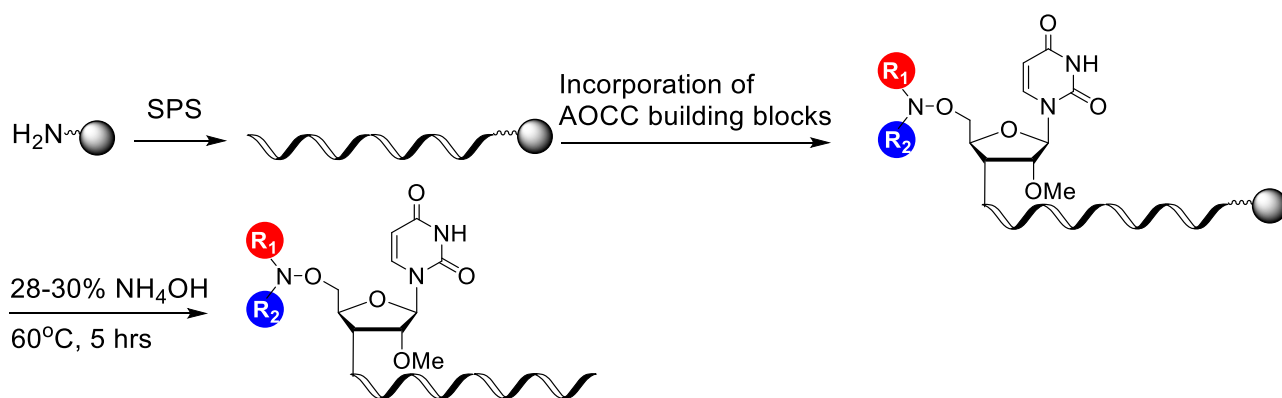

**Figure S1:** Incorporation of AOCC modified amidites at the 5'-end of oligonucleotides. (SPS: Solid-Phase Synthesis)

**Oligonucleotide Synthesis:** Oligonucleotides were synthesized on either an ABI-394 at 1- $\mu$ mol scale using universal supports or a K&A H-8-SE at 40- $\mu$ mol scale using universal supports. A solution of 0.25 M 5-(*S*-ethylthio)-1*H*-tetrazole in acetonitrile ( $\text{CH}_3\text{CN}$ ) was used as the activator. The solutions of commercially available phosphoramidites and synthesized phosphoramidities were used at 0.15 M in anhydrous  $\text{CH}_3\text{CN}$  or  $\text{CH}_2\text{Cl}_2$ . The oxidizing reagent was 0.02 M  $\text{I}_2$  in THF/pyridine/ $\text{H}_2\text{O}$ . *N,N*-Dimethyl-*N'*-(3-thioxo-3*H*-1,2,4-dithiazol-5-yl)methanimidamide (DDTT), 0.1 M in pyridine, was used as the sulfurizing reagent. The detritylation reagent was 3% dichloroacetic acid in  $\text{CH}_2\text{Cl}_2$ . Waiting time for coupling, capping, oxidation, and sulfurization step are 450s, 25s, 80s and 300s respectively. After completion of the automated synthesis, the oligonucleotide was manually released from support and deprotected using 28-30% ammonium hydroxide solution at 60 °C for 5h. The oligonucleotide containing **V** (5'-folate-C16) was pre-treated using 1 M aqueous piperidine at room temperature for 24 hr followed by ammonium hydroxide solution at 55 °C for 6 hr. After filtration through a 0.45- $\mu$ m nylon filter, oligonucleotides were purified by ion exchange and/or reverse phase column chromatography. For ion exchange, preparative HPLC custom packed with TSKGel SuperQ-5PW(20) (Sigma) using an appropriate gradient of mobile phase (buffer A: 20 mM sodium phosphate, 15%  $\text{CH}_3\text{CN}$ , pH 8.5; buffer B: 1 M NaBr, 20 mM sodium phosphate, 15%  $\text{CH}_3\text{CN}$ , pH 8.5) and desalted using size-exclusion chromatography using a custom packed with Sephadex G25 (GE Healthcare) and water as an eluent. For reverse phase, preparative HPLC (prep RP-HPLC, Agilent, ZORBAX 300SB-C18 5 $\mu$ m 9.4x250mm) using an appropriate gradient of mobile phase (buffer A: 50 mM TEAA, 3%  $\text{CH}_3\text{CN}$ ; buffer B 50 mM TEAA, 80%  $\text{CH}_3\text{CN}$ ) and desalted using size-exclusion chromatography using a custom packed with Sephadex G25 (GE Healthcare) and water as an eluent. Triethyl ammonium cation was displaced by Na with an excess of 0.1M AcONa solution, and a second desalting process. Oligonucleotides were then quantified by measuring the absorbance at 260 nm. Extinction coefficients were calculated using the following extinction coefficients for each residue: A, 13.86; T/U, 7.92; C, 6.57; and G, 10.53  $\text{M}^{-1}\text{cm}^{-1}$ . The purity and identity of modified ONs were verified by analytical reRP-HPLC chromatography and mass spectrometry, respectively.

**Table S2:** Sequences and mass spectroscopy characterization of target sequence conjugates using AOCC-conjugated building blocks

| Target | Sense Strand | Sequence 5'-3'                               | Chemistry  | Mass (M-H) <sup>-</sup> |         |
|--------|--------------|----------------------------------------------|------------|-------------------------|---------|
|        |              |                                              |            | Calcd.                  | Obs.    |
| SOD1   | ON1          | <b>I</b> •a•uuuuAa <i>UCCucacucua</i> •a•a   | oxime      | 7072.99                 | 7071.22 |
| SOD1   | ON2          | <b>II</b> •a•uuuuAa <i>UCCucacucua</i> •a•a  | bis-homo   | 7131.12                 | 7129.65 |
| SOD1   | ON3          | <b>III</b> •a•uuuuAa <i>UCCucacucua</i> •a•a | bis-hetero | 7263.31                 | 7261.77 |
| SOD1   | ON4          | <b>IV</b> •a•uuuuAa <i>UCCucacucua</i> •a•a  | bis-hetero | 7431.65                 | 7429.90 |
| βcat   | ON5          | <b>V</b> •a•CuGuUgGAUuGaUuCgA•a•A            | bis-hetero | 7589.3                  | 7588.07 |
| Apo-B  | ON6          | <b>VI</b> •g•UgAcAaAUuGgGcAuC•a•A            | bis-hetero | 8920.0                  | 8916.50 |

Uppercase italicized and lowercase letters represent 2'-F and 2'-OMe nucleosides, respectively. Phosphorothioate linkages are indicated by the “●” symbol. AOCC-modified building blocks in the context of 2'-OMe-uridine are **I** (5'-C16 oxime), **II** (5'-bis-C10), **III** (5'-lipoic acid-C16), **IV** (5'-cyclopropyldilinoylel-Me), **V** (5'-folate-C16), and **VI** (5'-triGalNAc-C16).

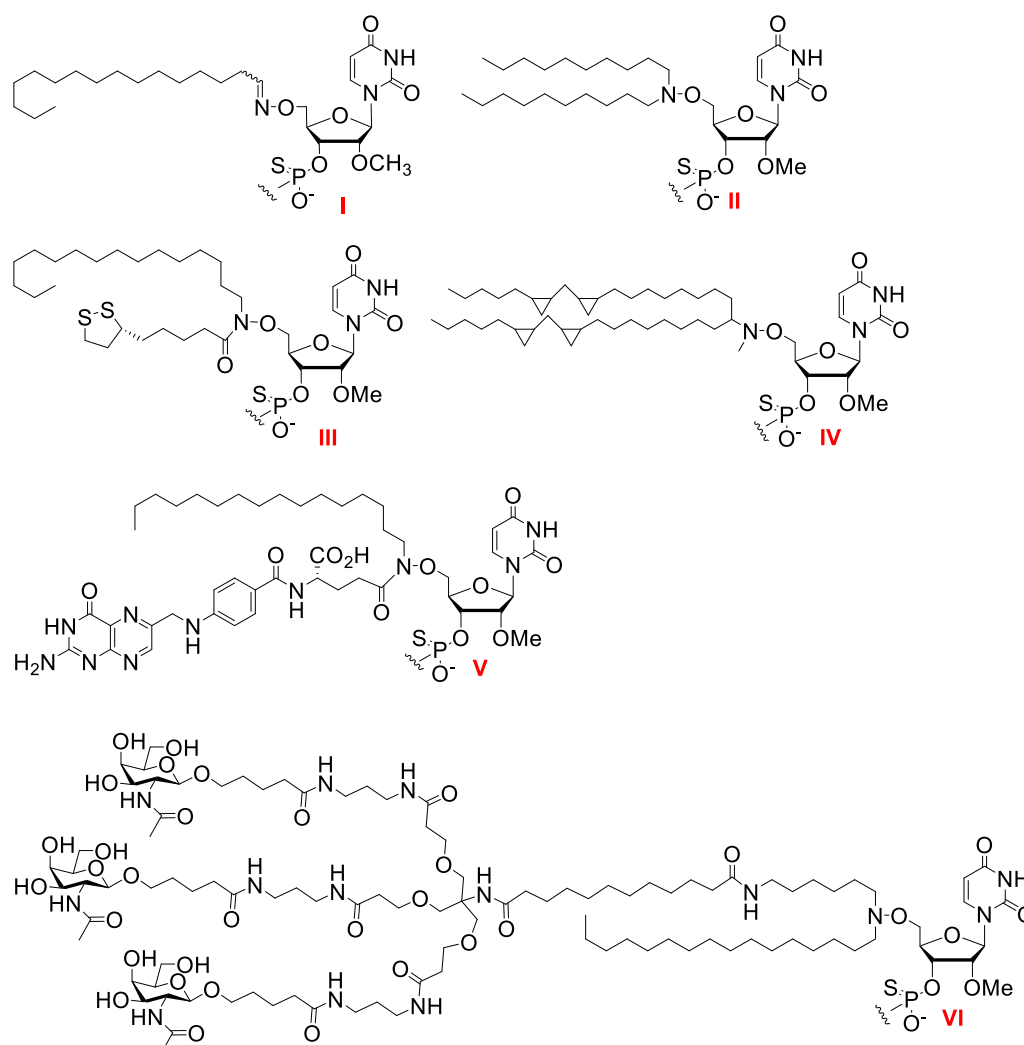

**Figure S2:** AOCC conjugates incorporated at the 5'-end of sense strands

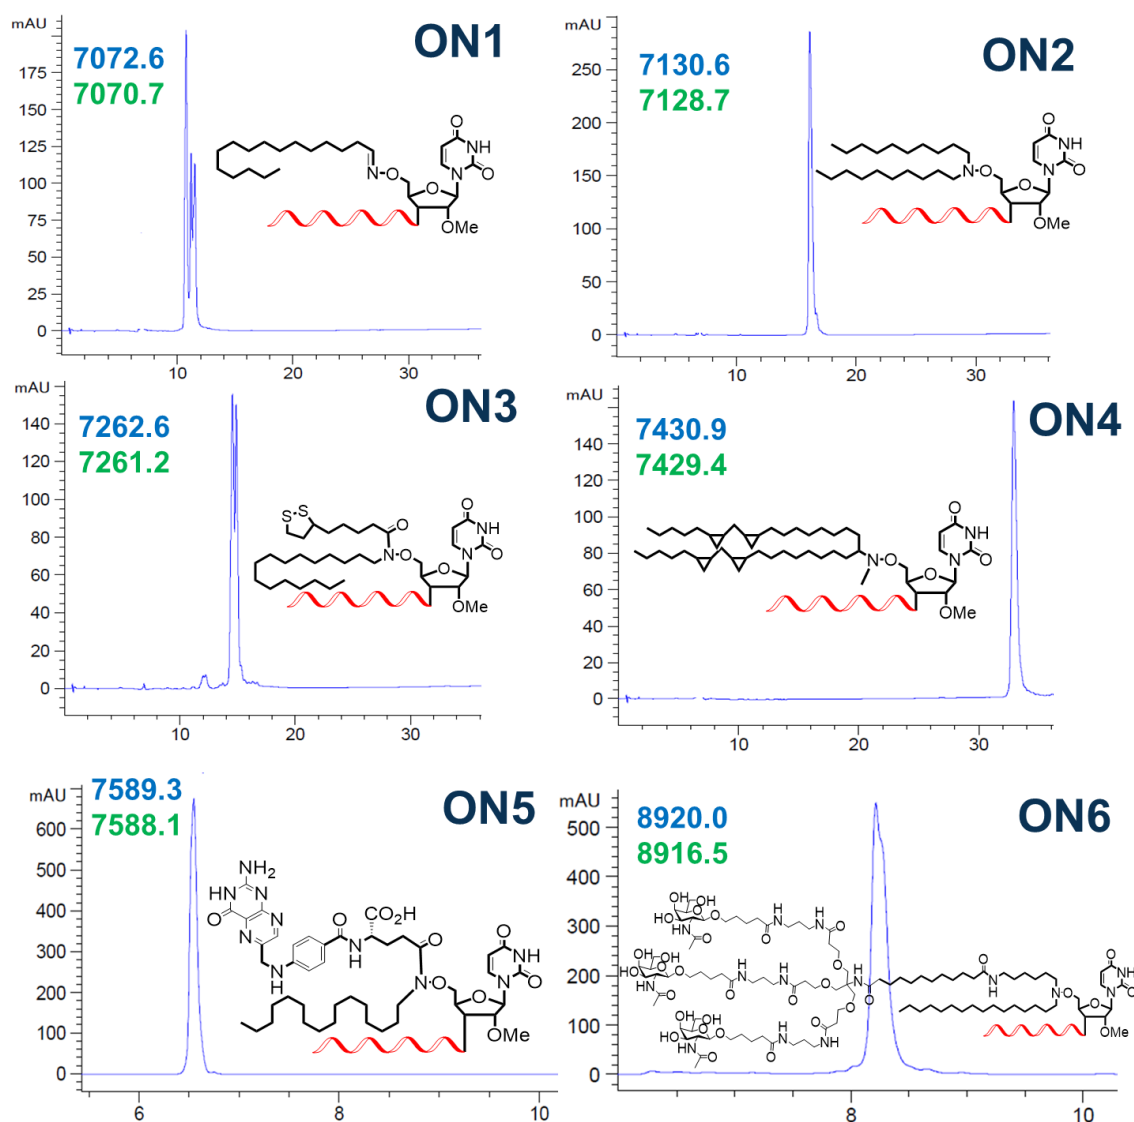

**Figure S3:** HPLC profiles of AOCC-modified oligonucleotides with calculated (blue) and observed (green) masses for of AOCC-modified oligonucleotides ON1-ON6 respectively. The multiplicity of peaks is due to diastereomeric chiral phosphorothioates and/or oxime rotomers.

#### HPLC Conditions:

For **ON1-ON4** buffer A: 95mM Hexafluoroisopropanol, 16.3mM TEA, 0.05mM EDTA; buffer B: MeOH gradient 35 to 70% B for 31 min. For **ON5** and **ON6**: Buffer A – 16mM TEA, 200mM HFIP; Buffer B – MeOH; 9.6 min gradient going from 0-60% Buffer B; column heated to 75 °C.

Sep15-2021.30.fid  
trigalnac OH

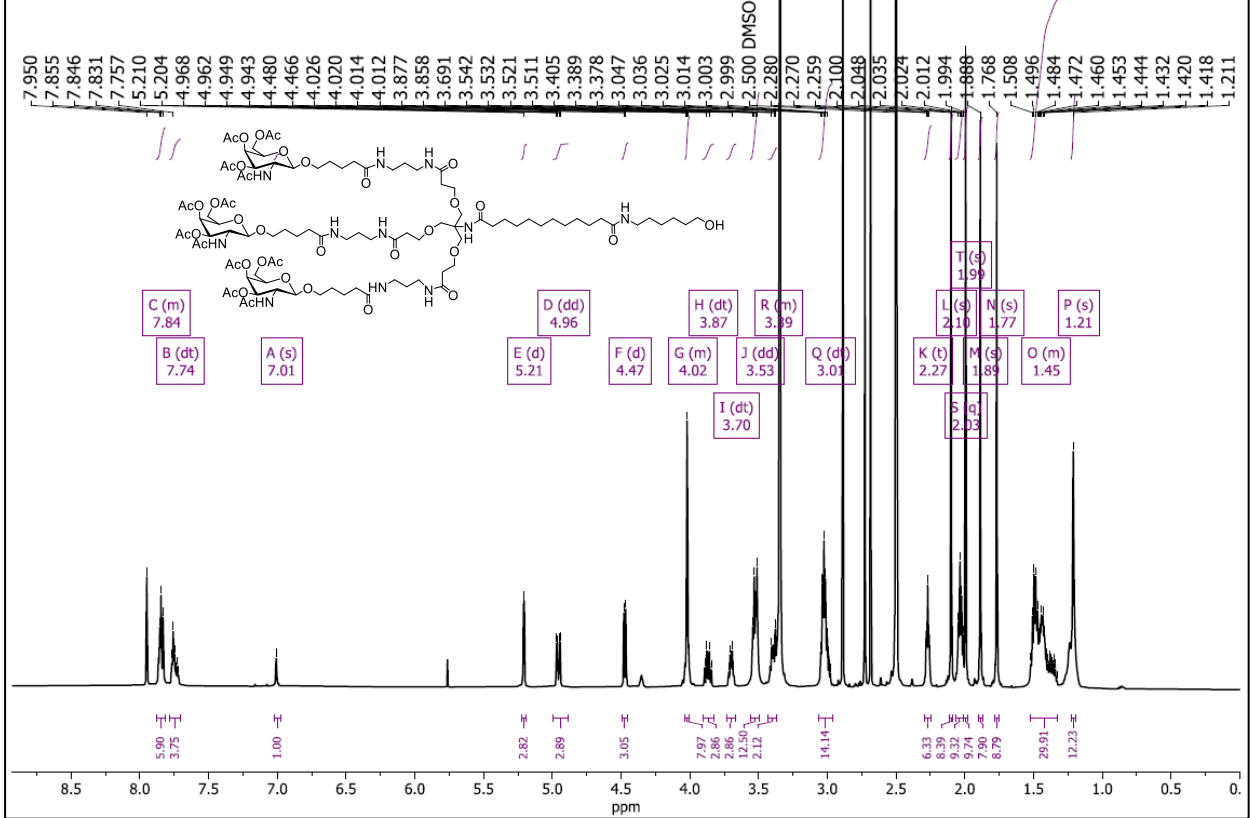

**<sup>1</sup>H NMR of 2S (600 MHz, DMSO-d<sub>6</sub>)**

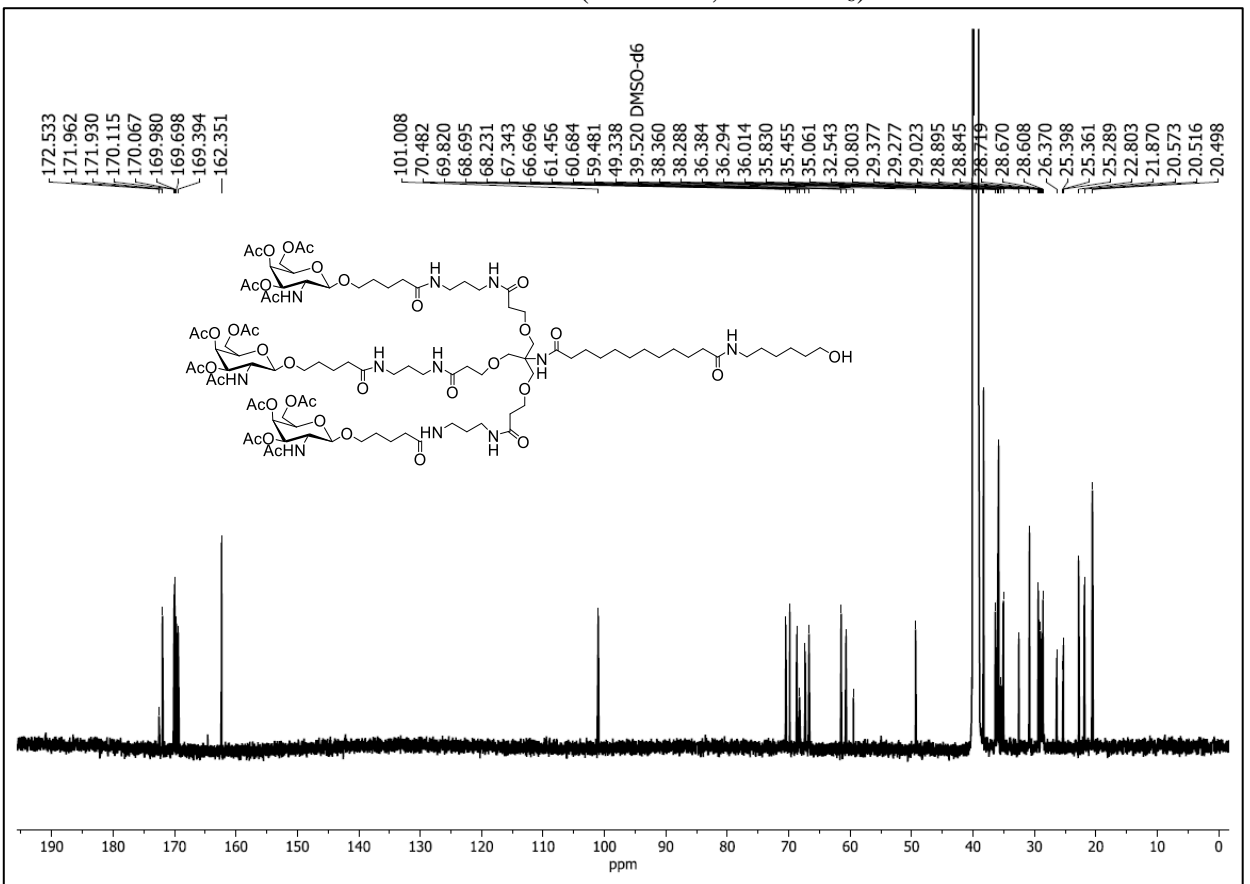

**<sup>13</sup>C NMR of compound 2S (151 MHz, DMSO-d<sub>6</sub>)**



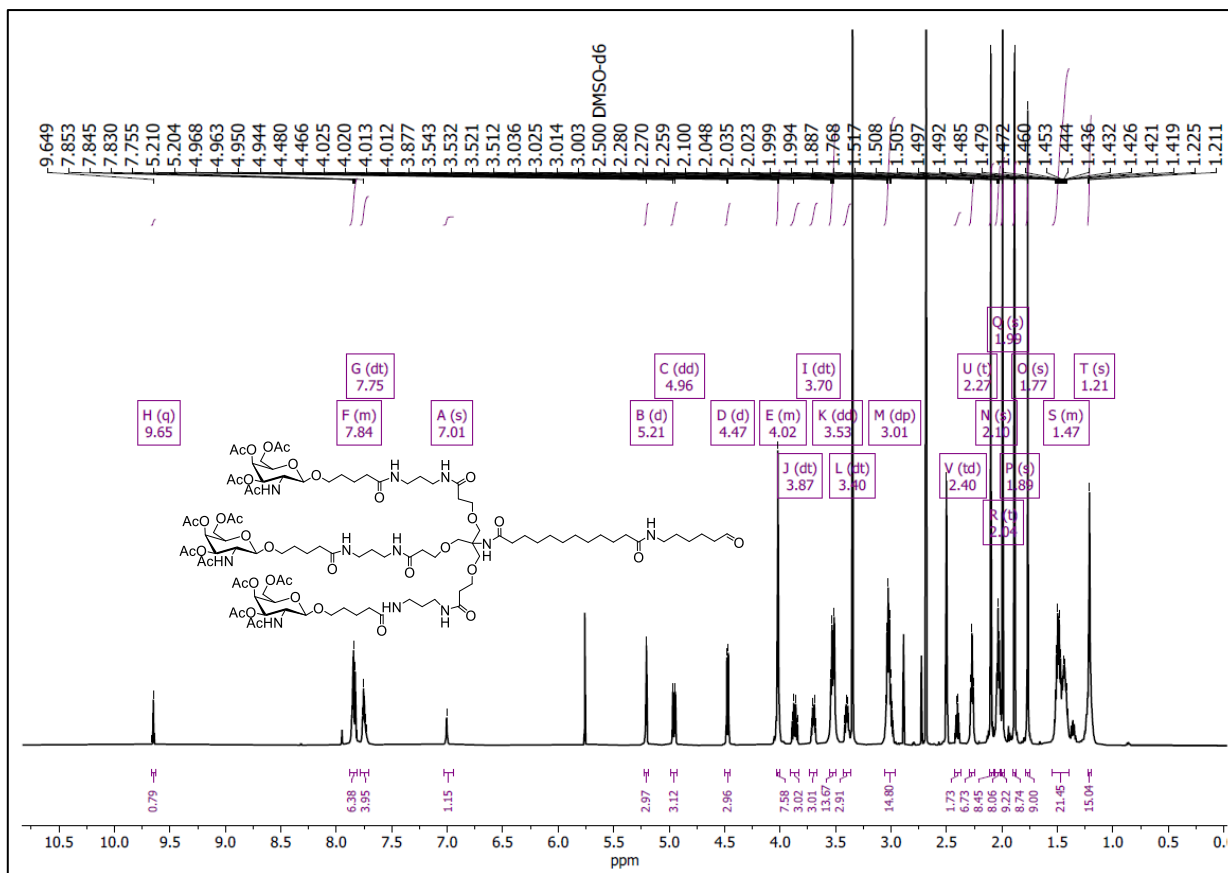

**<sup>1</sup>H NMR of compound 3S (600 MHz, DMSO-d<sub>6</sub>)**

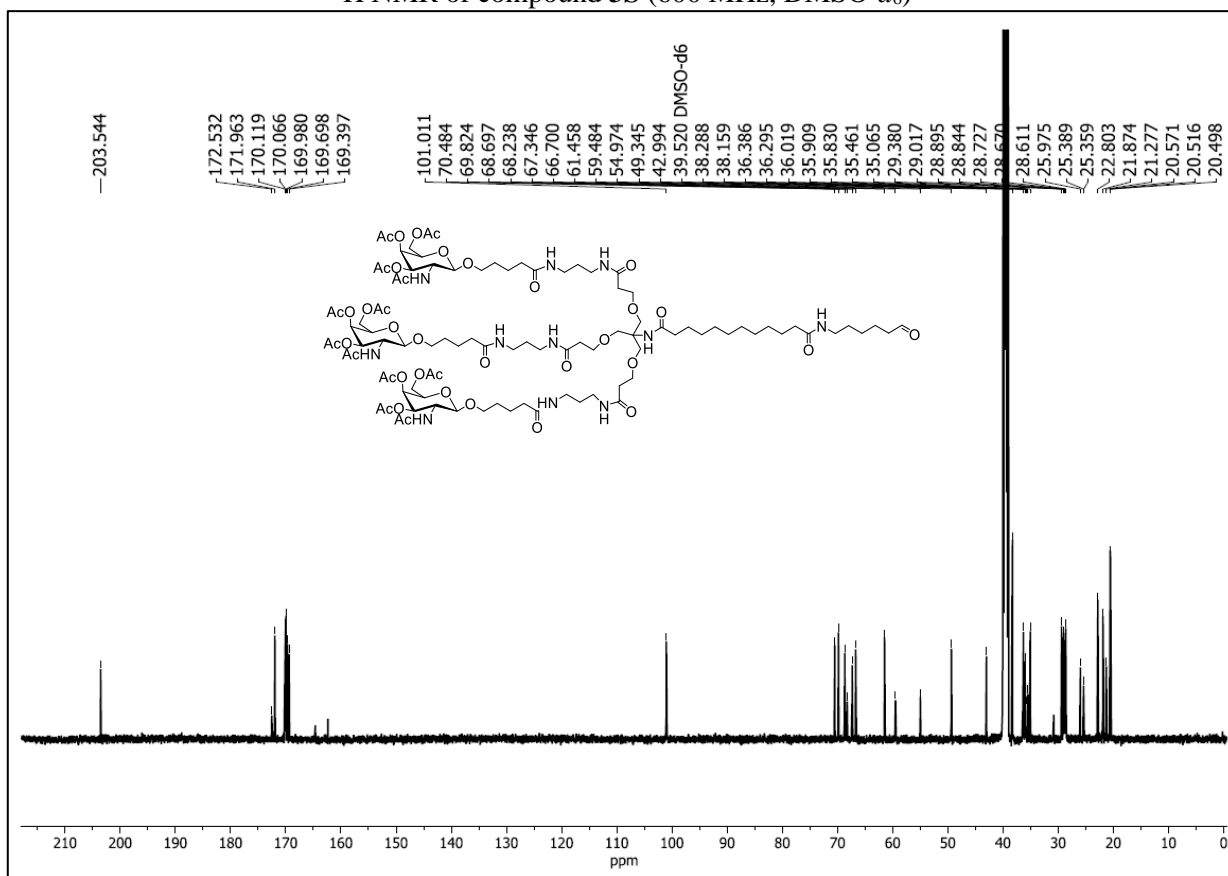

**<sup>13</sup>C NMR of compound 3S (151 MHz, DMSO-d<sub>6</sub>)**

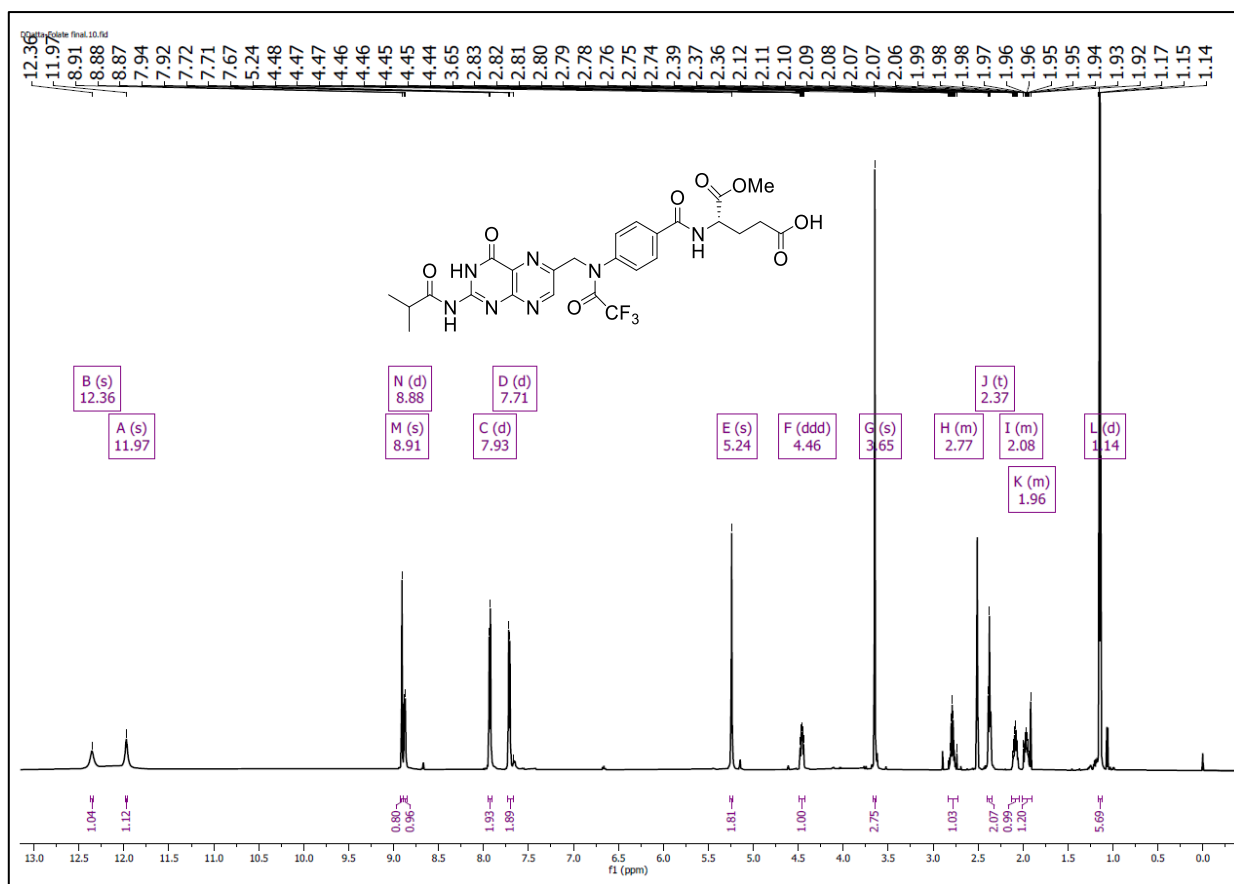

$^1\text{H}$  NMR of compound **7S** (600 MHz,  $\text{DMSO-}d_6$ )

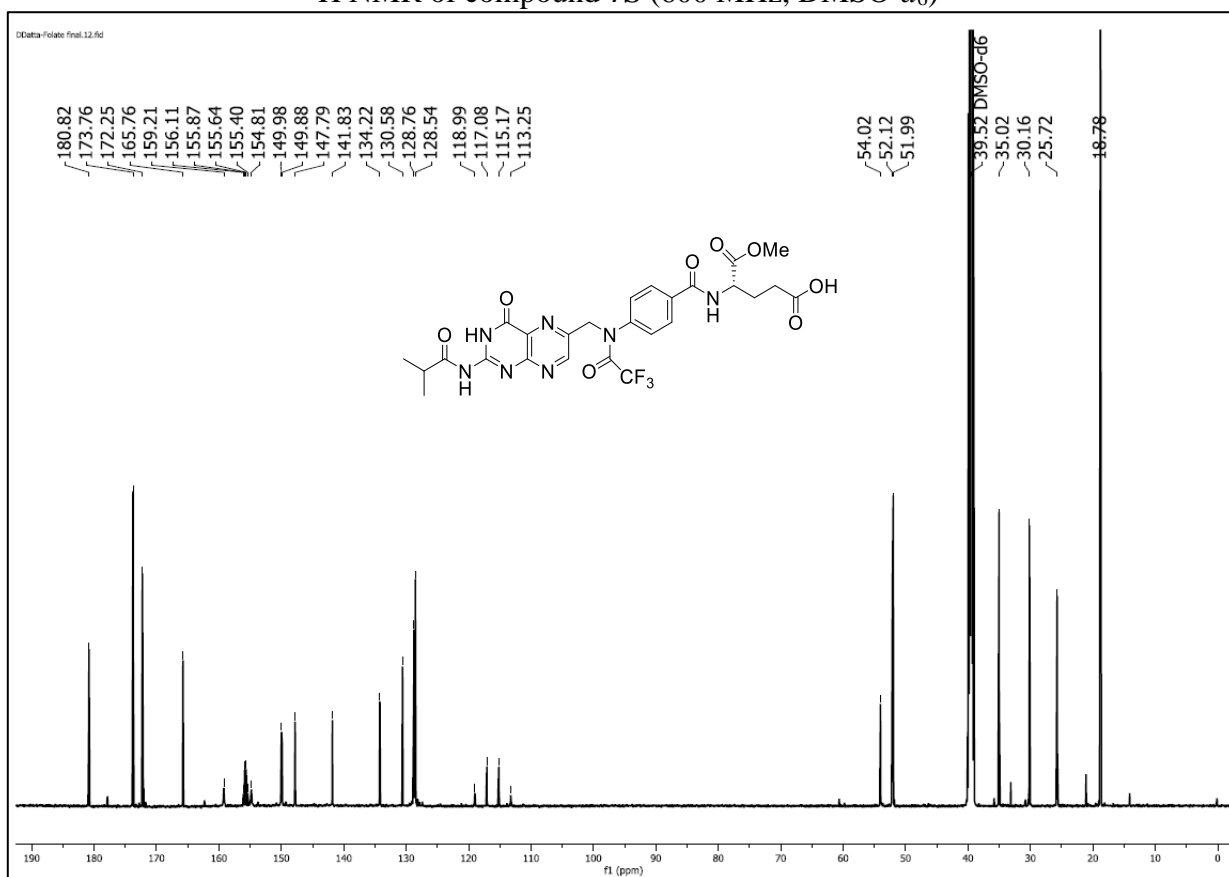

$^{13}\text{C}$  NMR of compound **7S** (151 MHz,  $\text{DMSO-}d_6$ )

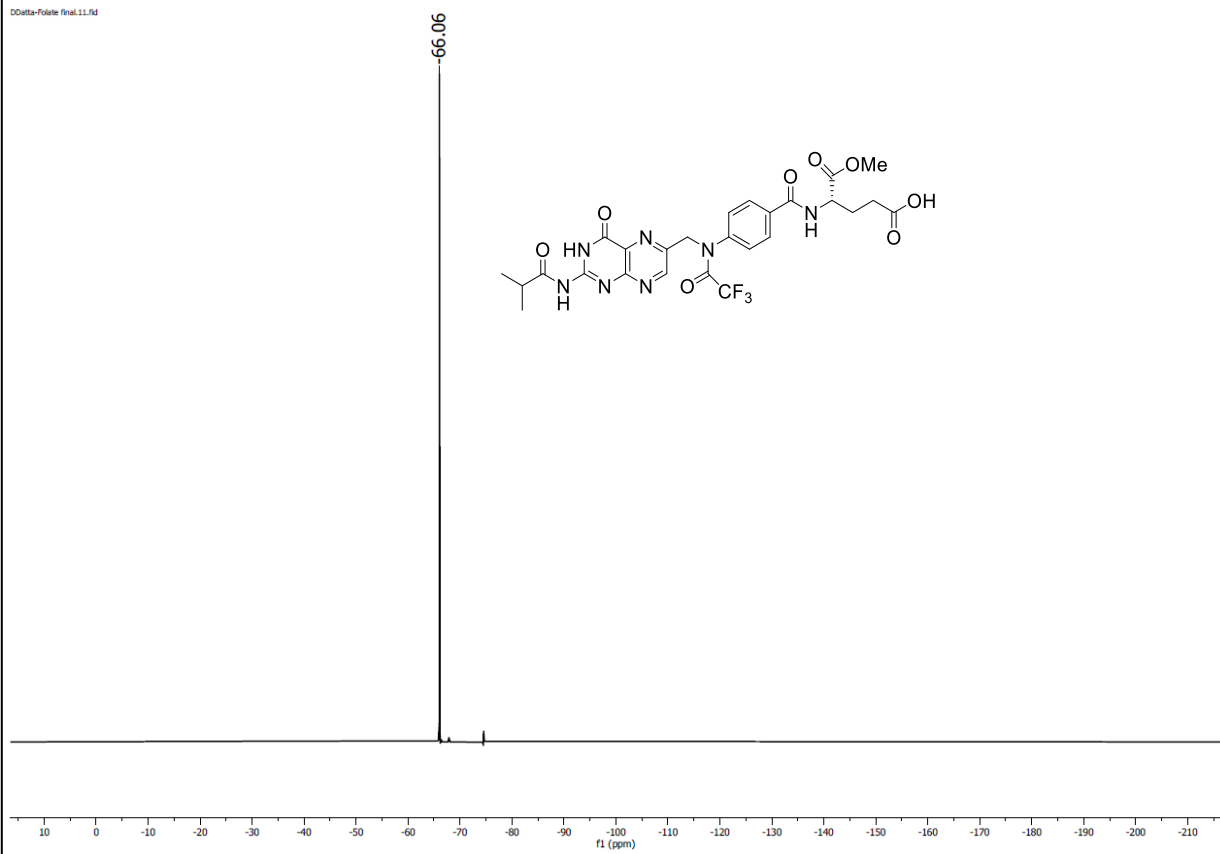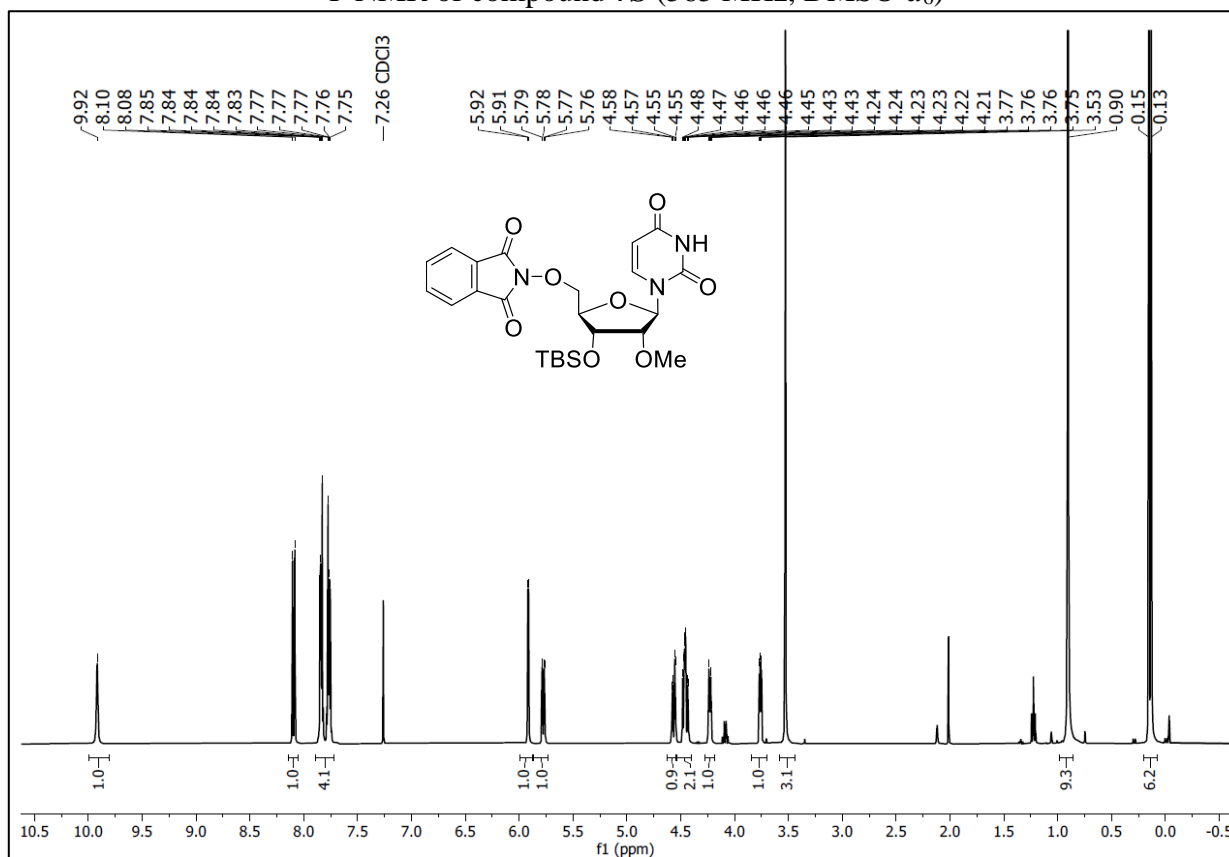

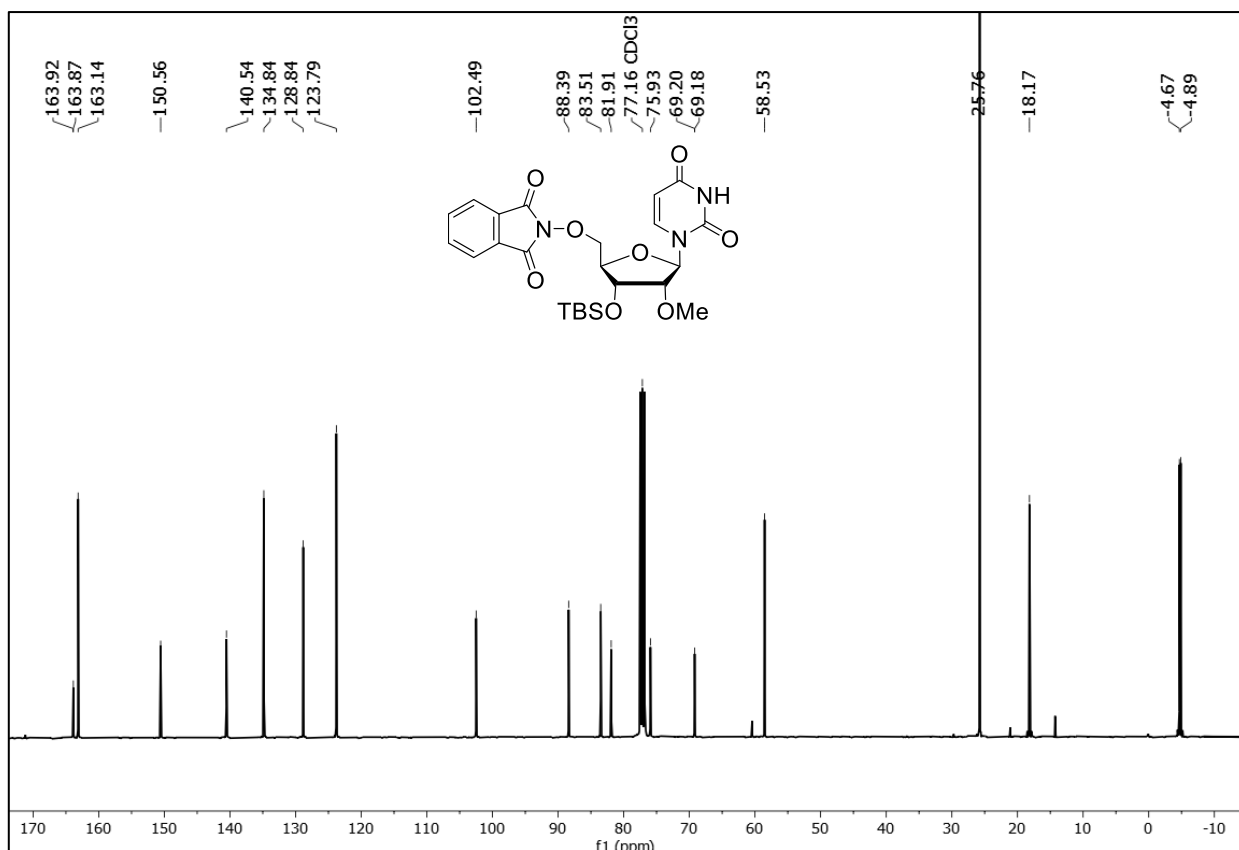

$^{13}\text{C}$  NMR of compound 2 (101 MHz, CDCl<sub>3</sub>)

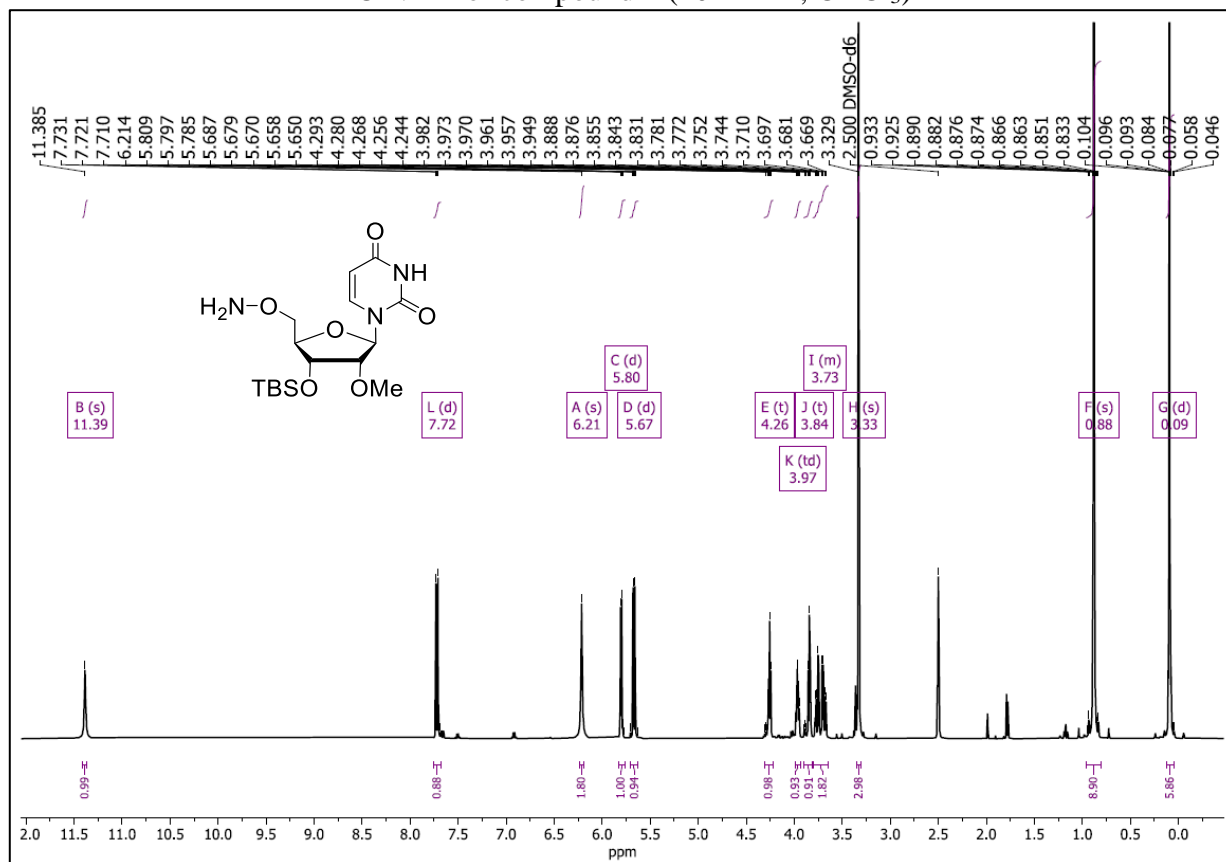

$^1\text{H}$  NMR of compound 3 (400 MHz, DMSO-*d*<sub>6</sub>)

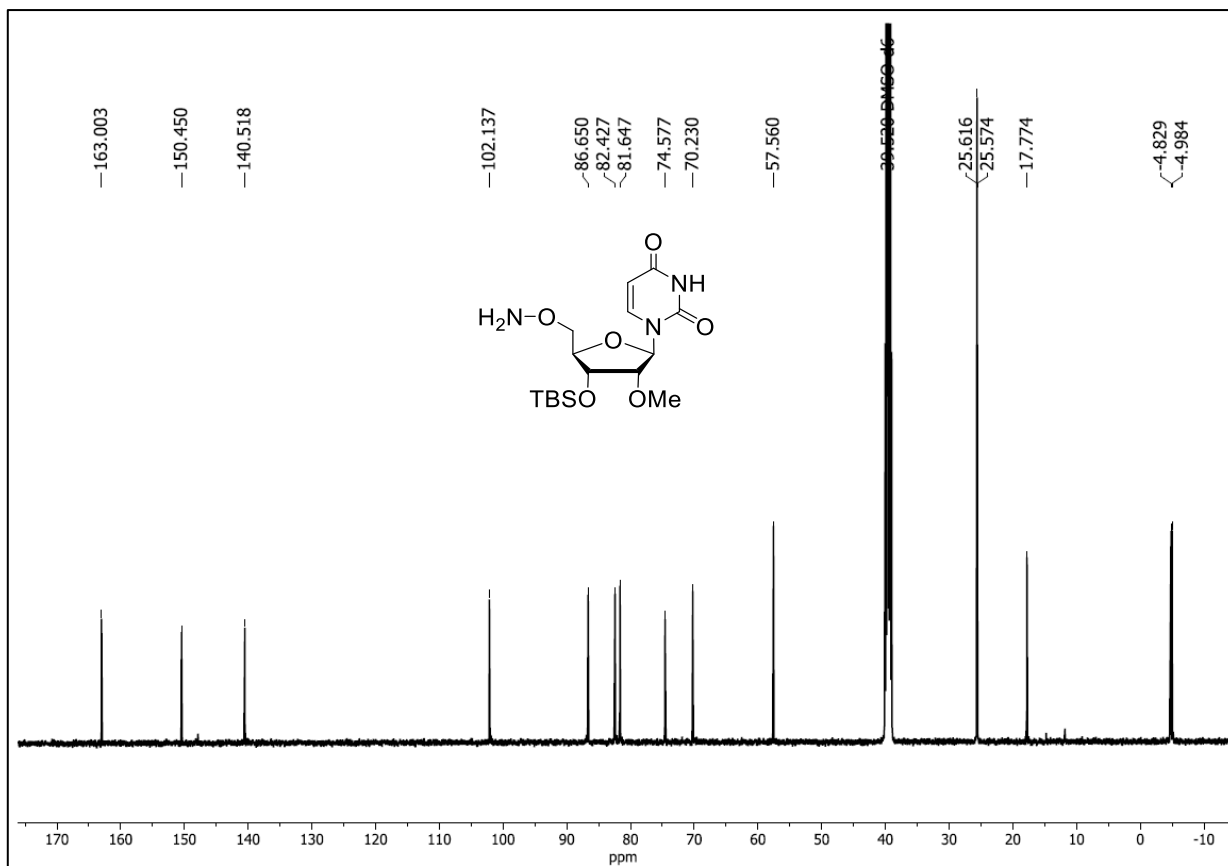

$^{13}\text{C}$  NMR of compound **3** (101 MHz, DMSO- $d_6$ )

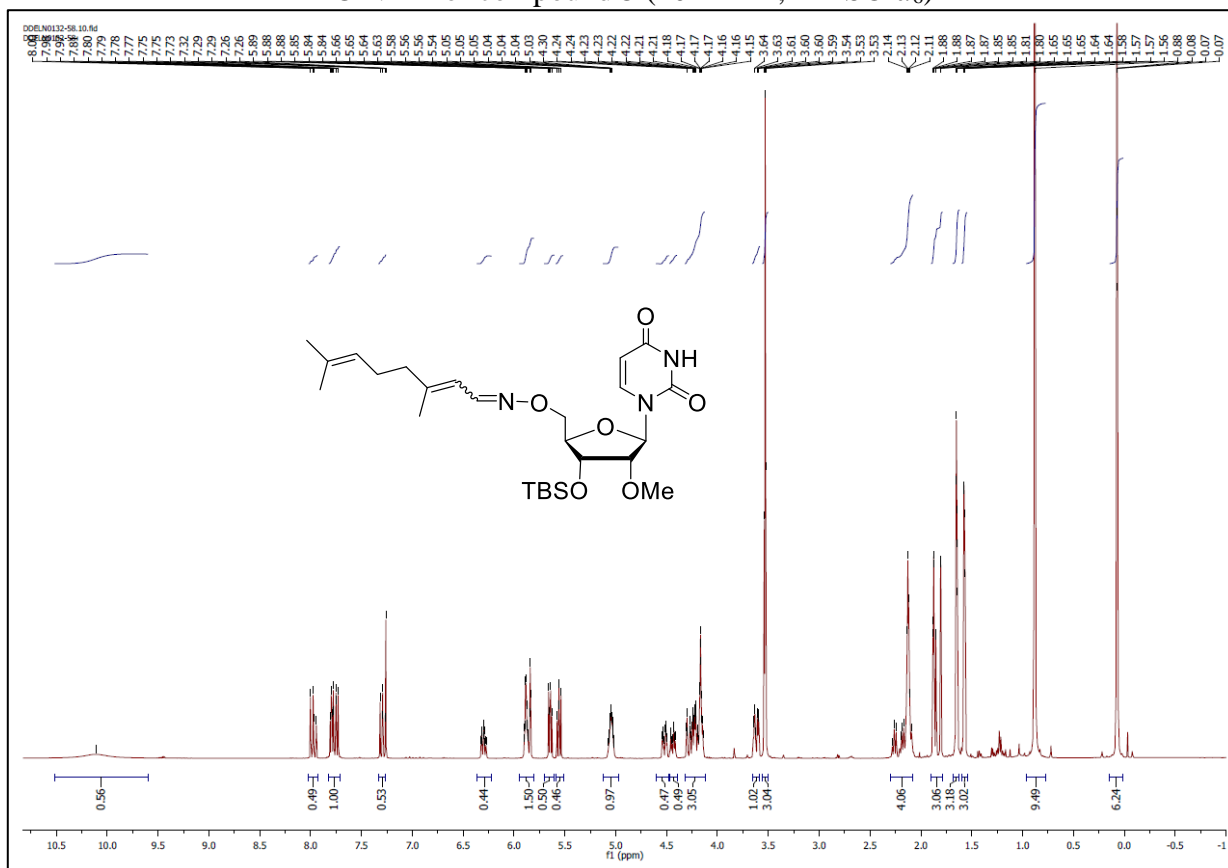

$^1\text{H}$  NMR of compound **4a** (400 MHz,  $\text{CDCl}_3$ )

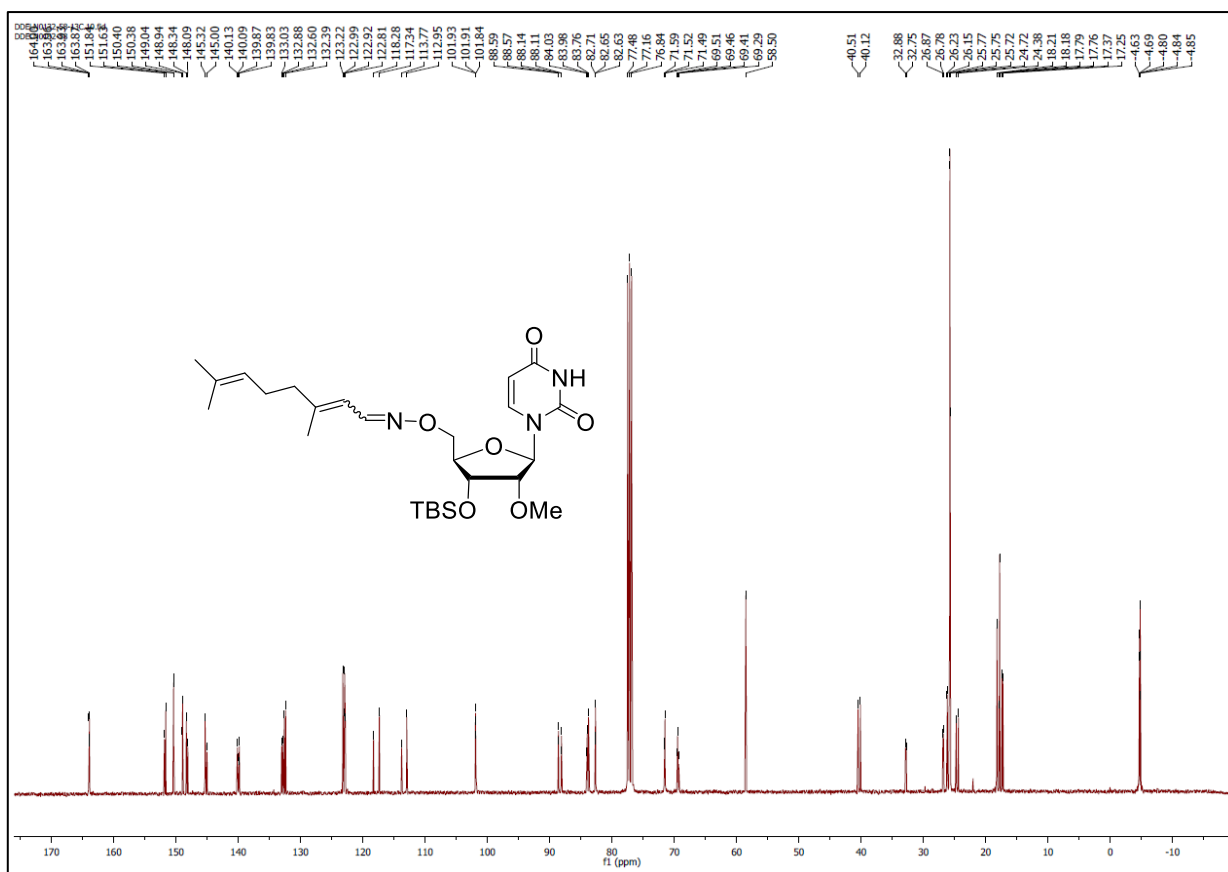

**<sup>13</sup>C NMR of compound 4a (101 MHz, CDCl<sub>3</sub>)**

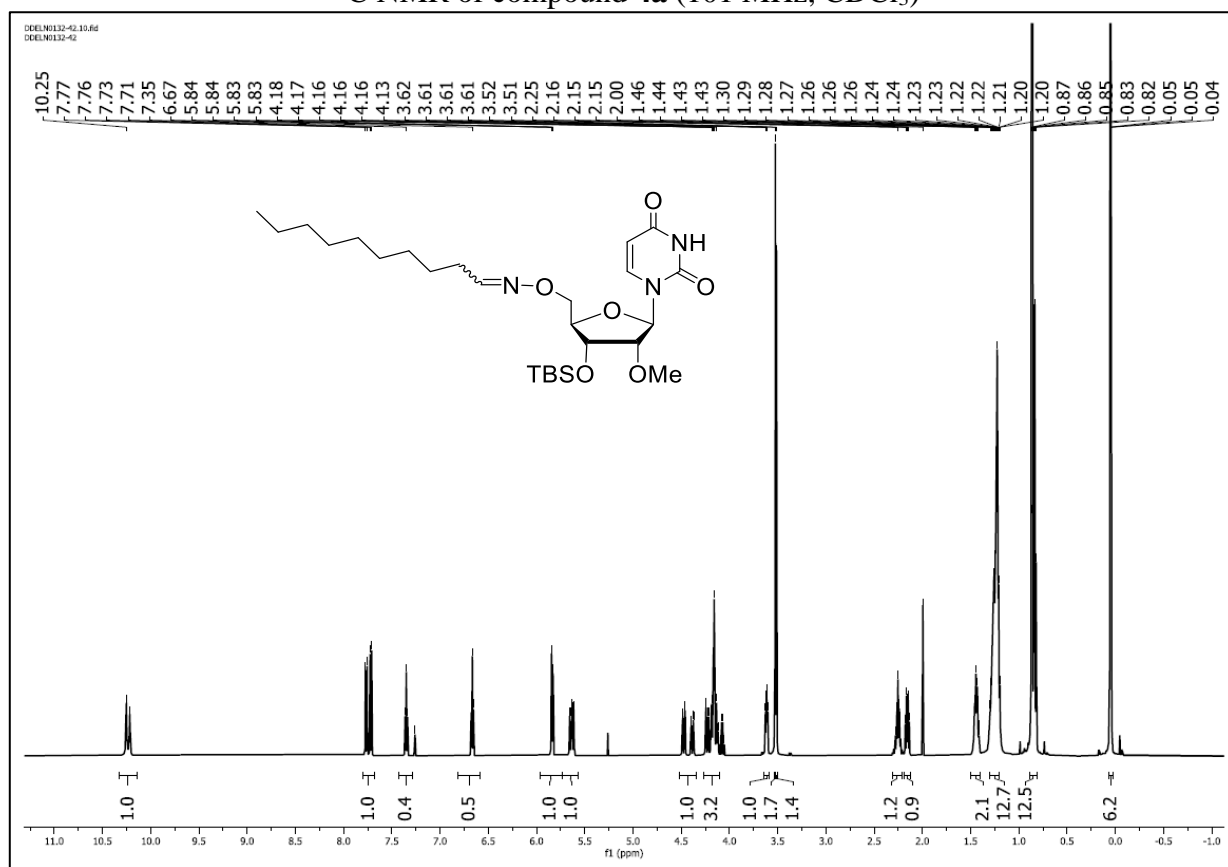

**<sup>1</sup>H NMR of compound 4b (500 MHz, CDCl<sub>3</sub>)**

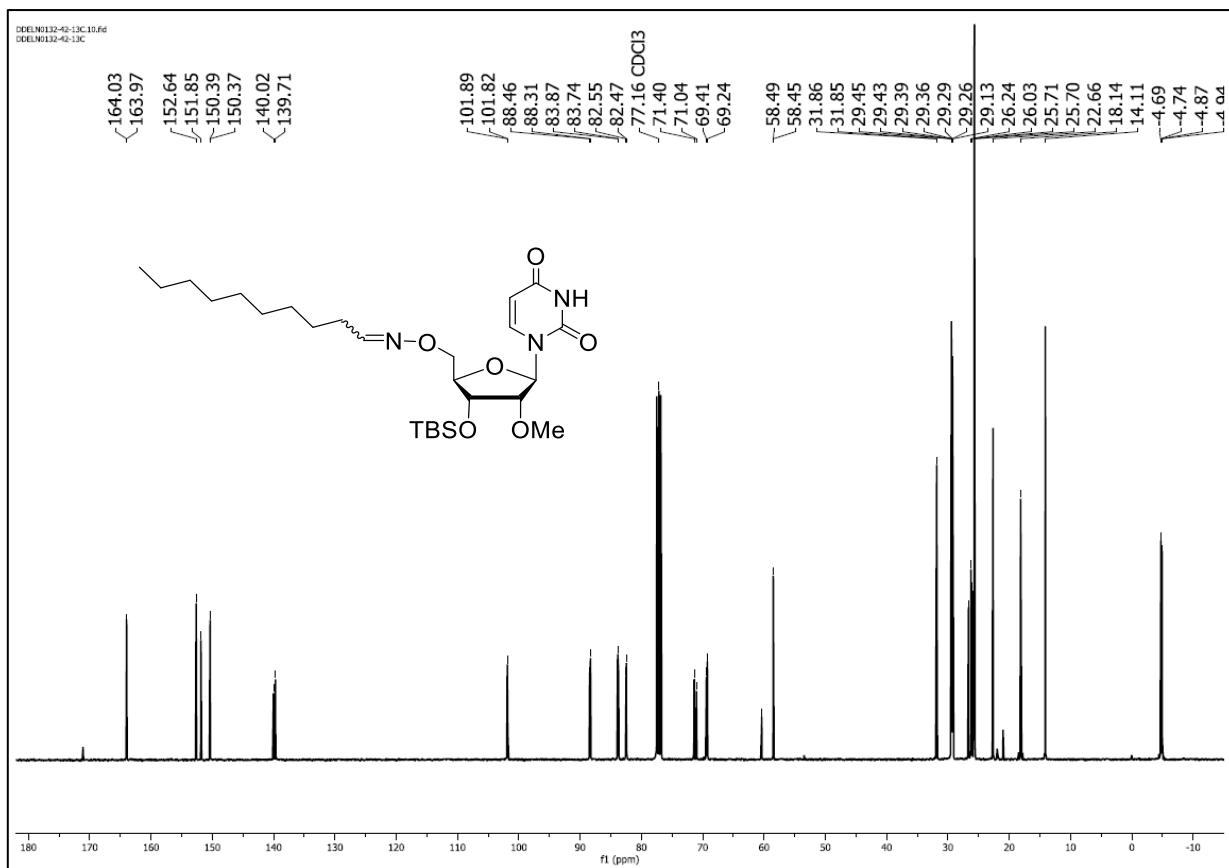

$^{13}\text{C}$  NMR of compound **4b** (101 MHz, CDCl<sub>3</sub>)

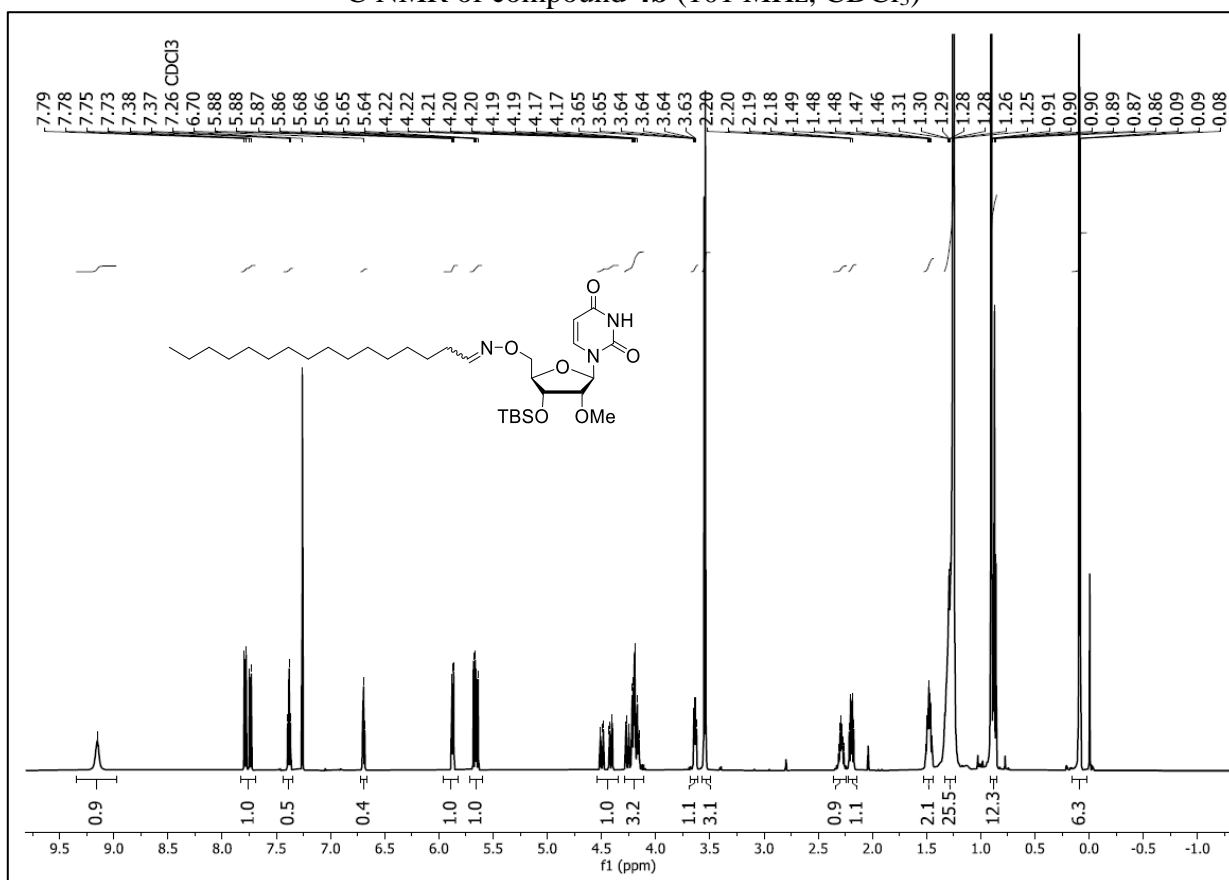

$^1\text{H}$  NMR of compound **4c** (500 MHz, CDCl<sub>3</sub>) ELN0132-52

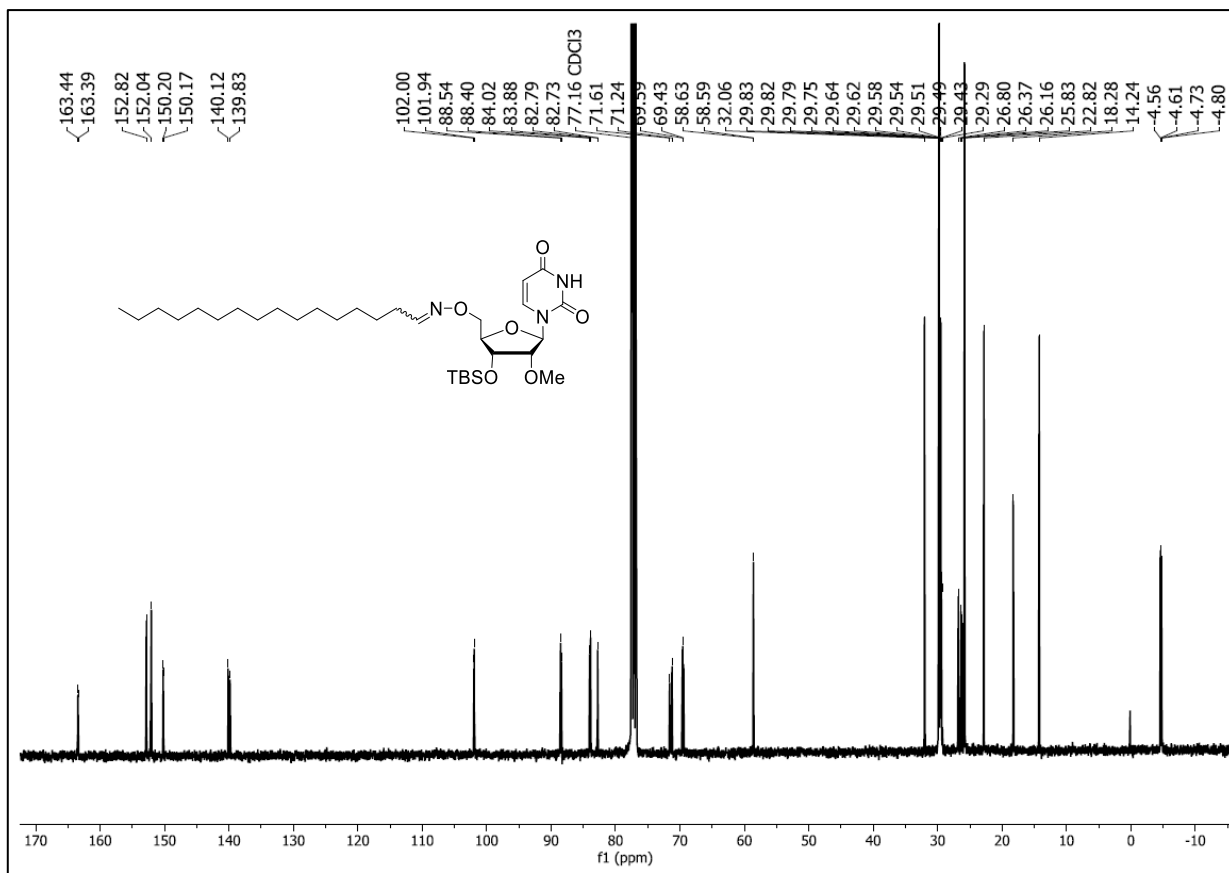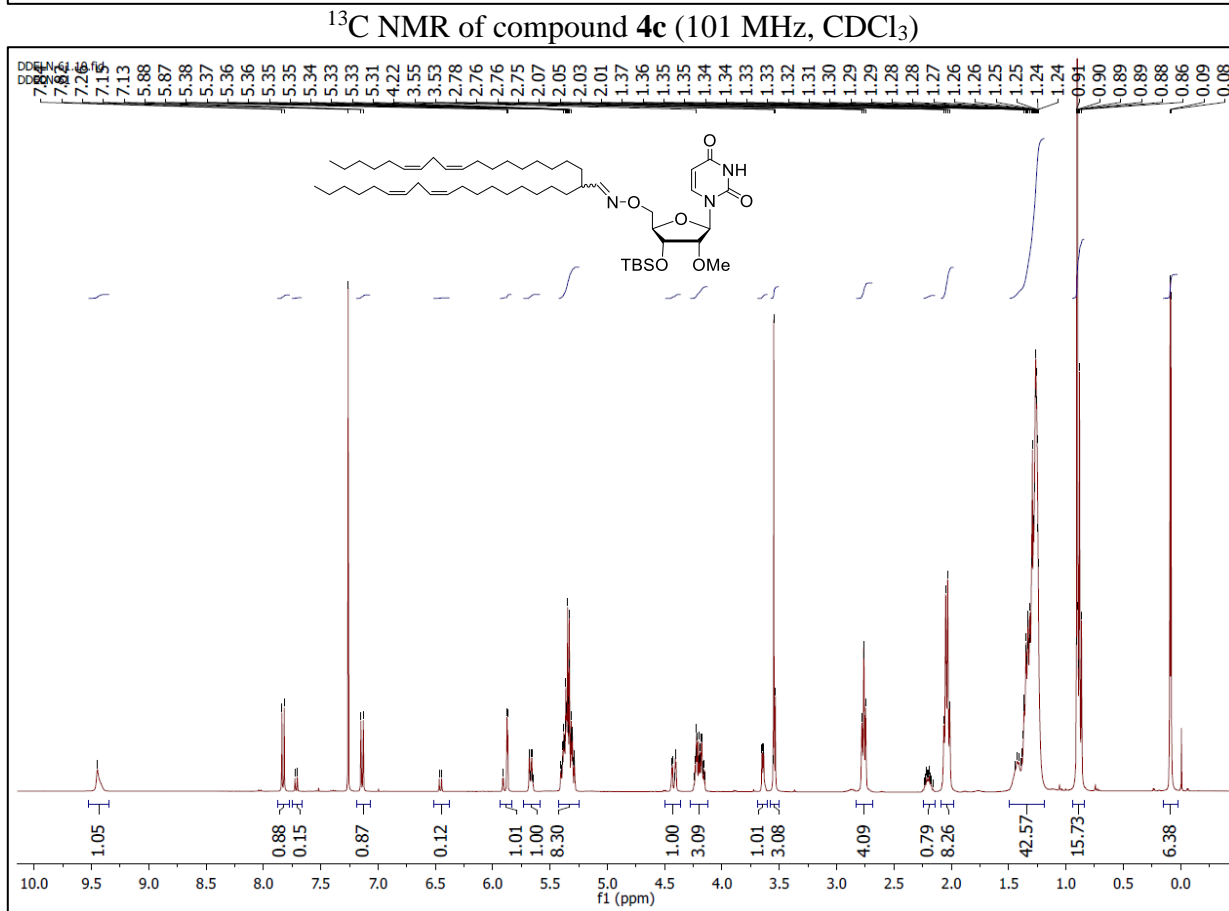



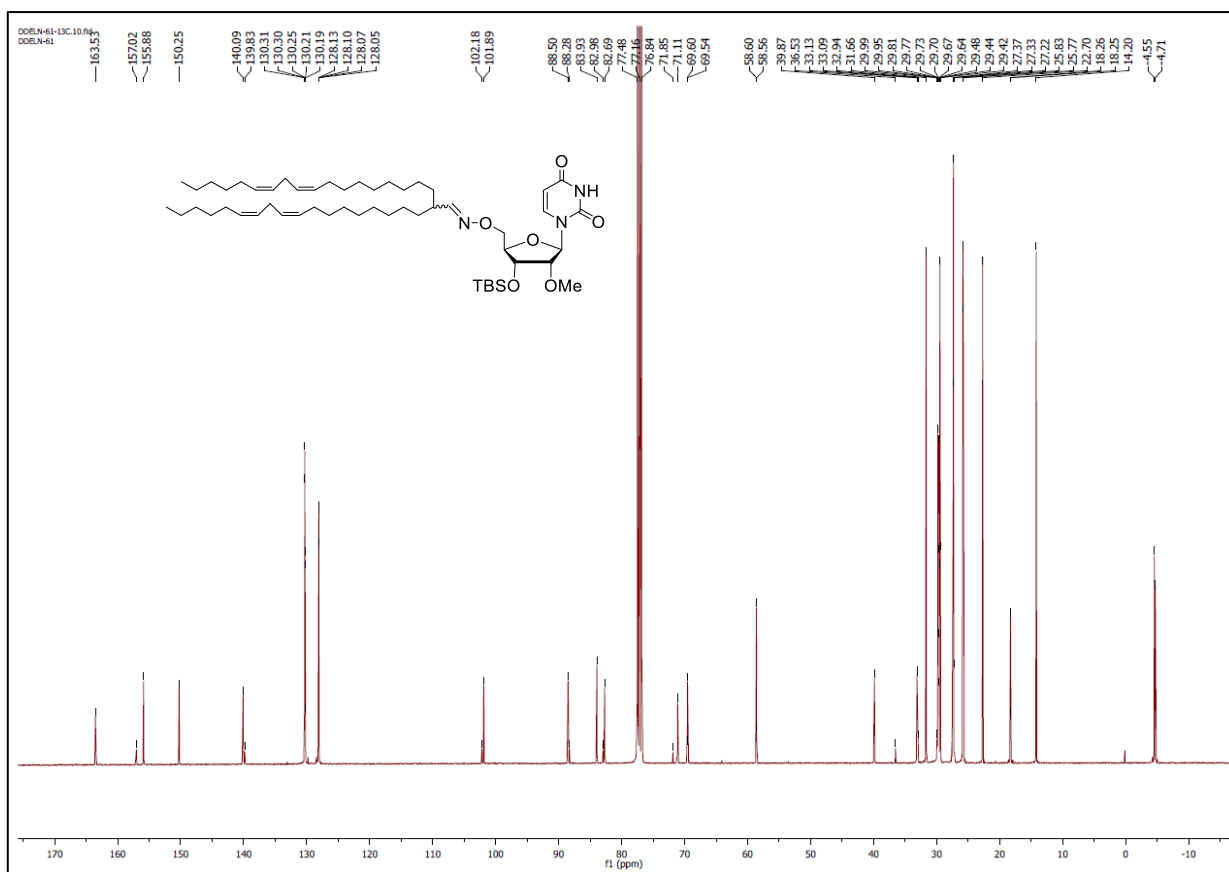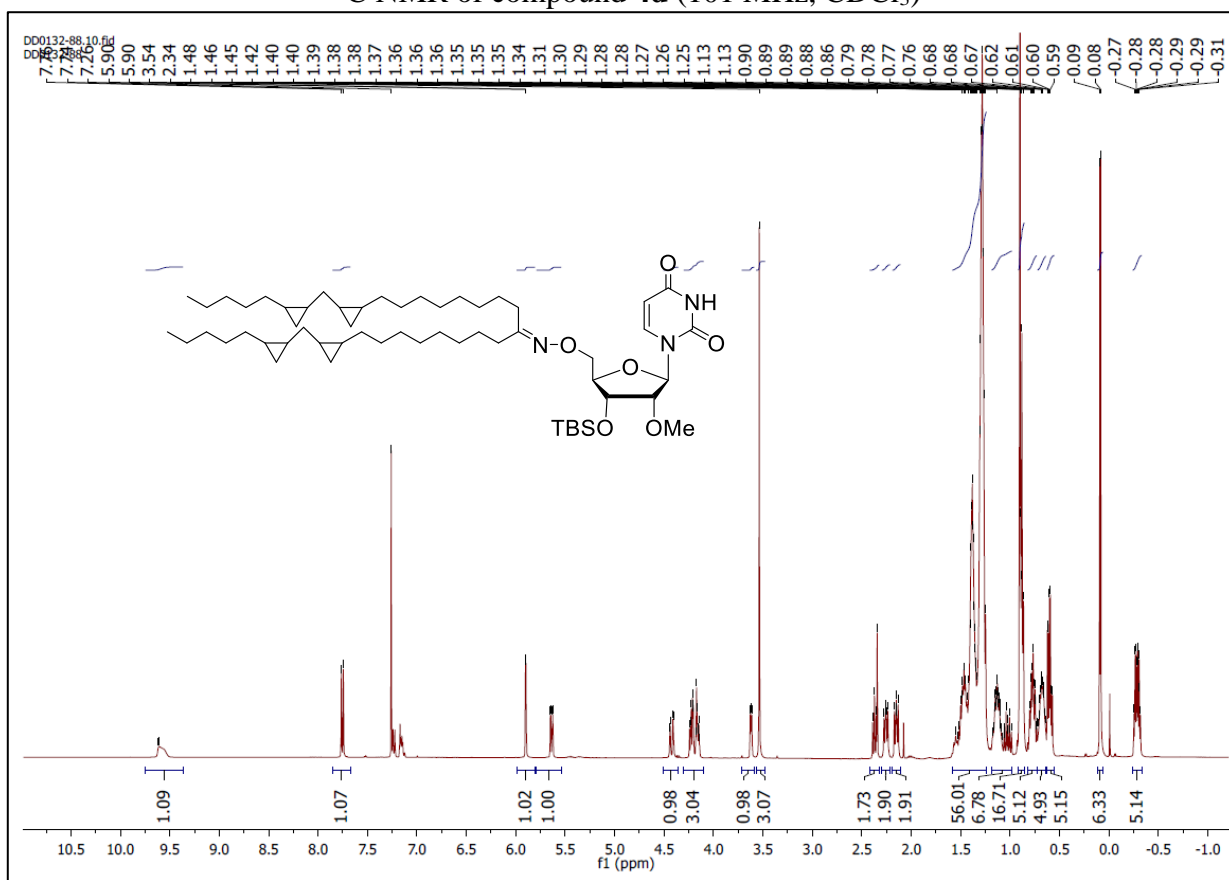

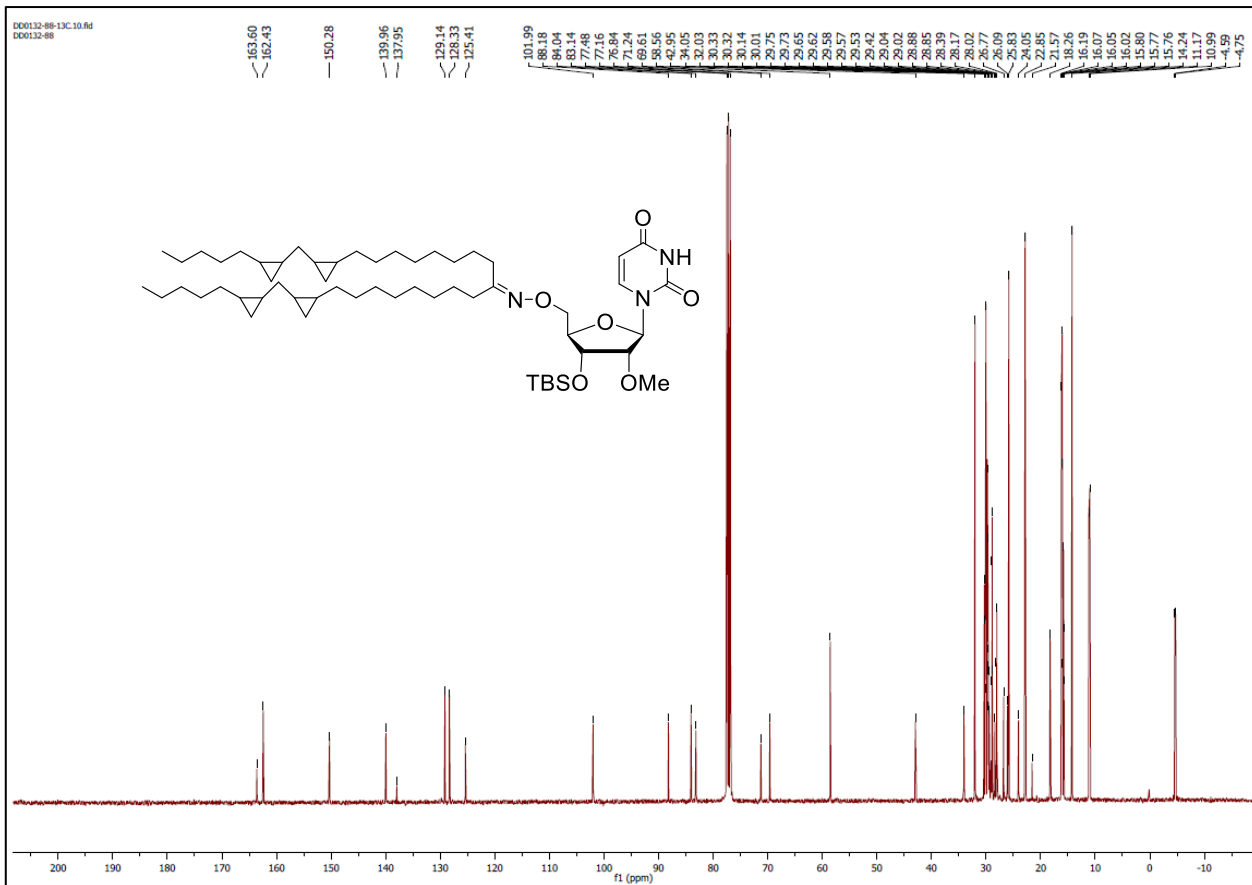

<sup>13</sup>C NMR of compound 4e (101 MHz, CDCl<sub>3</sub>)

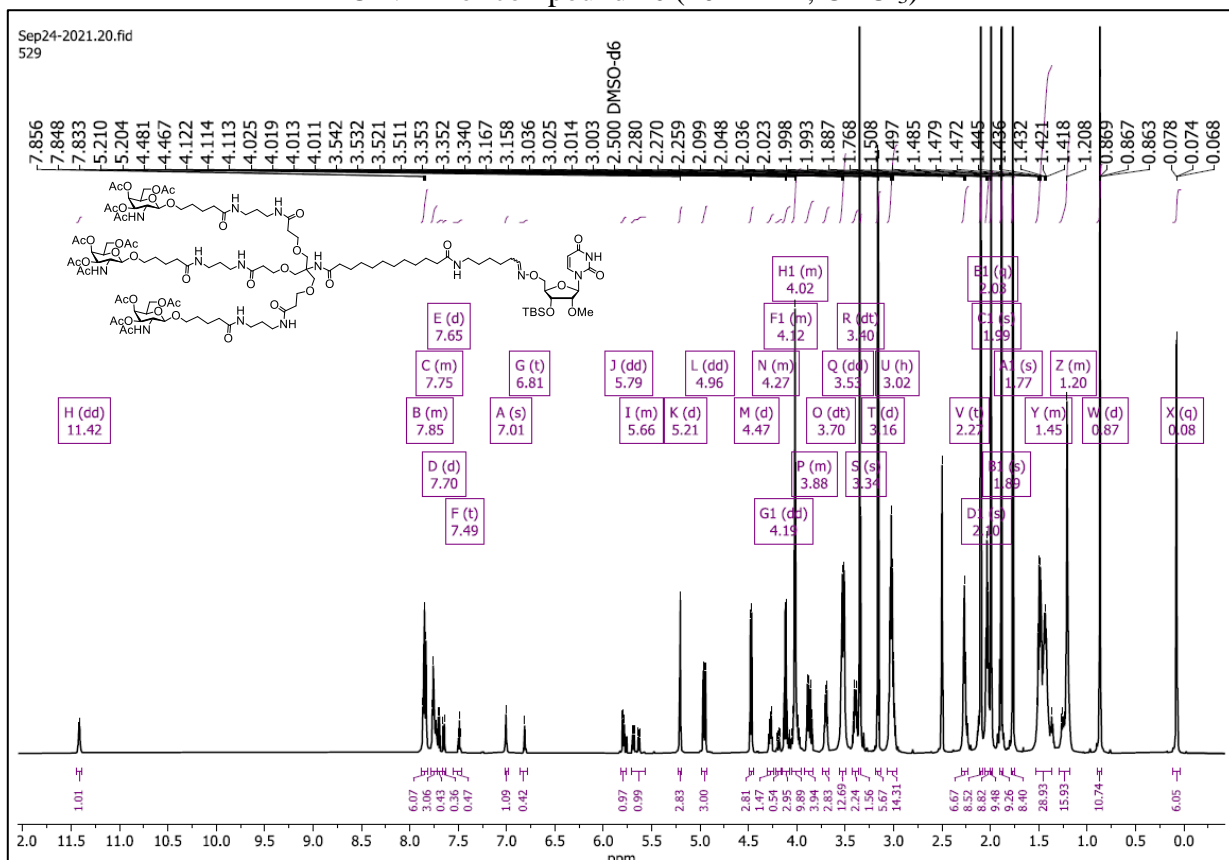

<sup>1</sup>H NMR of compound 4f (600 MHz, DMSO-d<sub>6</sub>)

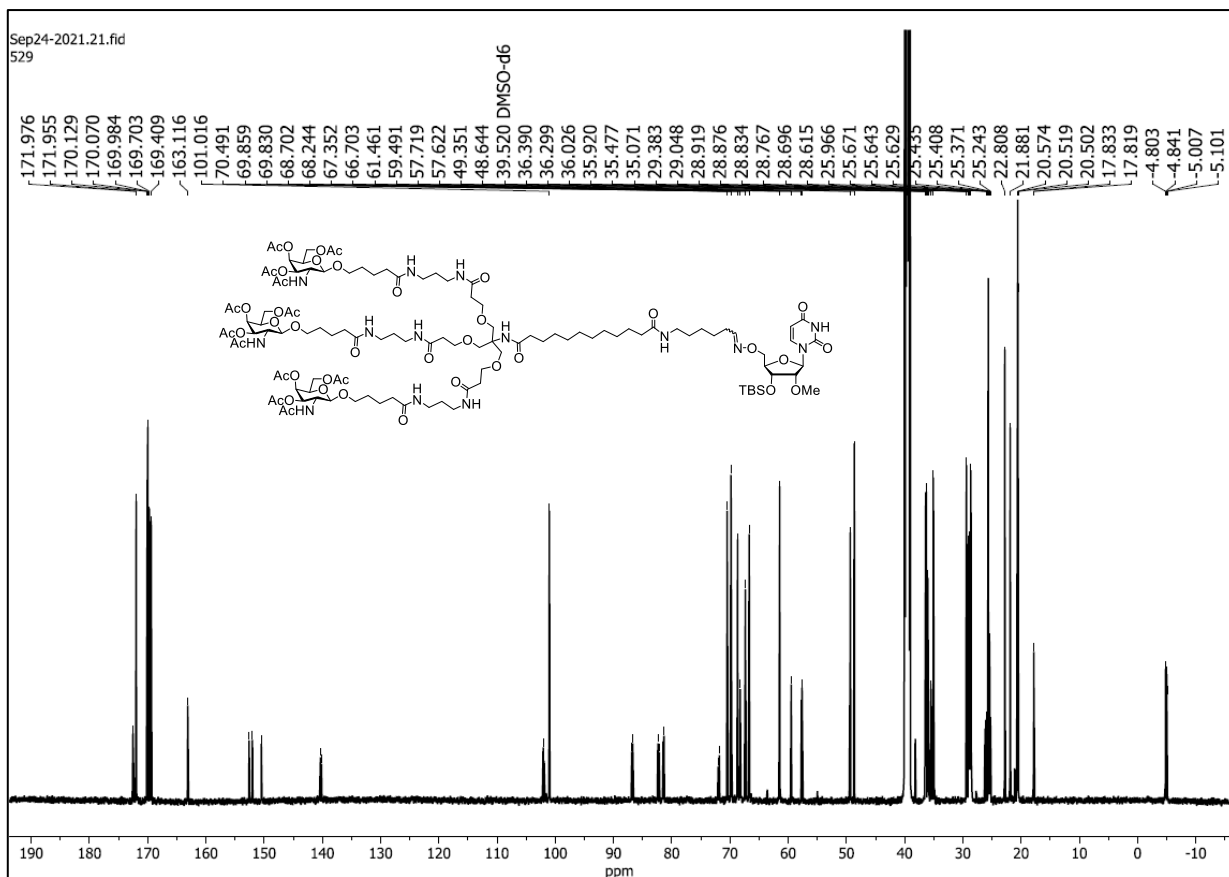

$^{13}\text{C}$  NMR of compound 4f (151 MHz, DMSO- $d_6$ )

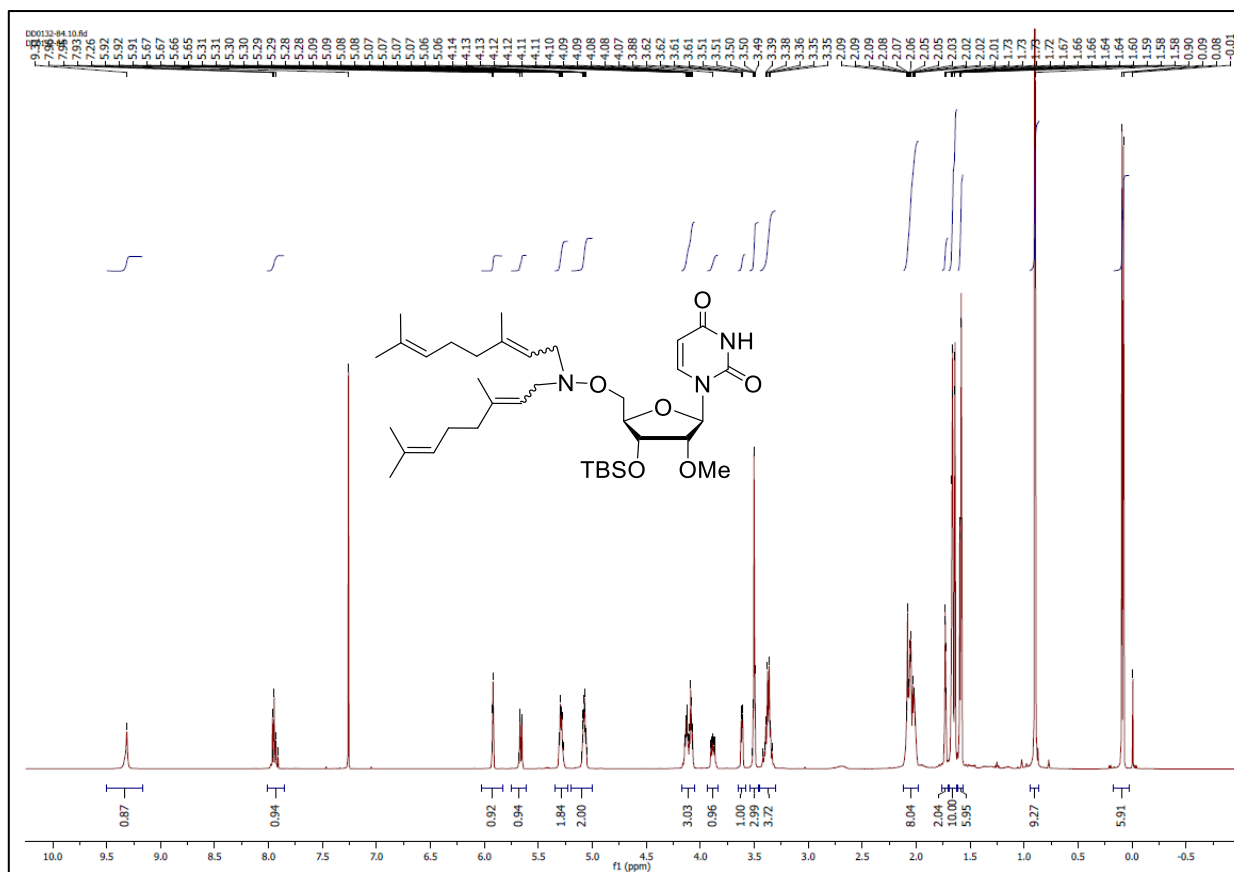

$^1\text{H}$  NMR of 5a (500 MHz,  $\text{CDCl}_3$ )

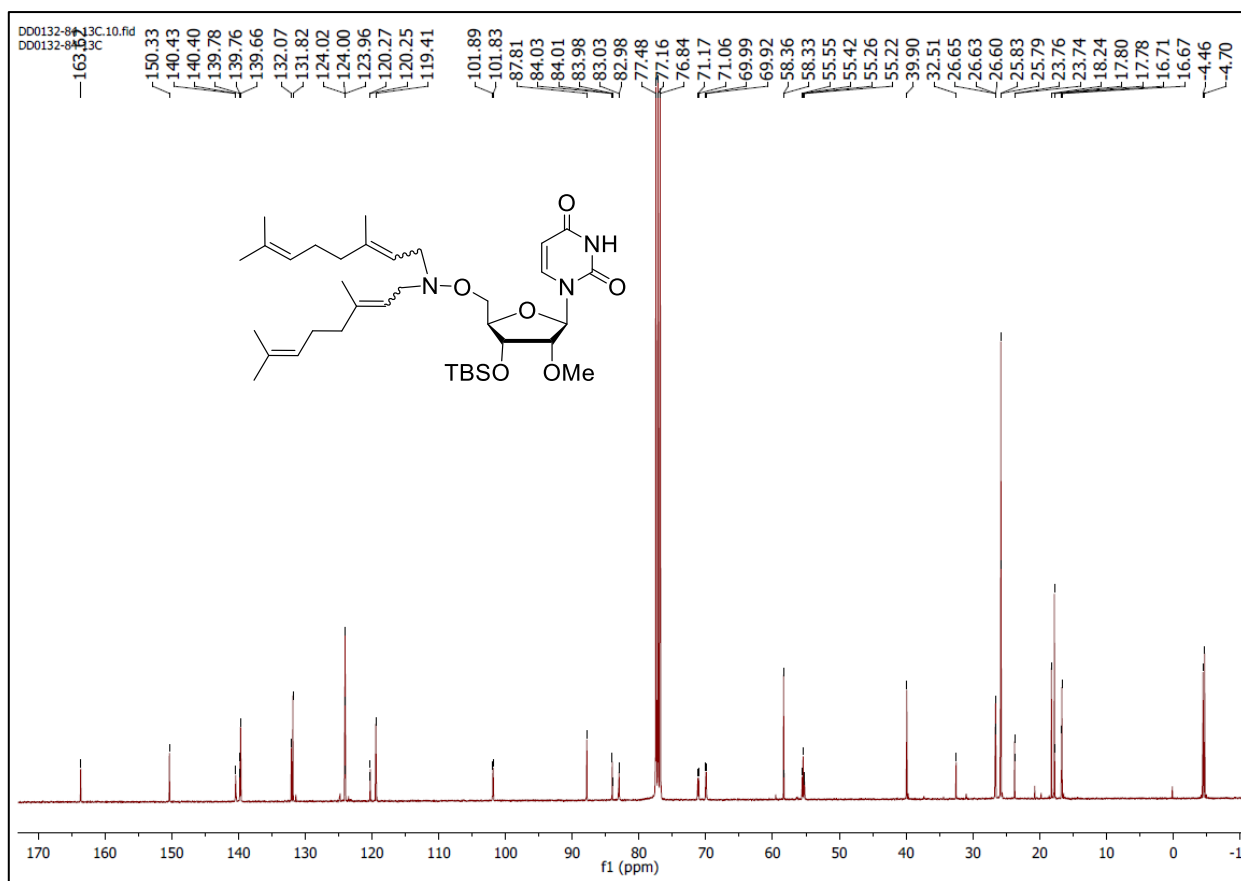

$^{13}\text{C}$  NMR of compound **5a** (101 MHz,  $\text{CDCl}_3$ )

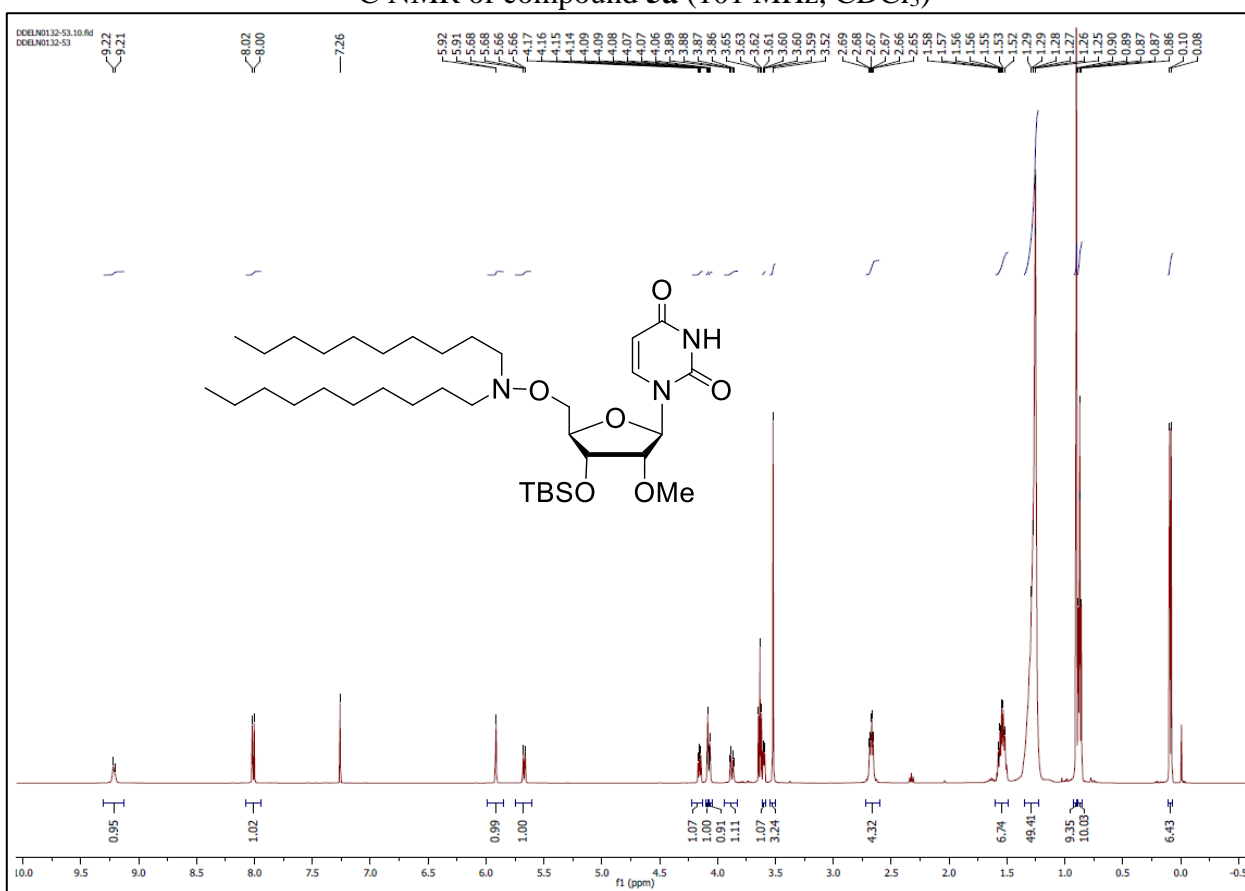

$^1\text{H}$  NMR of compound **5b** (500 MHz,  $\text{CDCl}_3$ )

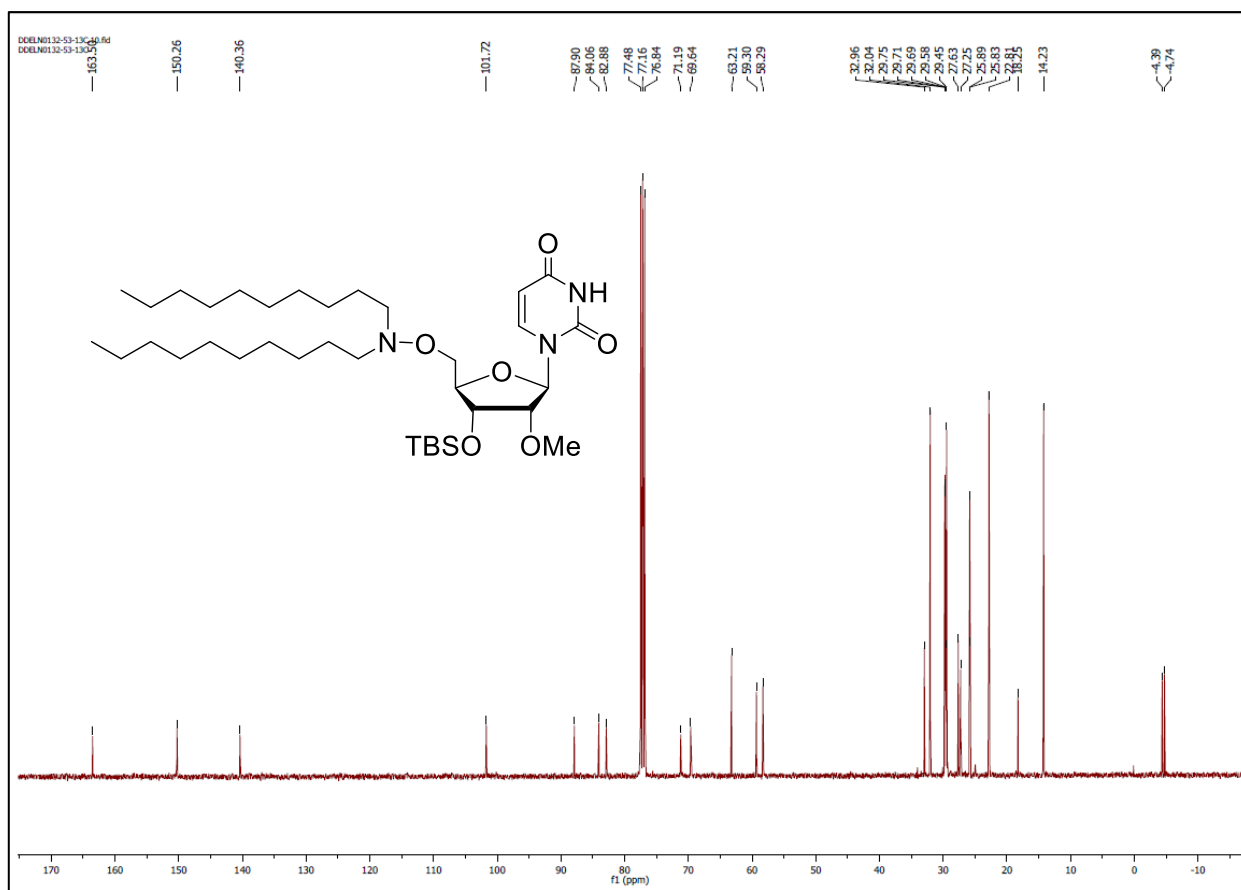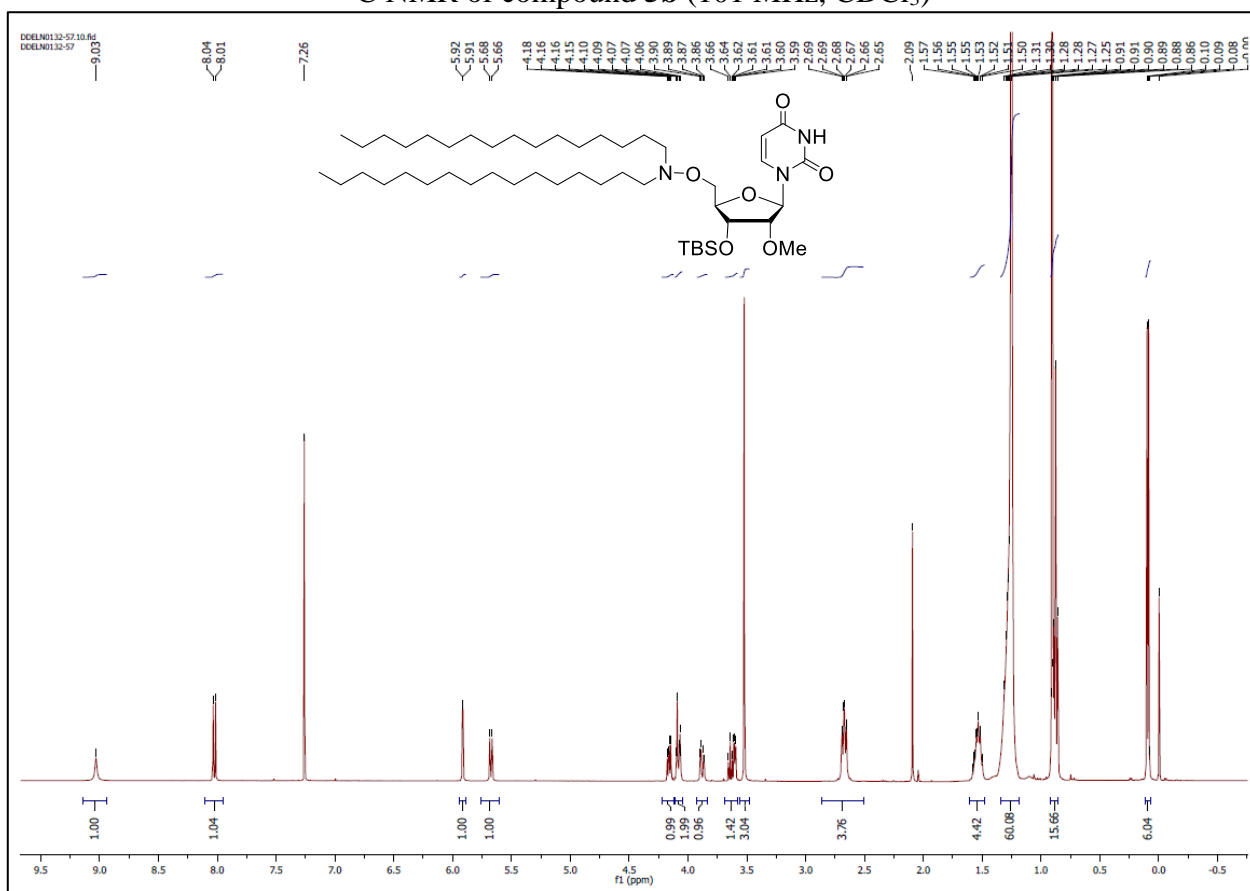

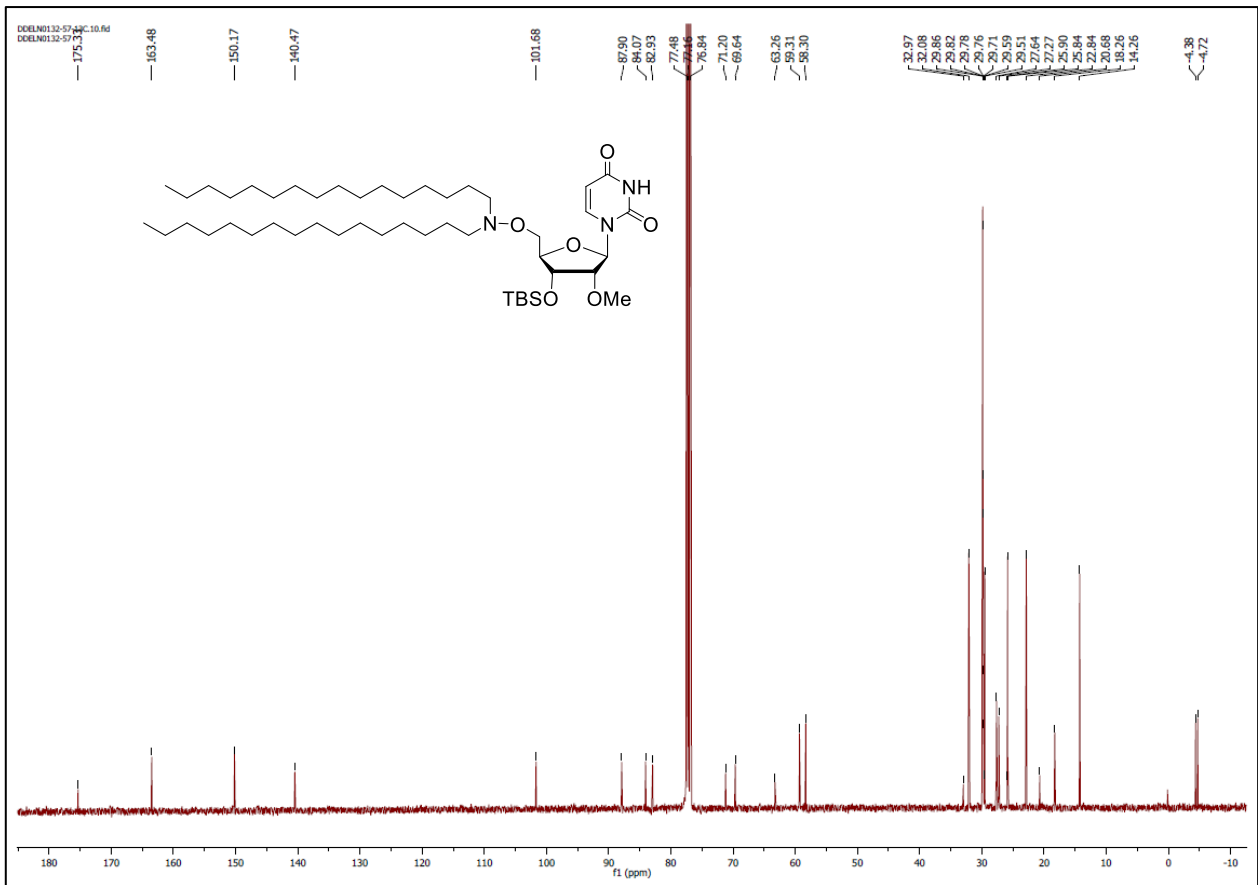

<sup>13</sup>C NMR of compound **5c** (101 MHz, CDCl<sub>3</sub>)

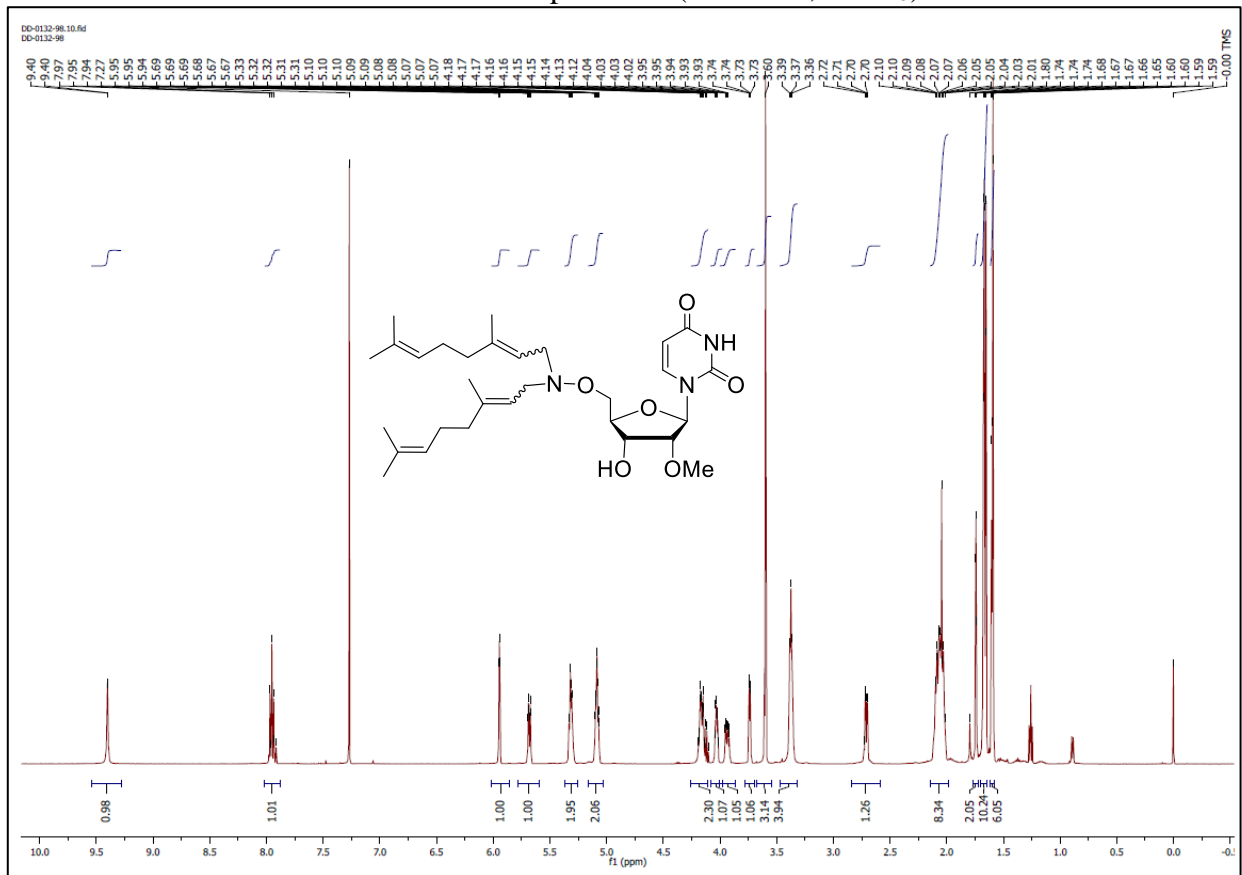

<sup>1</sup>H NMR of compound **6a** (500 MHz, CDCl<sub>3</sub>)

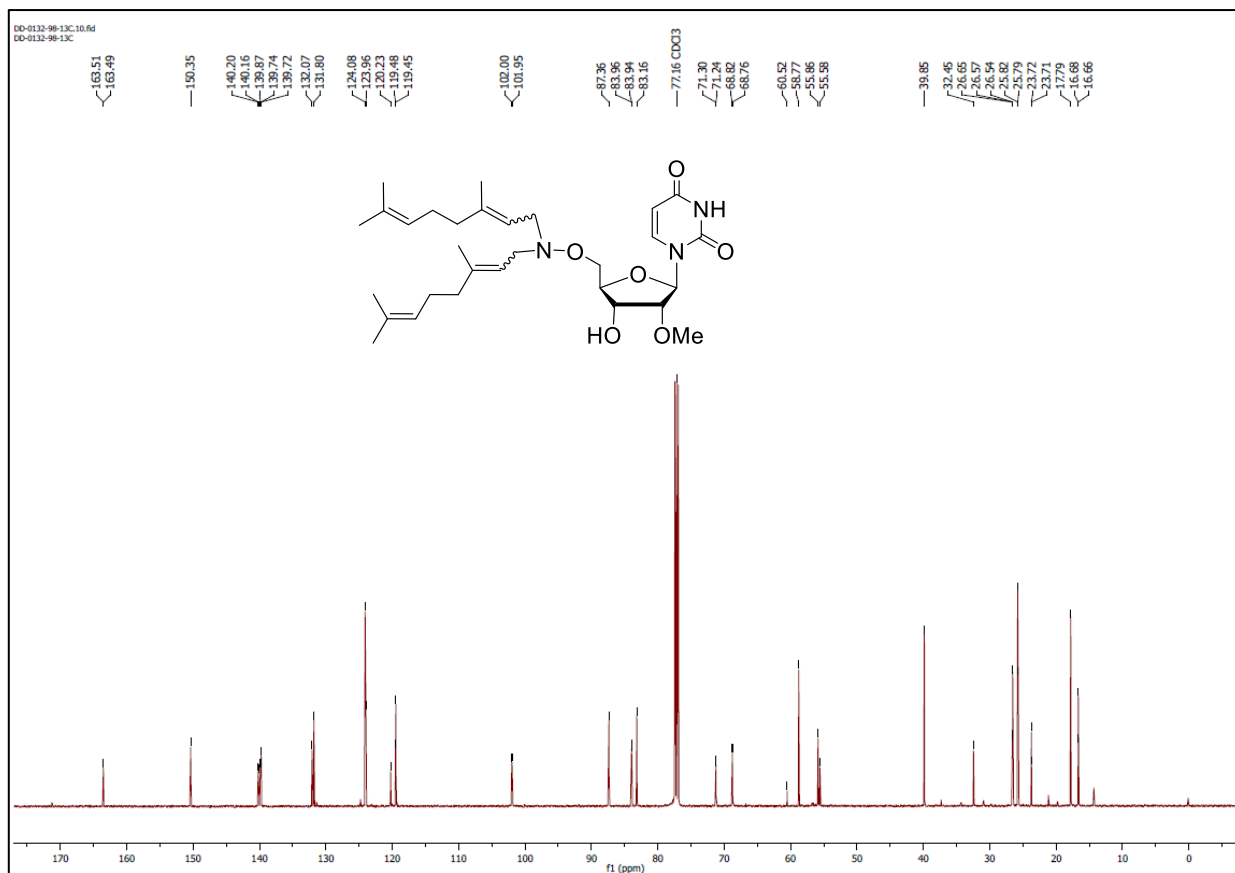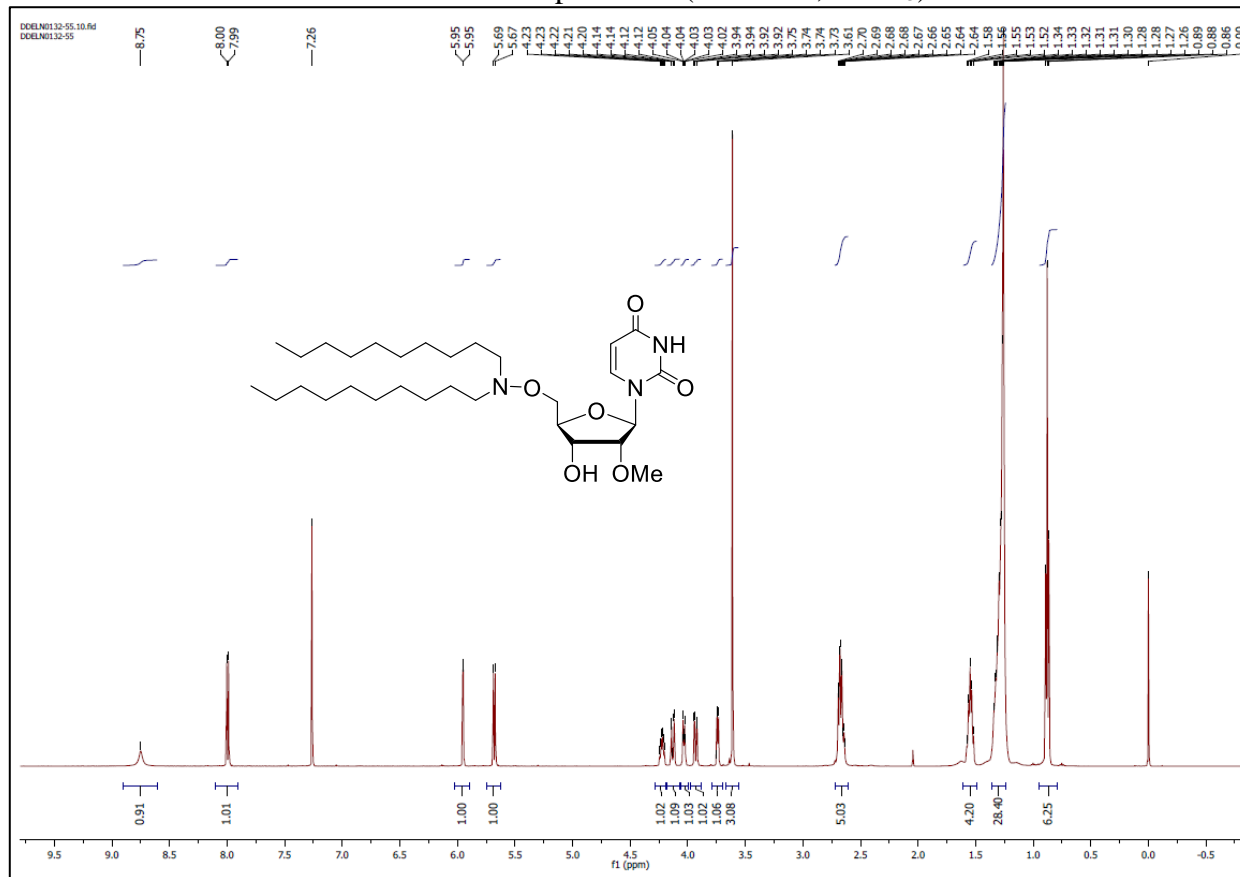

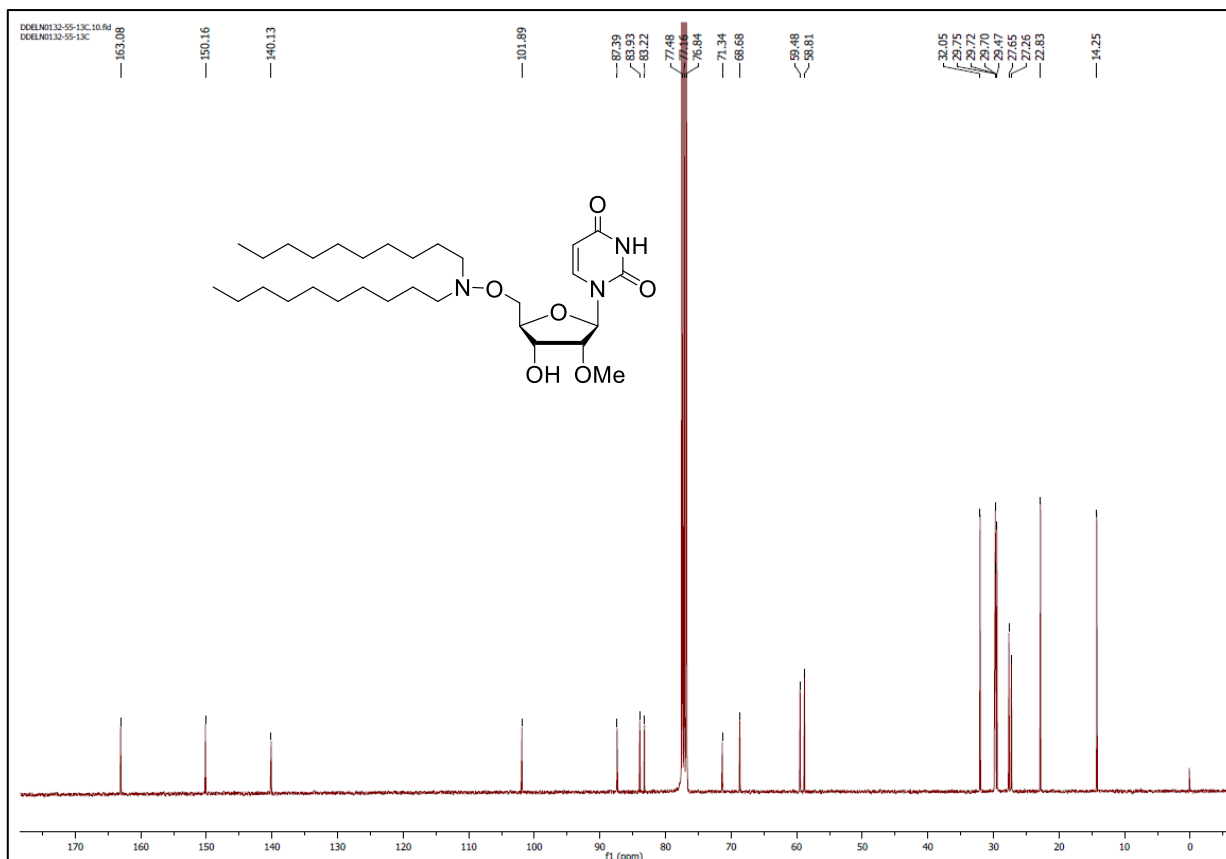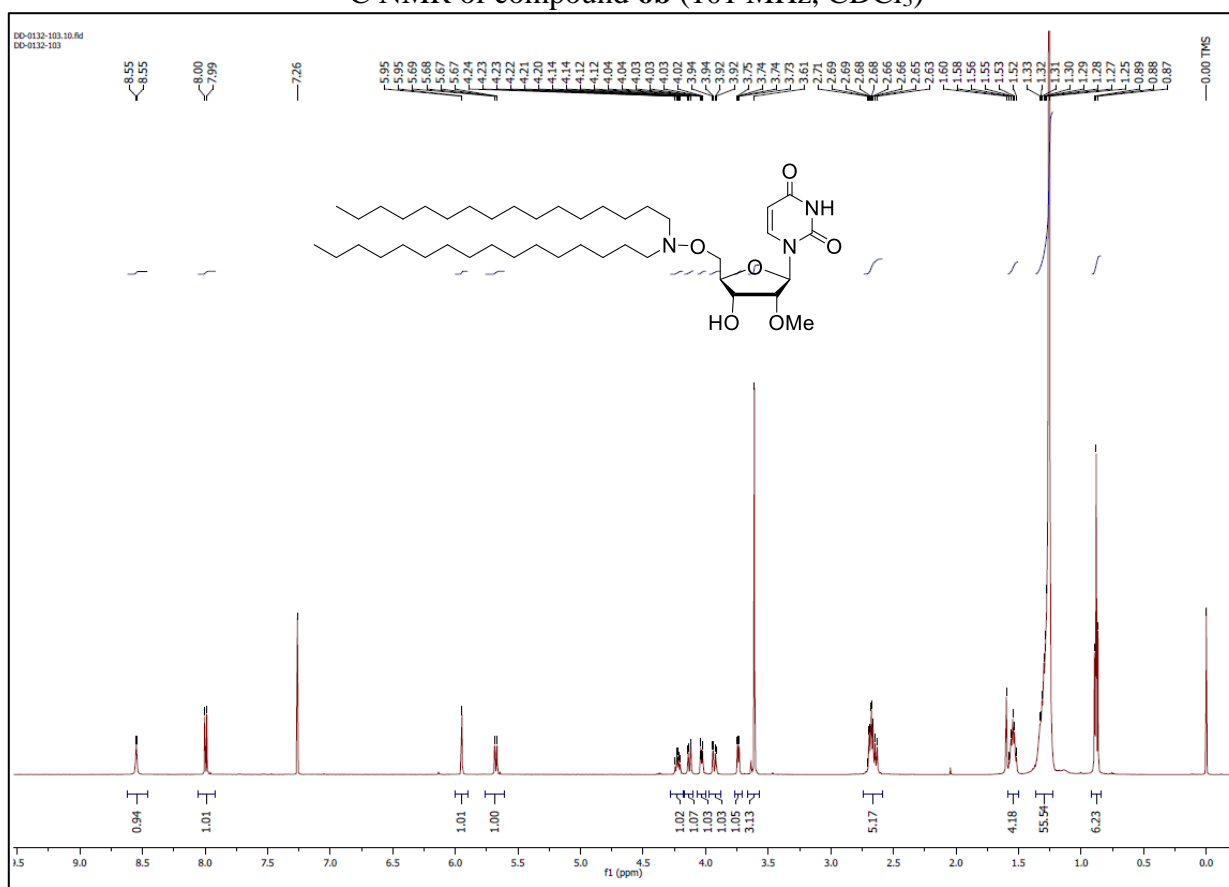



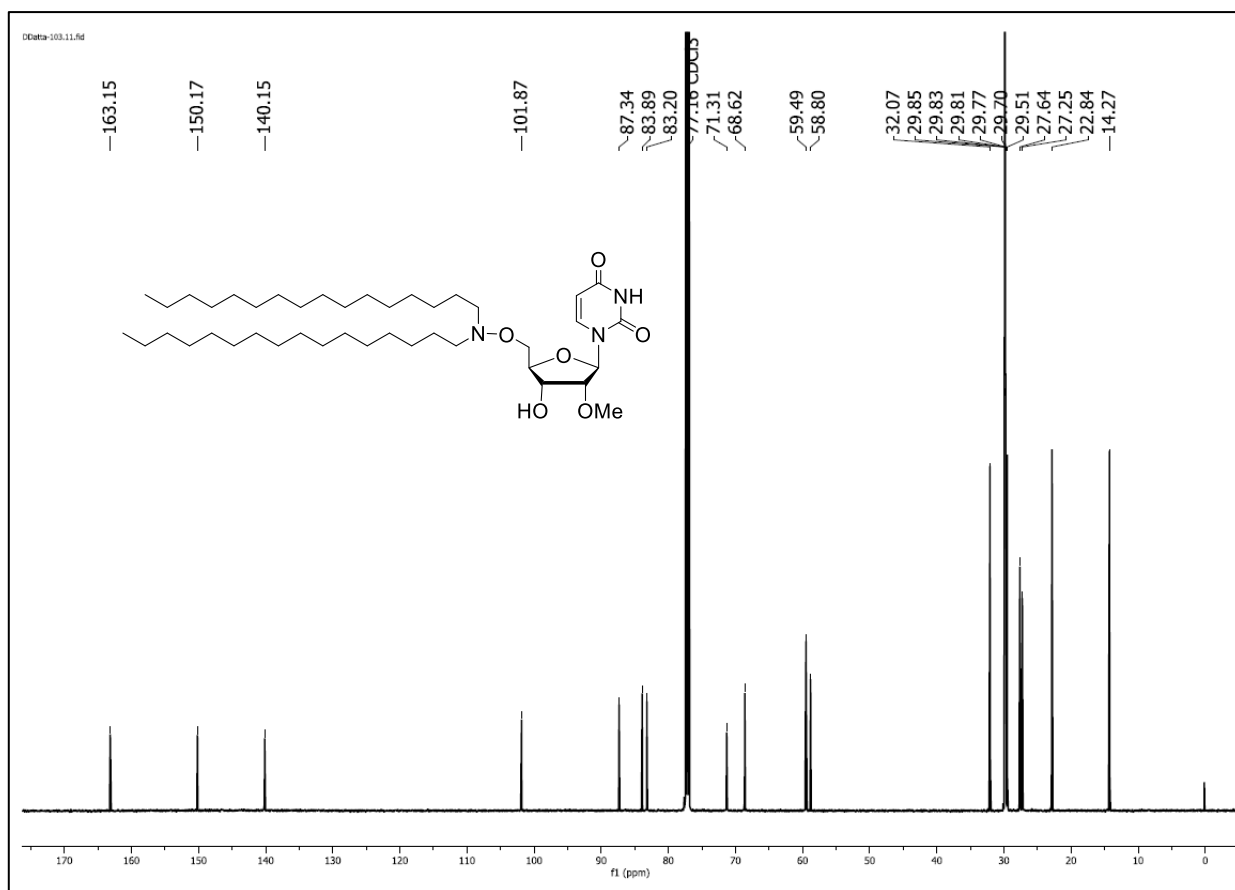

$^{13}\text{C}$  NMR of compound **6c** (151 MHz, CDCl<sub>3</sub>)

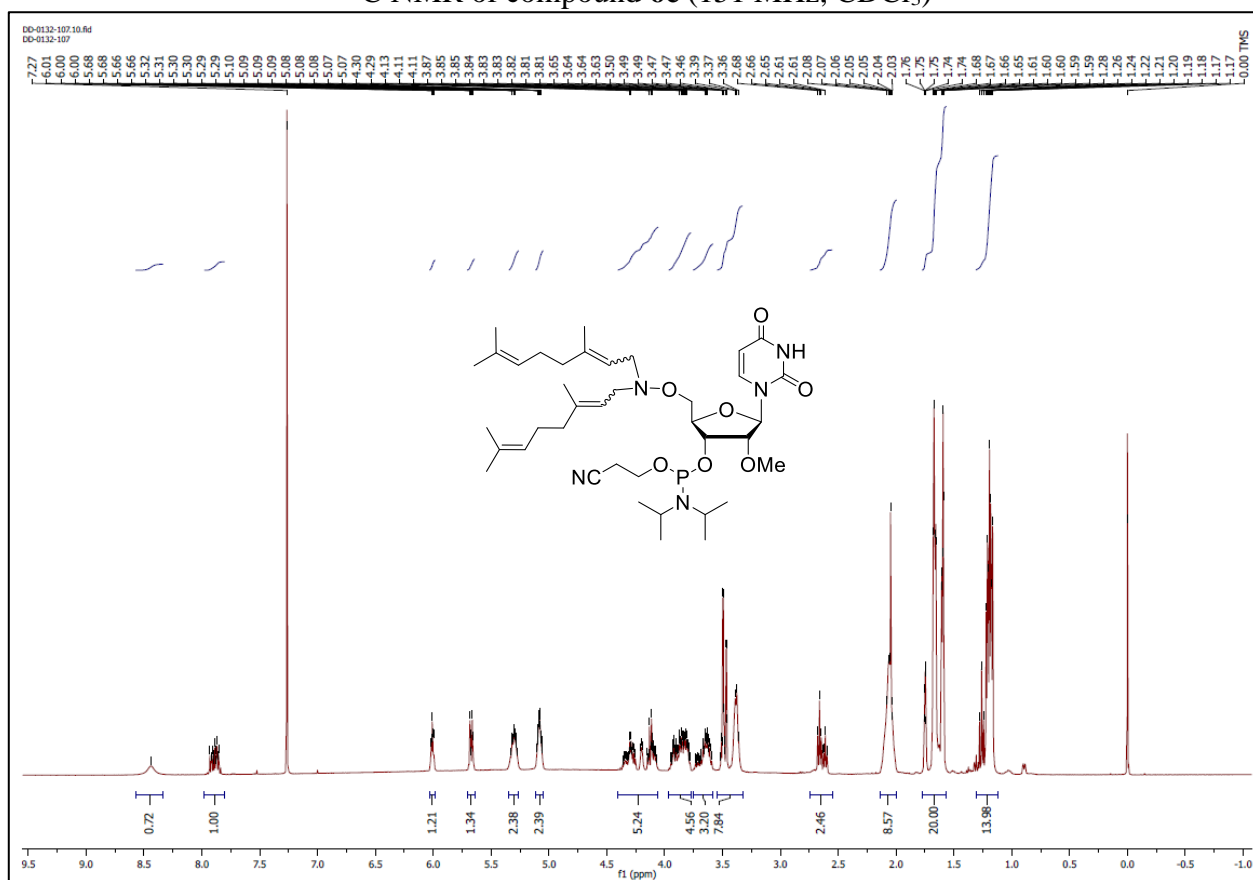

$^1\text{H}$  NMR of compound **7a** (400 MHz, CDCl<sub>3</sub>)

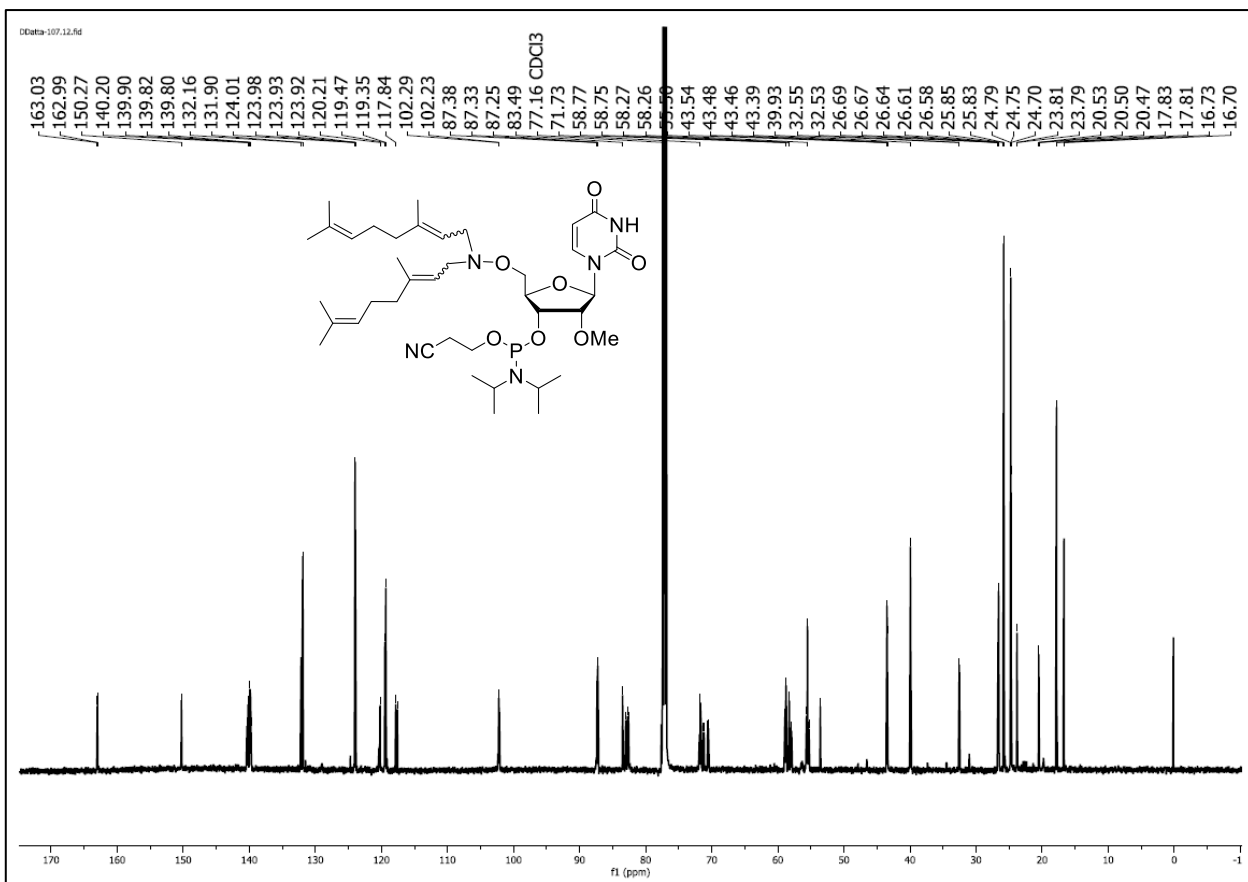

$^{13}\text{C}$  NMR of compound **7a** (151 MHz, CDCl<sub>3</sub>)

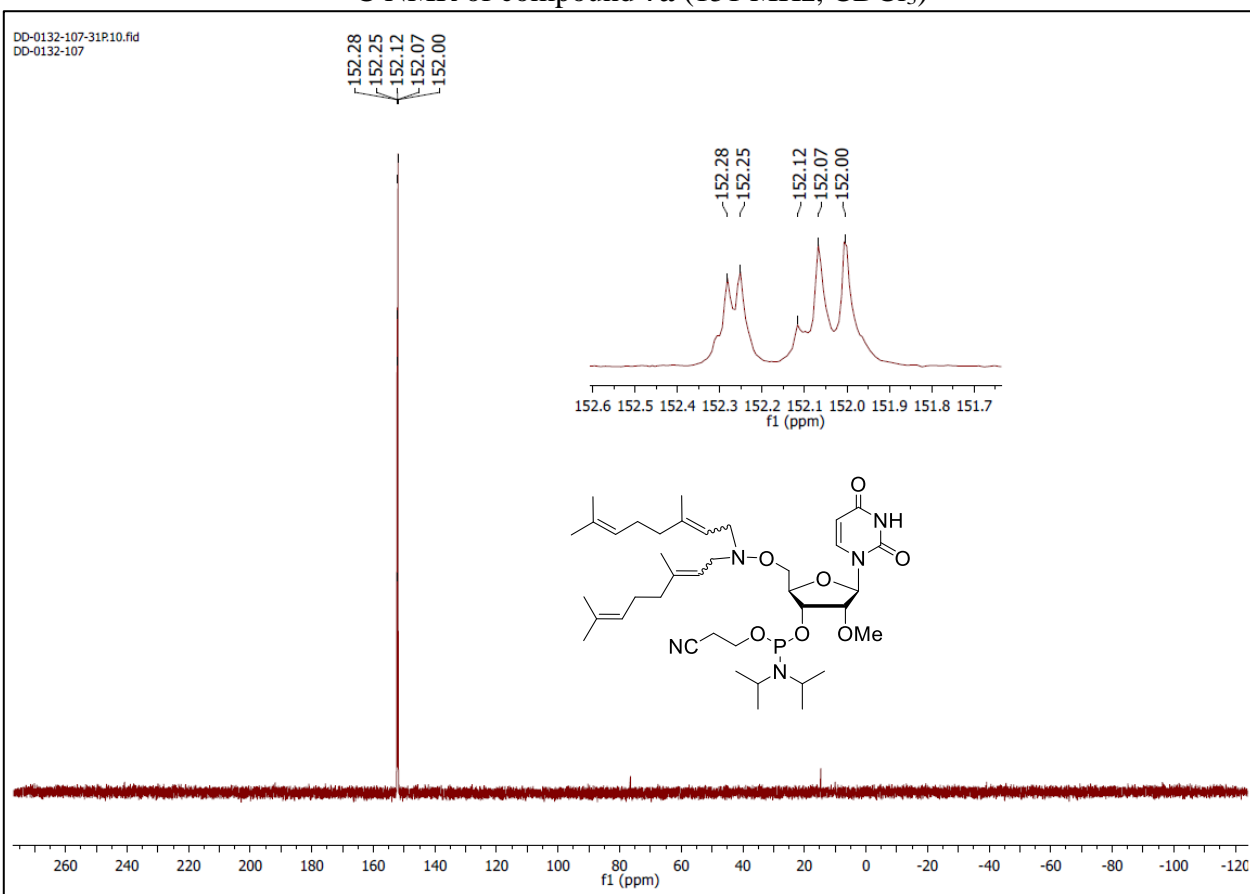

$^{31}\text{P}$  NMR of compound **7a** (162 MHz, CDCl<sub>3</sub>)

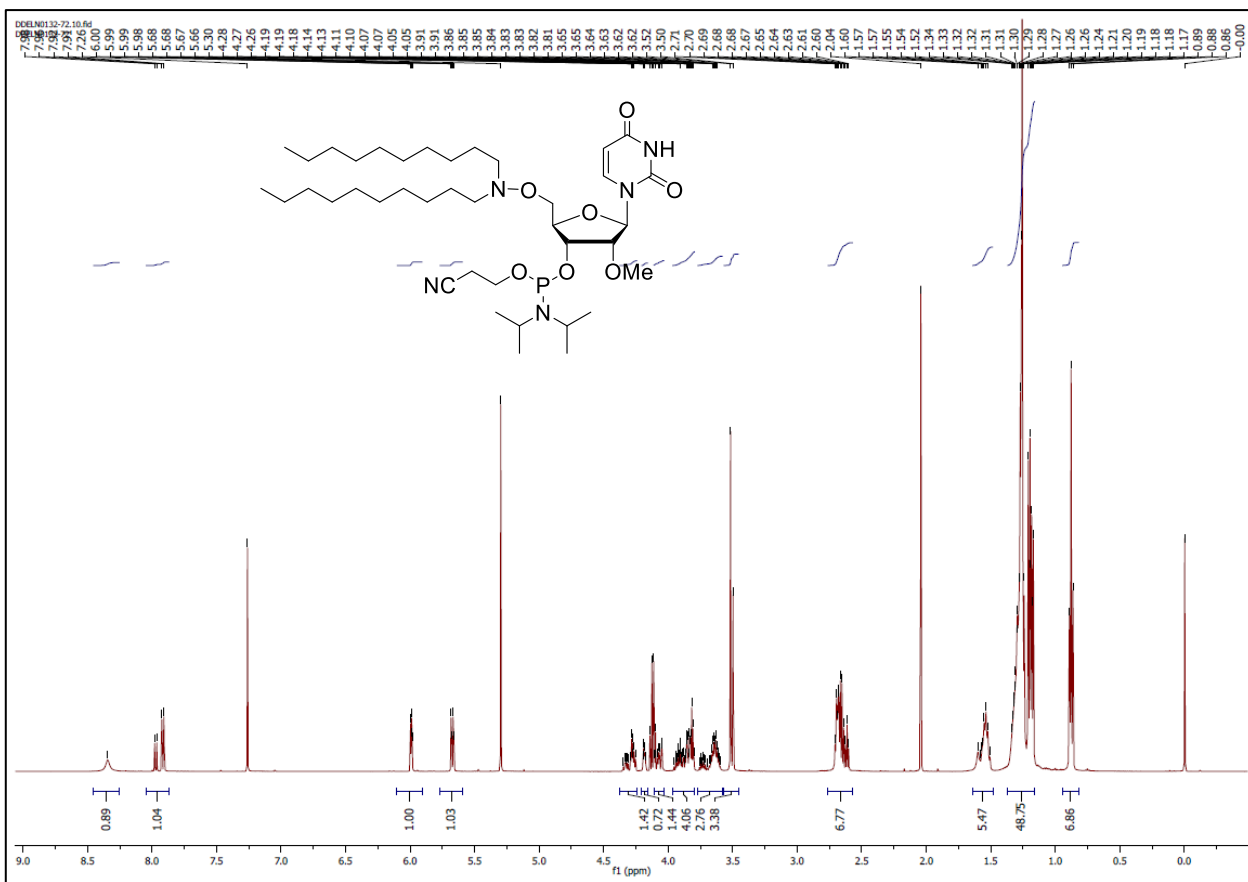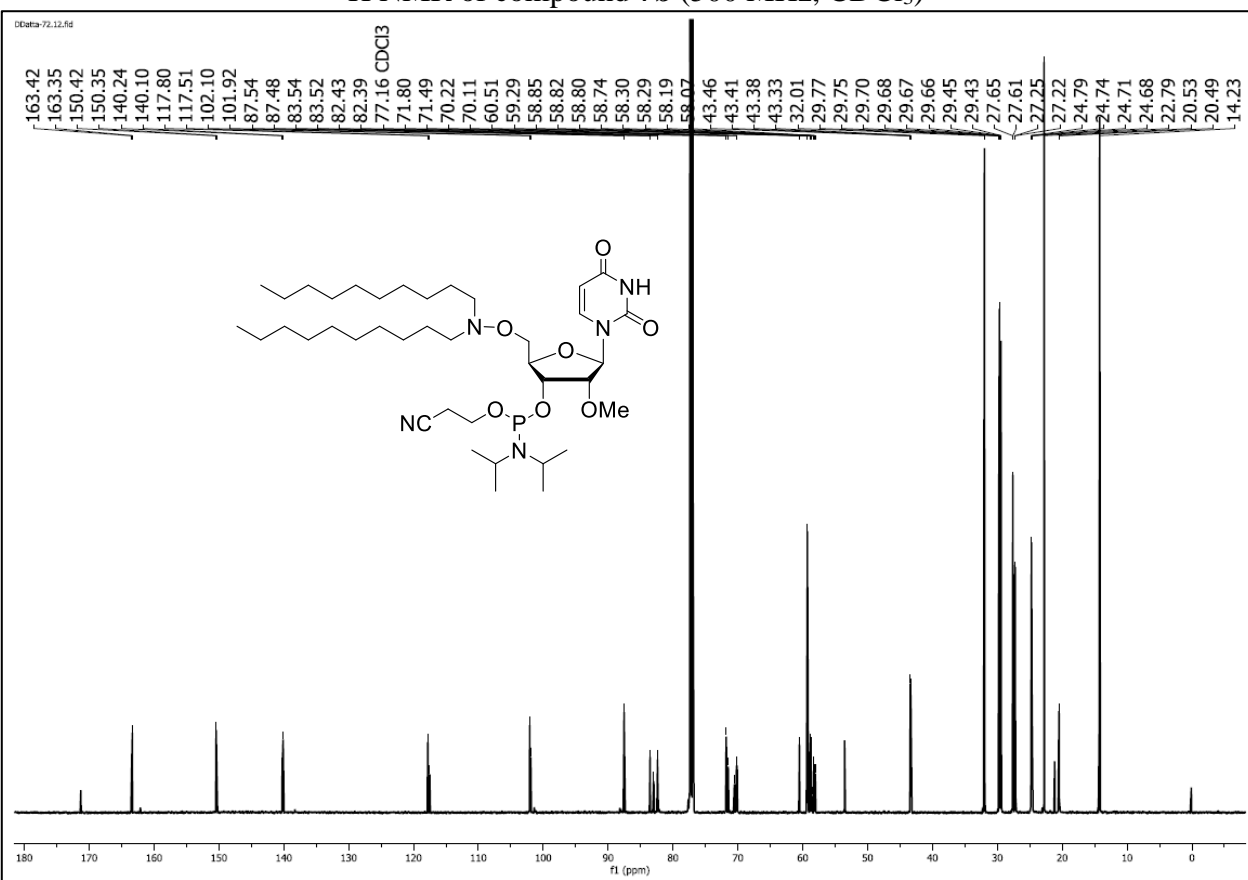

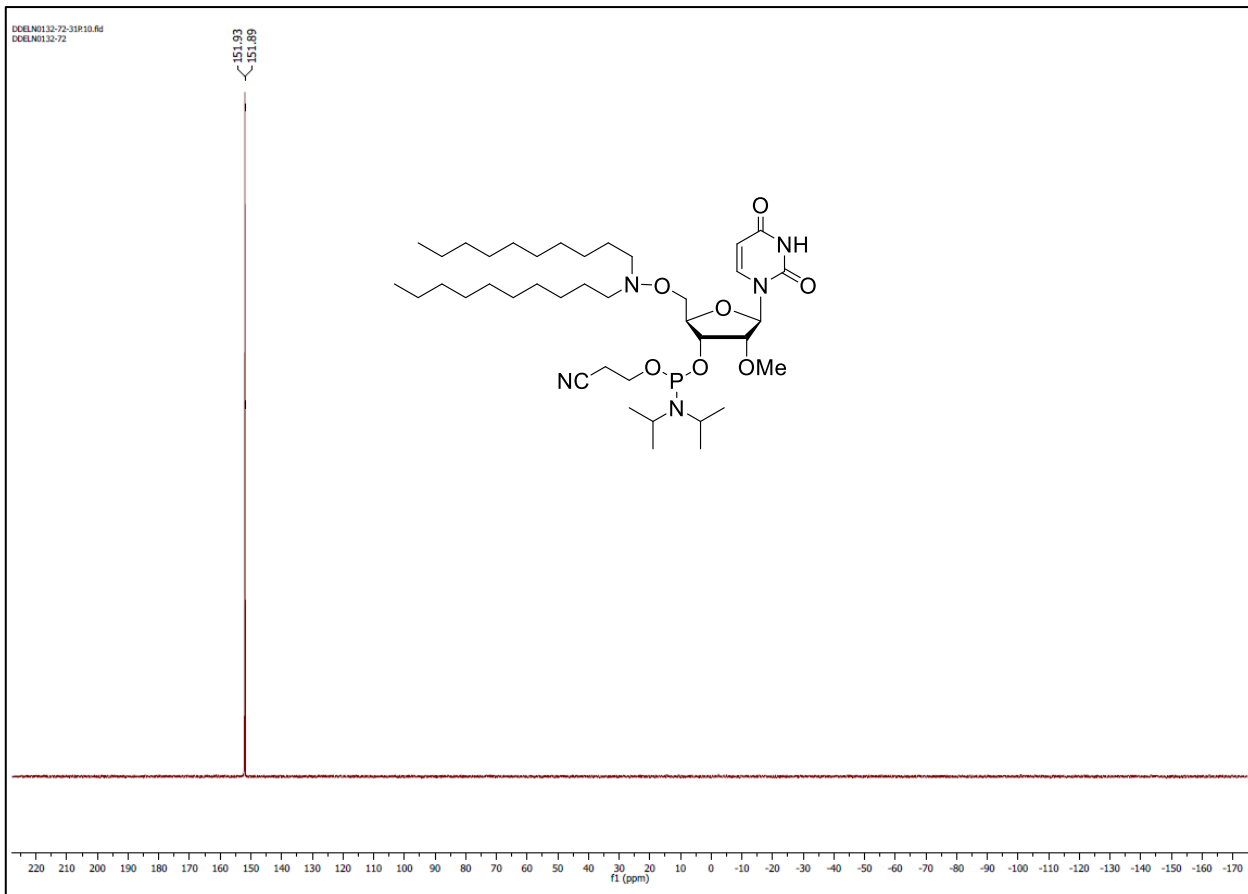

$^{31}\text{P}$  NMR of compound **7b** (162 MHz,  $\text{CDCl}_3$ )

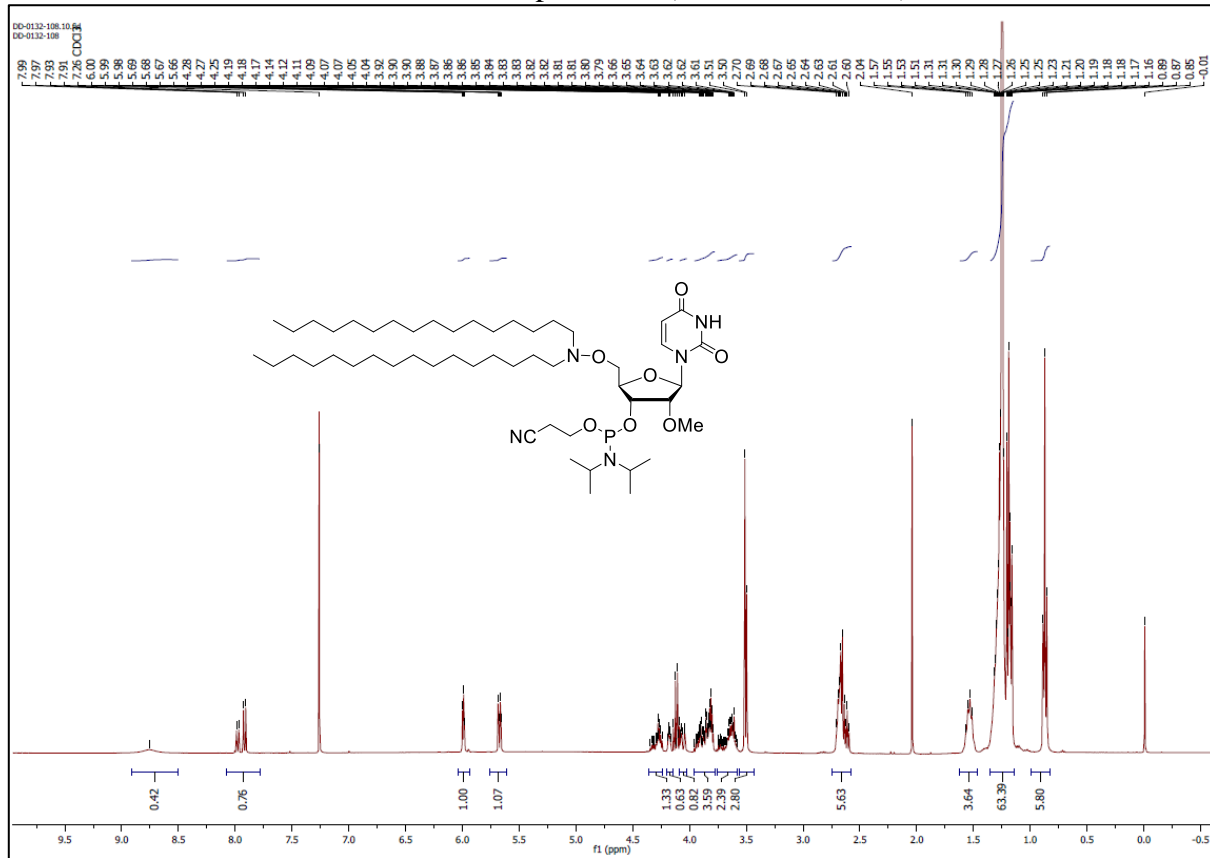

$^1\text{H}$  NMR of compound **7c** (400 MHz,  $\text{CDCl}_3$ )

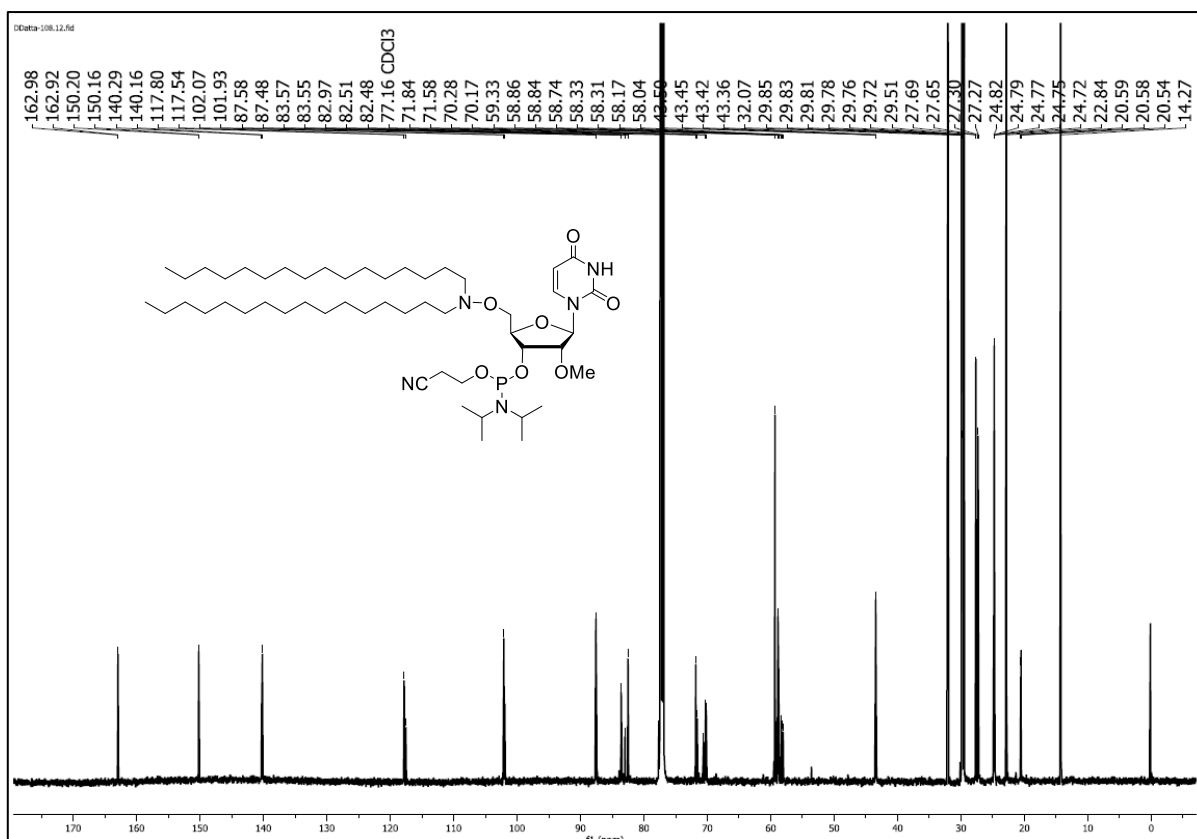

$^{13}\text{C}$  NMR of compound 7c (151 MHz,  $\text{CDCl}_3$ )

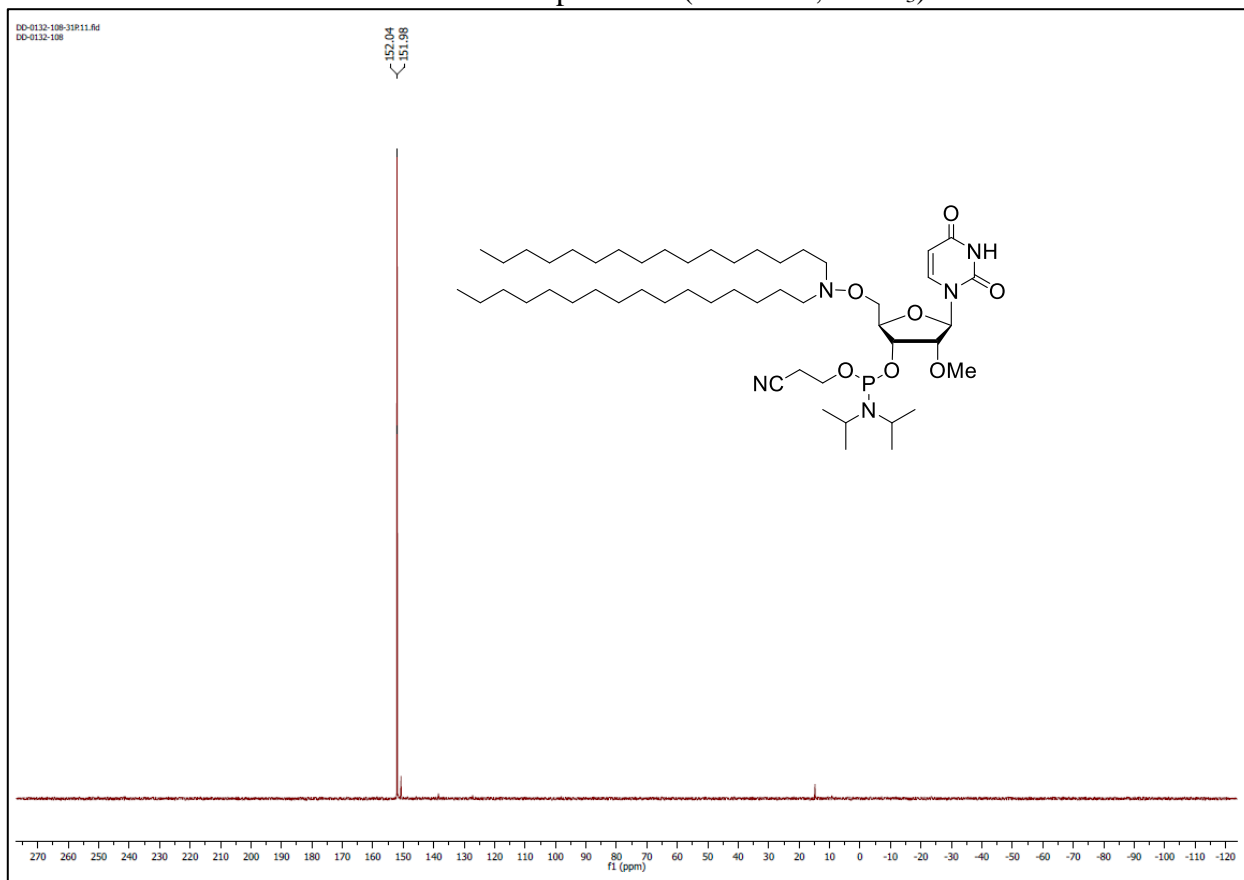

$^{31}\text{P}$  NMR of compound 7c (162 MHz,  $\text{CDCl}_3$ )

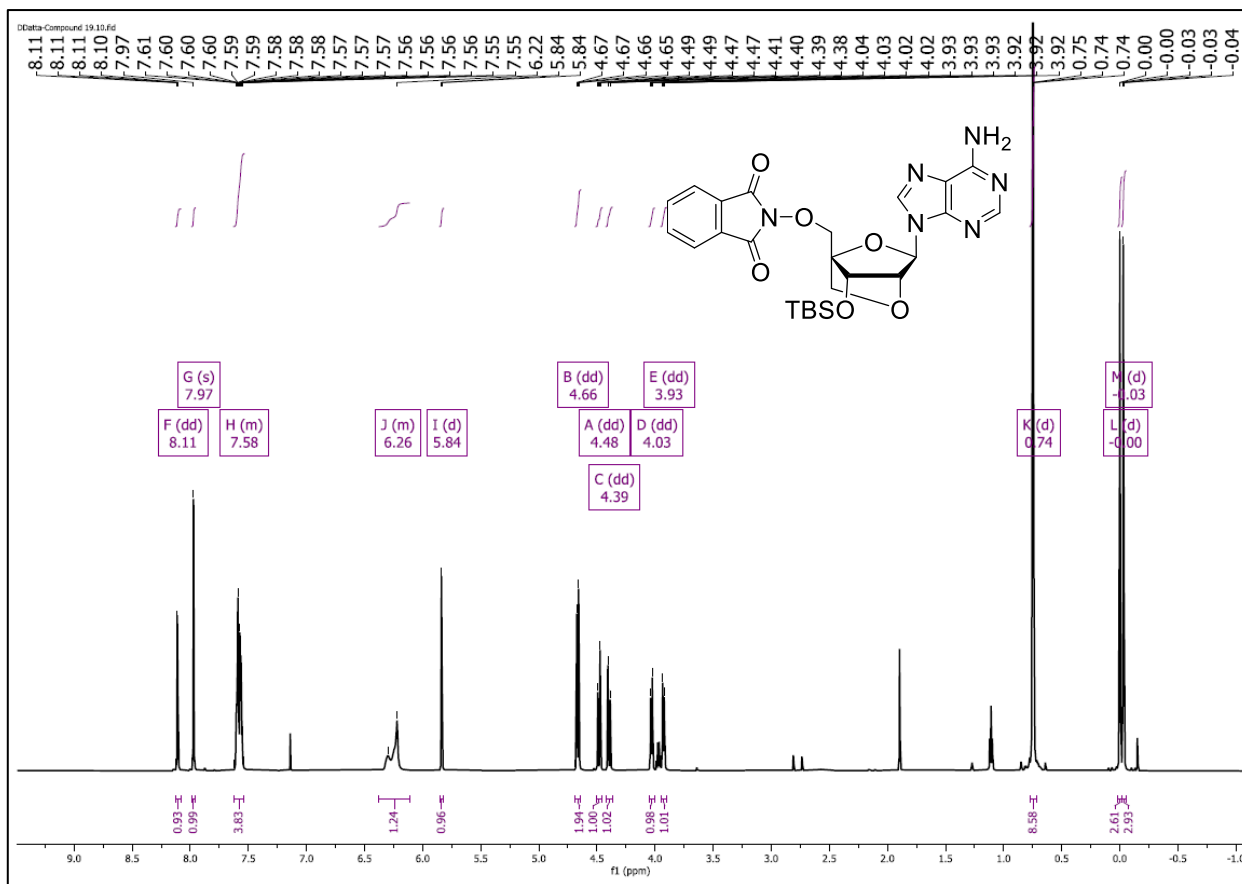

<sup>1</sup>H NMR of compound **9** (600 MHz, CDCl<sub>3</sub>)

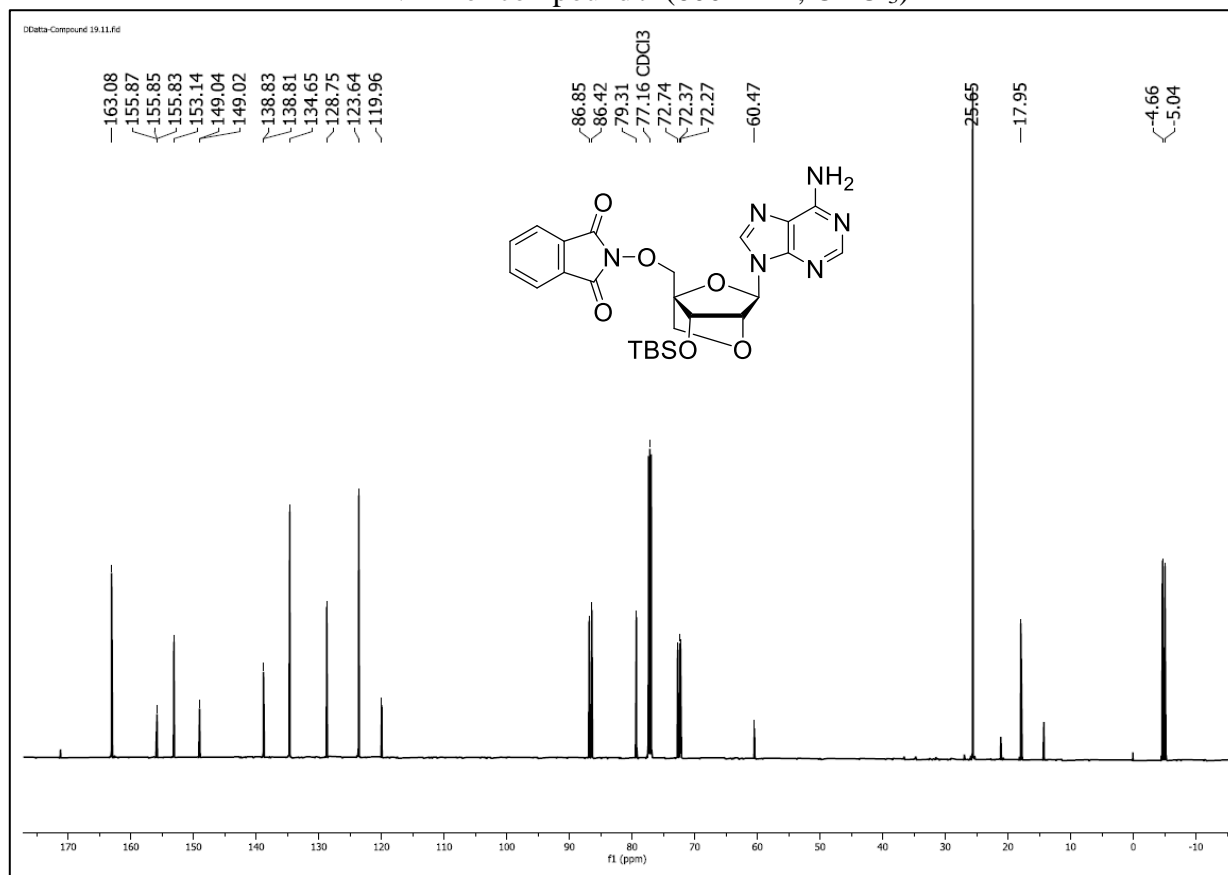

<sup>13</sup>C NMR of compound **9** (151 MHz, CDCl<sub>3</sub>)

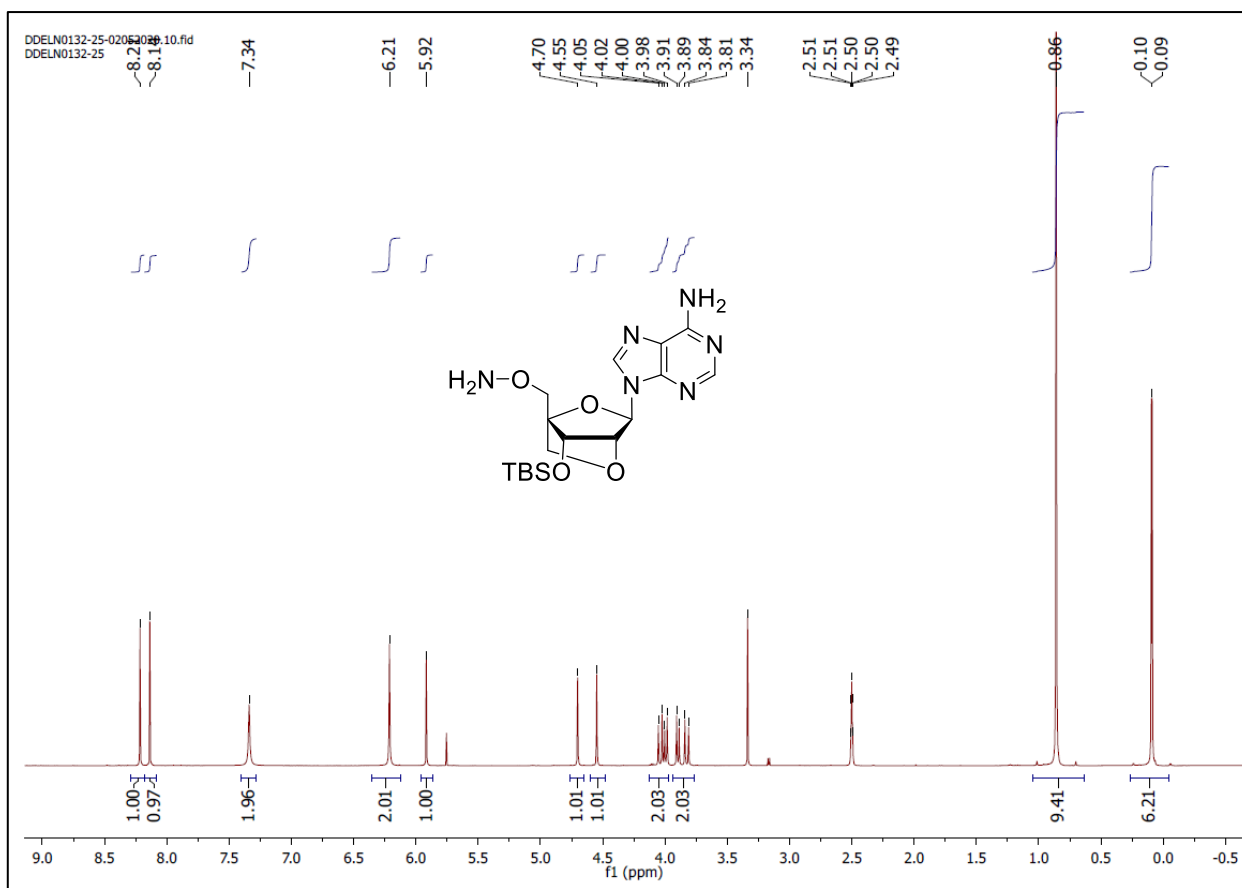

$^1\text{H}$  NMR of compound **10** (400 MHz,  $\text{DMSO}-d_6$ )

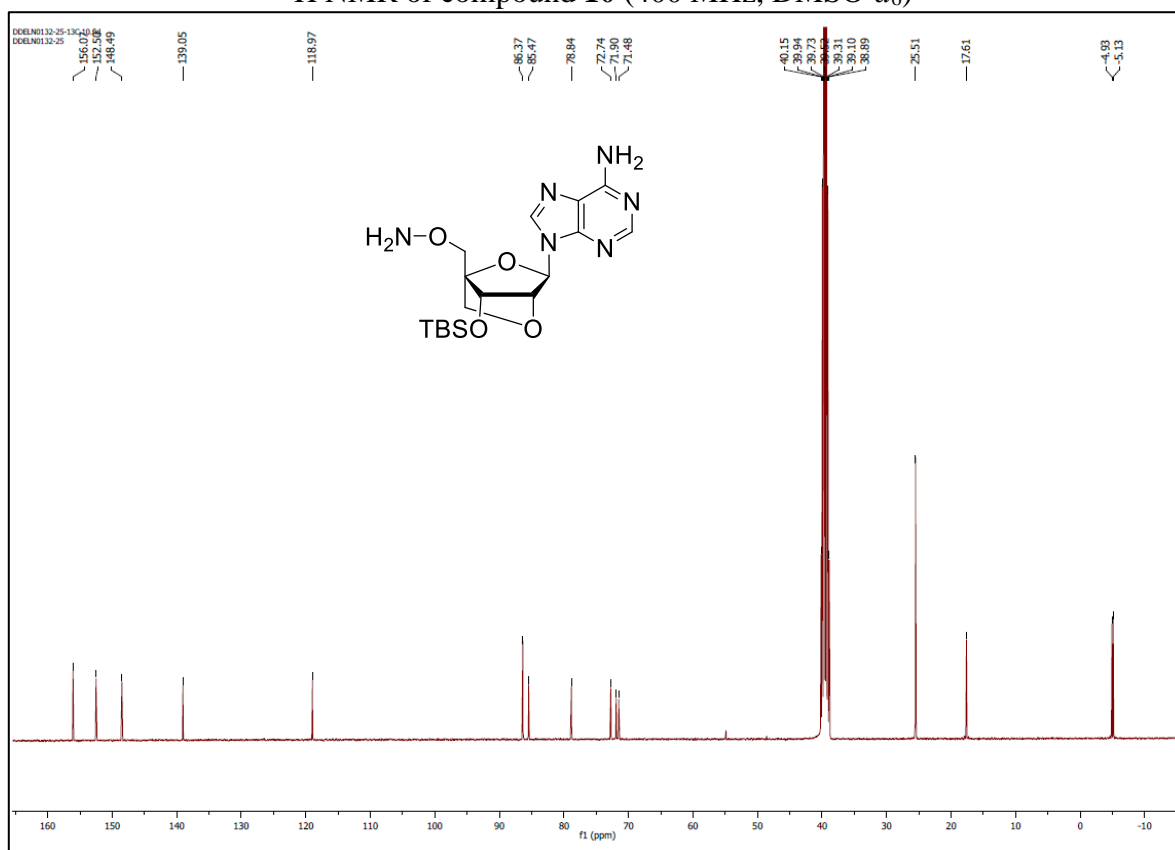

$^{13}\text{C}$  NMR of compound **10** (101 MHz,  $\text{DMSO}-d_6$ )

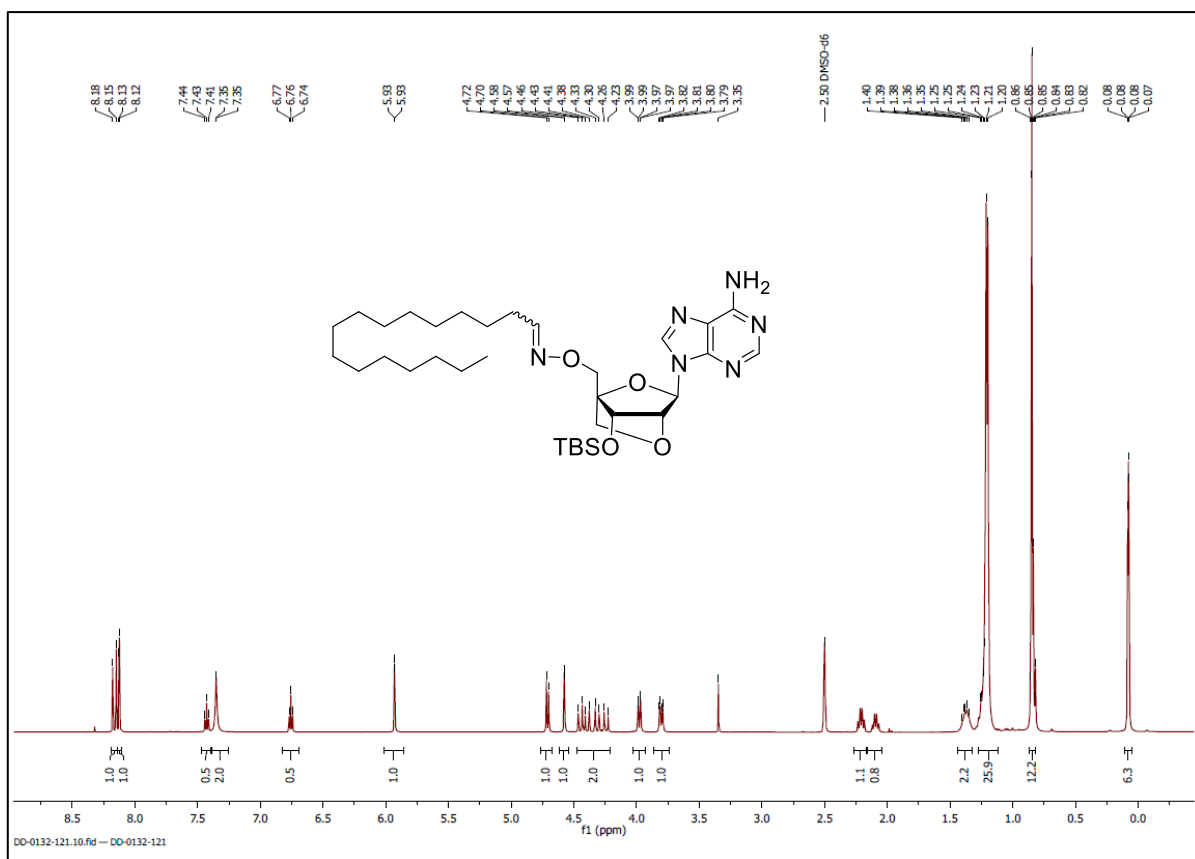

<sup>1</sup>H NMR of compound **11** (400 MHz, DMSO-d<sub>6</sub>)

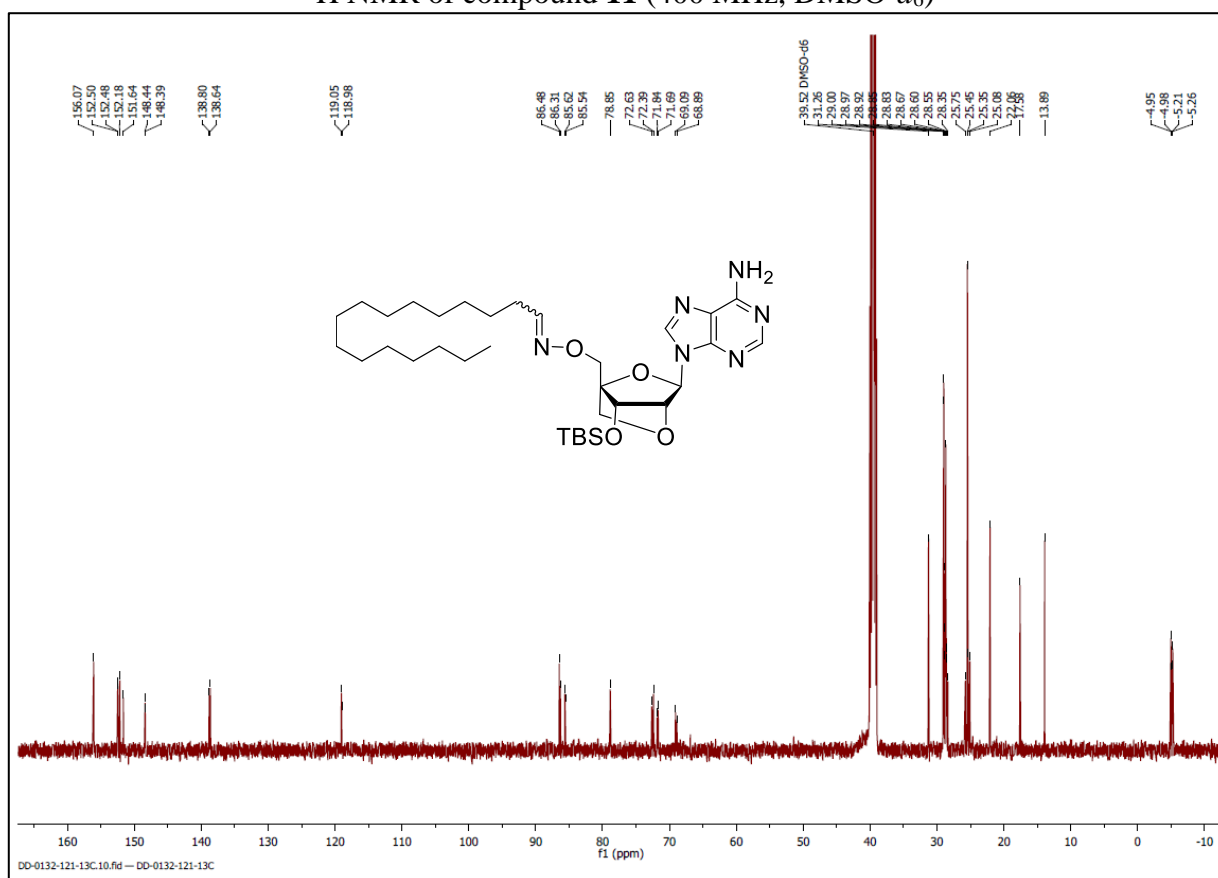

<sup>13</sup>C NMR of compound **11** (126 MHz, DMSO-d<sub>6</sub>)



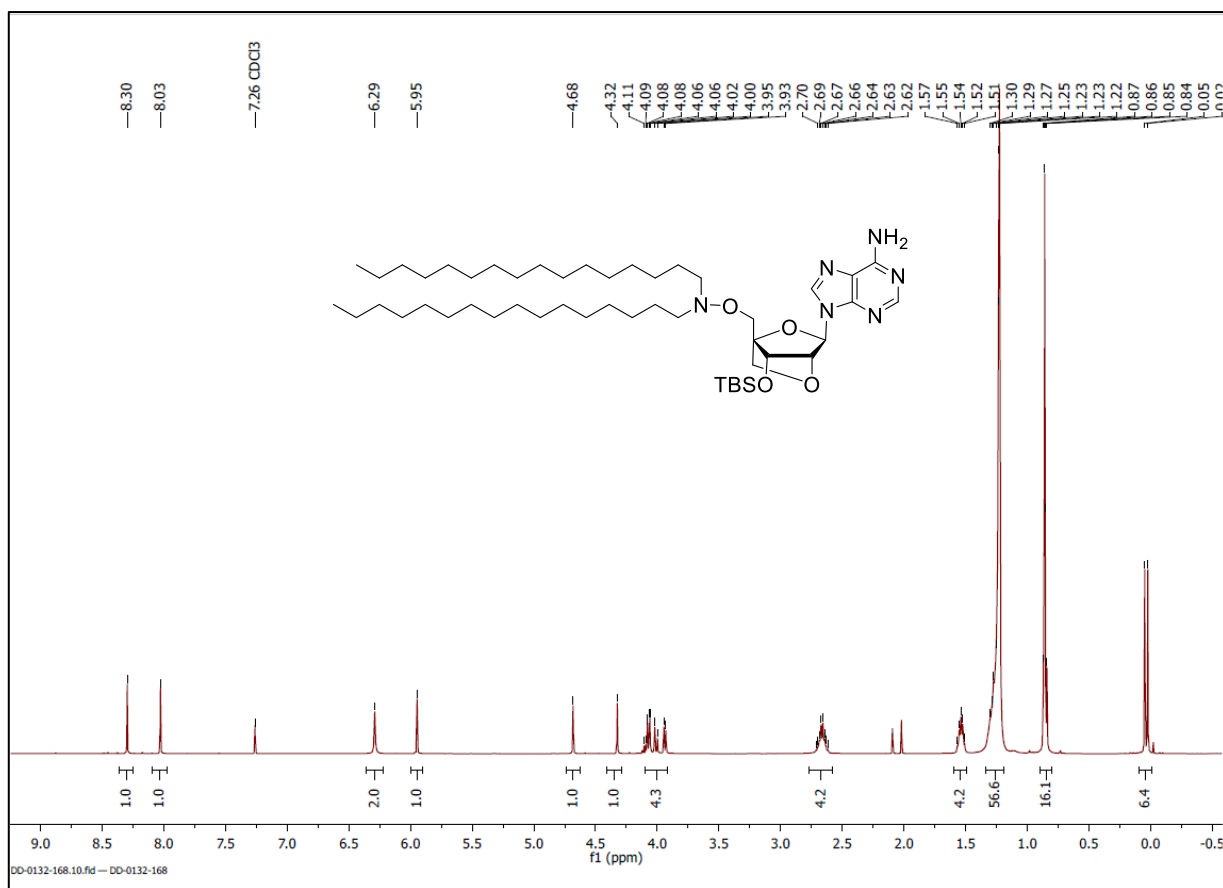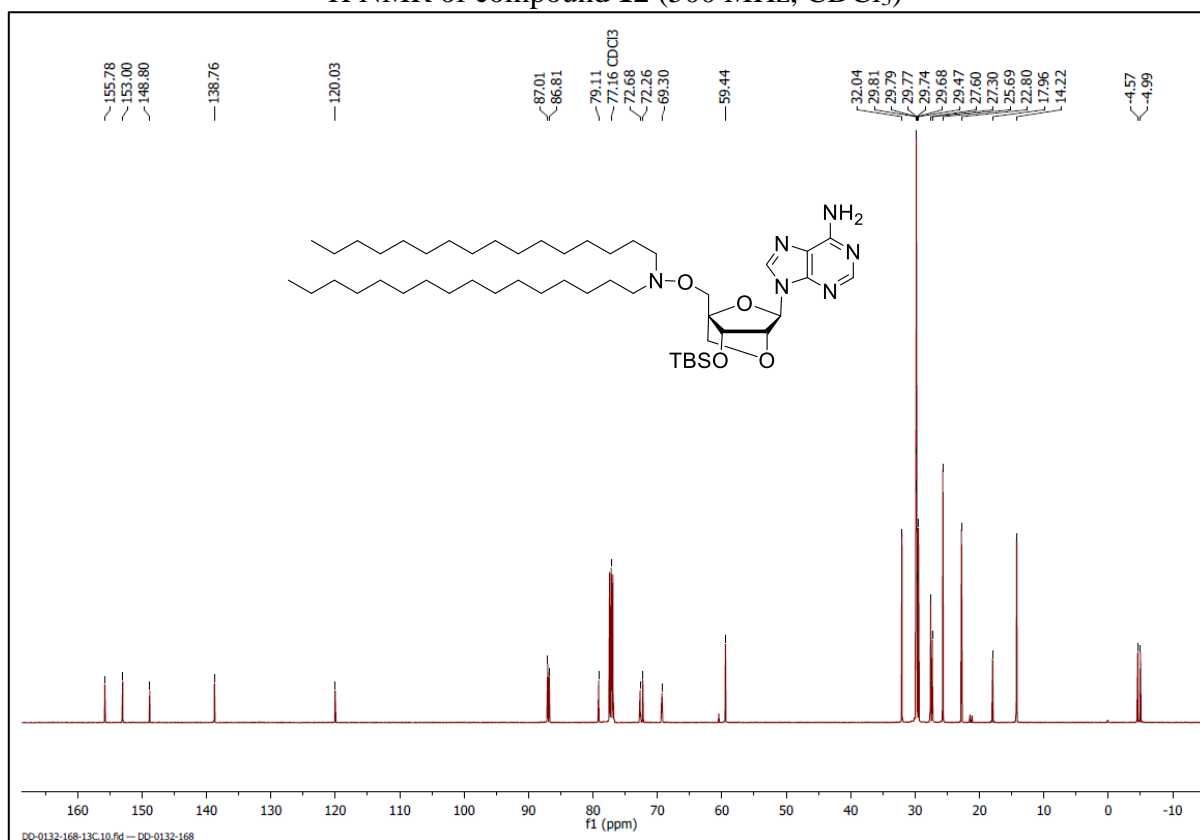

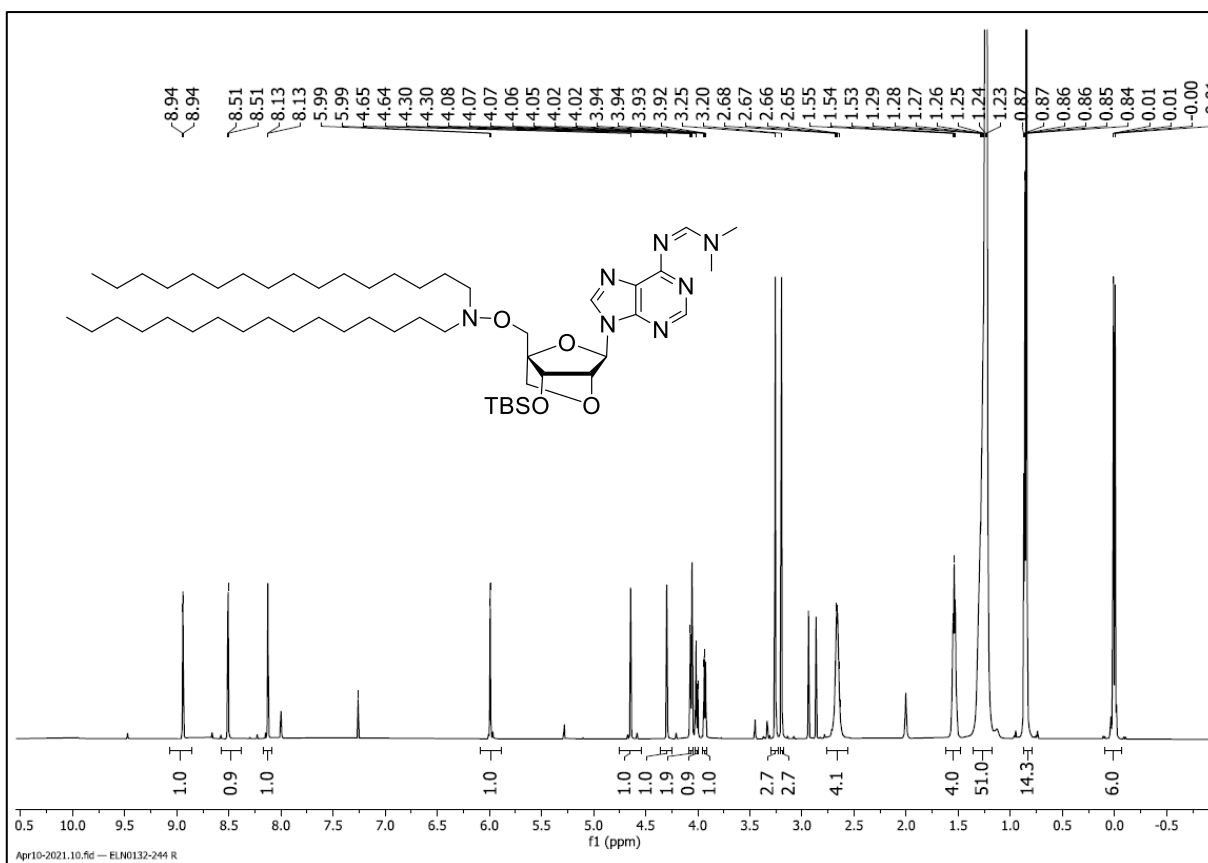

<sup>1</sup>H NMR of compound 13 (600 MHz, CDCl<sub>3</sub>)

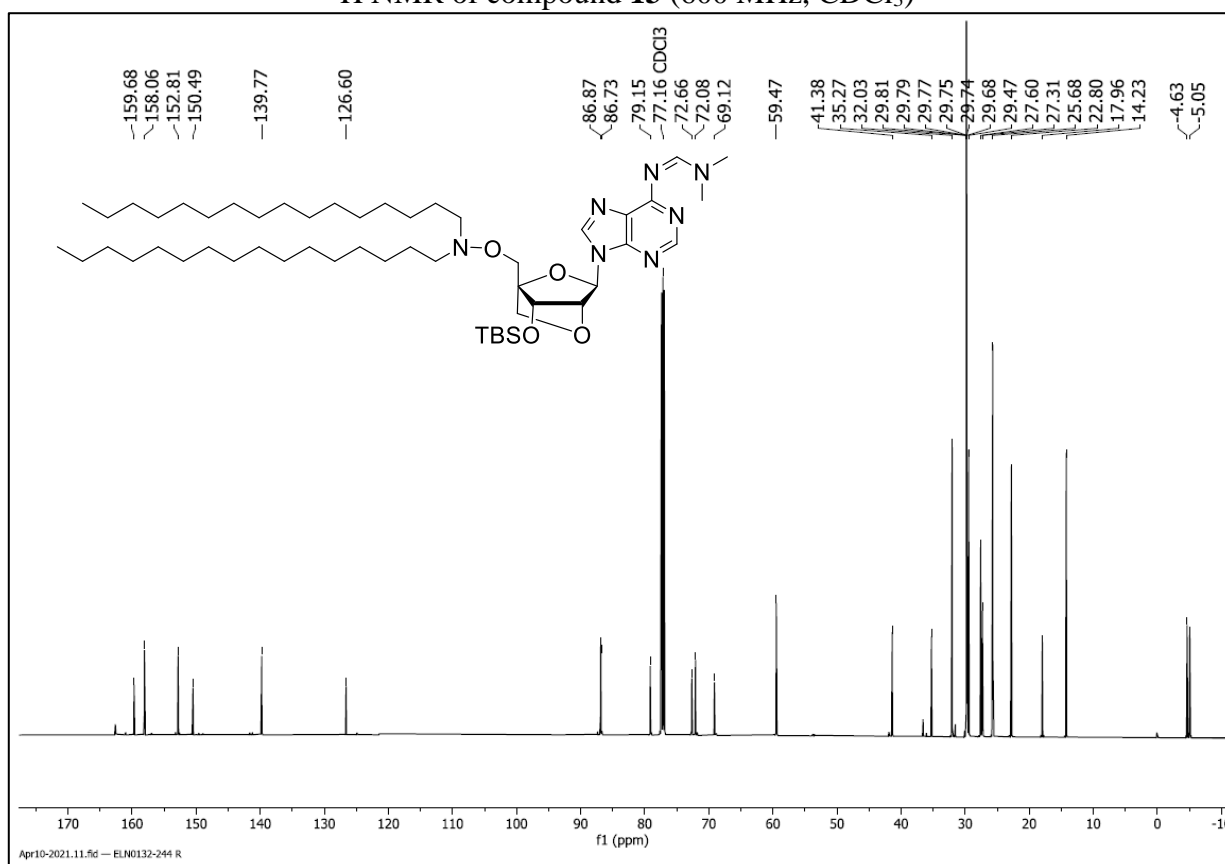

<sup>13</sup>C NMR of compound 13 (151 MHz, CDCl<sub>3</sub>)

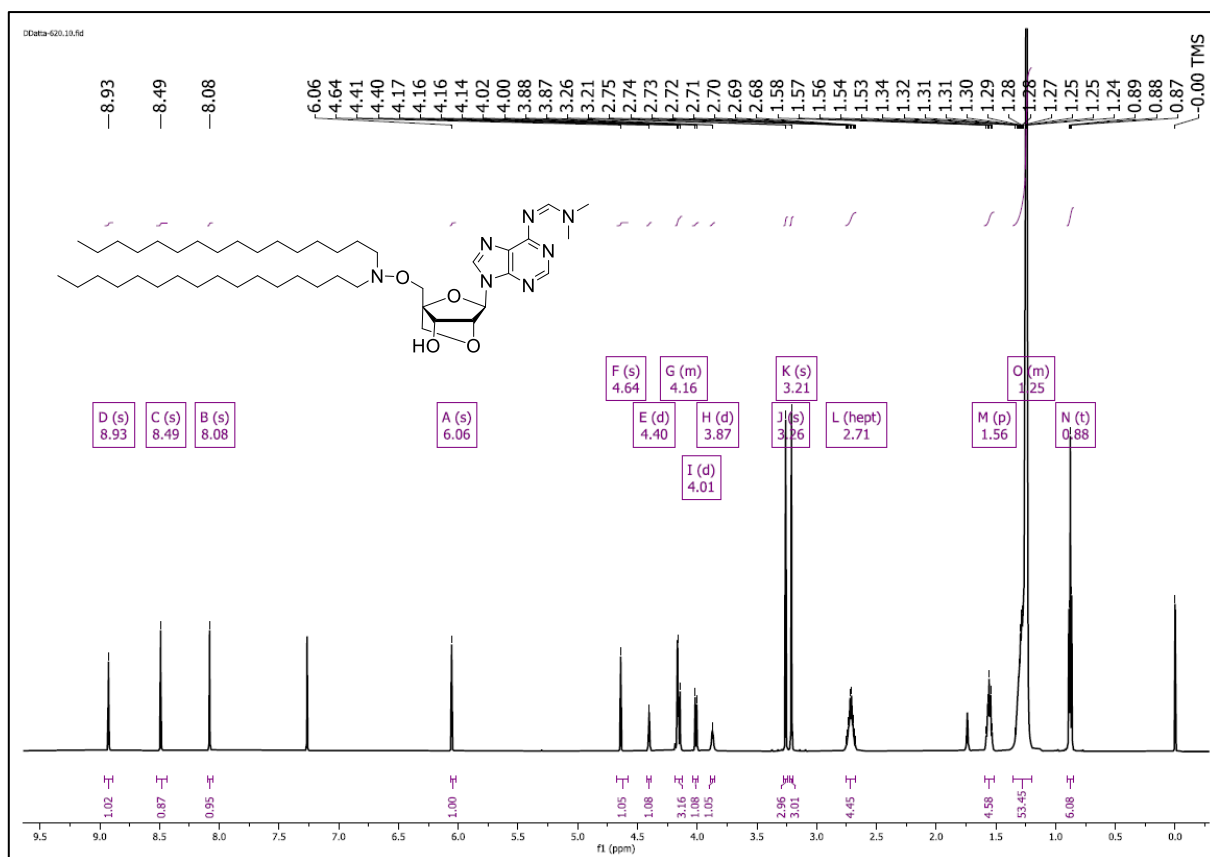

<sup>1</sup>H NMR of compound 14 (600 MHz, CDCl<sub>3</sub>)

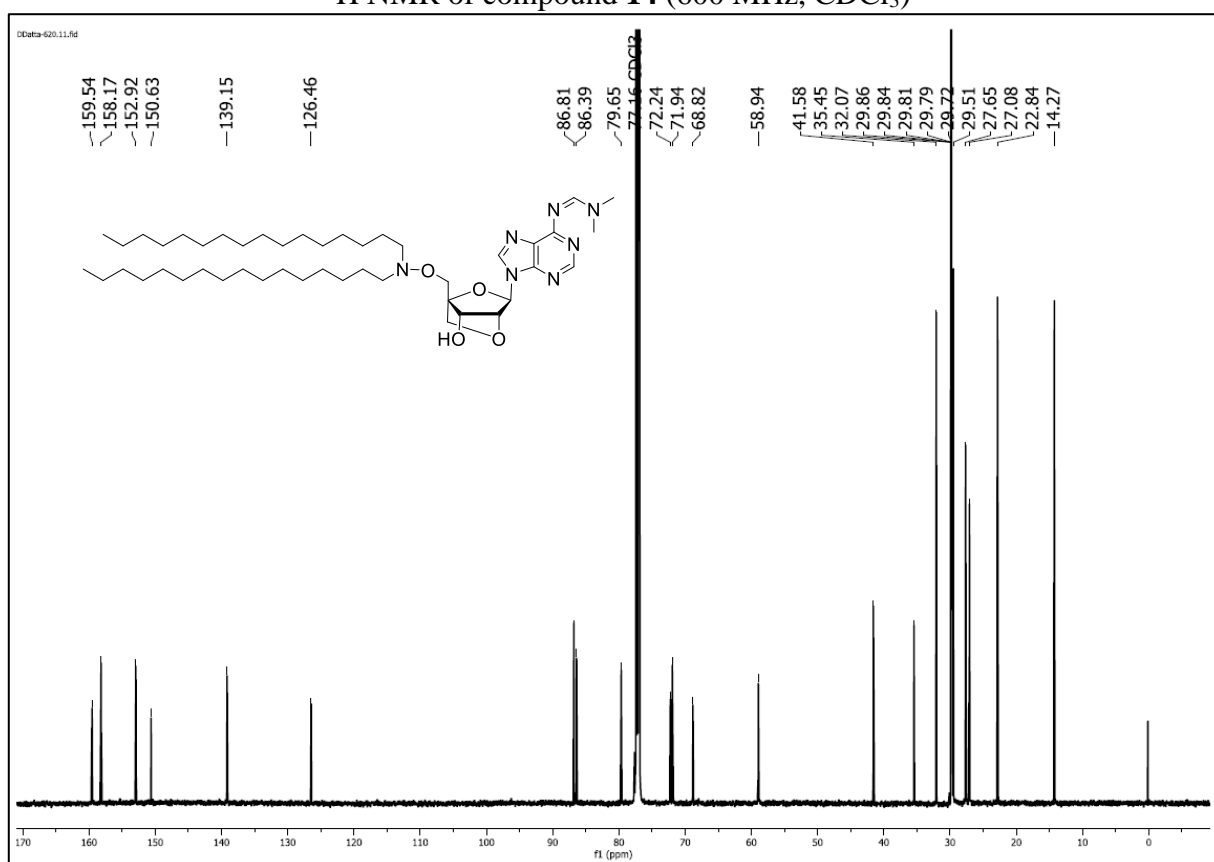

<sup>13</sup>C NMR of compound 14 (151 MHz, CDCl<sub>3</sub>)

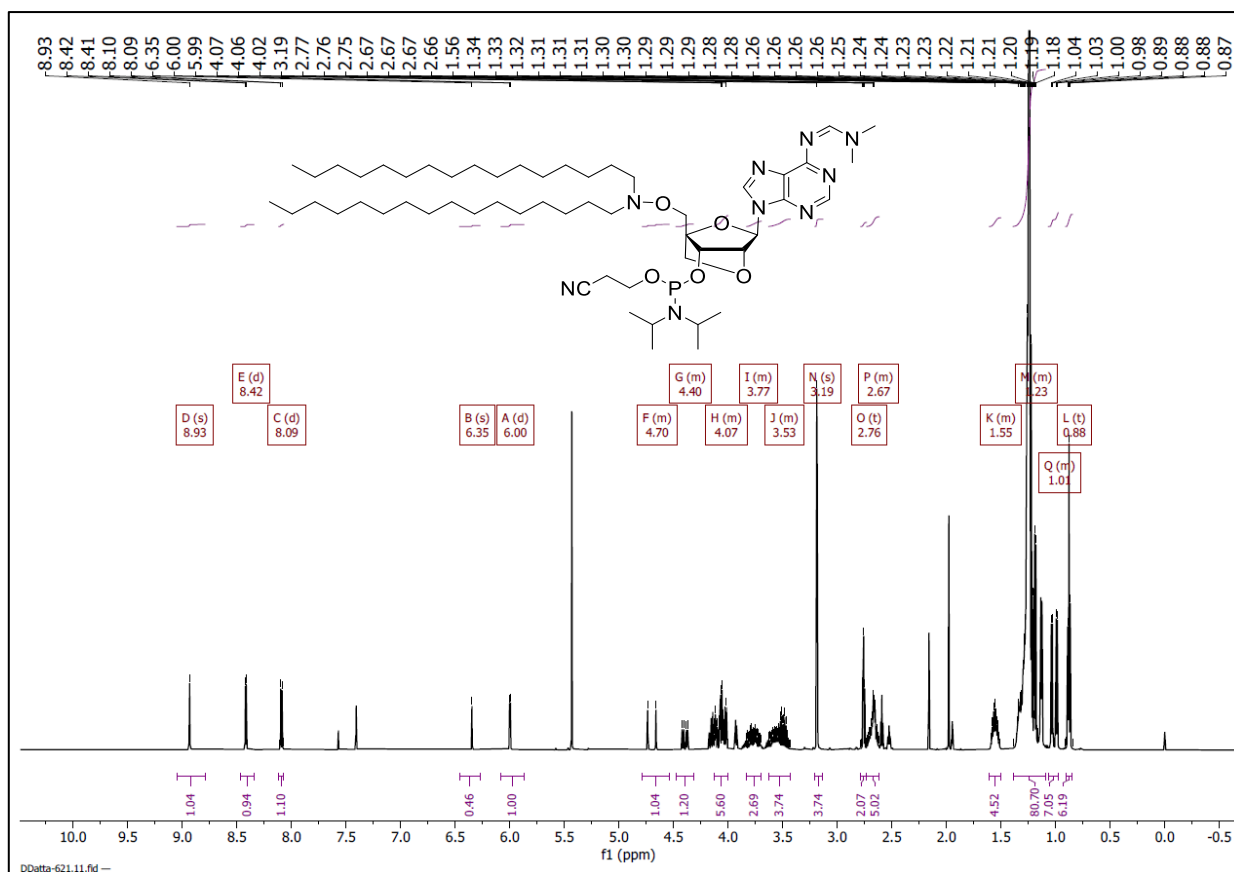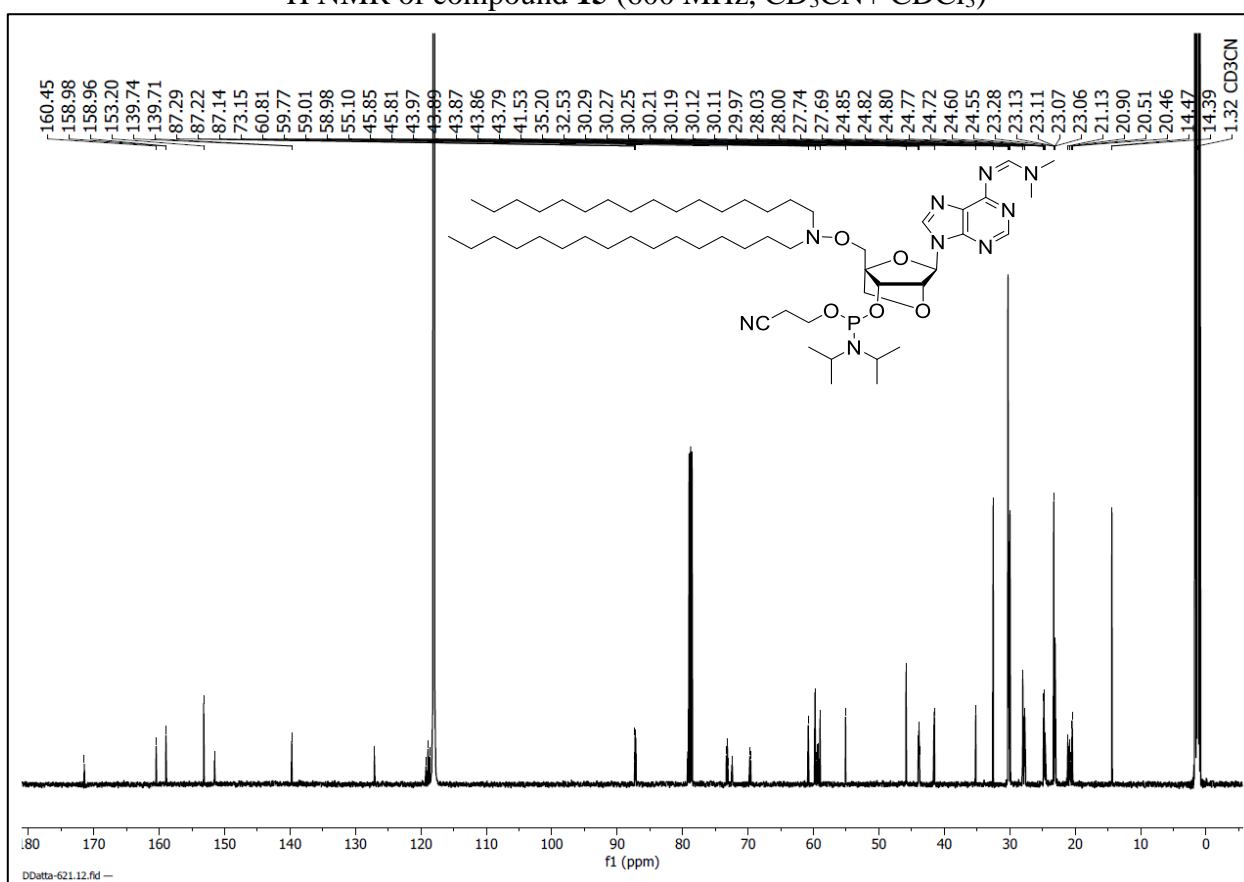

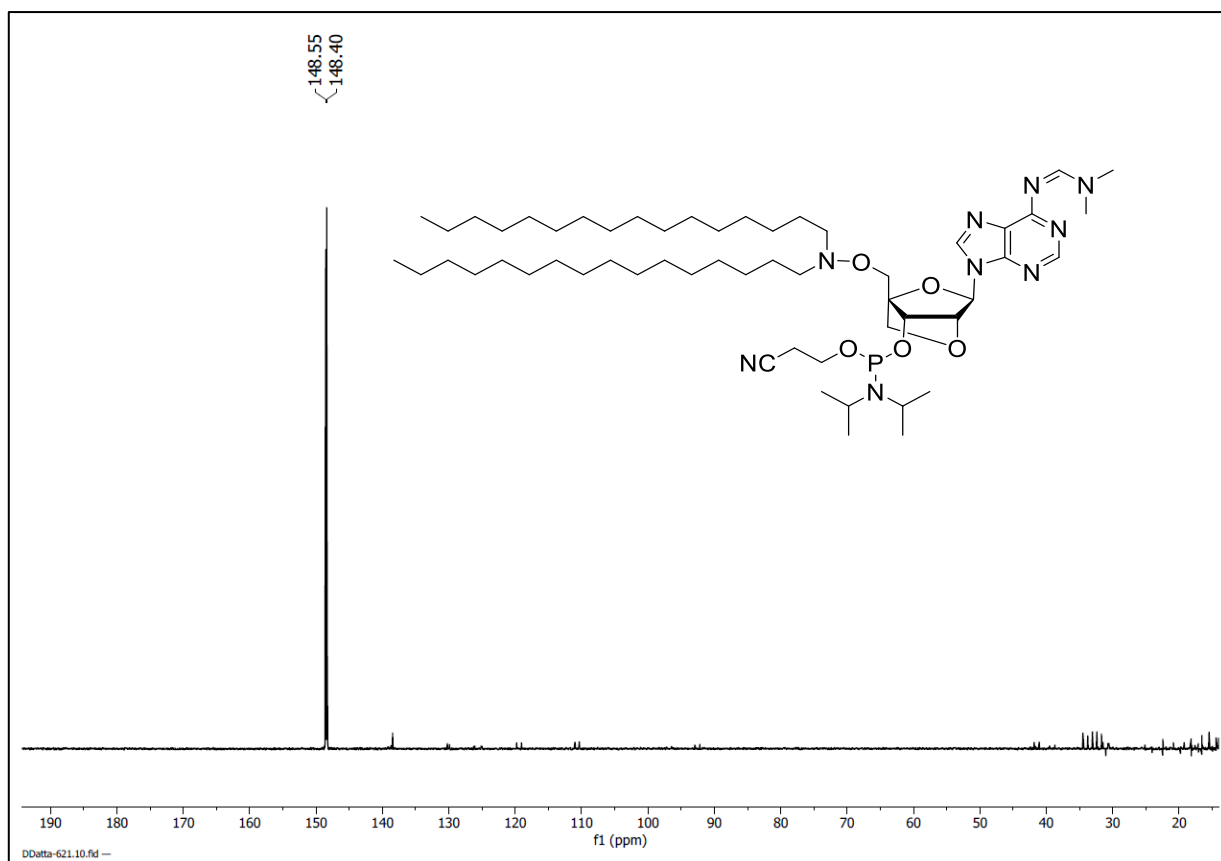

$^{31}\text{P}$  NMR of compound **15** (243 MHz,  $\text{CD}_3\text{CN} + \text{CDCl}_3$ )

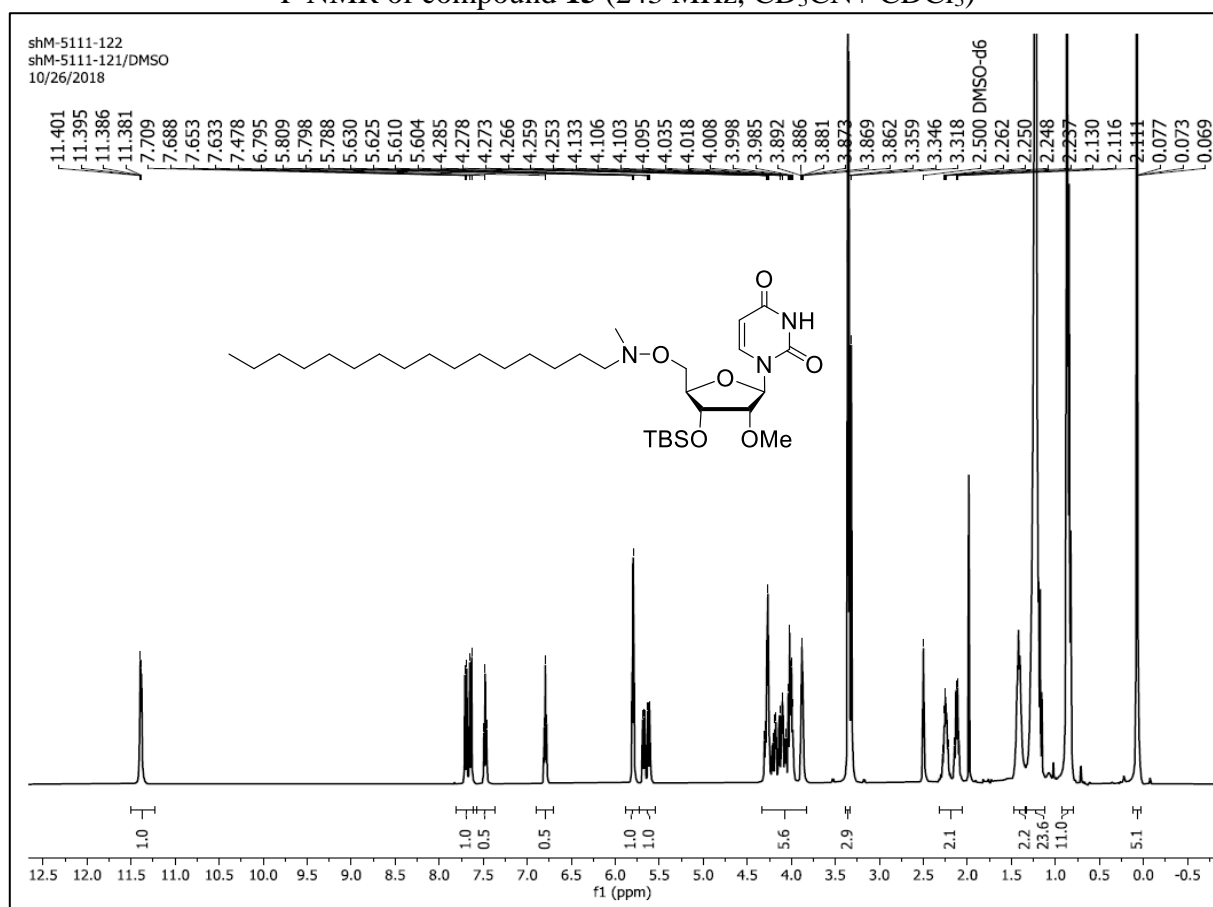

$^1\text{H}$  NMR of **16a** (400 MHz,  $\text{DMSO}-d_6$ )

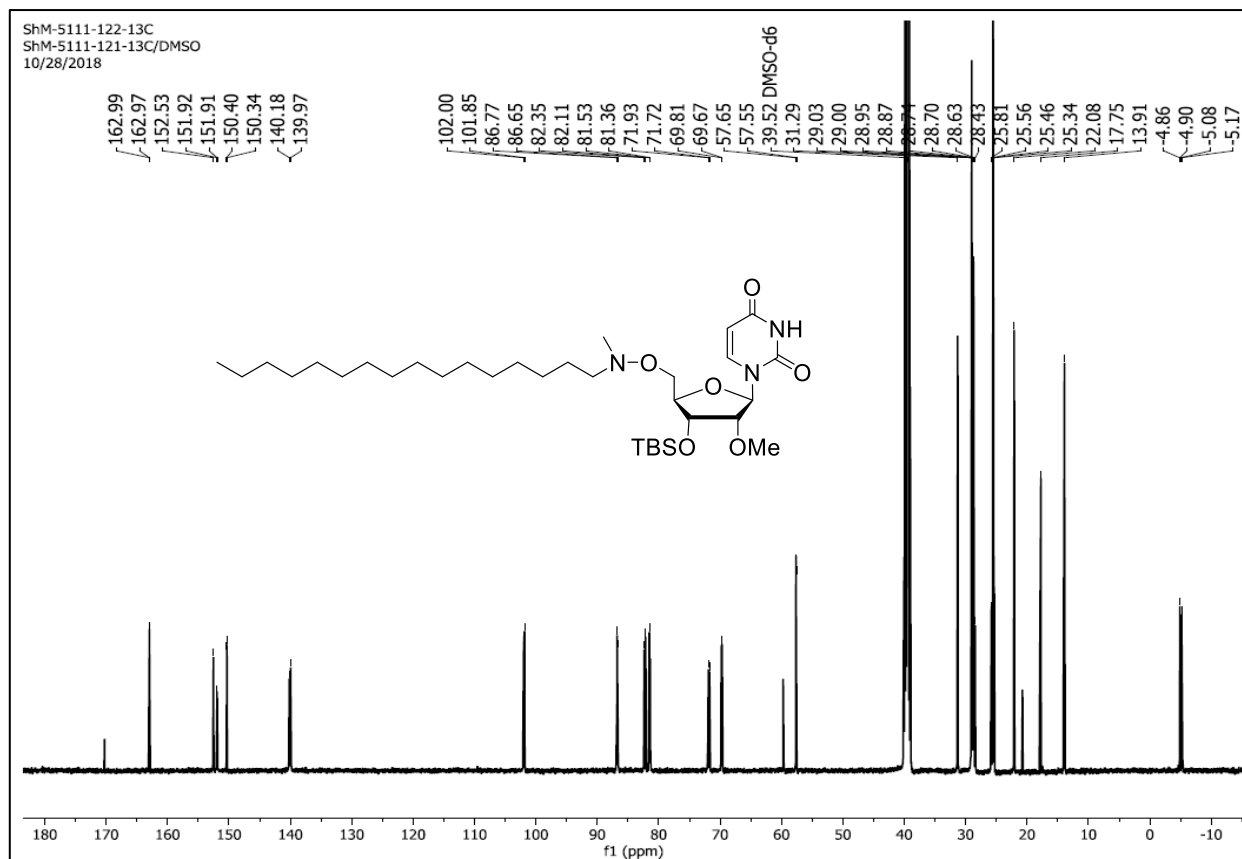

$^{13}\text{C}$  NMR of **16a** (101 MHz, DMSO- $d_6$ )

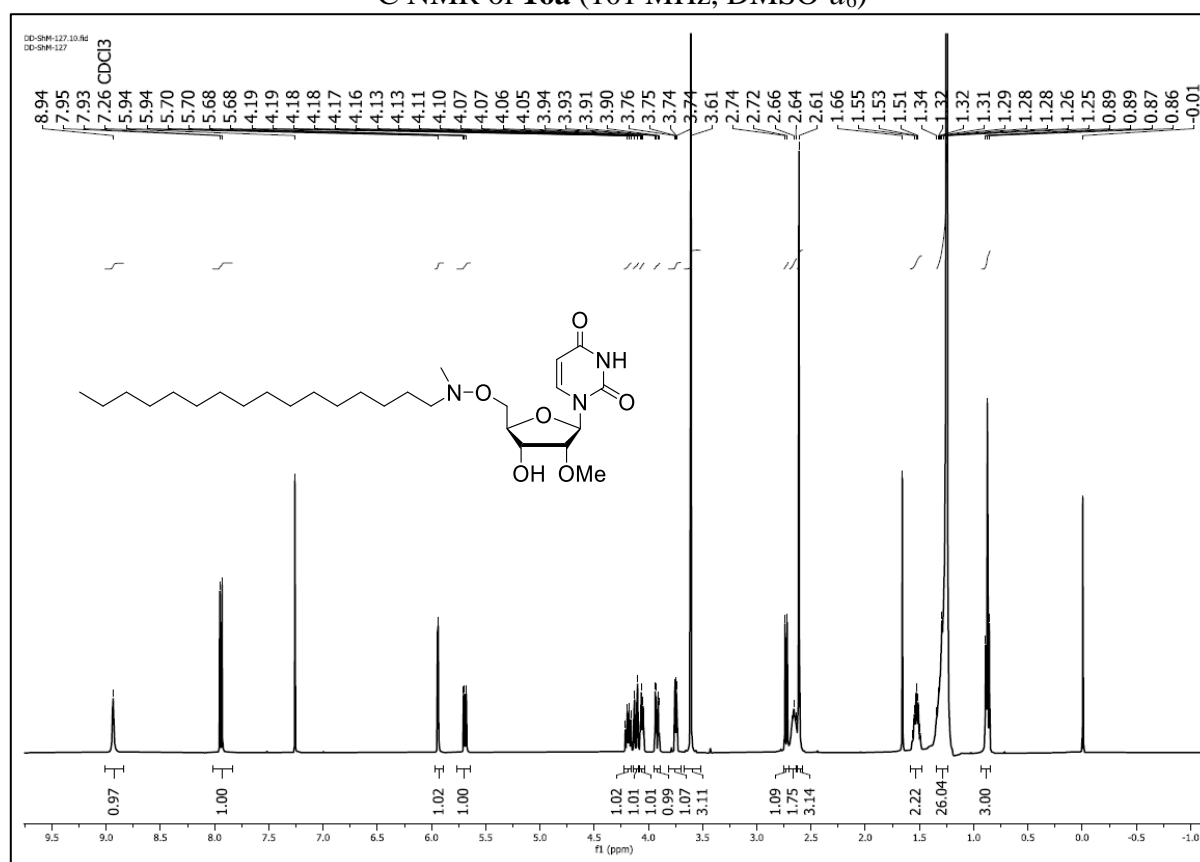

$^1\text{H}$  NMR of compound **17a** (400 MHz,  $\text{CDCl}_3$ )

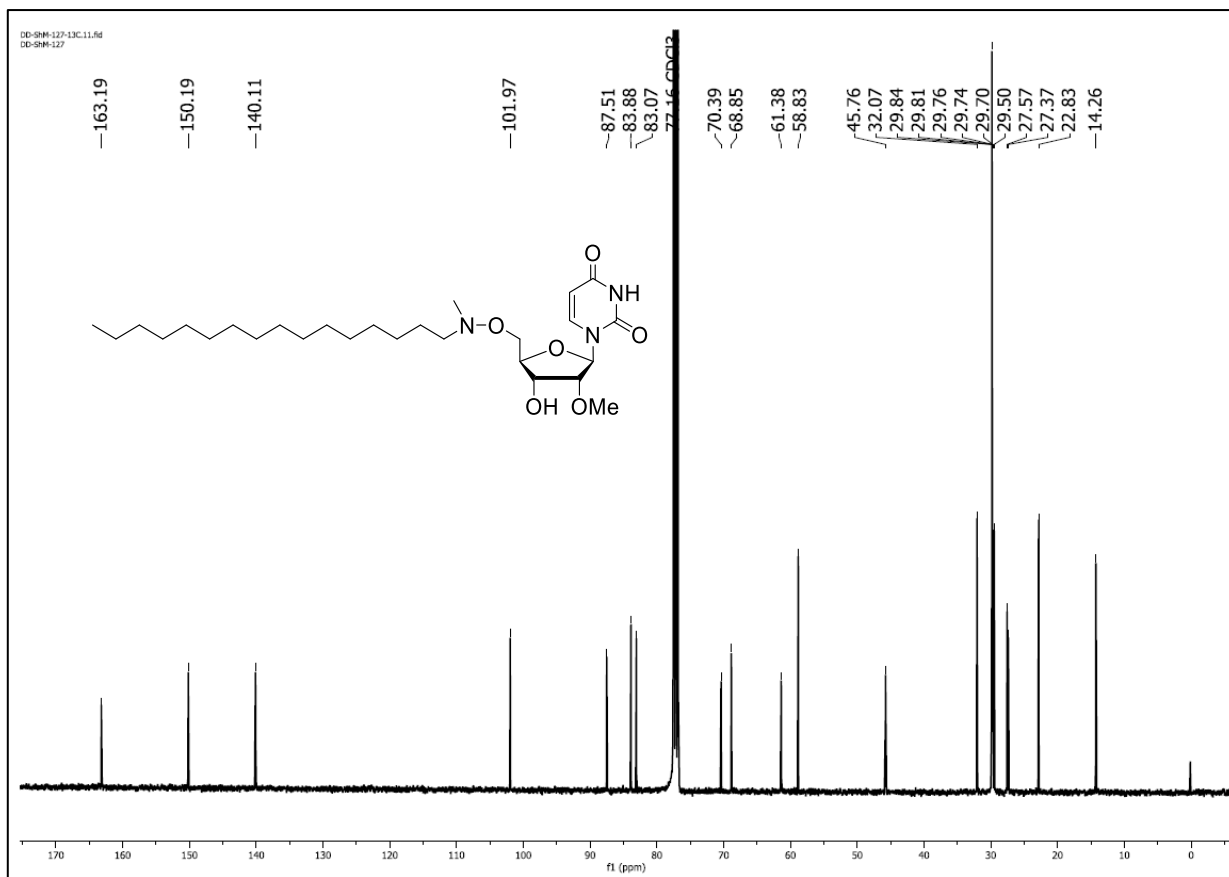

<sup>13</sup>C NMR of **17a** (101 MHz, CDCl<sub>3</sub>)

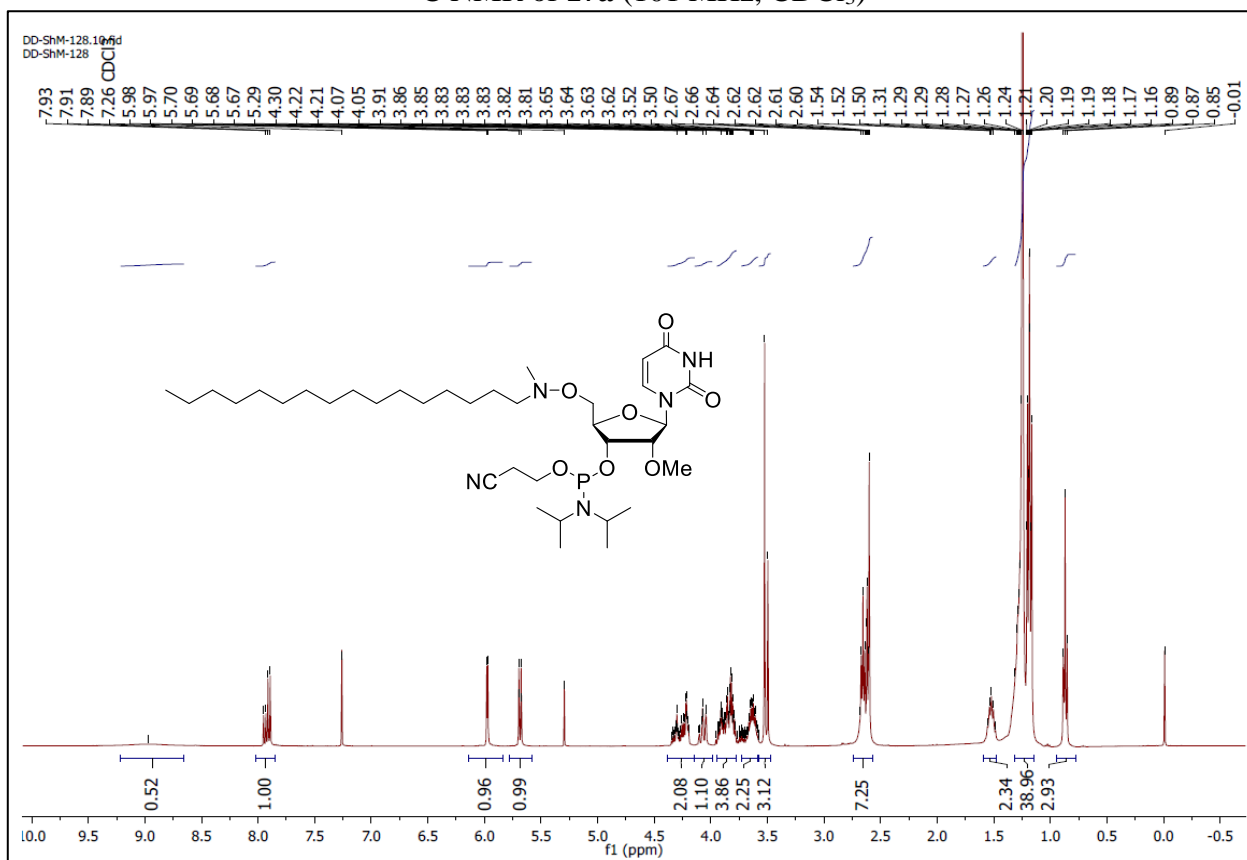

<sup>1</sup>H NMR of **18a** (400 MHz, CDCl<sub>3</sub>)

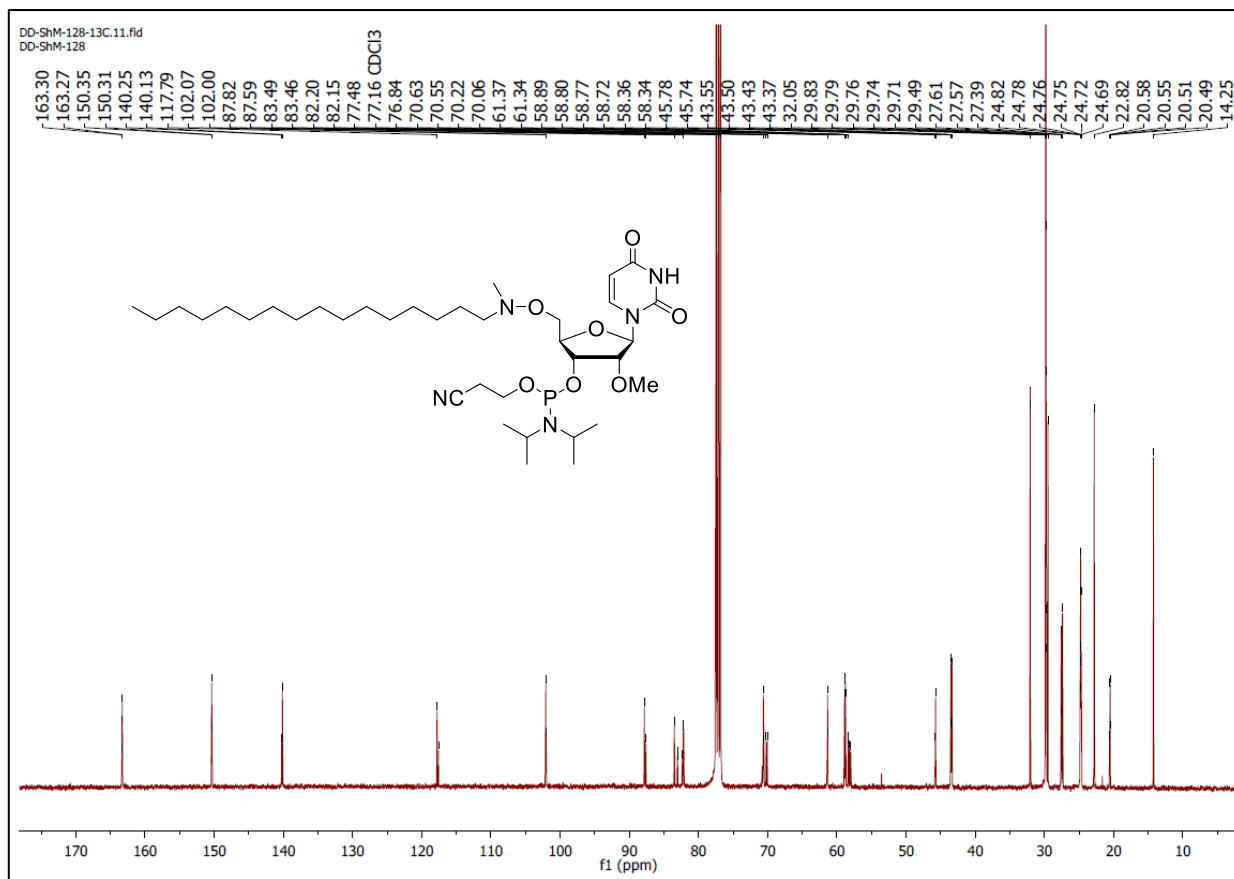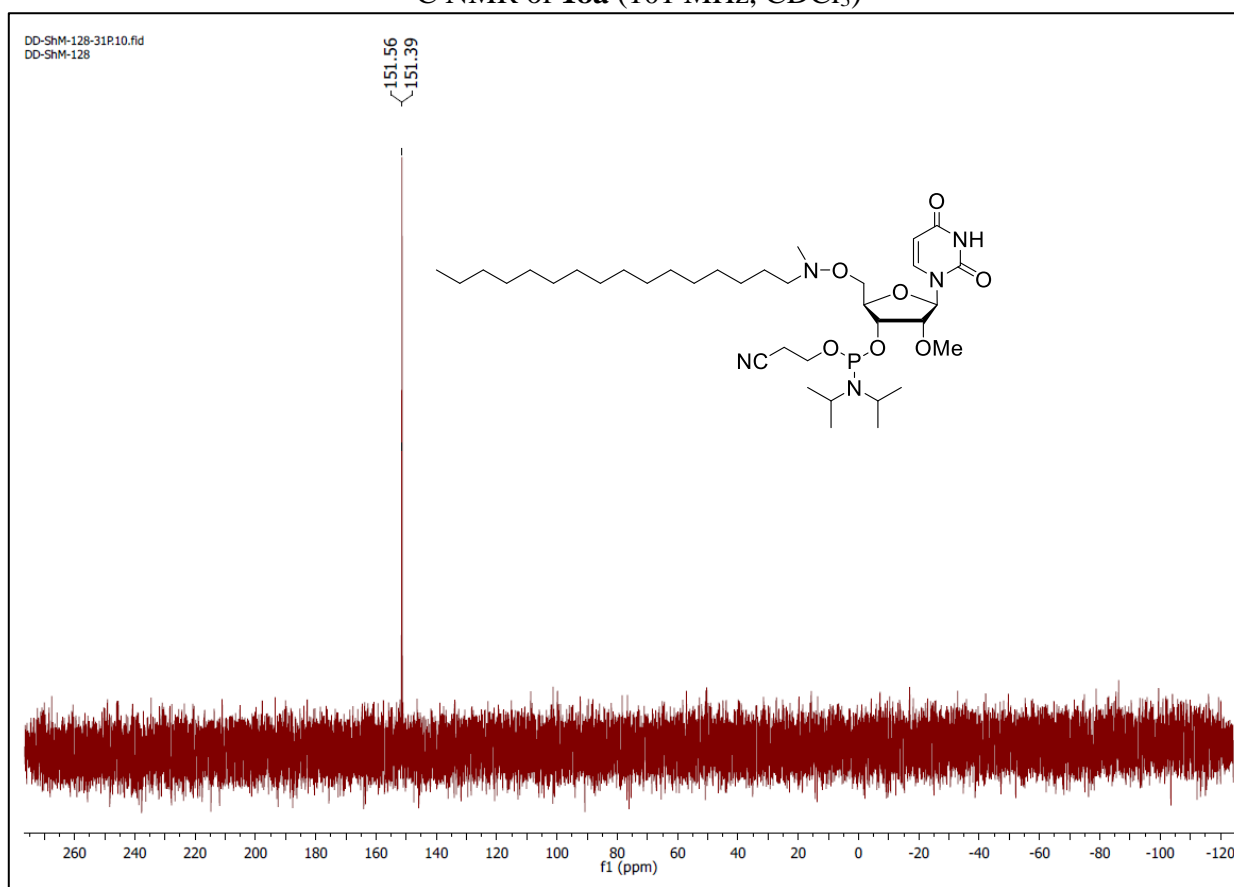



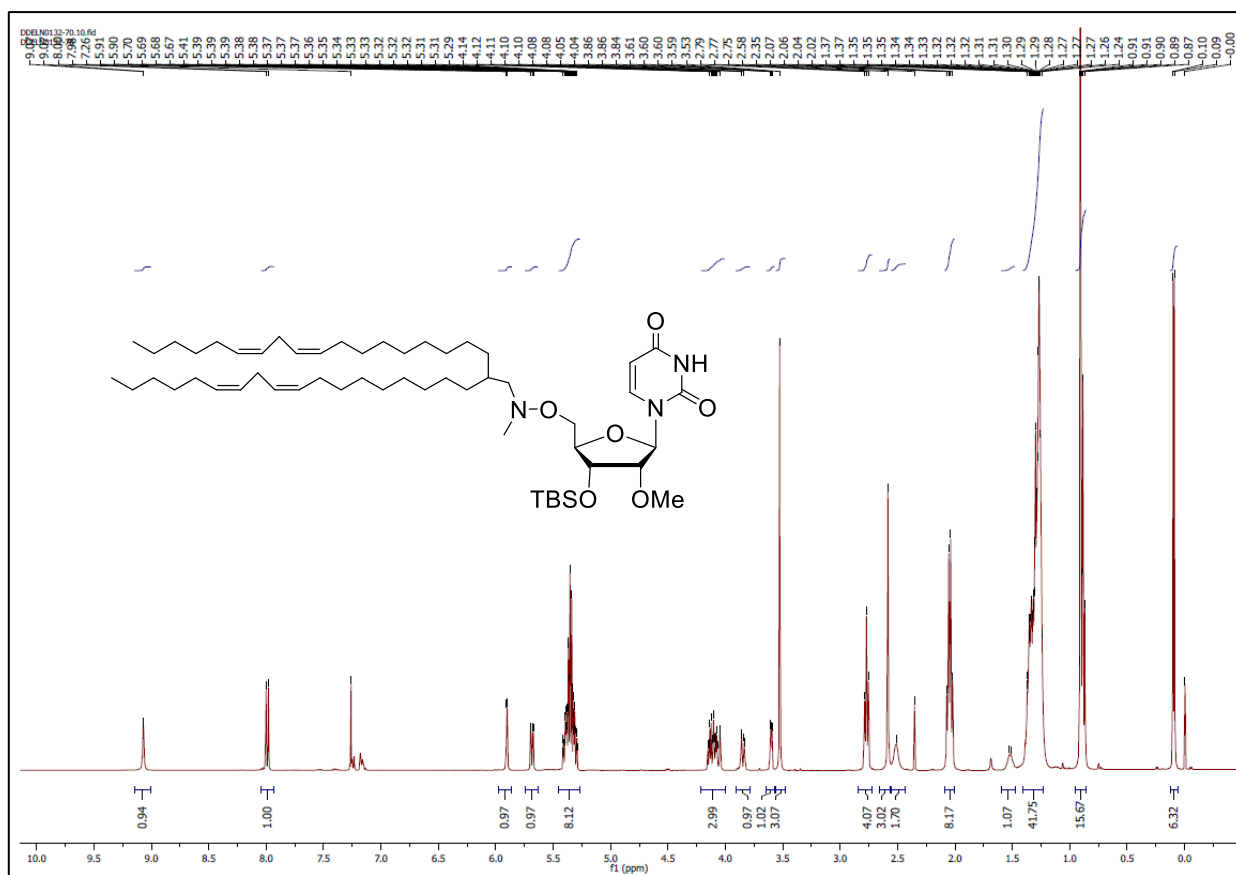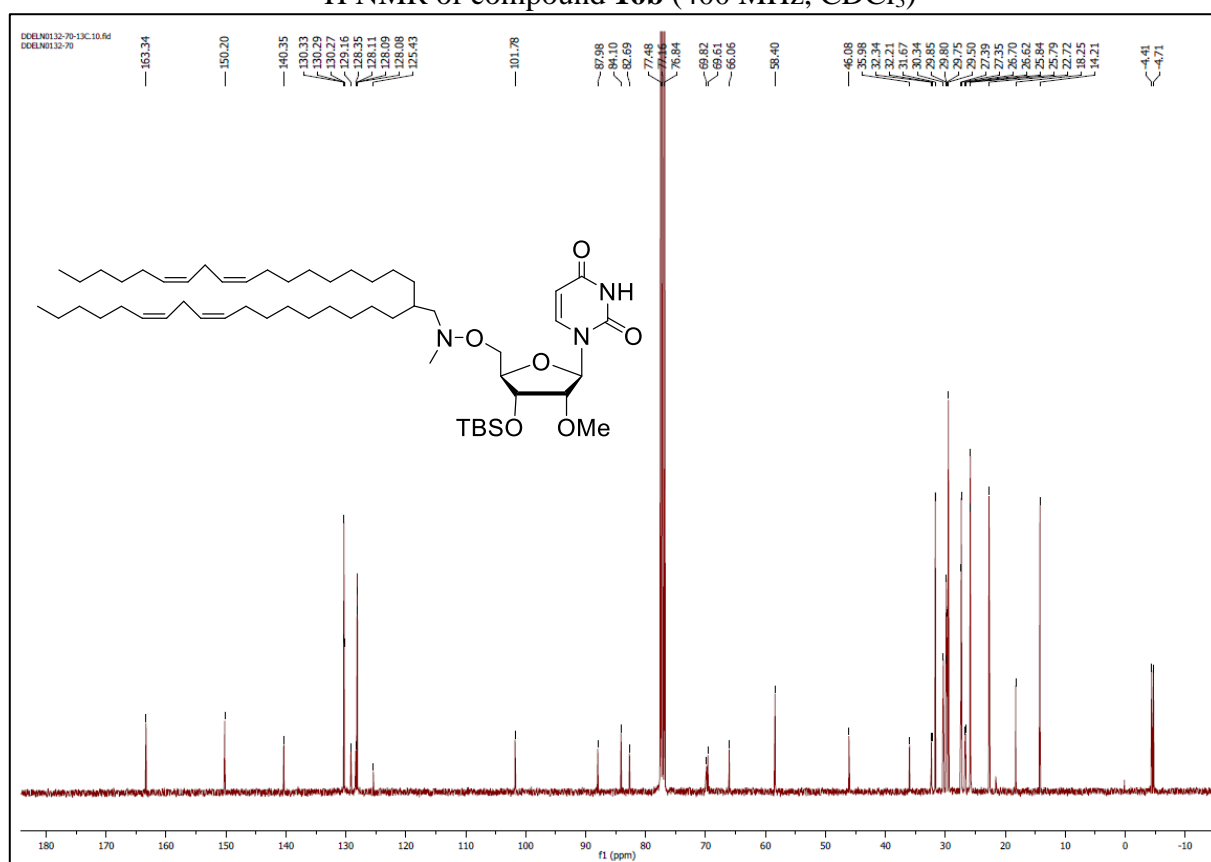

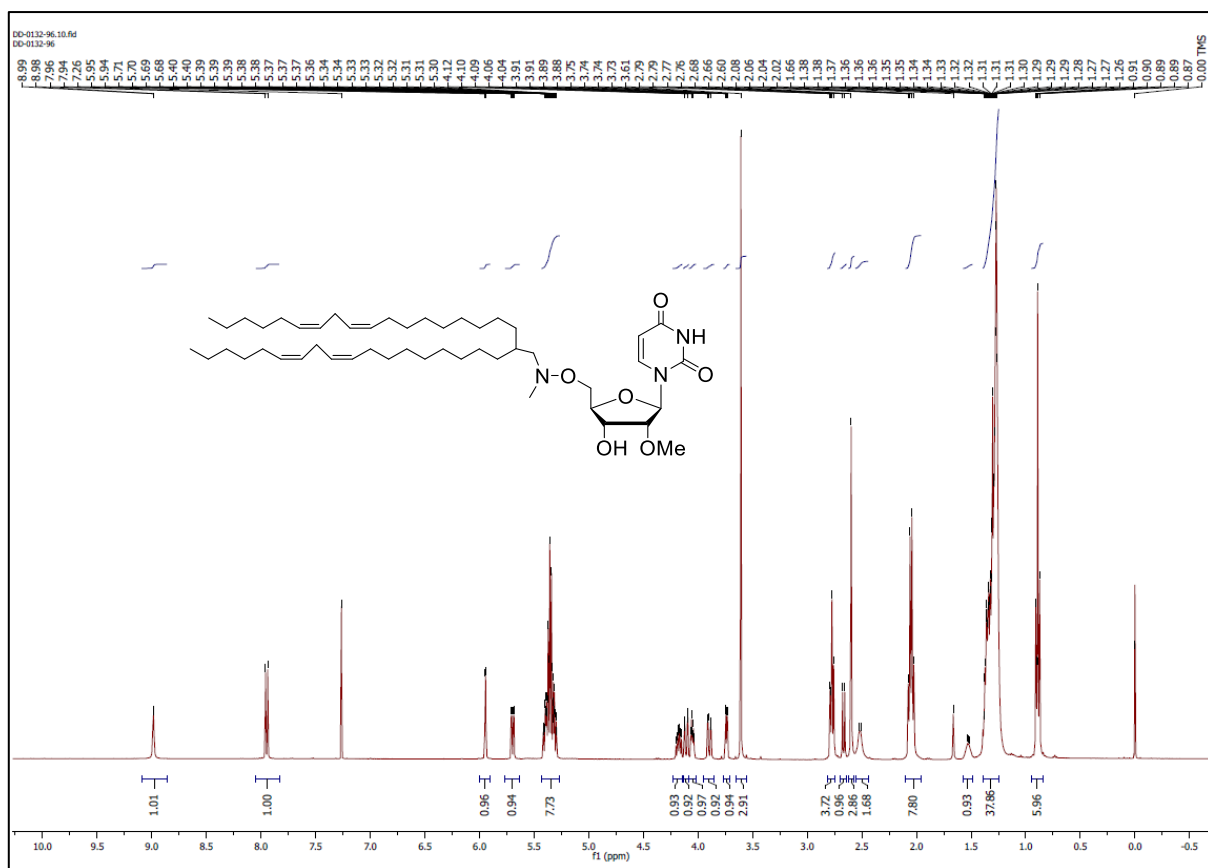

<sup>1</sup>H NMR of compound **17b** (400 MHz, CDCl<sub>3</sub>)

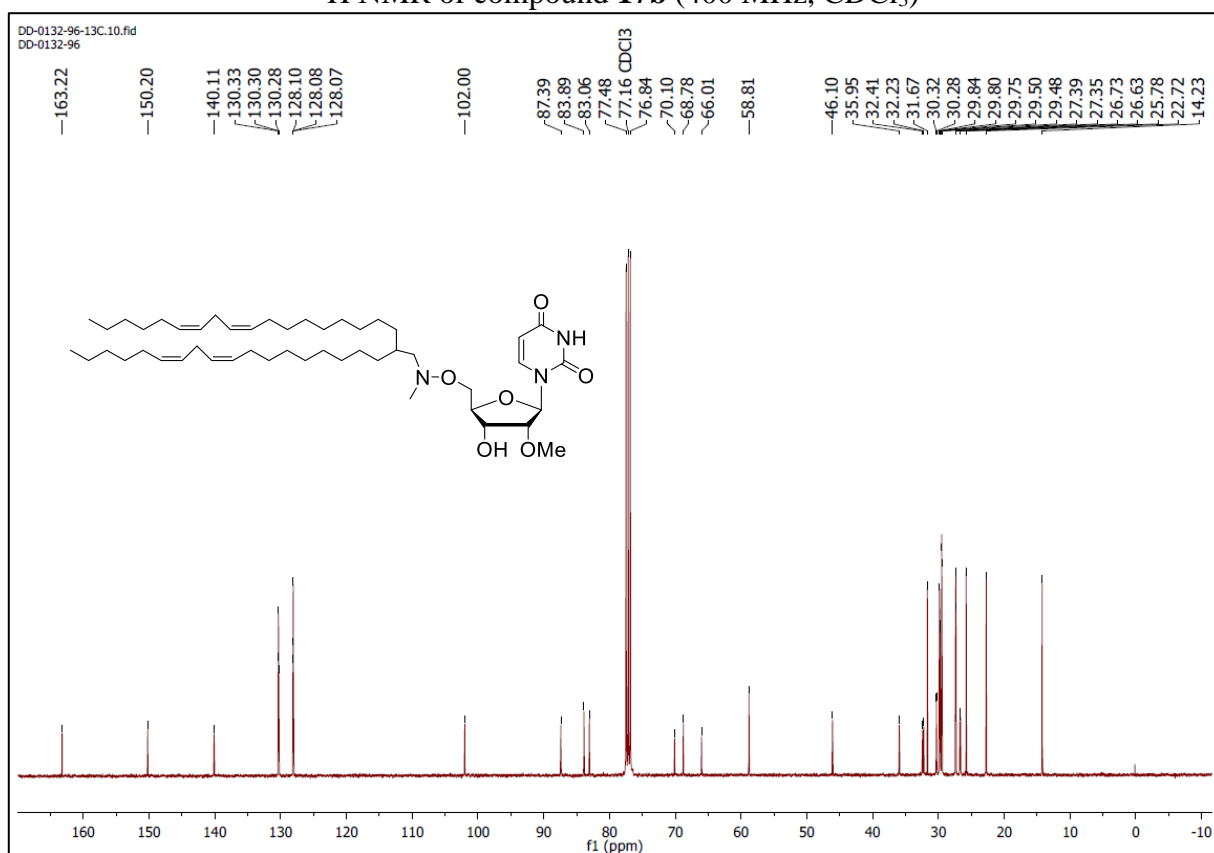

<sup>13</sup>C NMR of compound **17b** (101 MHz, CDCl<sub>3</sub>)

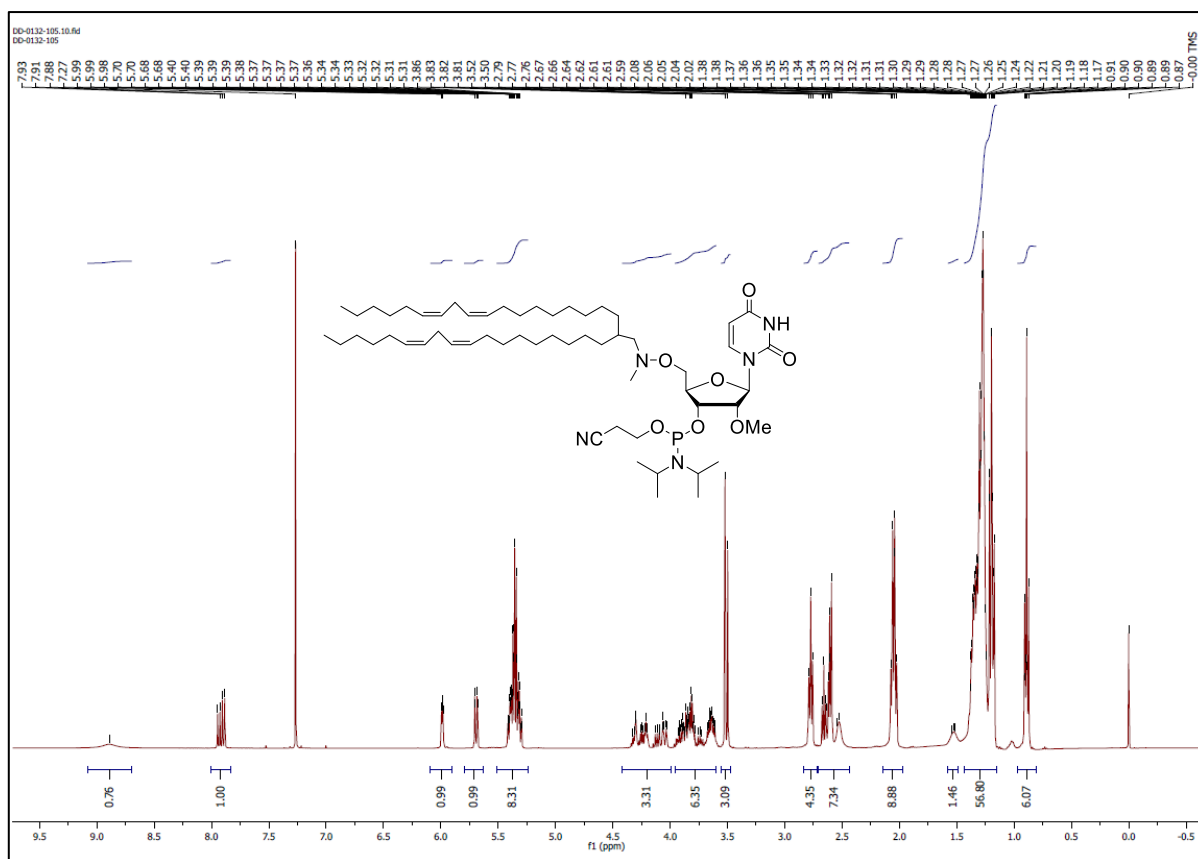

$^1\text{H}$  NMR of compound **18b** (400 MHz,  $\text{CDCl}_3$ )

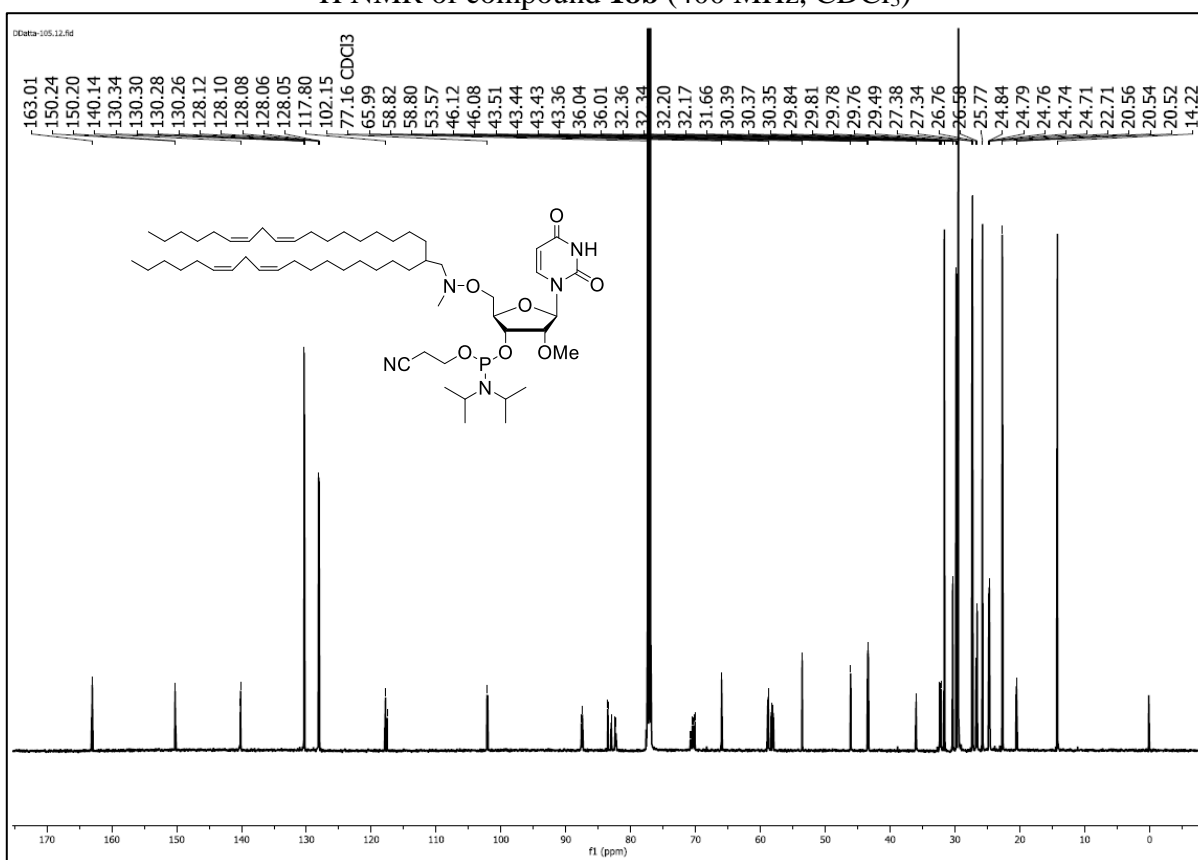

$^{13}\text{C}$  NMR of compound **18b** (151 MHz,  $\text{CDCl}_3$ )

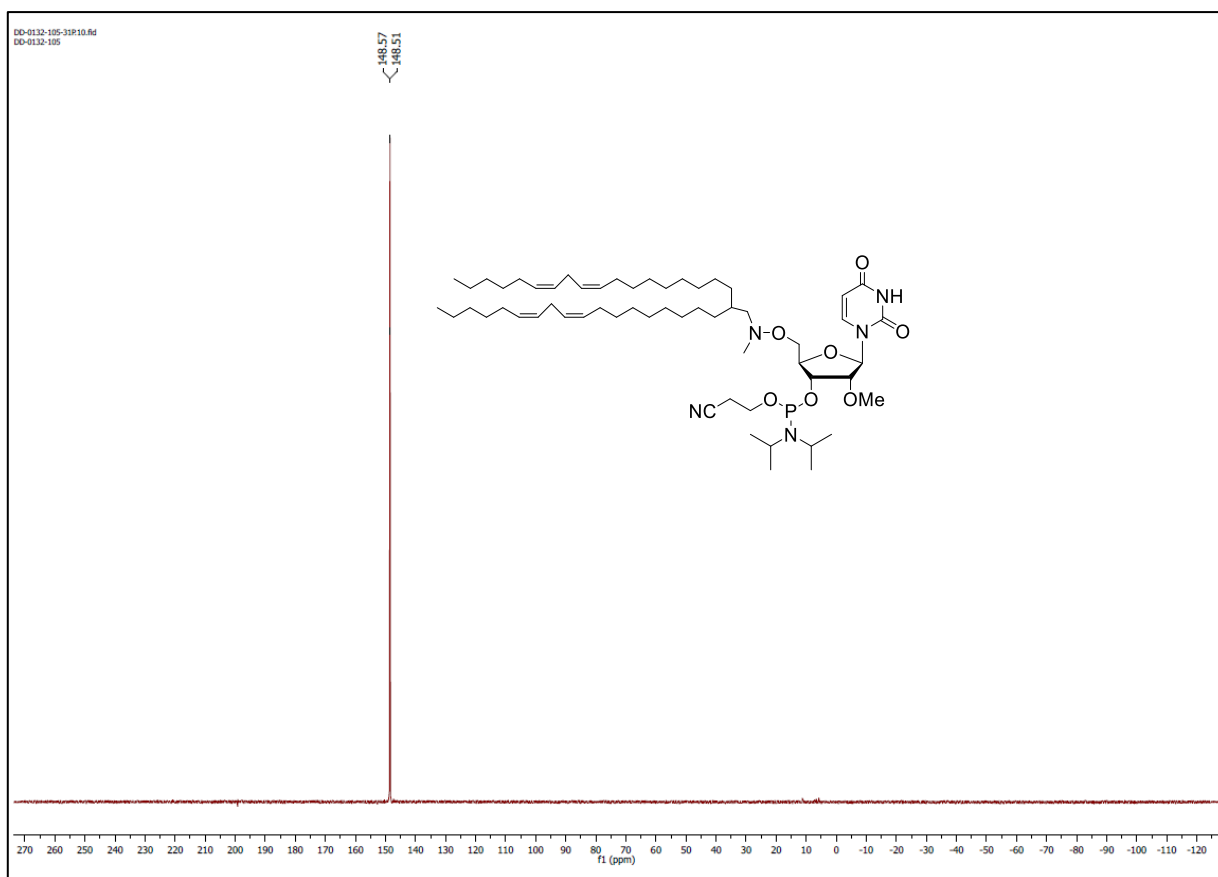

$^{31}\text{P}$  NMR of compound **18b** (162 MHz,  $\text{CDCl}_3$ )

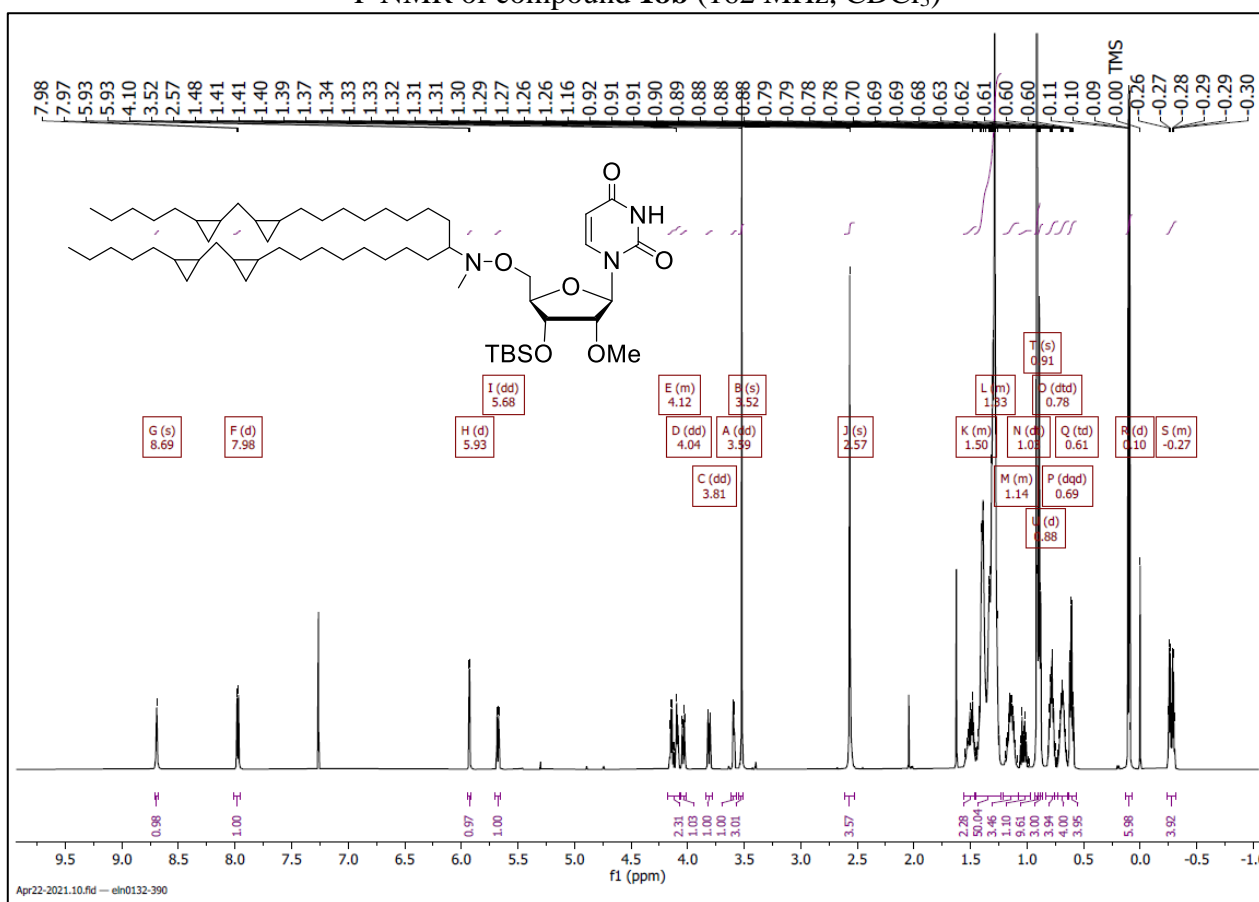

$^1\text{H}$  NMR of compound **16c** (600 MHz,  $\text{CDCl}_3$ )

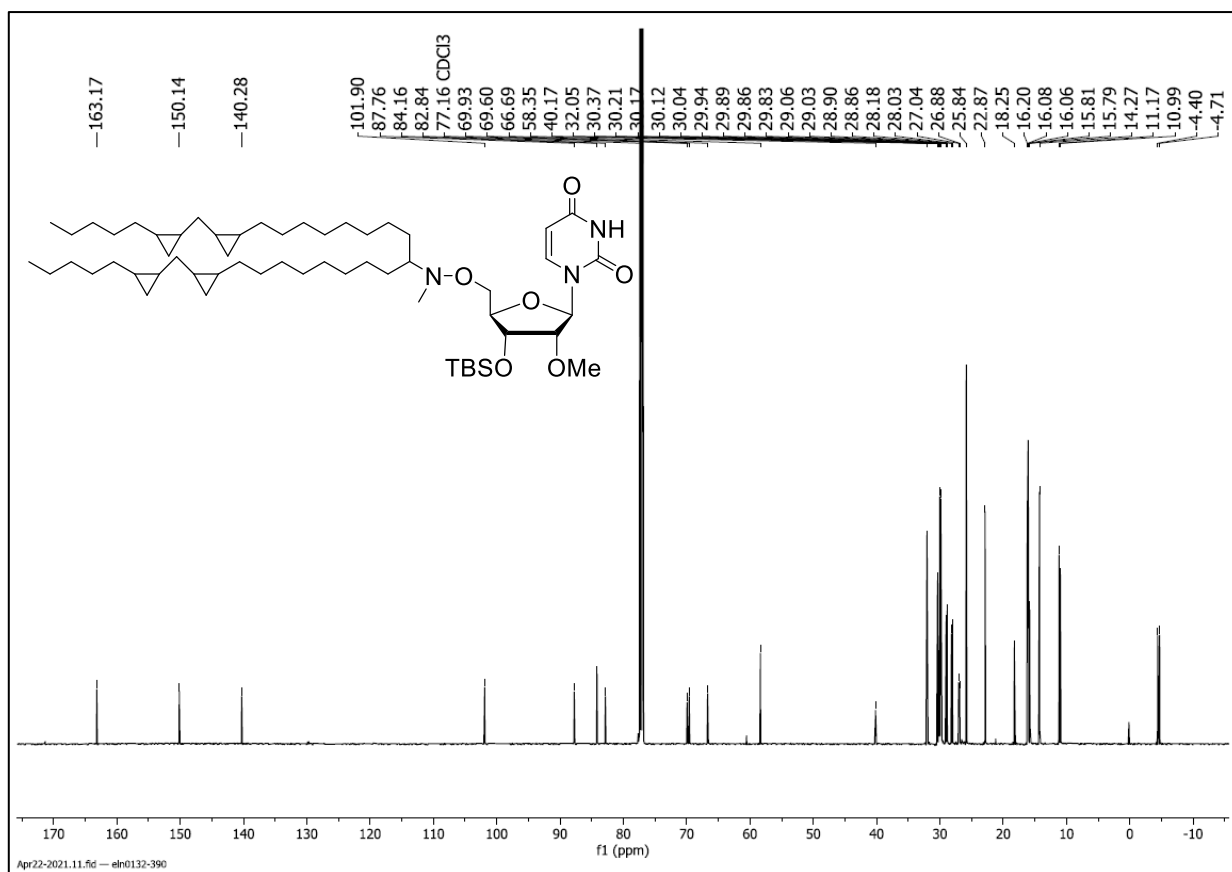

<sup>13</sup>C NMR of compound 16c (151 MHz, CDCl<sub>3</sub>)

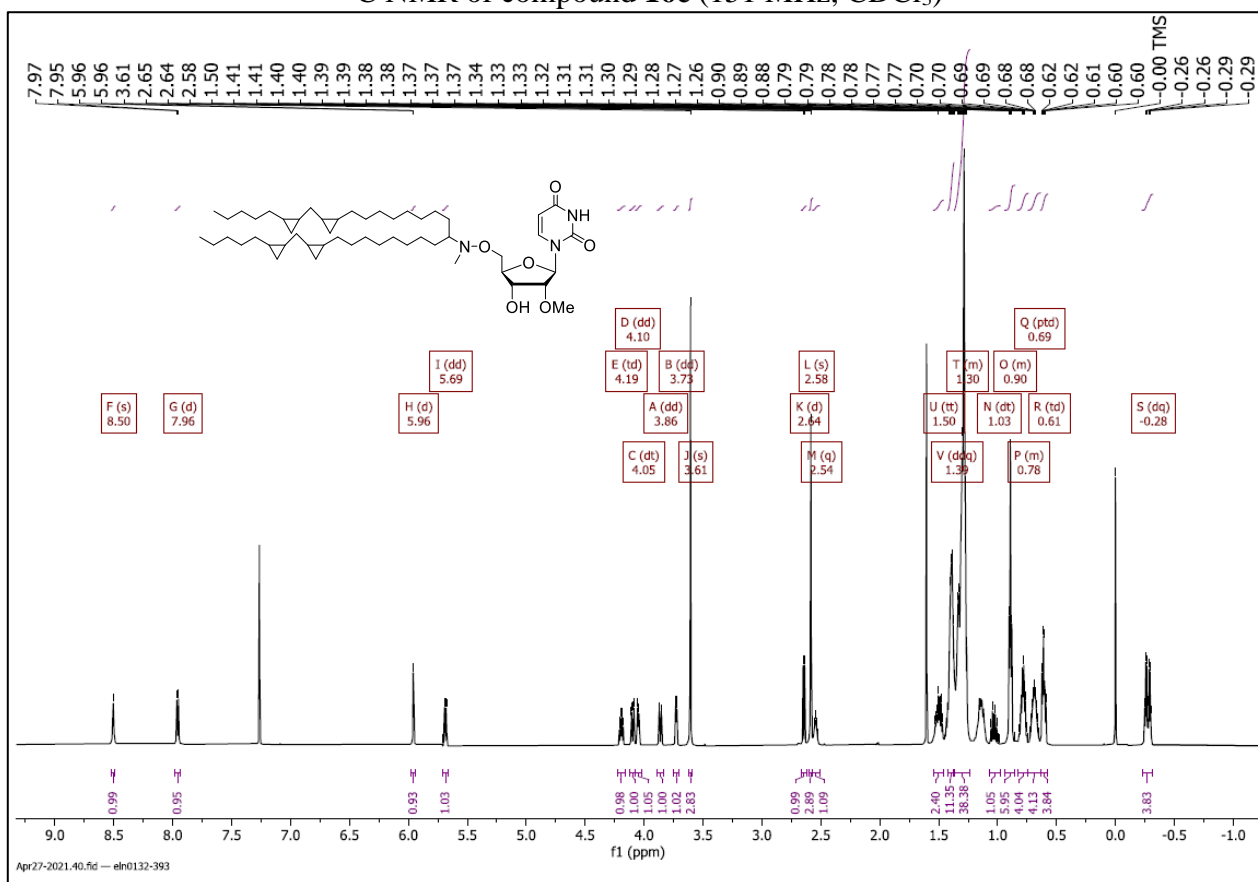

<sup>1</sup>H NMR of compound 17c (600 MHz, CDCl<sub>3</sub>)

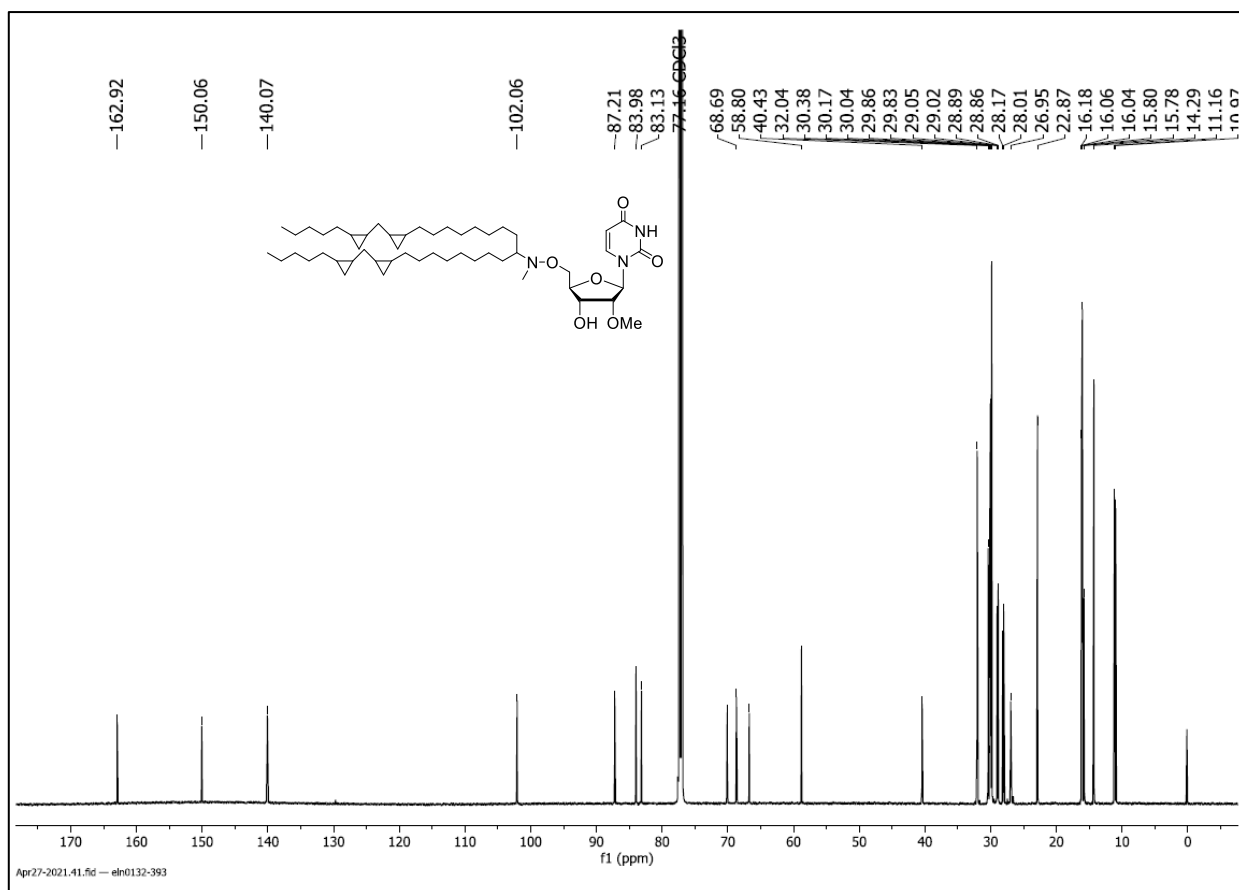

<sup>13</sup>C NMR of compound 17c (151 MHz, CDCl<sub>3</sub>)

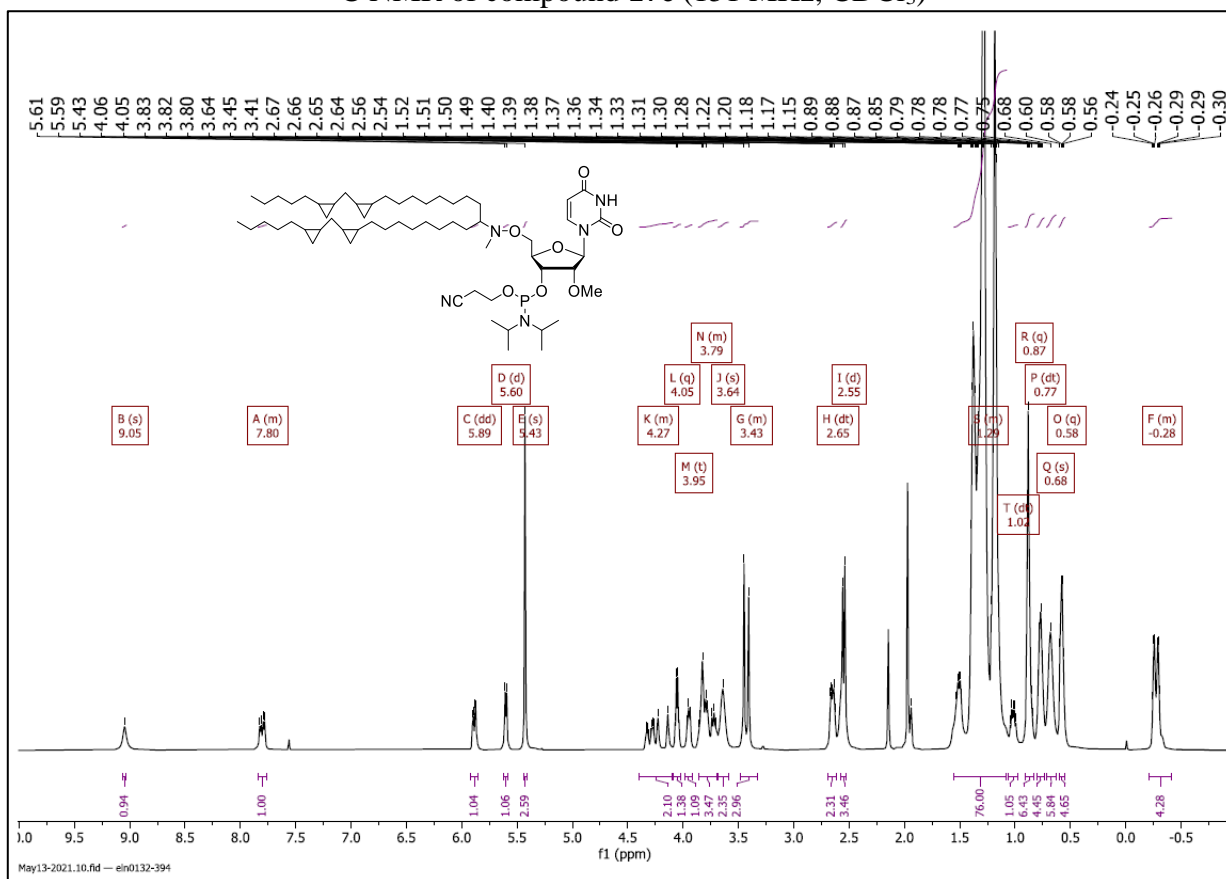

<sup>1</sup>H NMR of compound 18c (600 MHz, CD<sub>3</sub>CN)

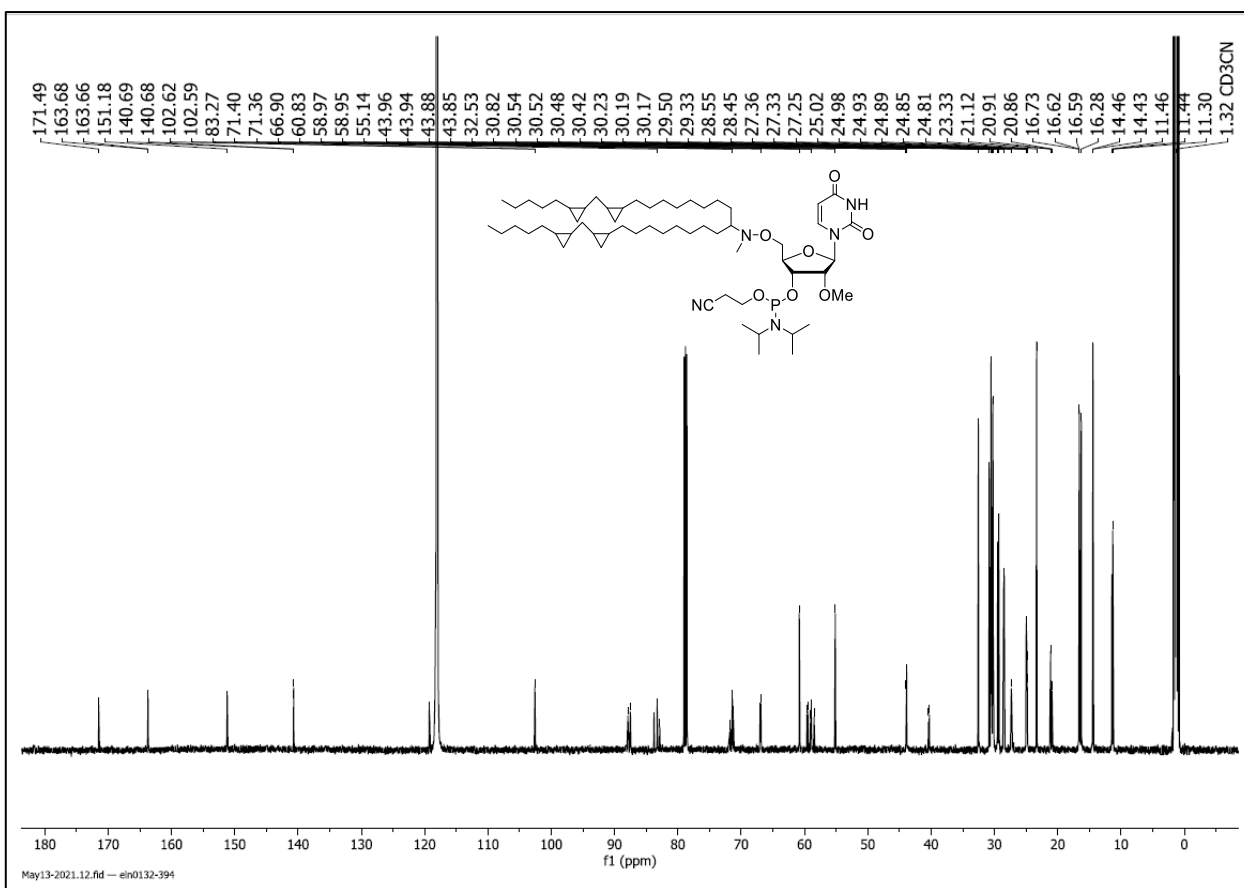

<sup>13</sup>C NMR of compound **18c** (151 MHz, CD<sub>3</sub>CN)

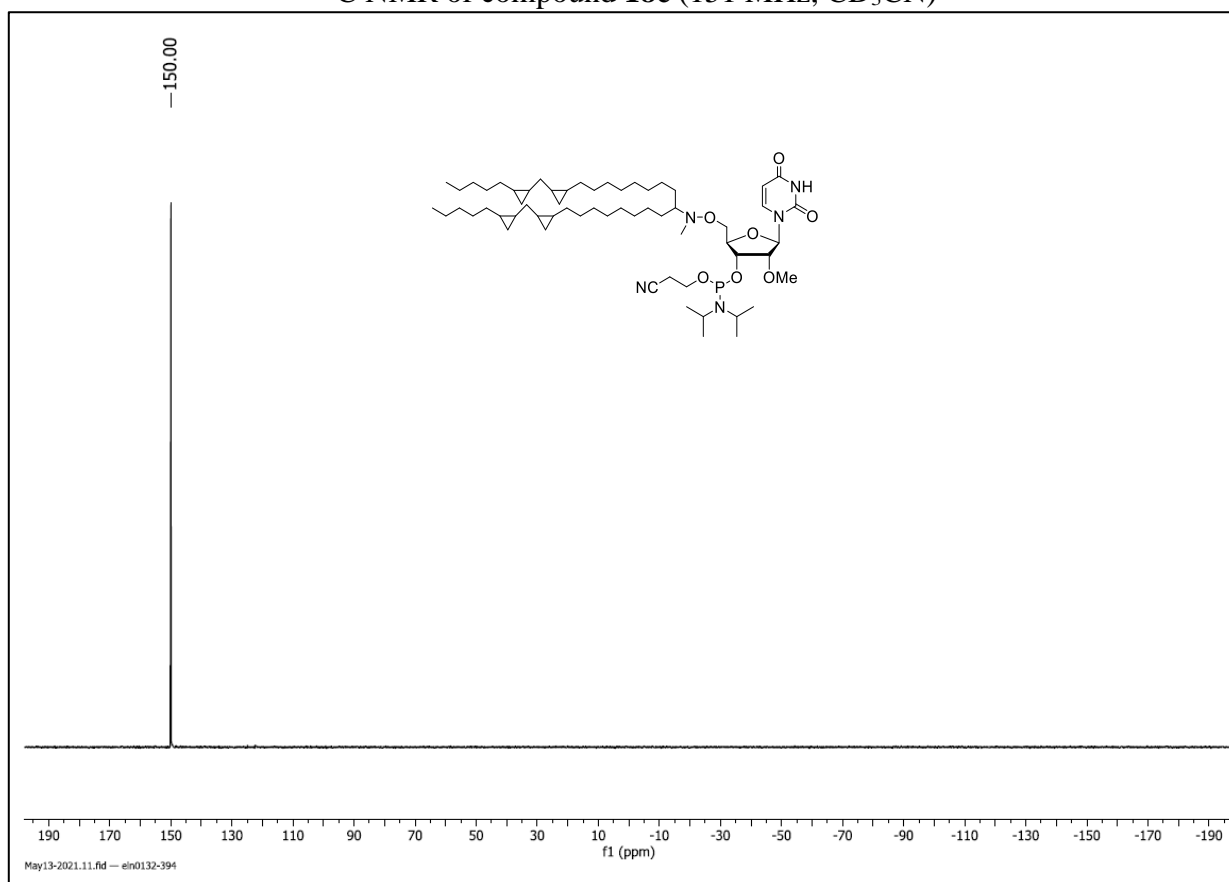

<sup>31</sup>P NMR of compound **18c** (243 MHz, CD<sub>3</sub>CN)

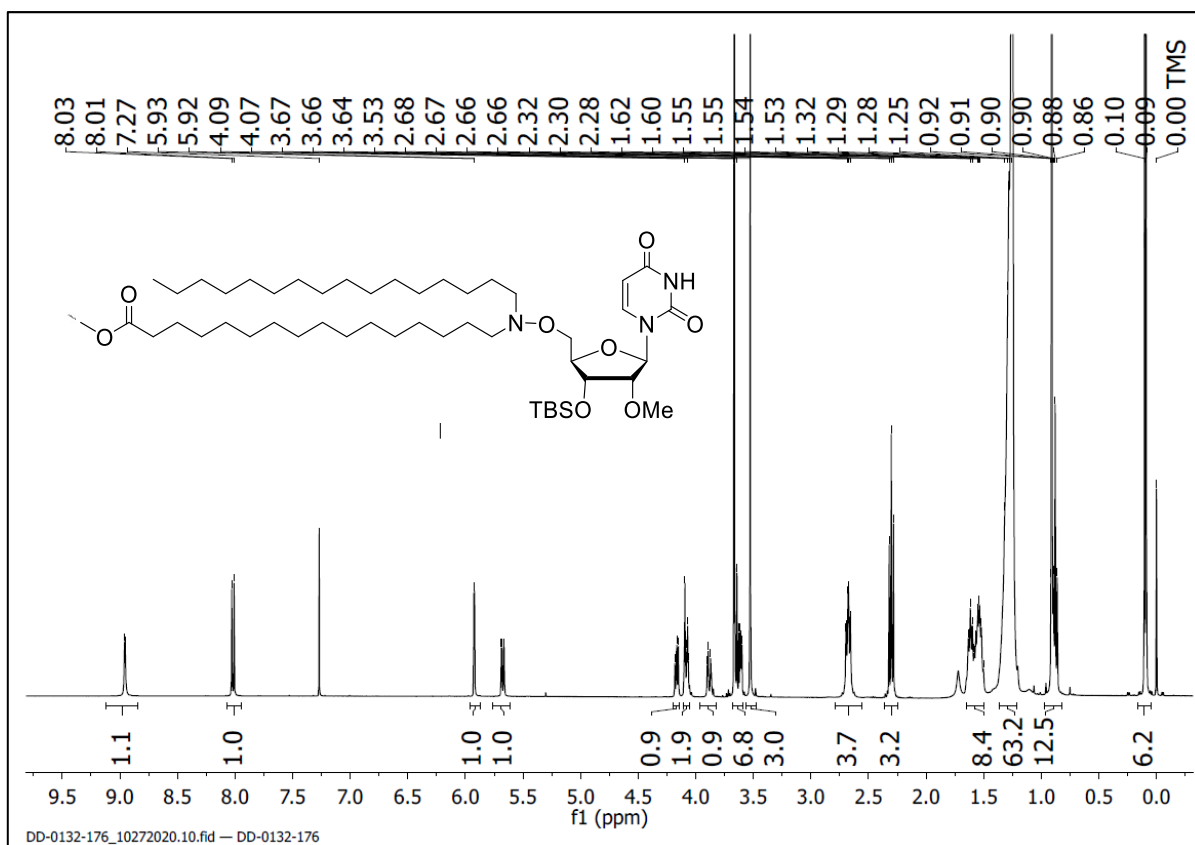

$^1\text{H}$  NMR of compound **16d** (400 MHz,  $\text{CDCl}_3$ )

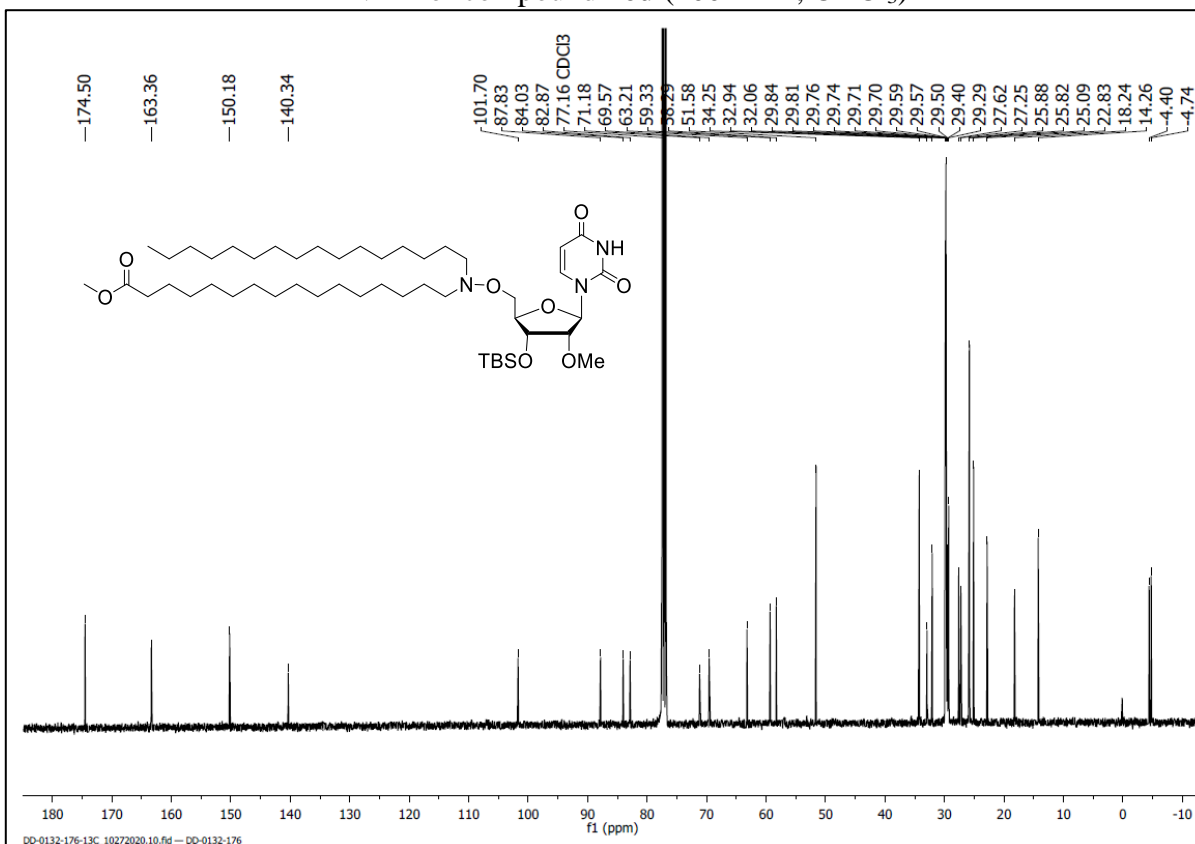

$^{13}\text{C}$  NMR of compound **16d** (101 MHz,  $\text{CDCl}_3$ )



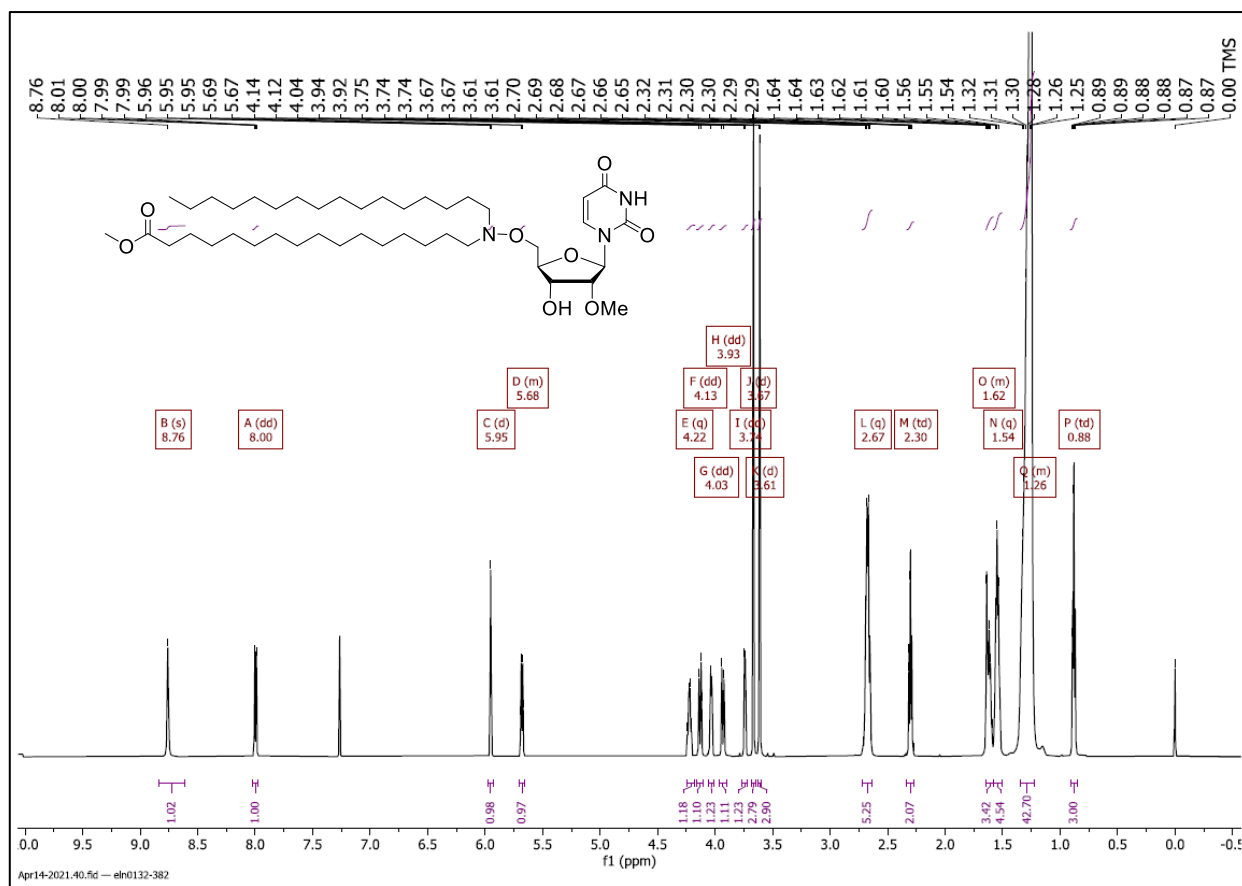

**<sup>1</sup>H NMR of compound 17d (600 MHz, CDCl<sub>3</sub>)**

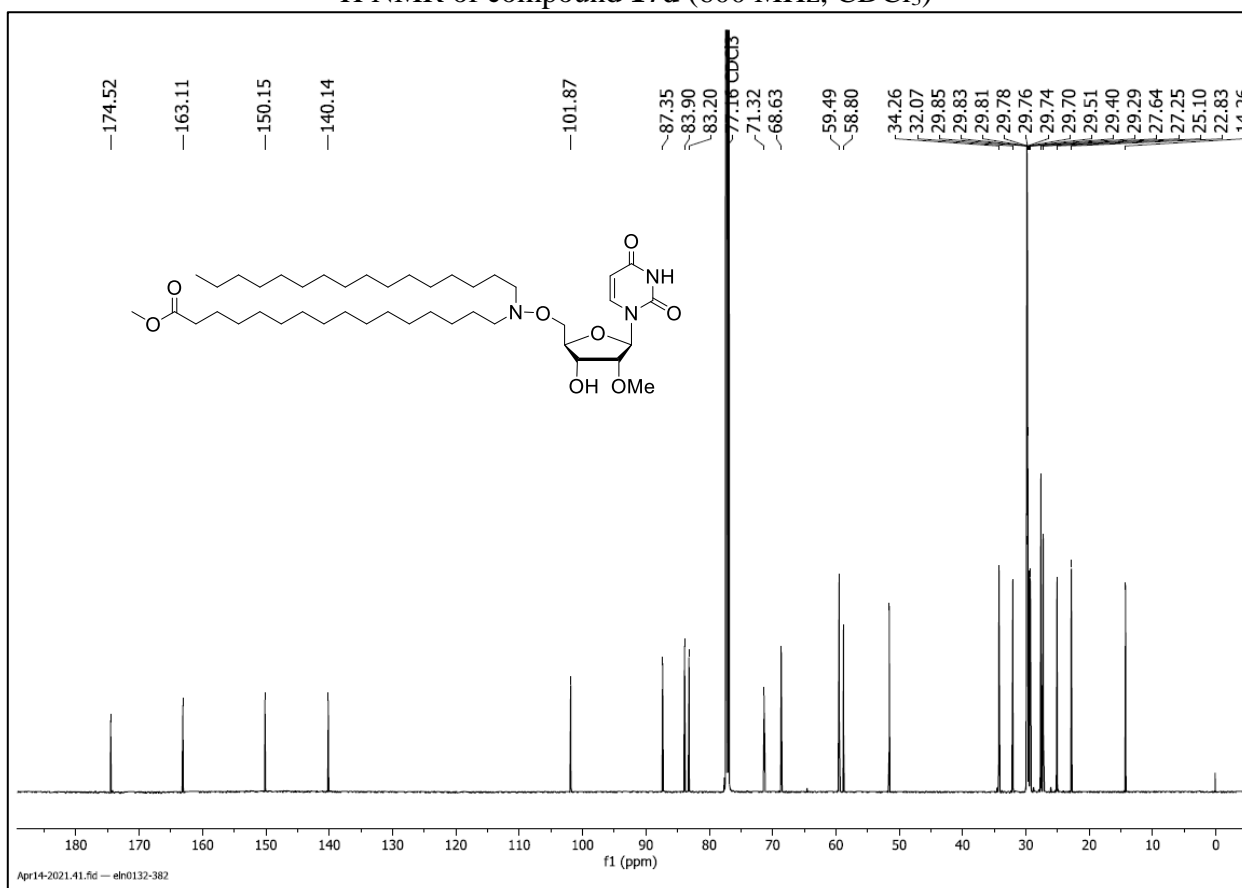

**<sup>13</sup>C NMR of compound 17d (151 MHz, CDCl<sub>3</sub>)**

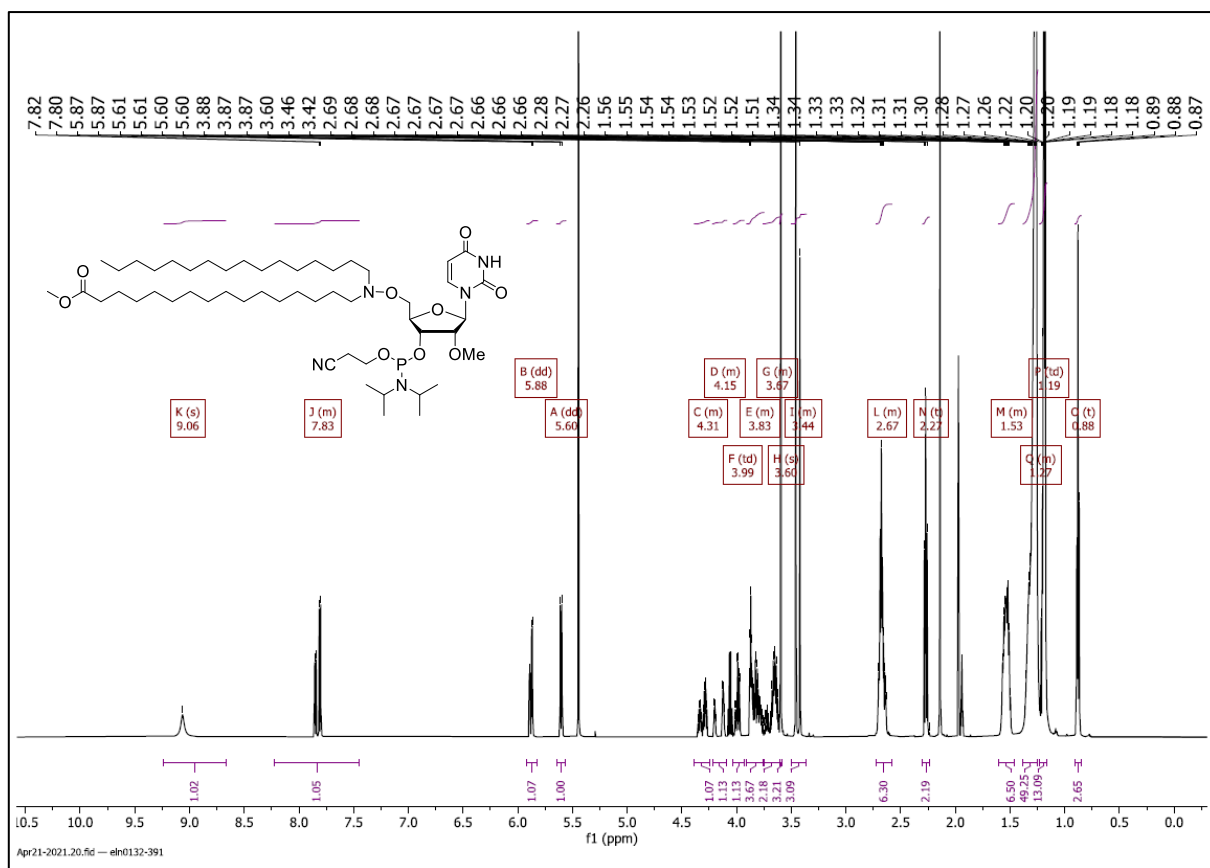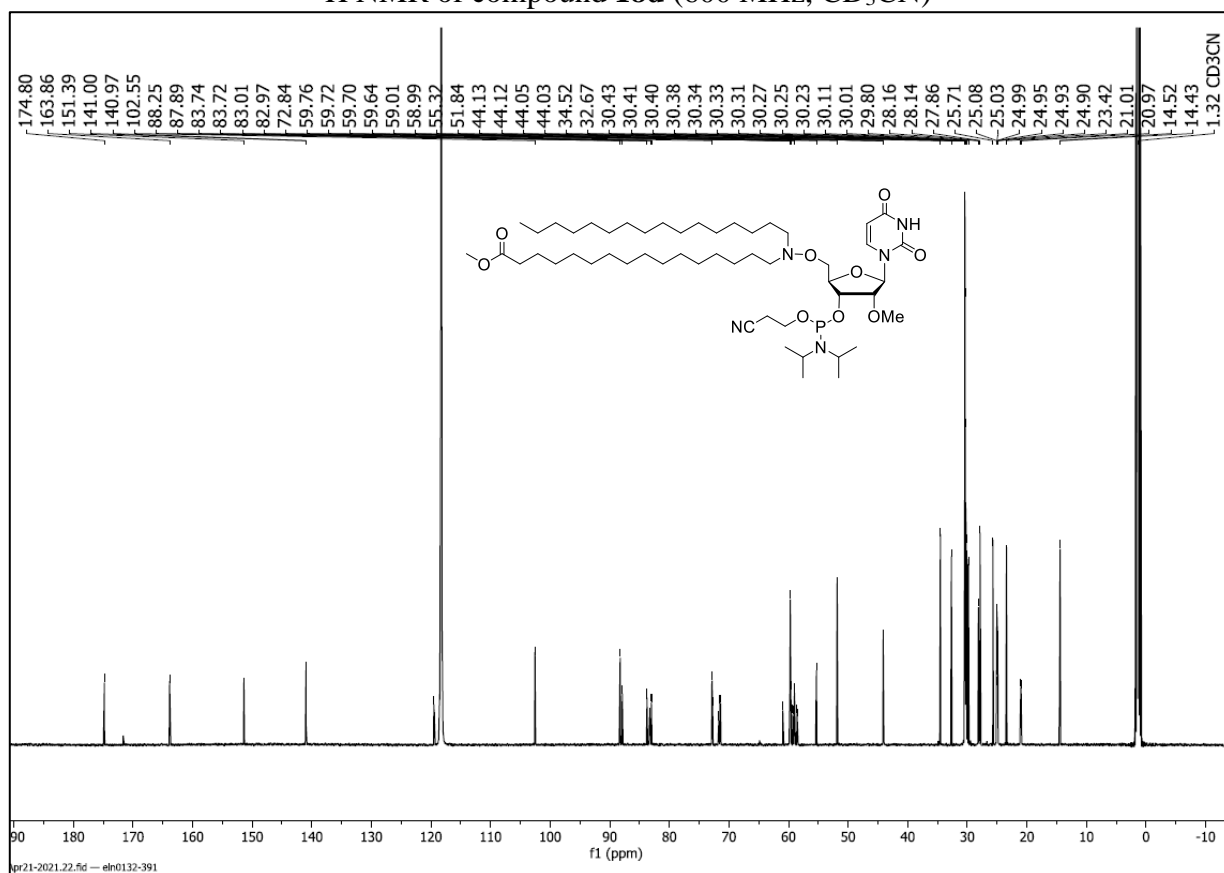

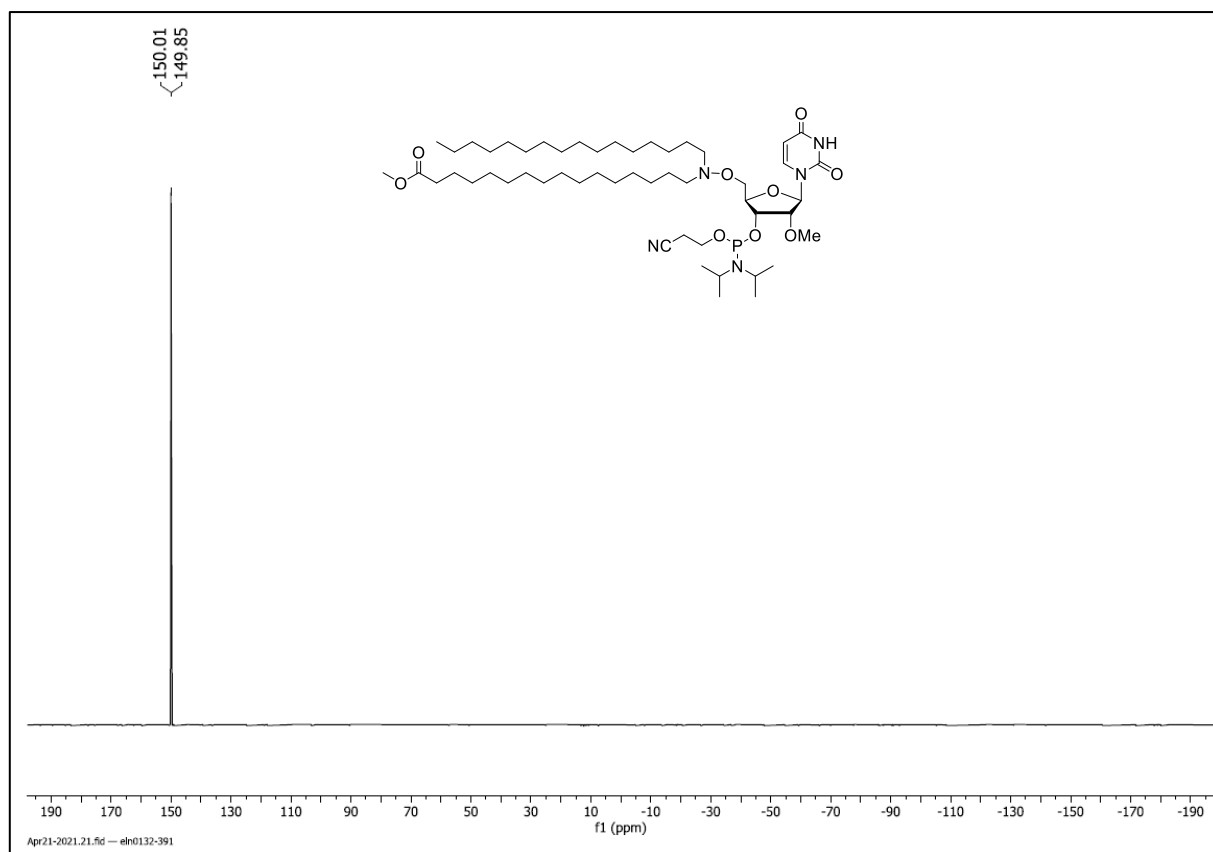

<sup>31</sup>P NMR of compound **18d** (243 MHz, CD<sub>3</sub>CN)

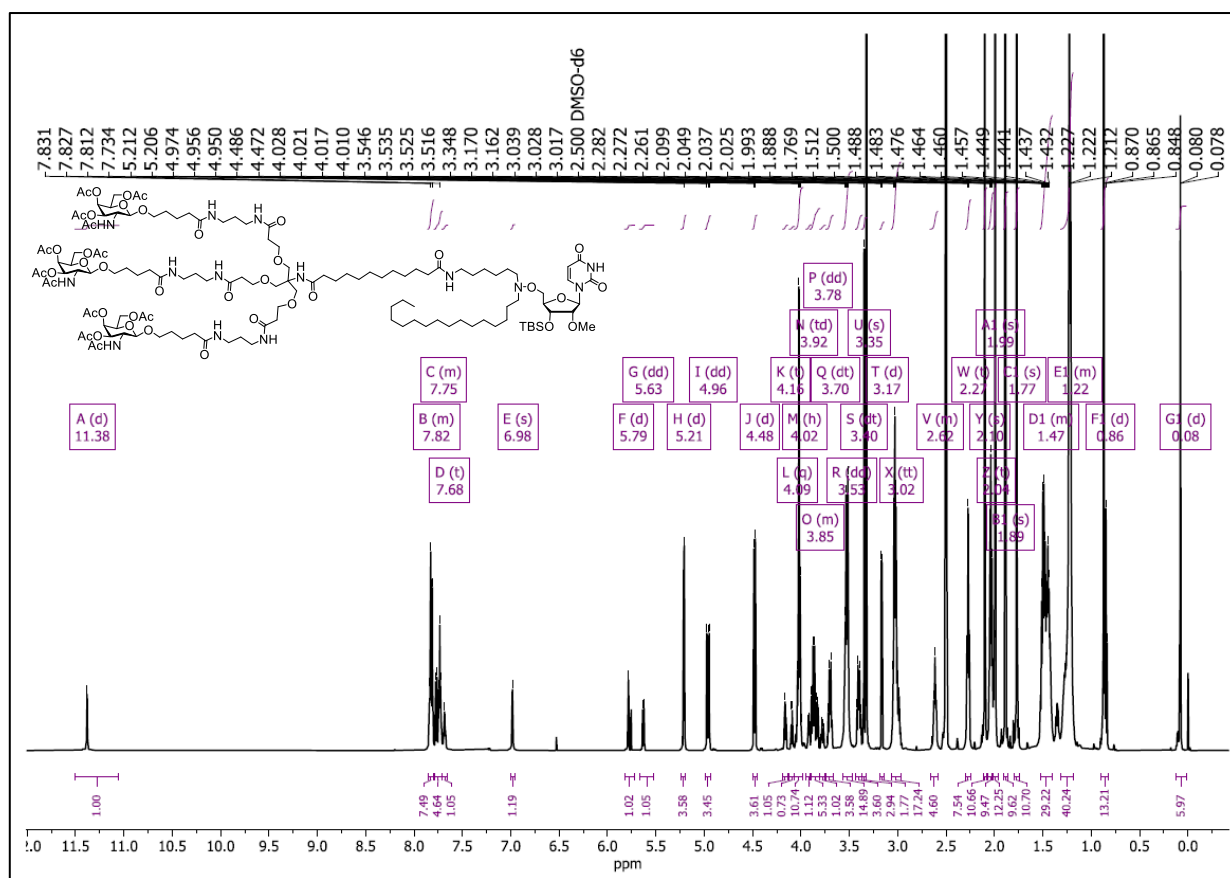

<sup>1</sup>H NMR of compound **16e** (600 MHz, DMSO-*d*<sub>6</sub>)

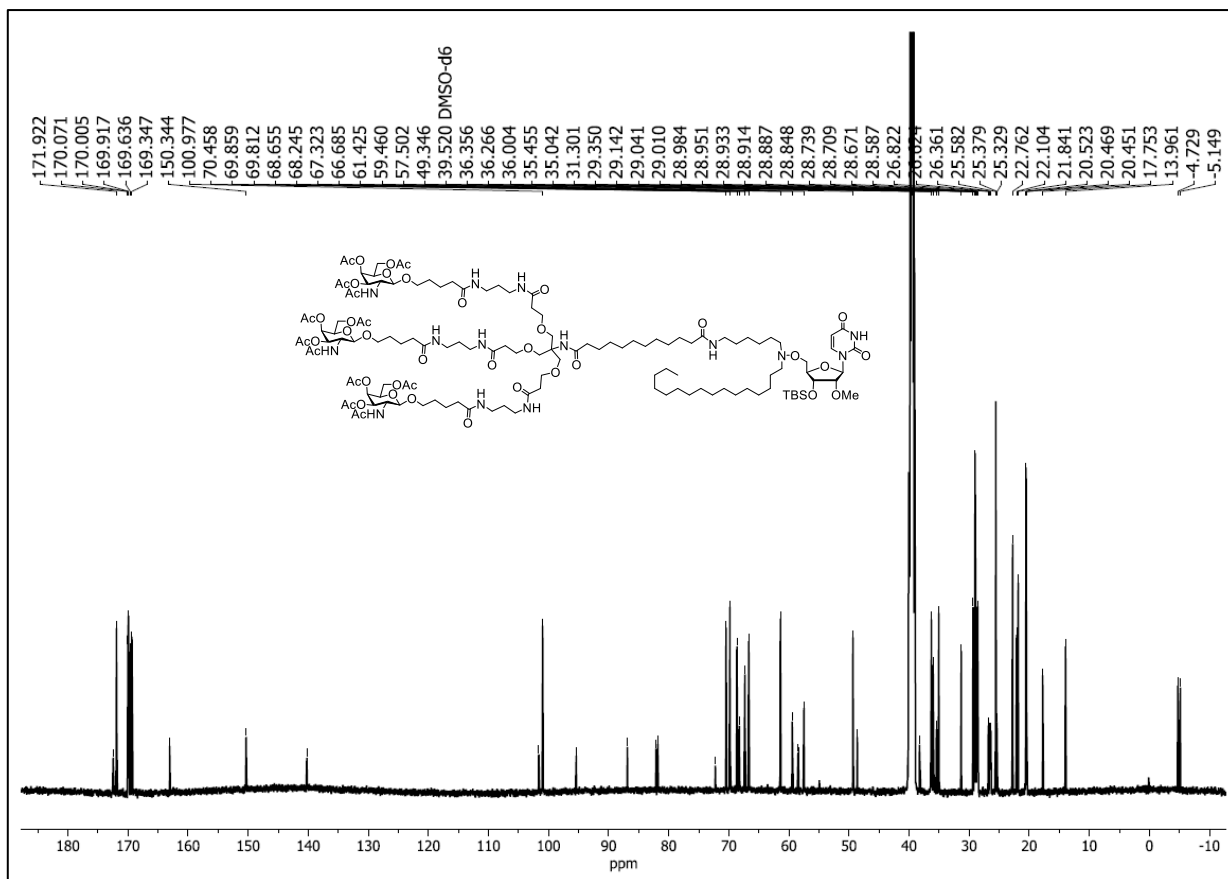

<sup>13</sup>C NMR of compound **16e** (151 MHz, DMSO-*d*<sub>6</sub>)

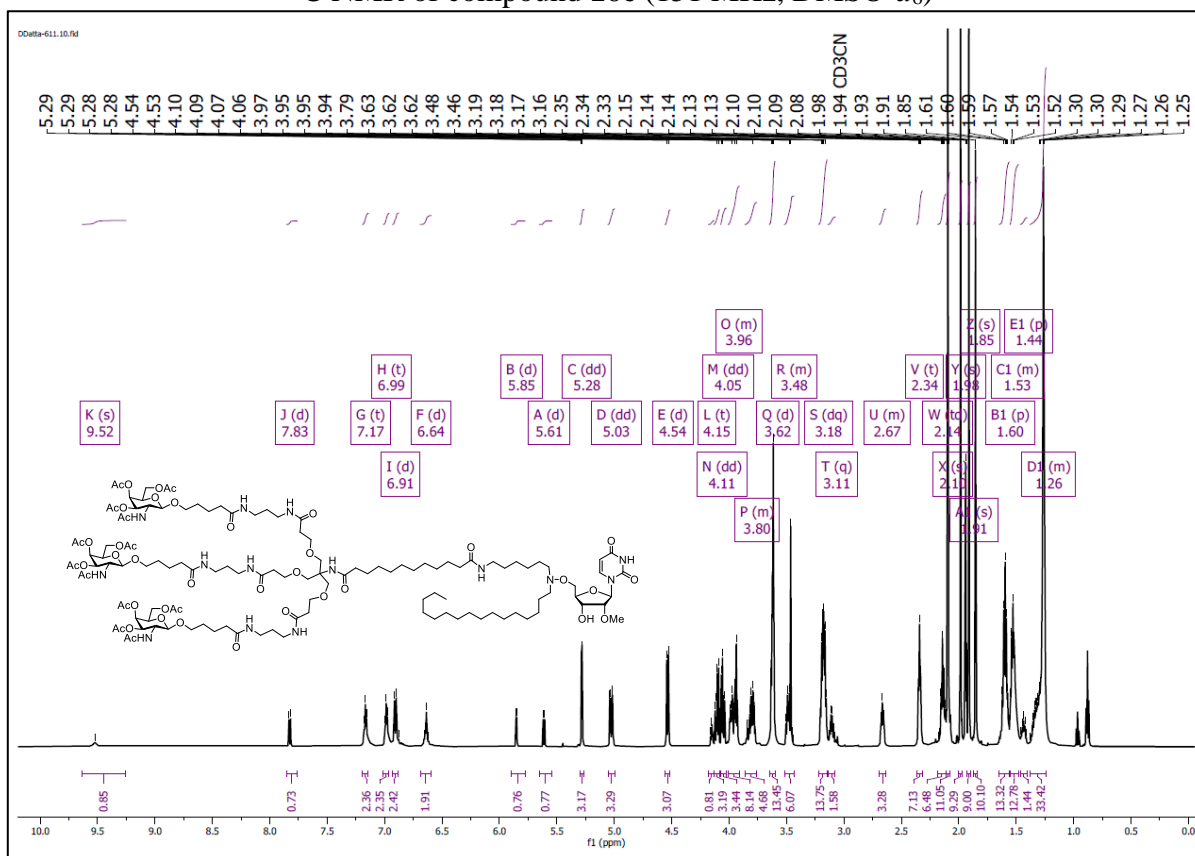

<sup>1</sup>H NMR of compound **17e** (600 MHz, CD<sub>3</sub>CN)

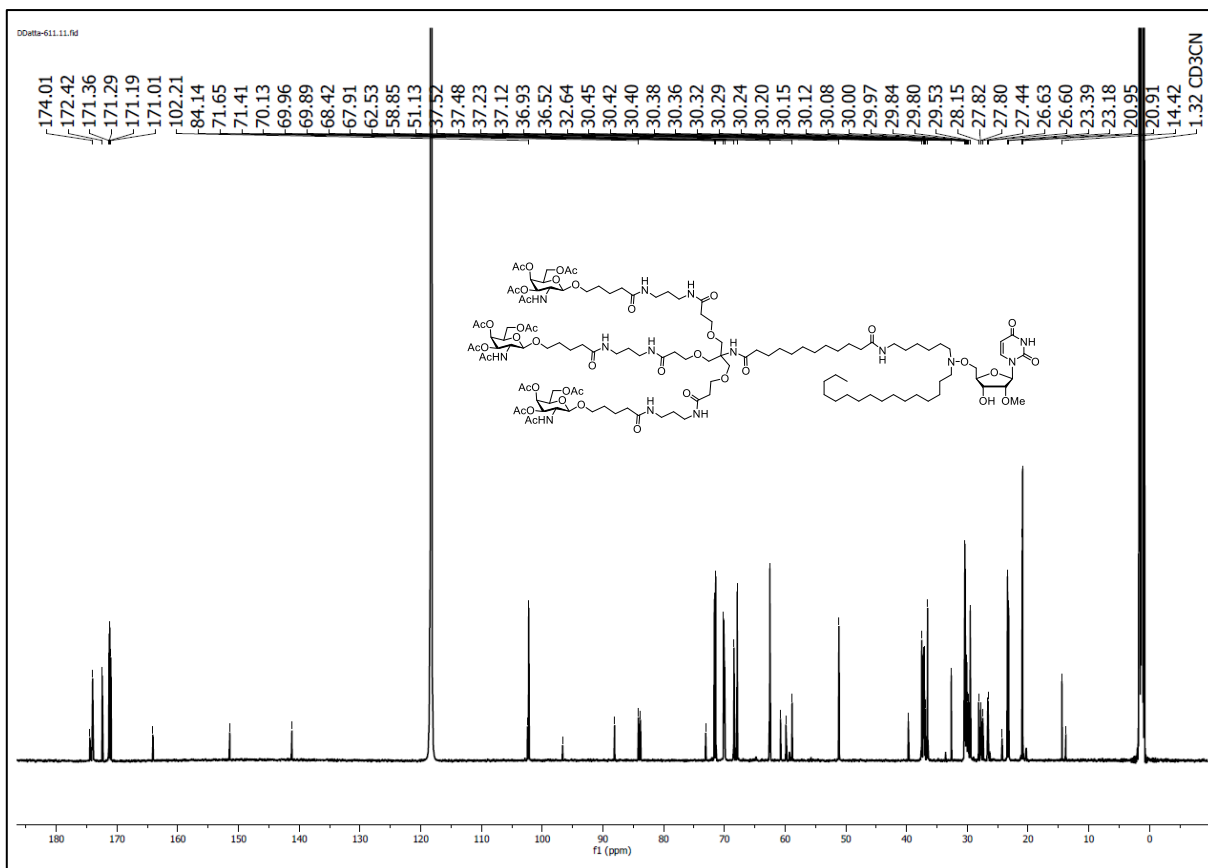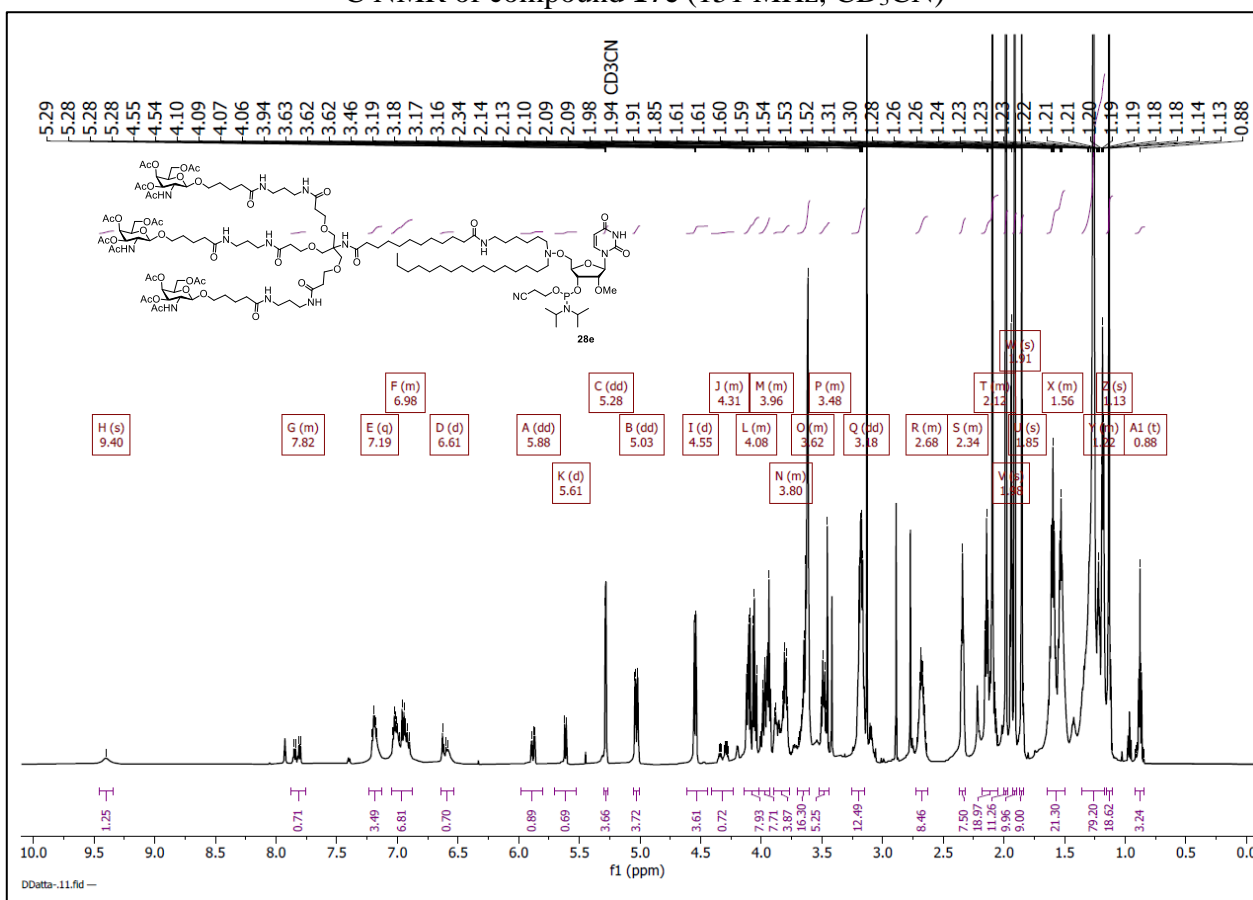

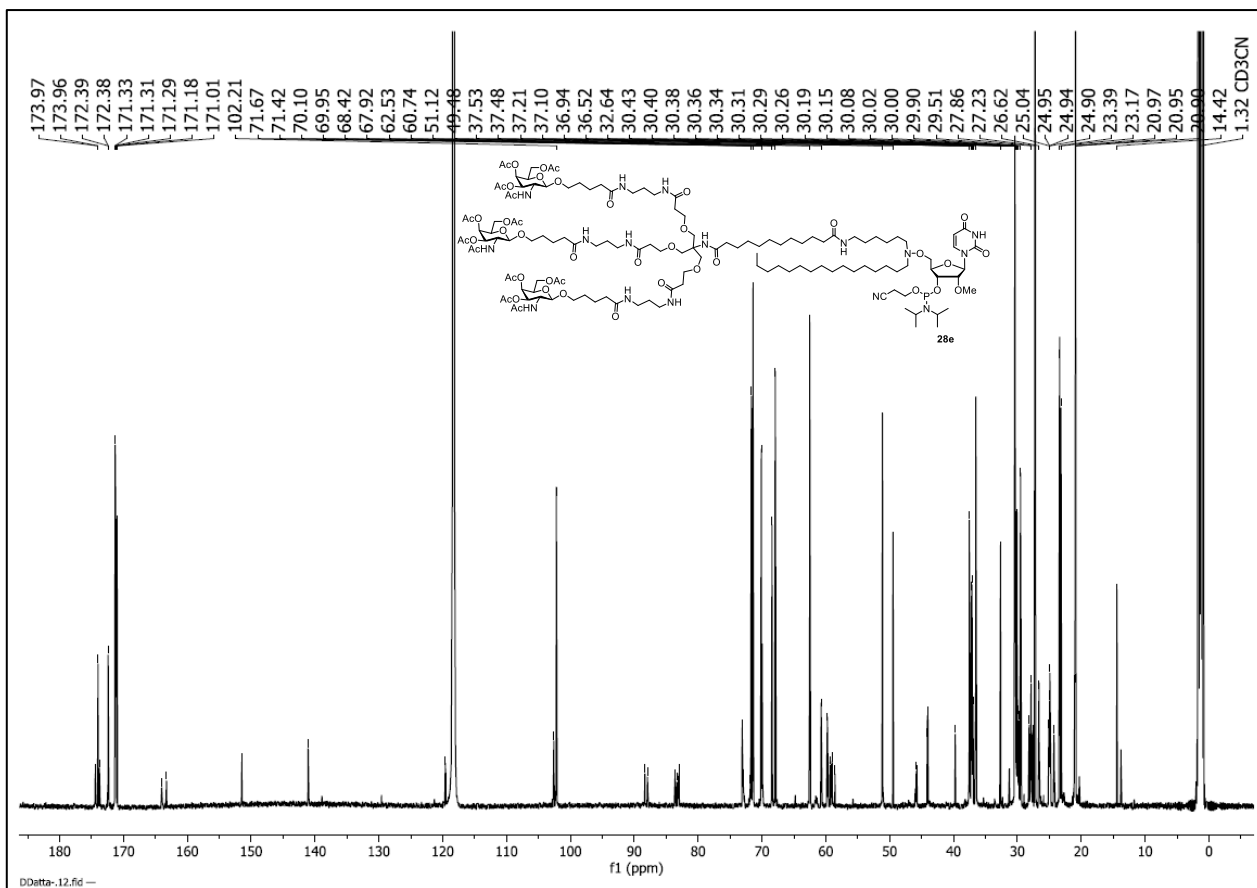

<sup>13</sup>C NMR of compound **18e** (151 MHz, CD<sub>3</sub>CN)

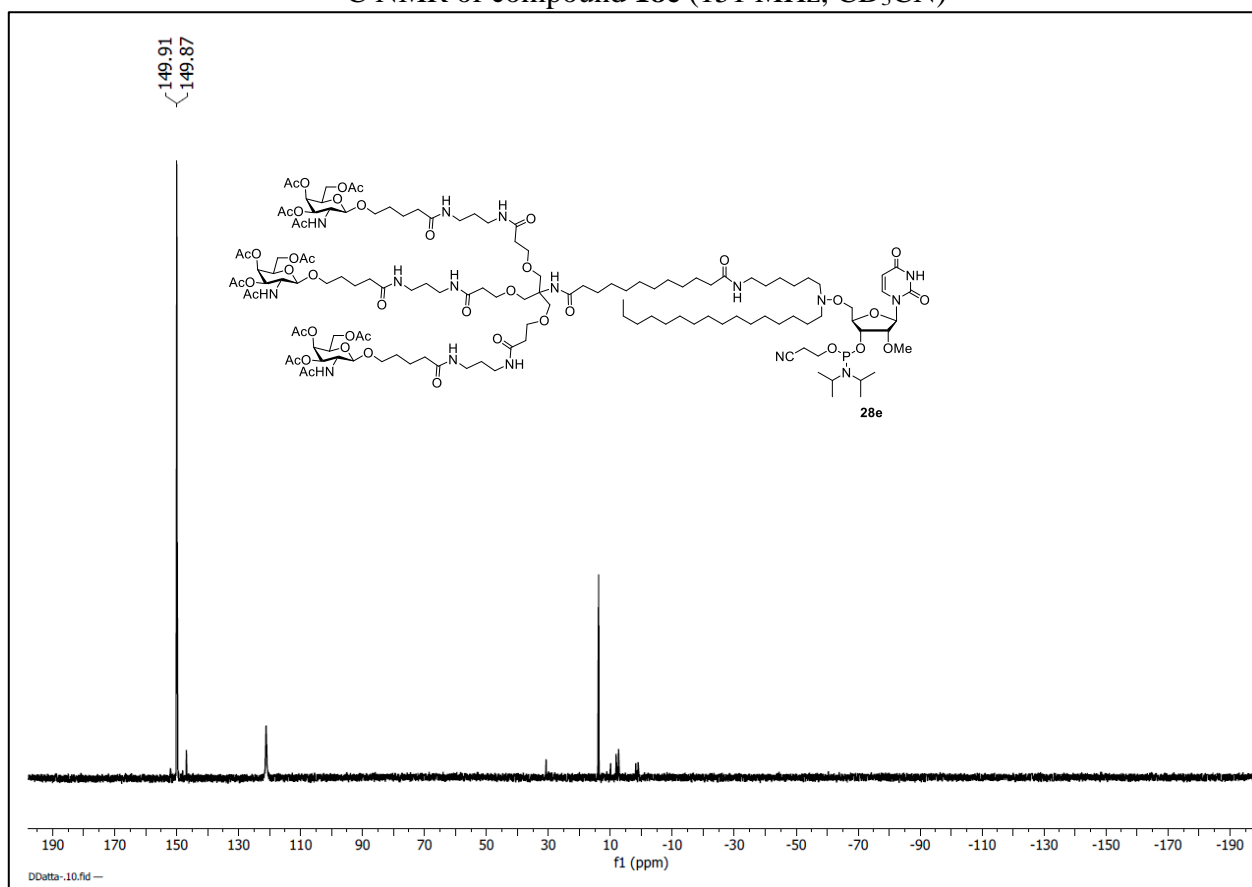

<sup>31</sup>P NMR of compound **18e** (243 MHz, CD<sub>3</sub>CN)

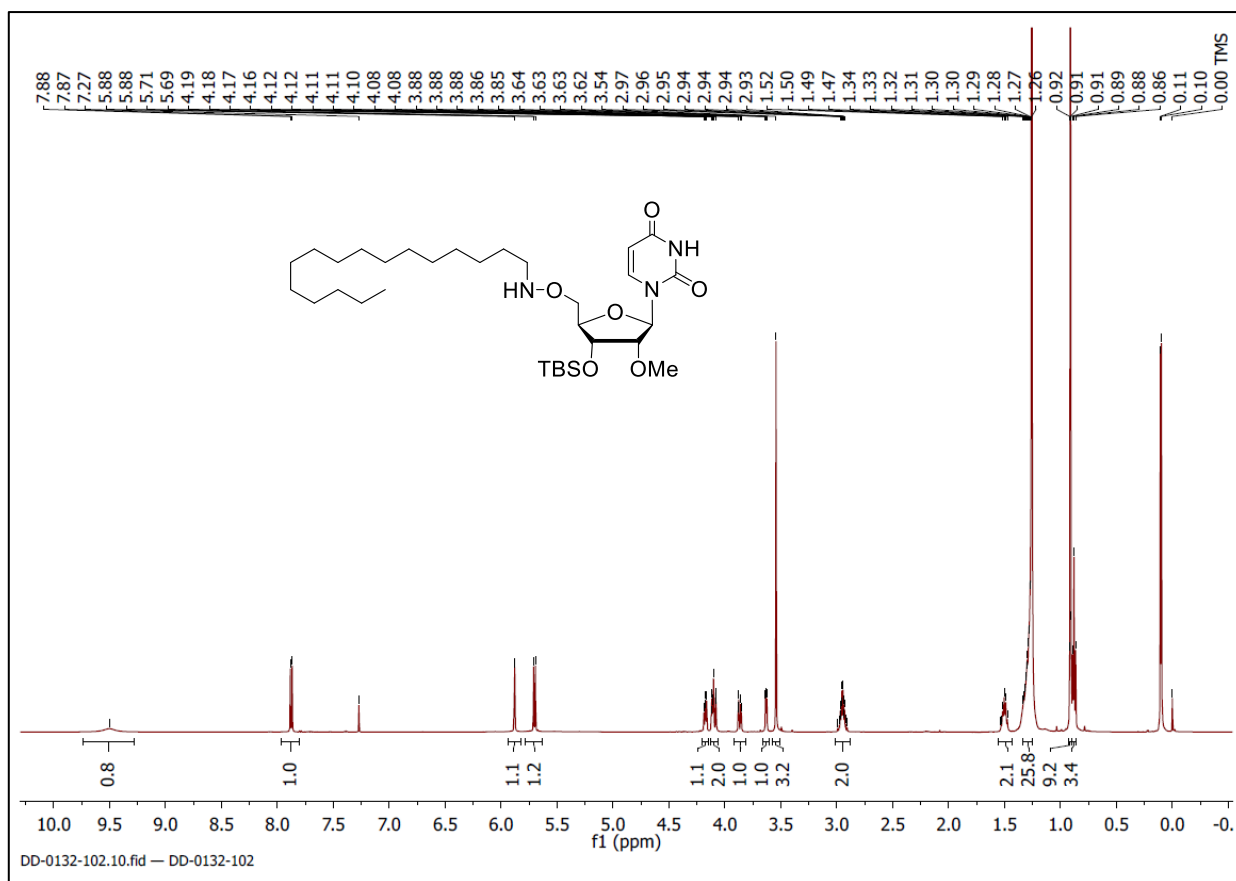

<sup>1</sup>H NMR of compound **19** (500 MHz, CDCl<sub>3</sub>)

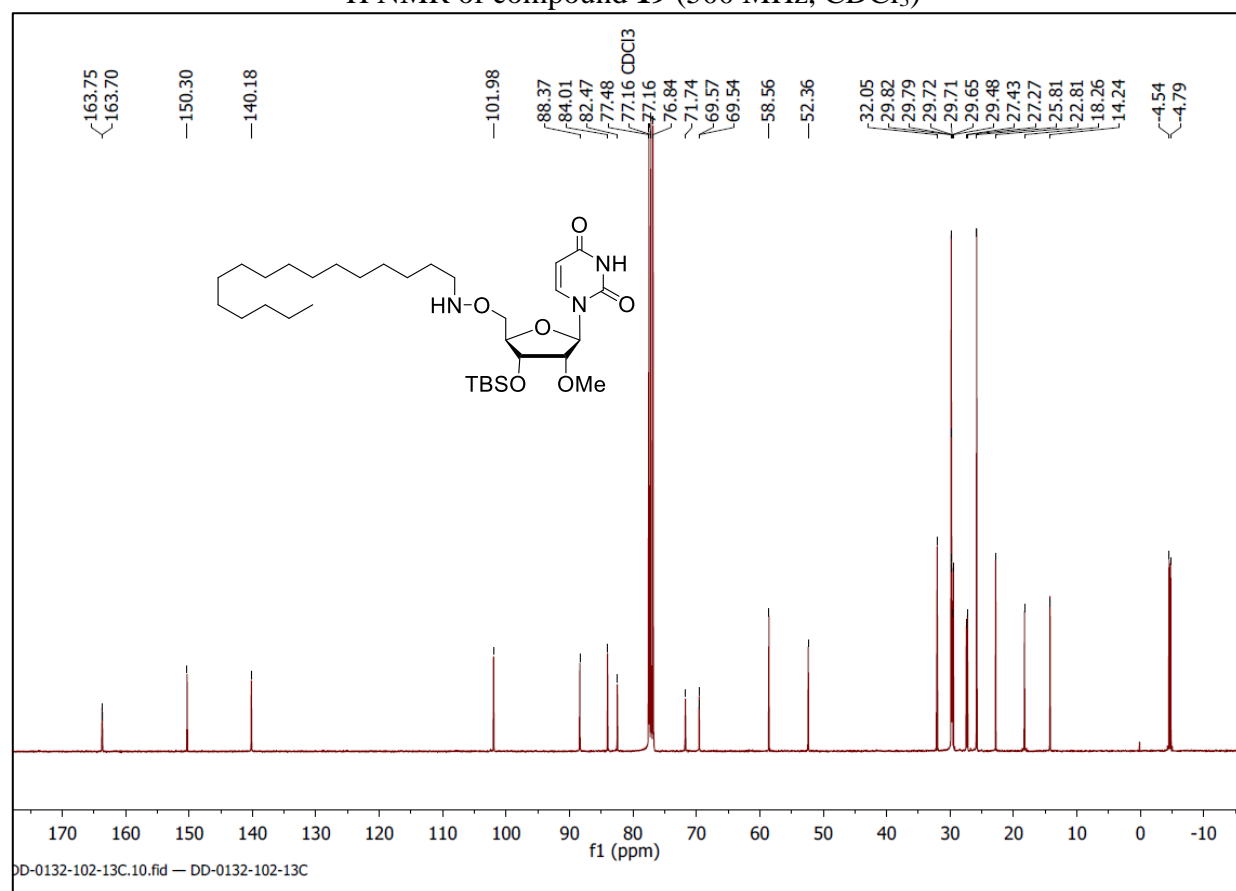

<sup>13</sup>C NMR of compound **19** (101 MHz, CDCl<sub>3</sub>)

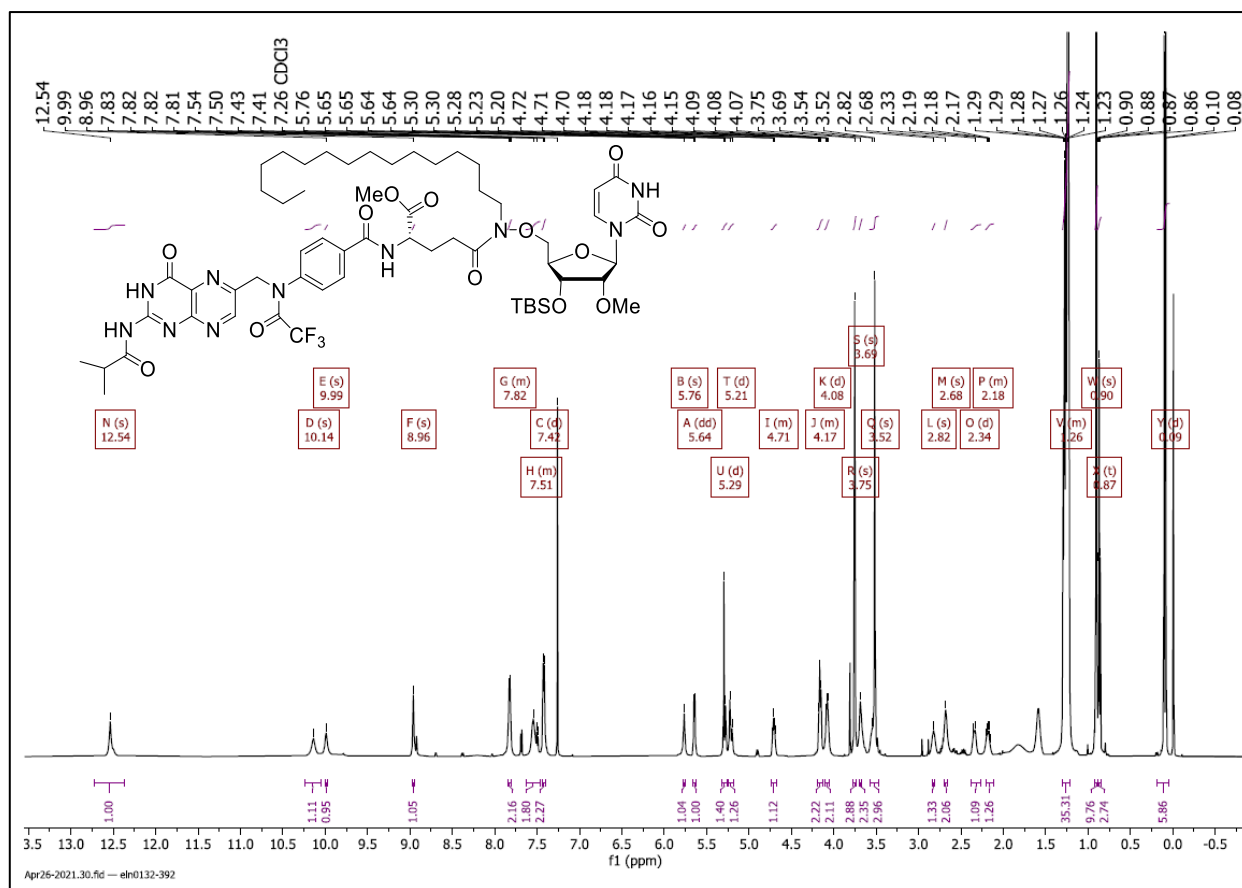

**<sup>1</sup>H NMR of compound 20 (600 MHz, CDCl<sub>3</sub>)**

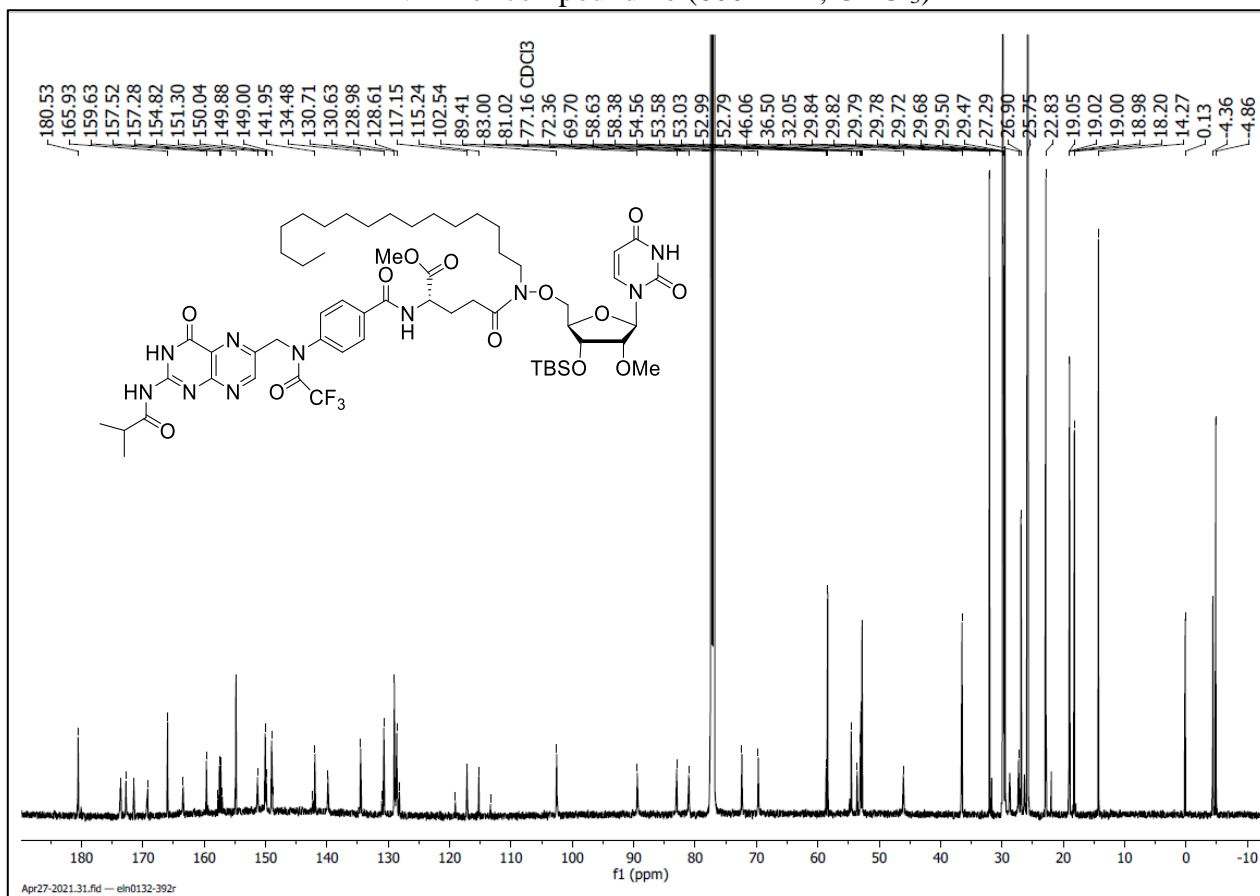

**<sup>13</sup>C NMR of compound 20 (151 MHz, CDCl<sub>3</sub>)**



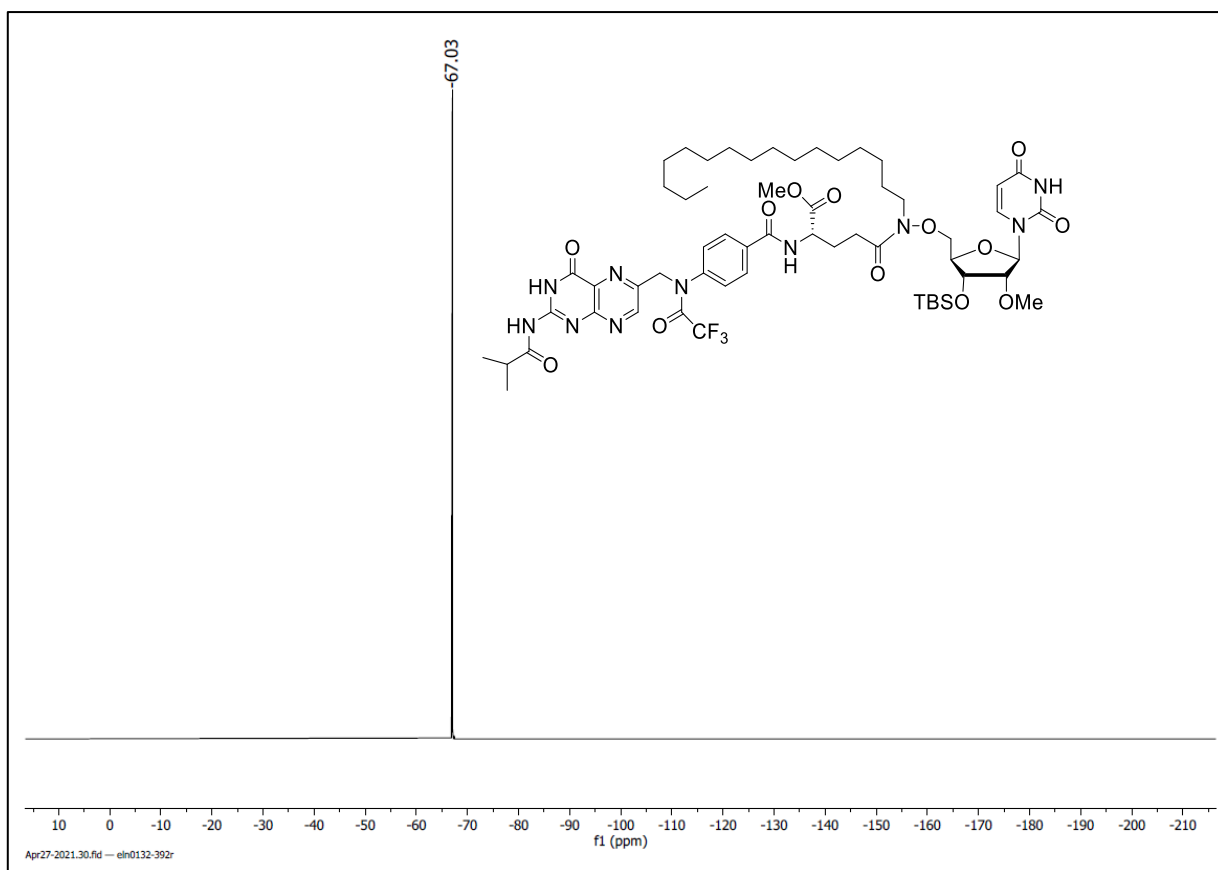

$^{19}\text{F}$  NMR of compound **20** (565 MHz,  $\text{CDCl}_3$ )

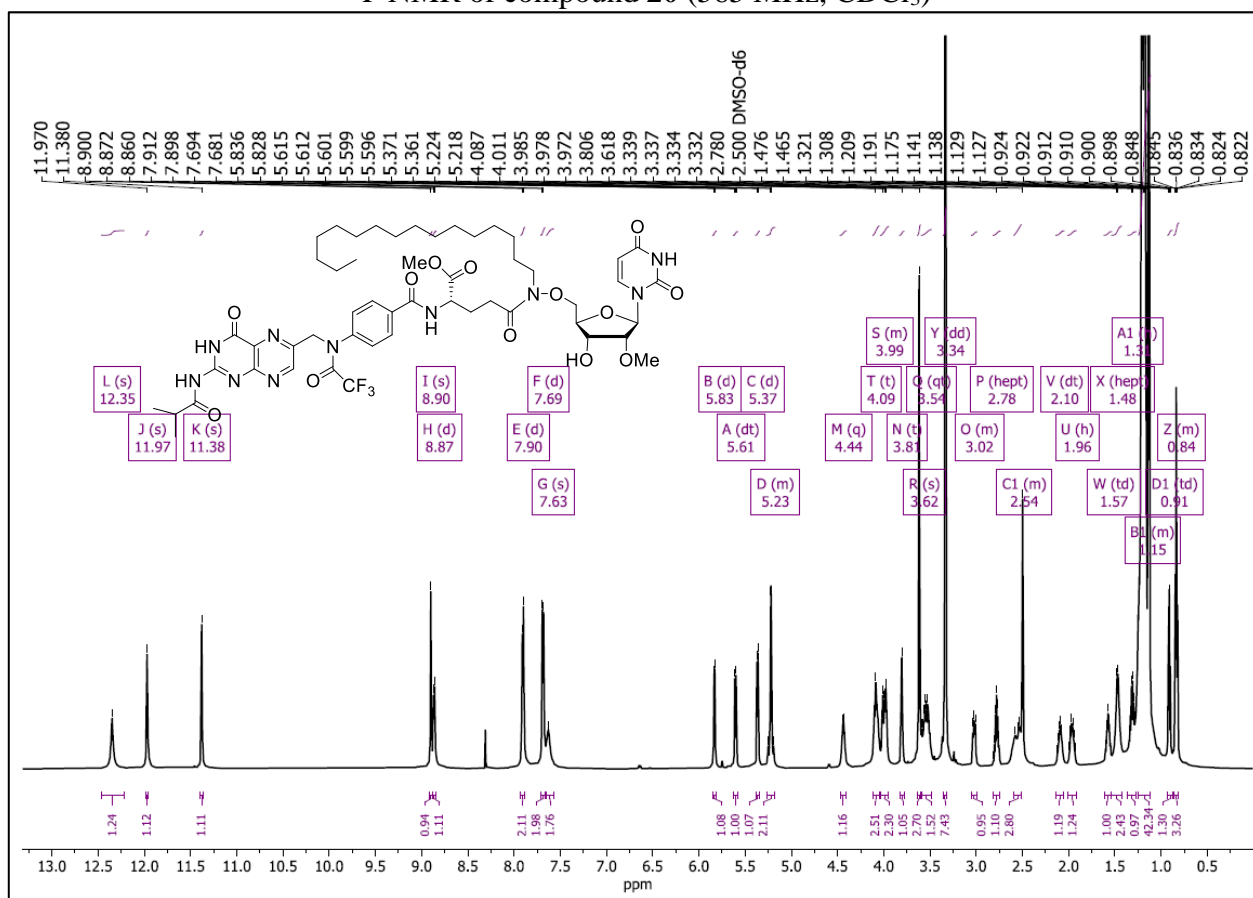

$^1\text{H}$  NMR of compound **22** (600 MHz,  $\text{DMSO}-d_6$ )

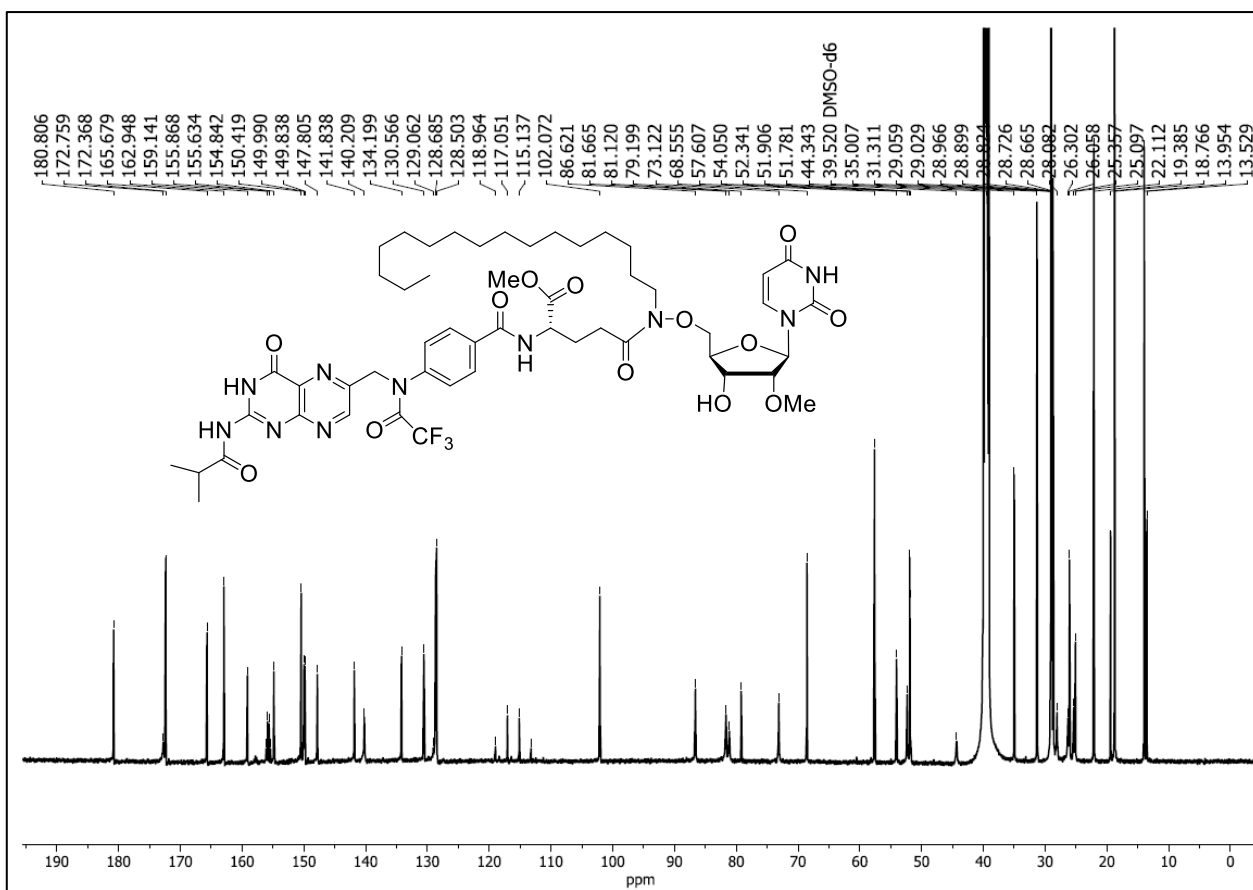

**<sup>13</sup>C NMR of compound 22 (151 MHz, DMSO-*d*<sub>6</sub>)**

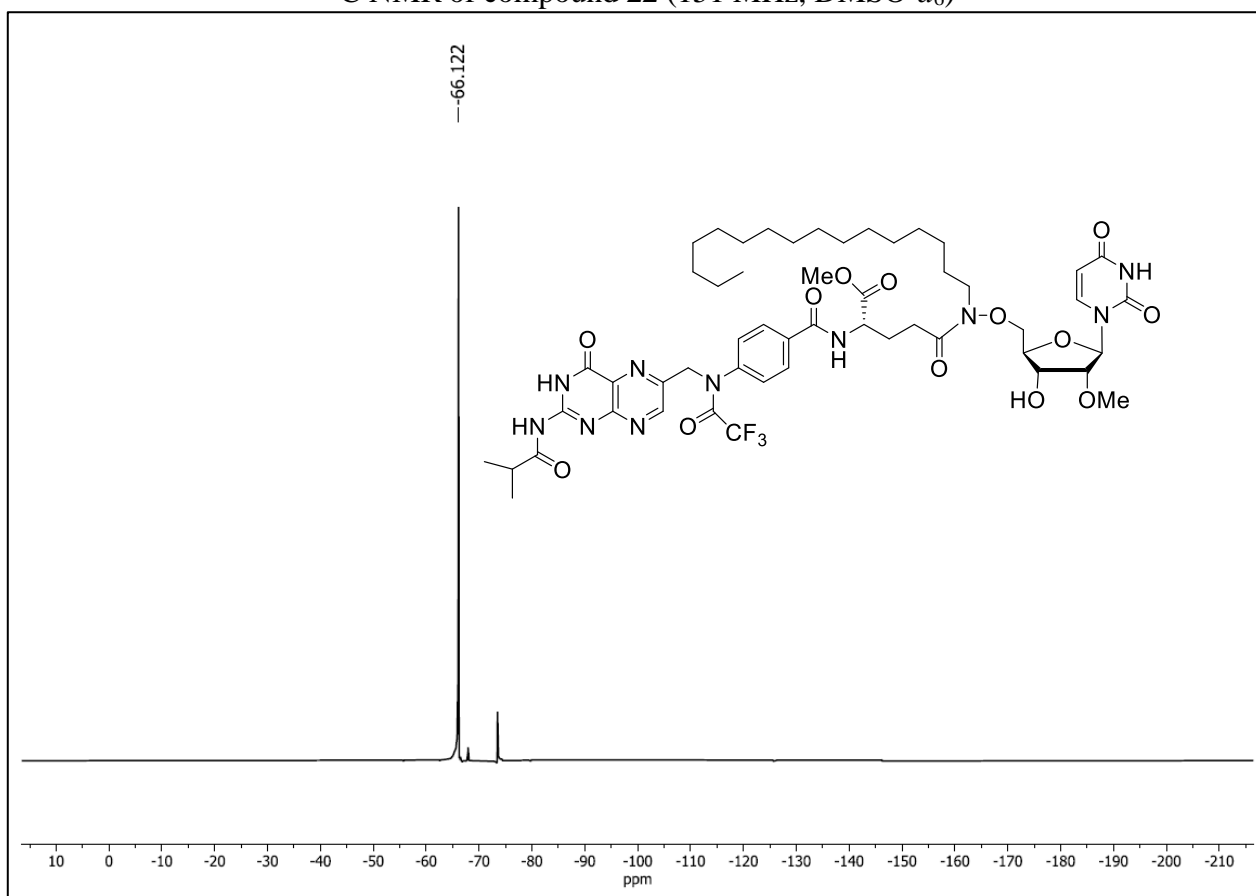

**<sup>19</sup>F NMR of compound 22 (565 MHz, DMSO-*d*<sub>6</sub>)**

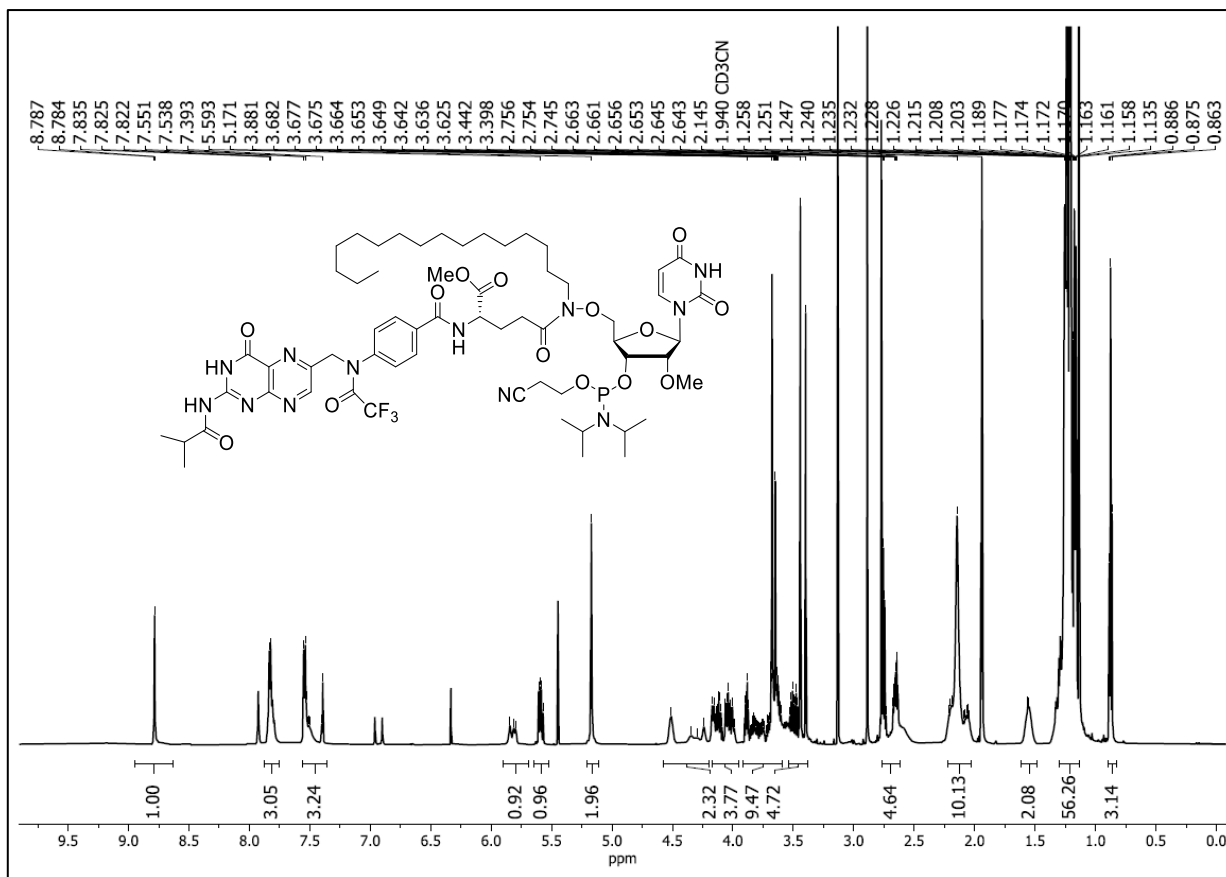

**<sup>1</sup>H NMR of compound 24 (600 MHz, CD<sub>3</sub>CN)**

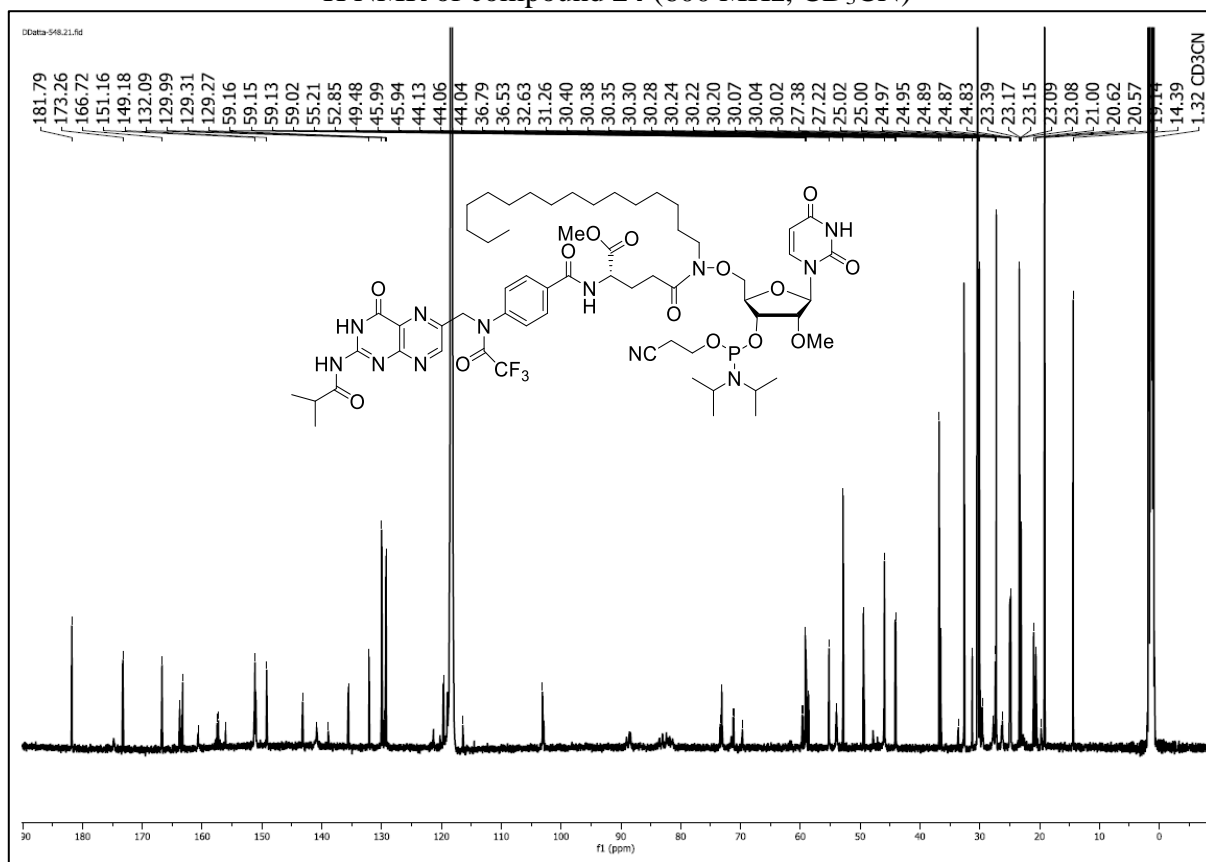

**<sup>13</sup>C NMR of compound 24 (151 MHz, CD<sub>3</sub>CN)**

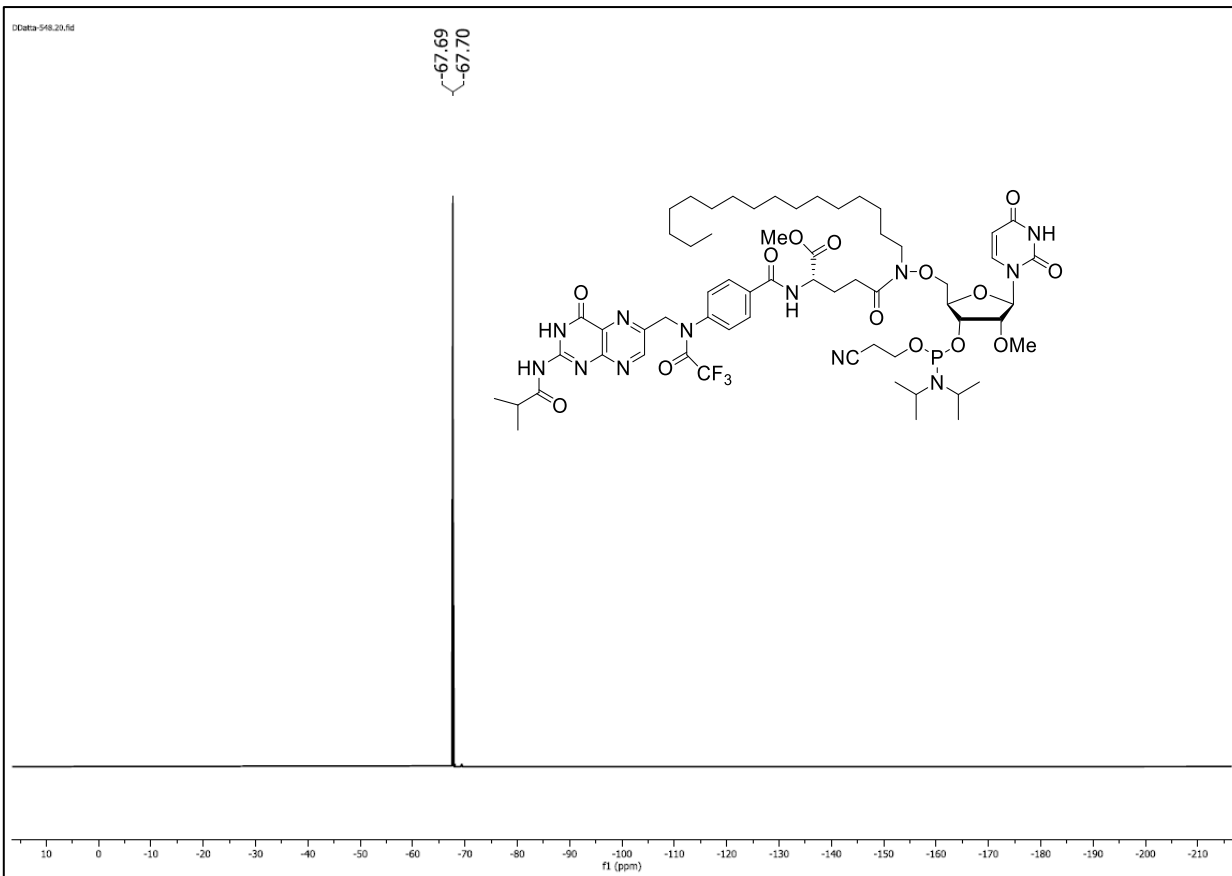

<sup>19</sup>F NMR of compound **24** (565 MHz, CD<sub>3</sub>CN)

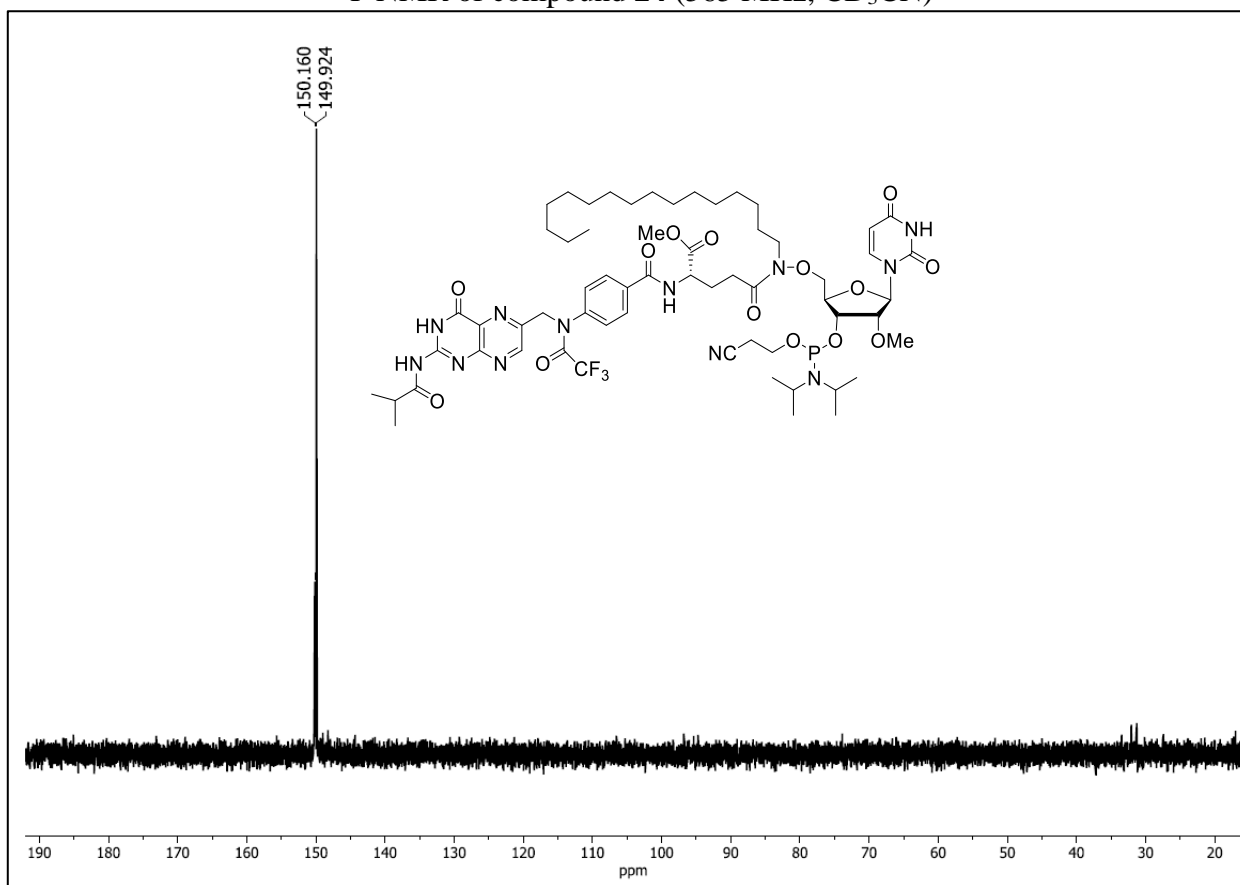

<sup>31</sup>P NMR of compound **24** (243 MHz, CD<sub>3</sub>CN)

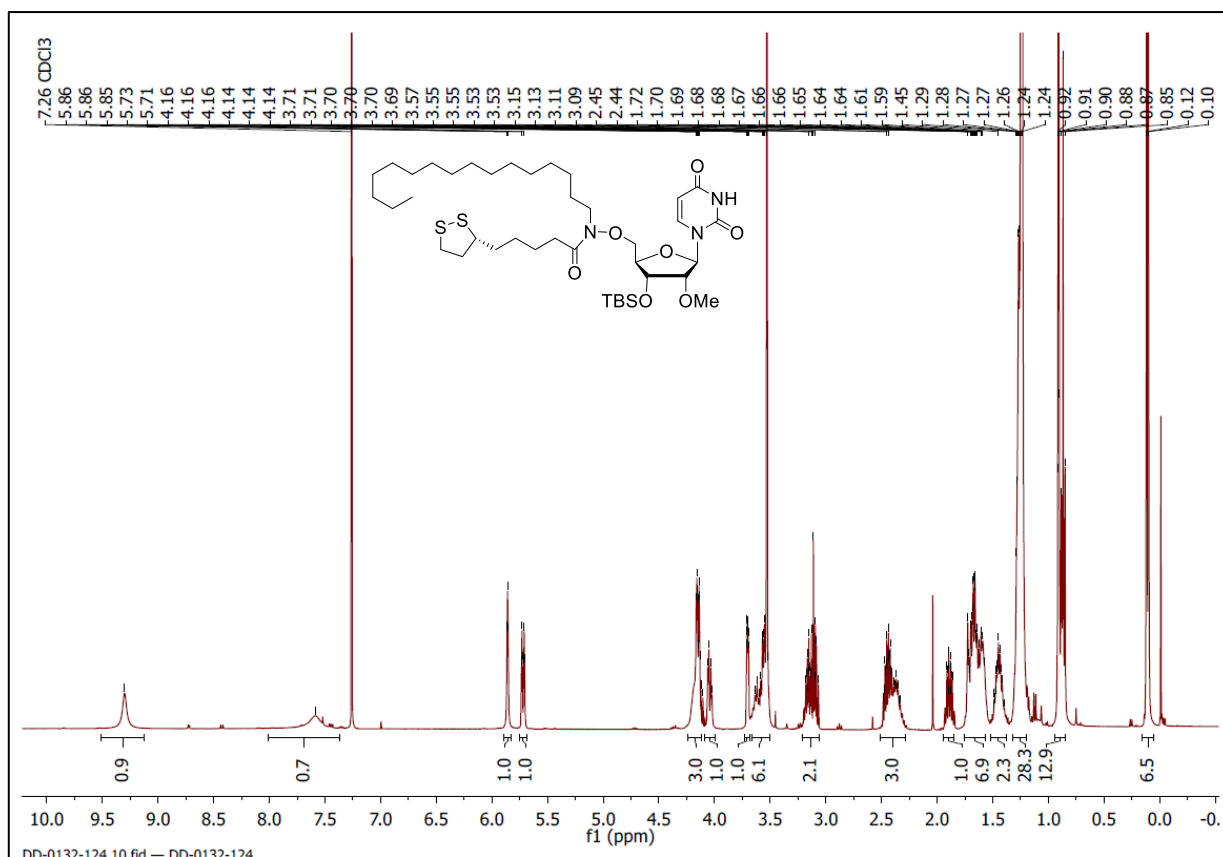

<sup>1</sup>H NMR of compound **21** (400 MHz, CDCl<sub>3</sub>)

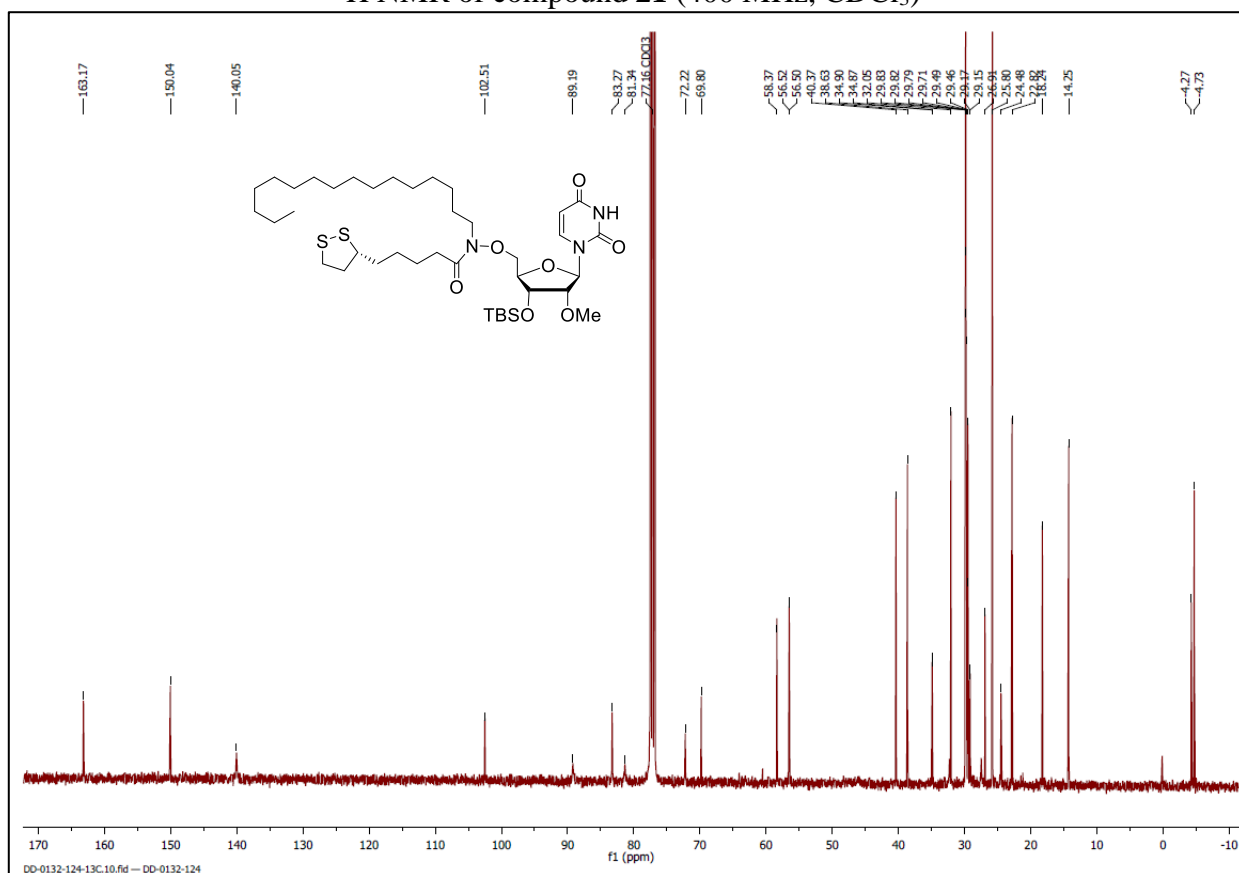

<sup>13</sup>C NMR of compound **21** (101 MHz, CDCl<sub>3</sub>)

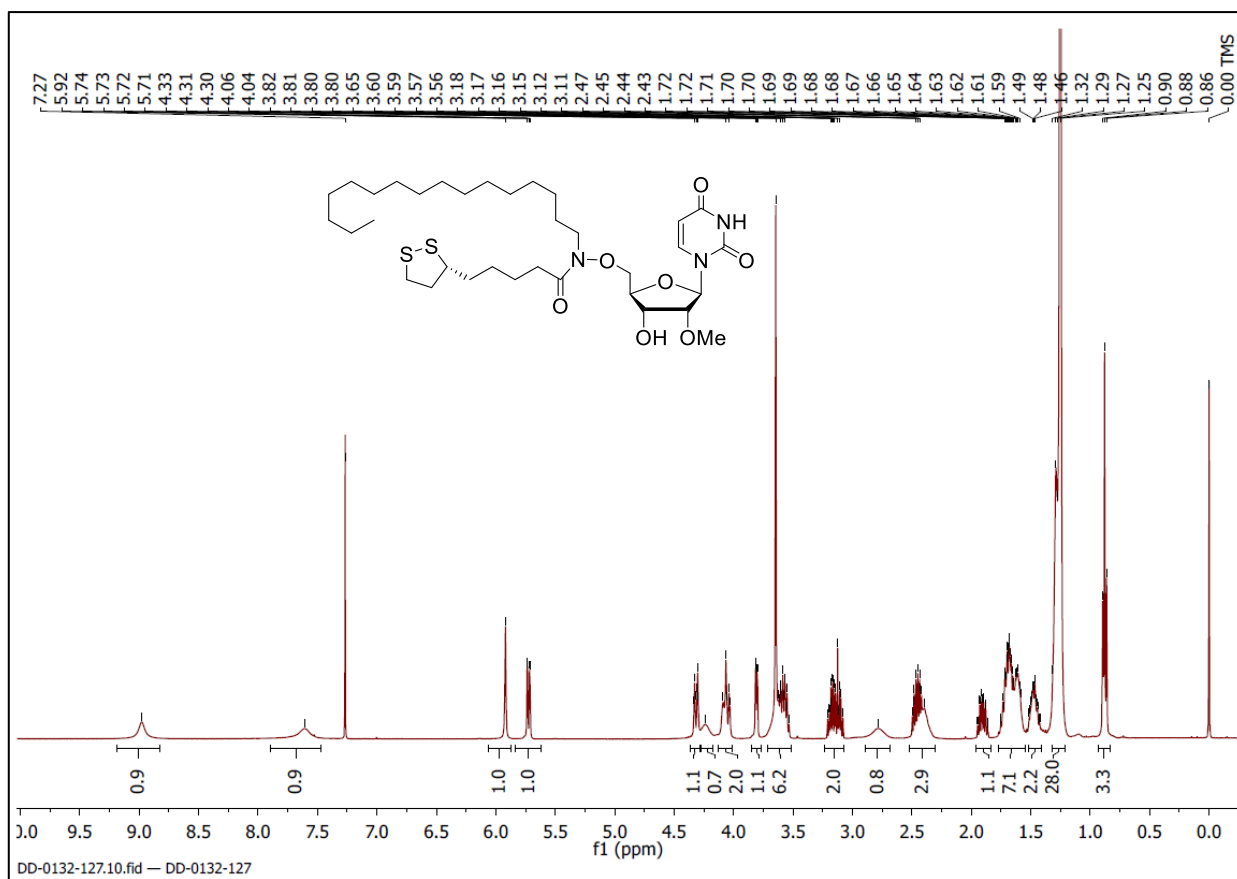

$^1\text{H}$  NMR of compound **23** (400 MHz,  $\text{CDCl}_3$ )

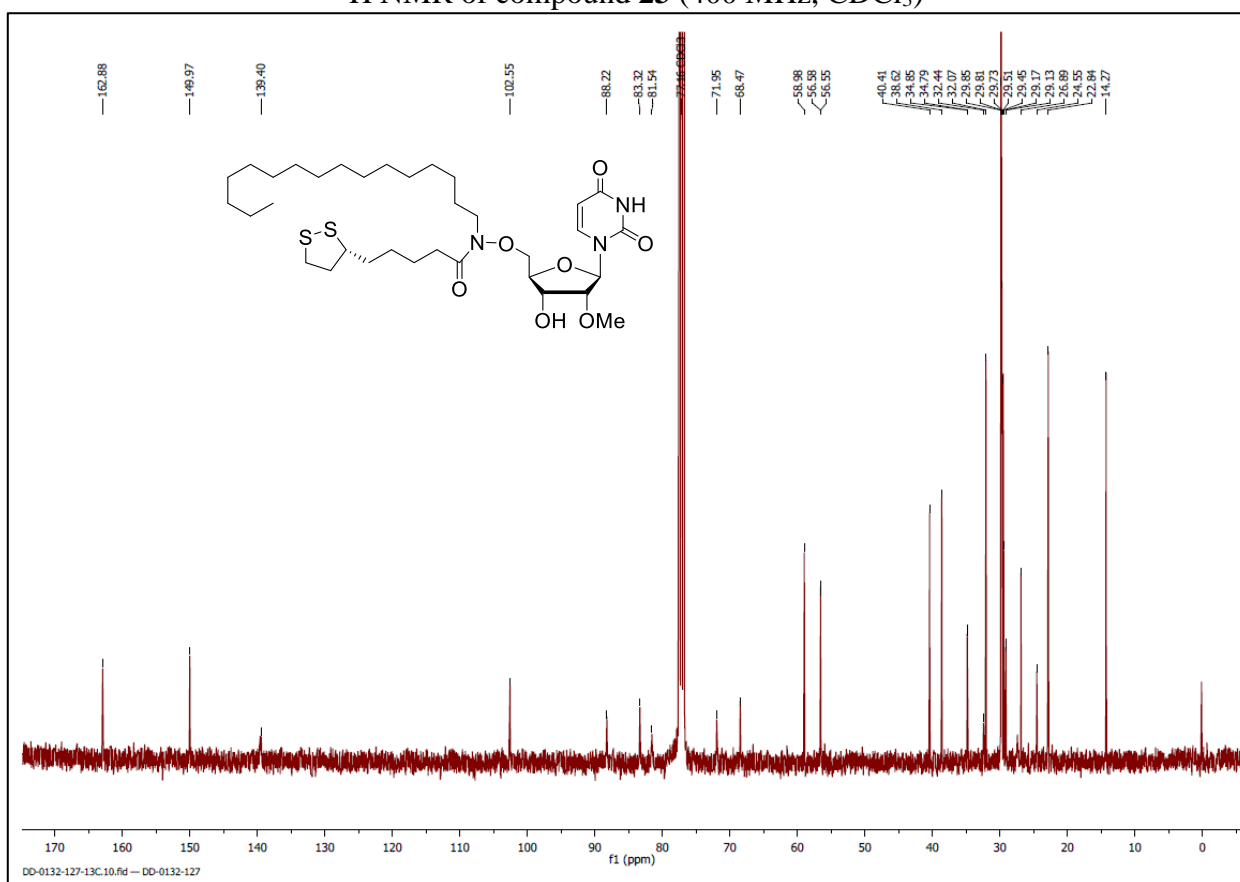

$^{13}\text{C}$  NMR of compound **23** (101 MHz,  $\text{CDCl}_3$ )

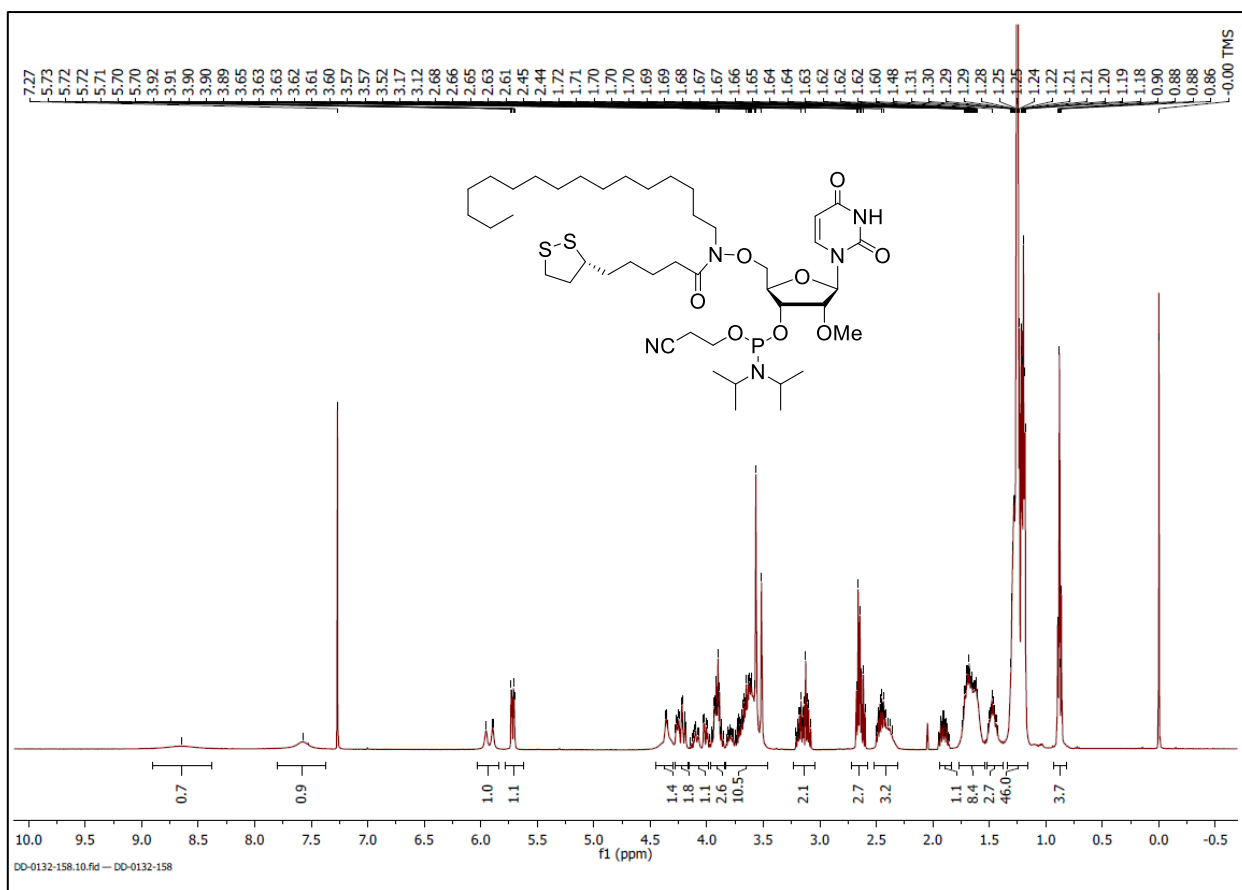

<sup>1</sup>H NMR of compound **25** (400 MHz, CDCl<sub>3</sub>)

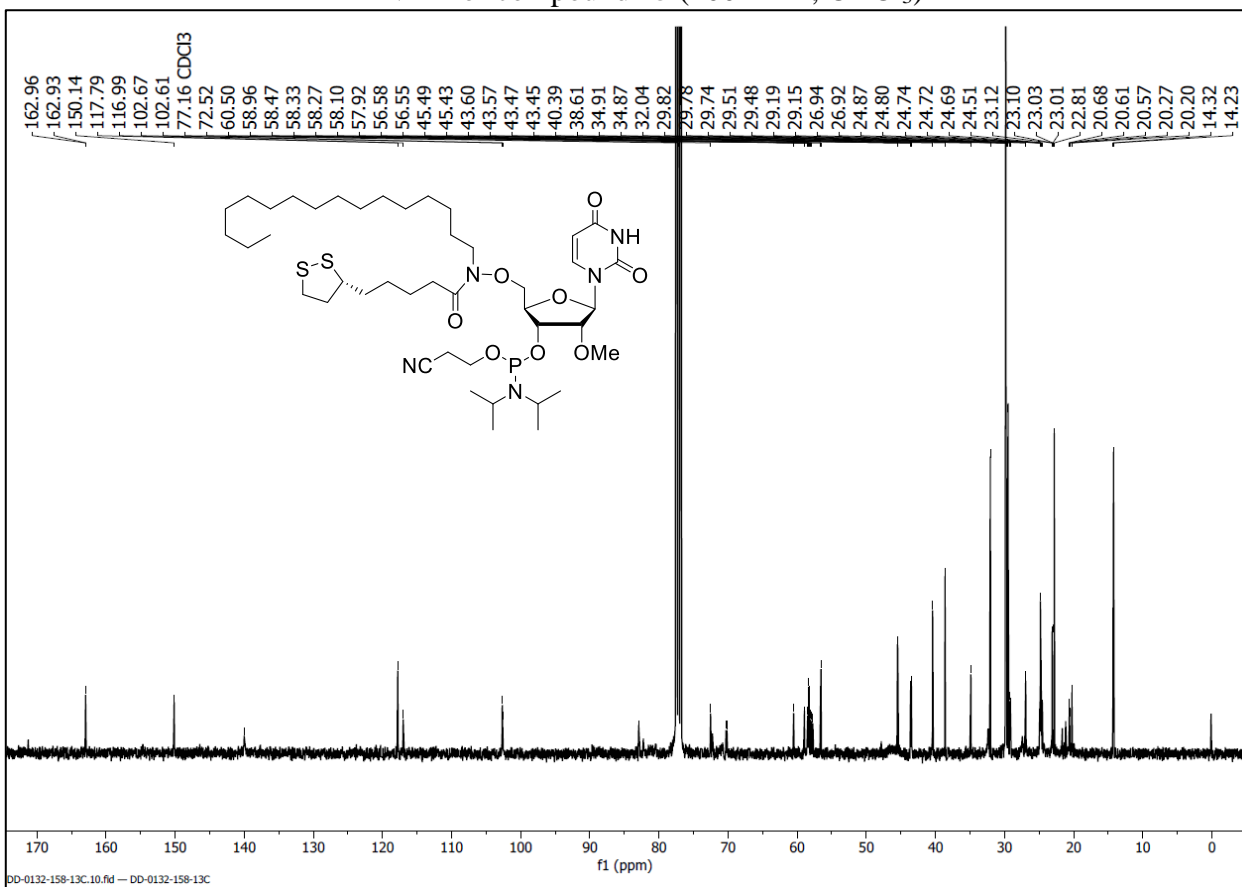

<sup>13</sup>C NMR of compound **25** (101 MHz, CDCl<sub>3</sub>)

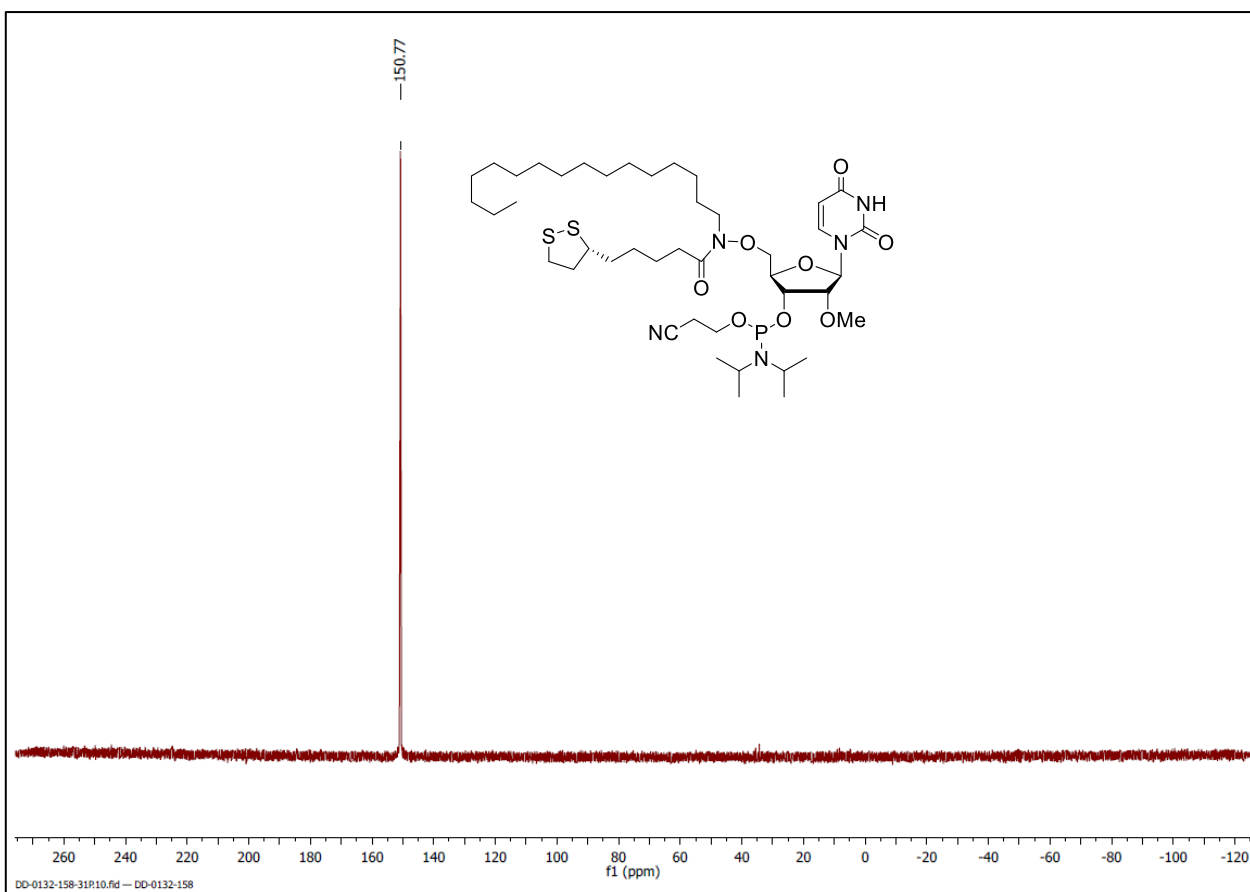

<sup>31</sup>P NMR of compound **25** (162 MHz, CDCl<sub>3</sub>)

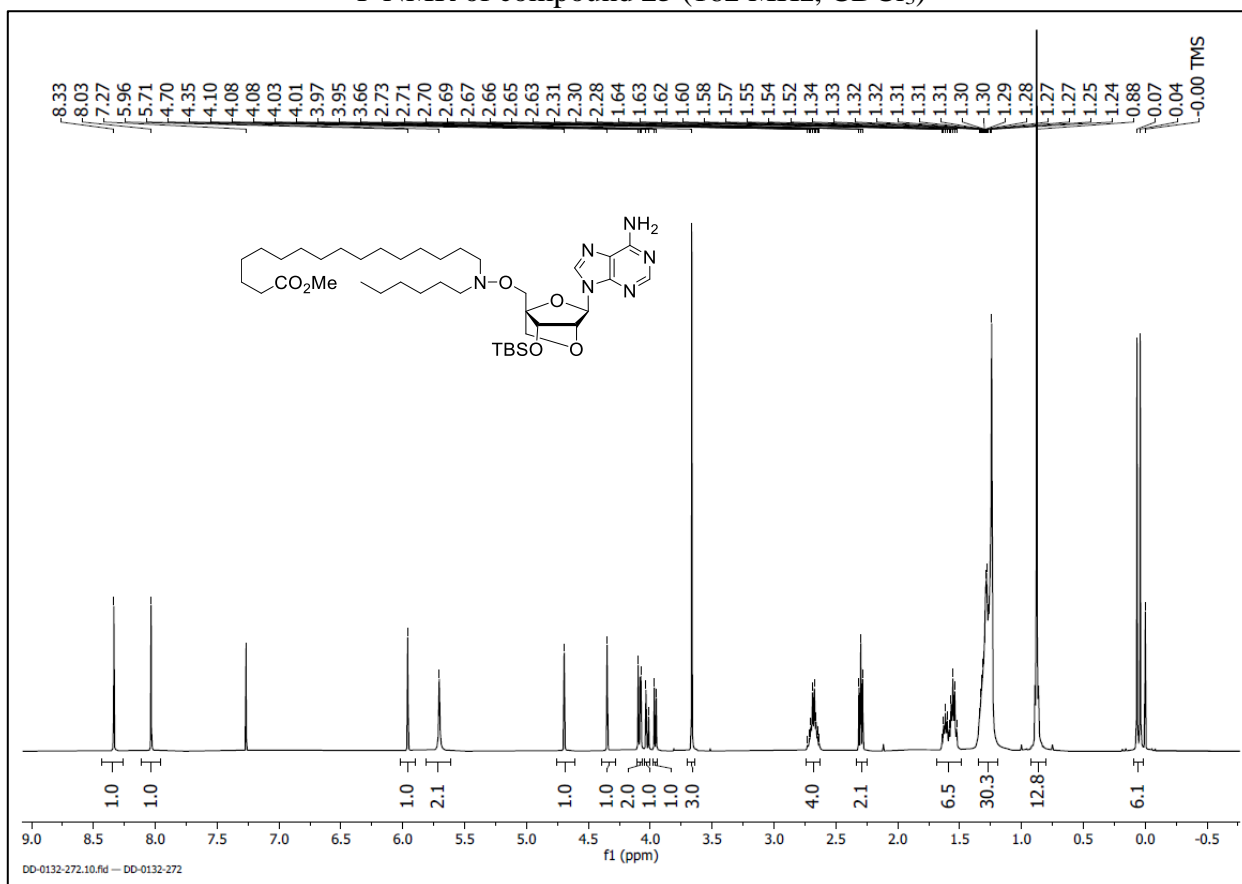

<sup>1</sup>H NMR of compound **26** (500 MHz, CDCl<sub>3</sub>)



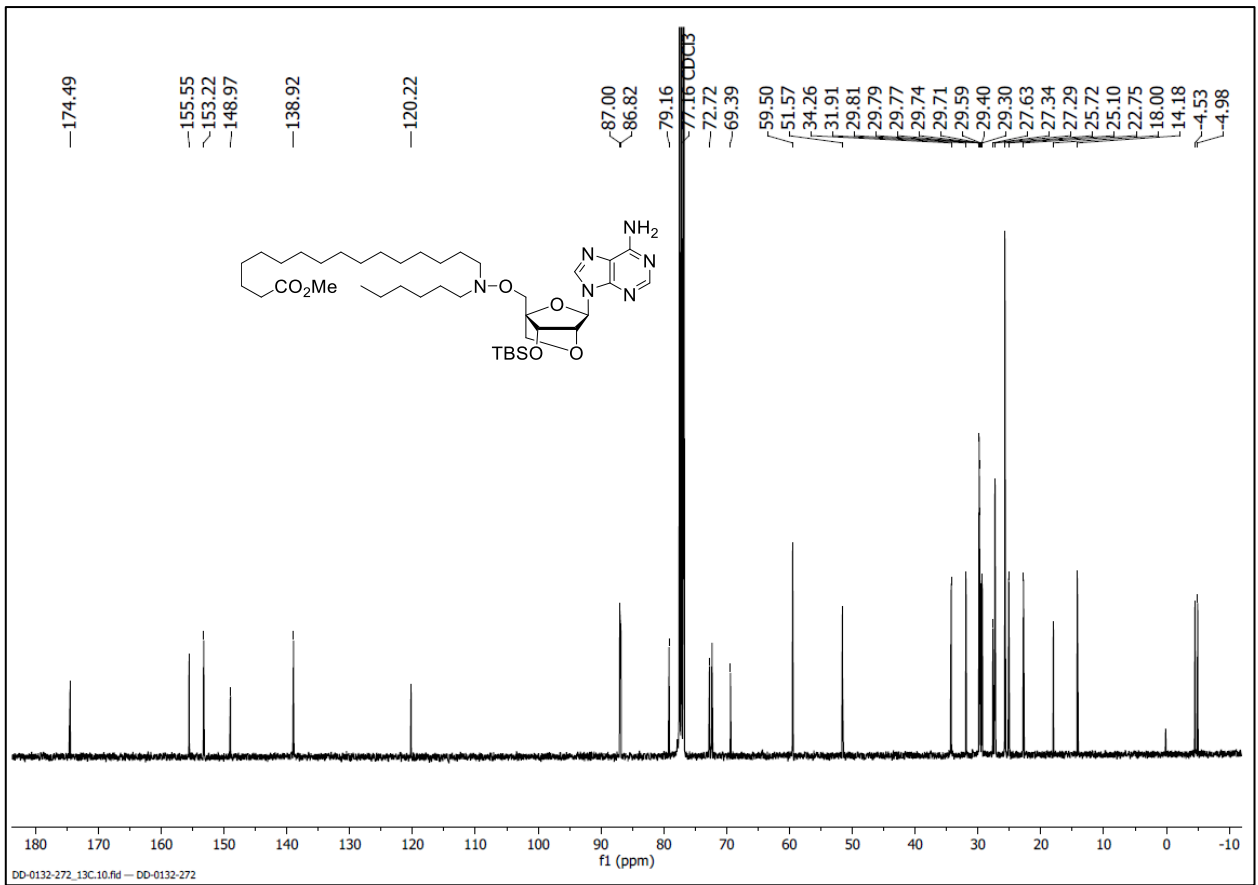

<sup>13</sup>C NMR of compound 26 (101 MHz, CDCl<sub>3</sub>)

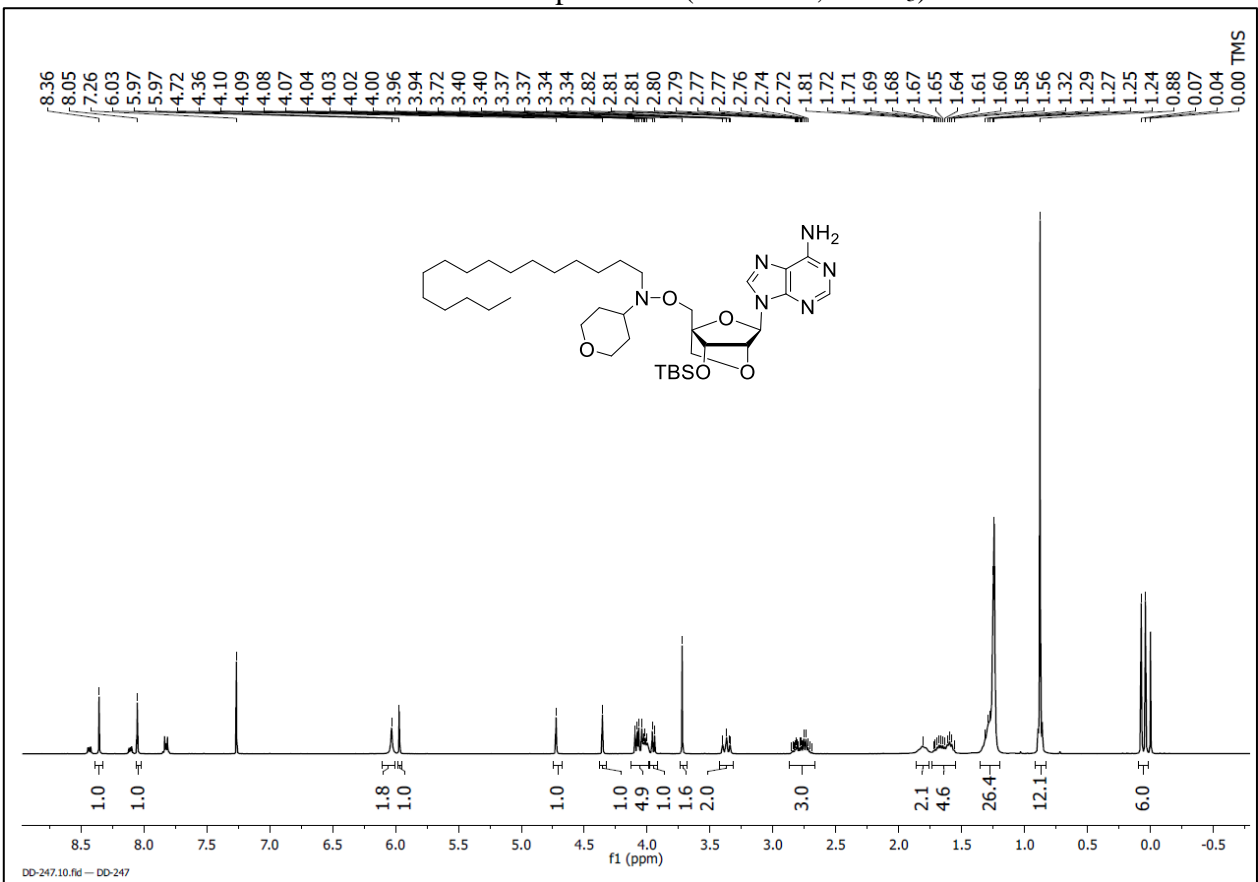

<sup>1</sup>H NMR of compound 27 (400 MHz, CDCl<sub>3</sub>)

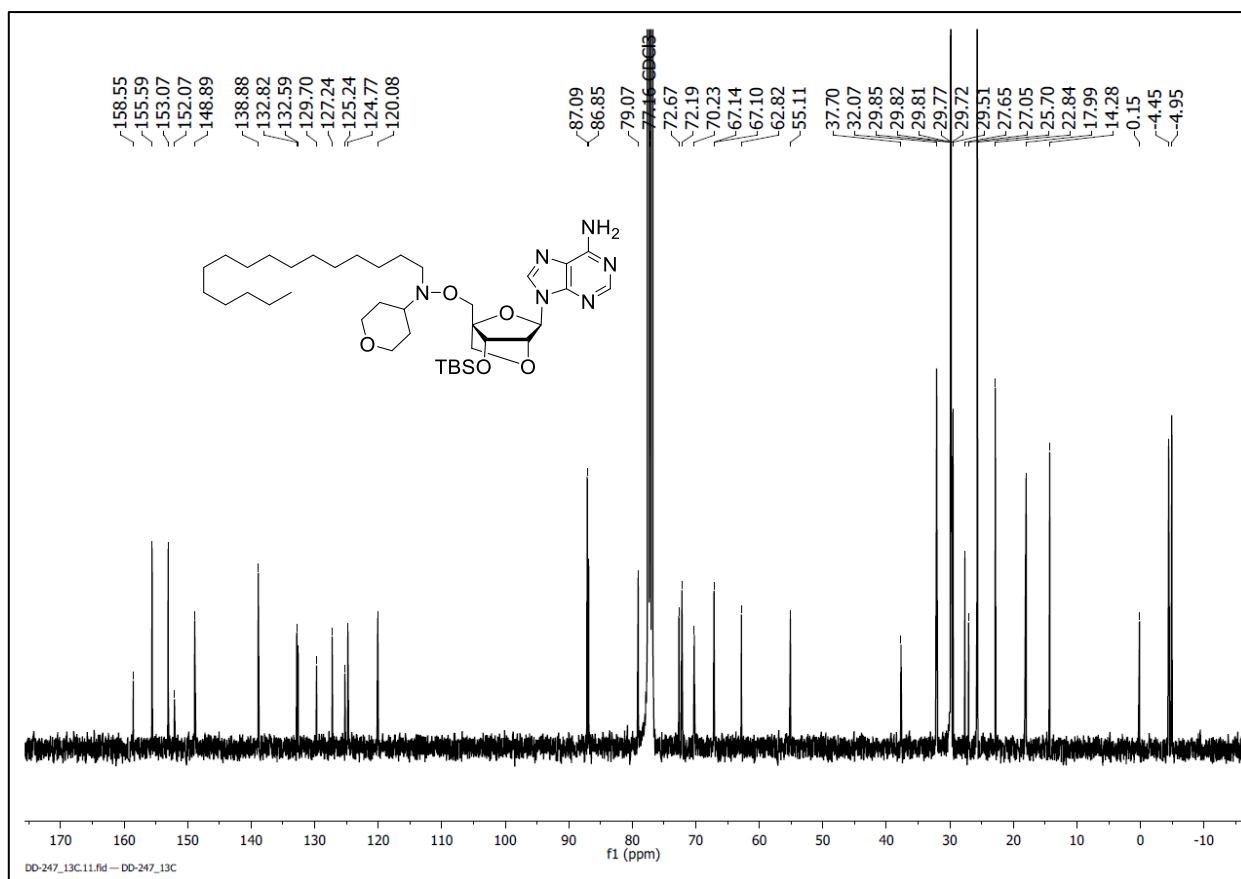

<sup>13</sup>C NMR of compound **27** (101 MHz, CDCl<sub>3</sub>)

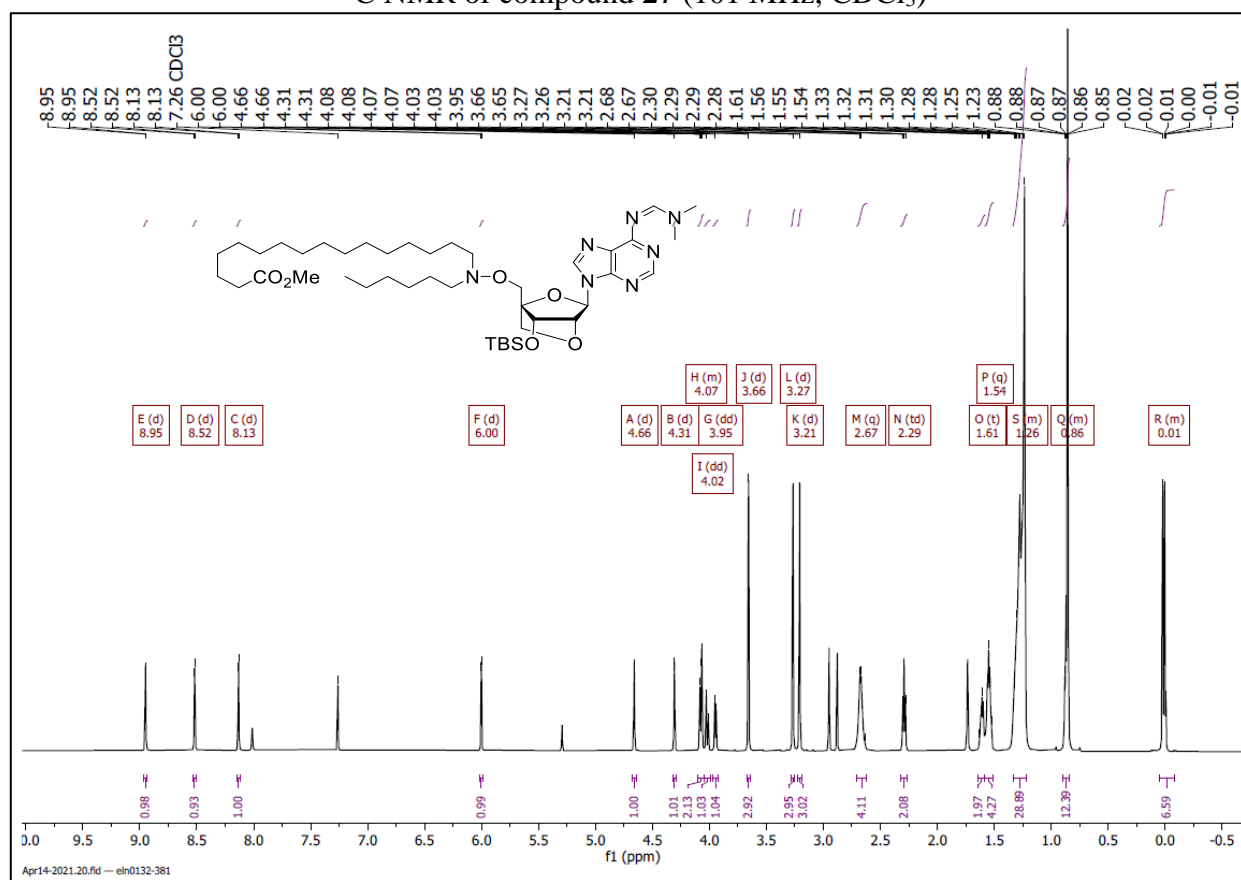

<sup>1</sup>H NMR of compound **28** (600 MHz, CDCl<sub>3</sub>)

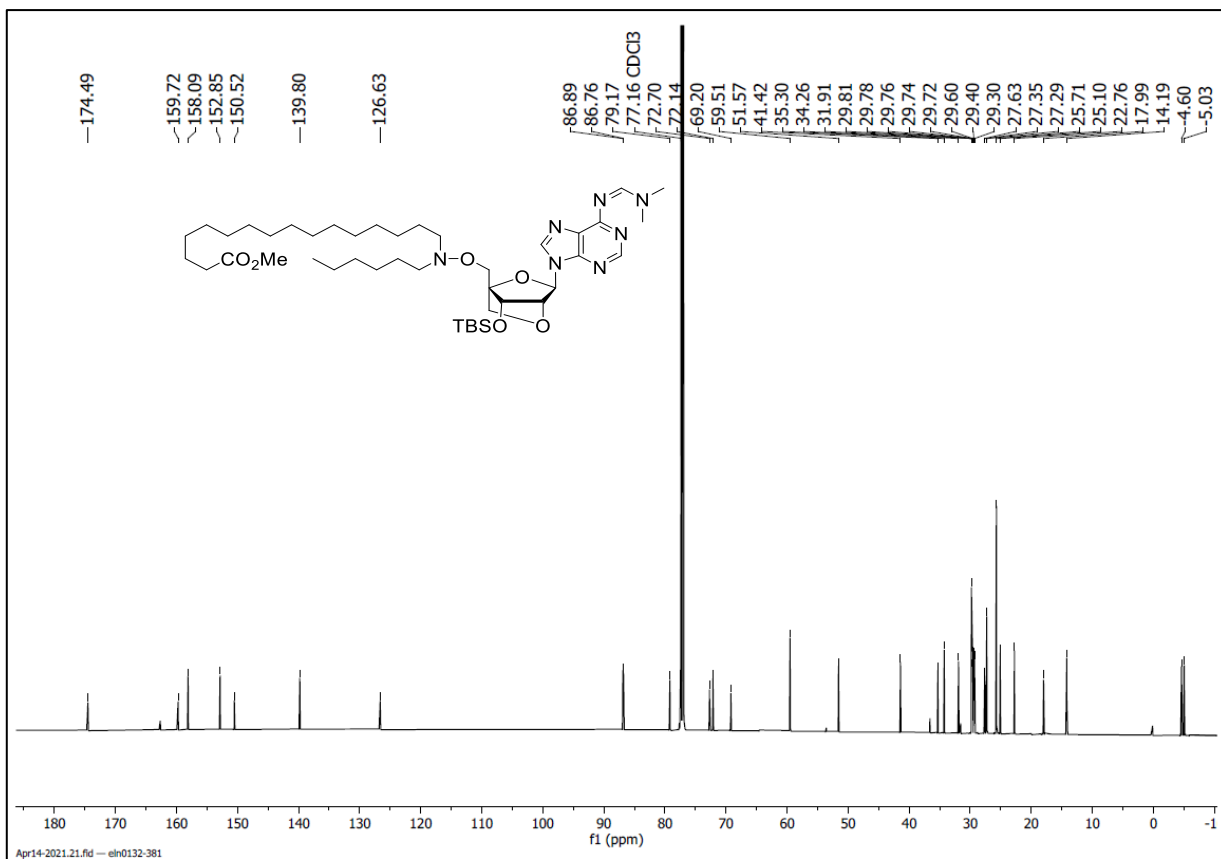

$^{13}\text{C}$  NMR of compound 28 (151 MHz,  $\text{CDCl}_3$ )

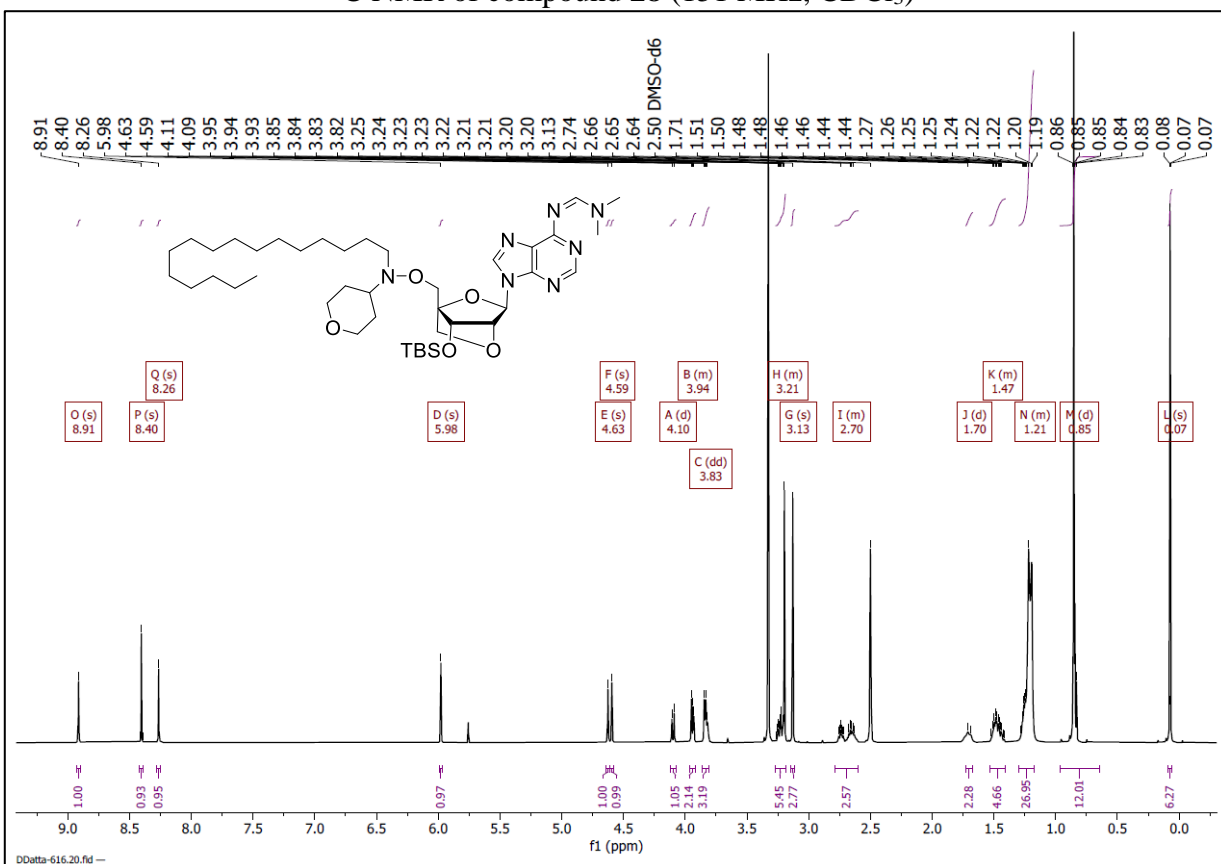

$^1\text{H}$  NMR of compound 29 (600 MHz,  $\text{DMSO}-d_6$ )

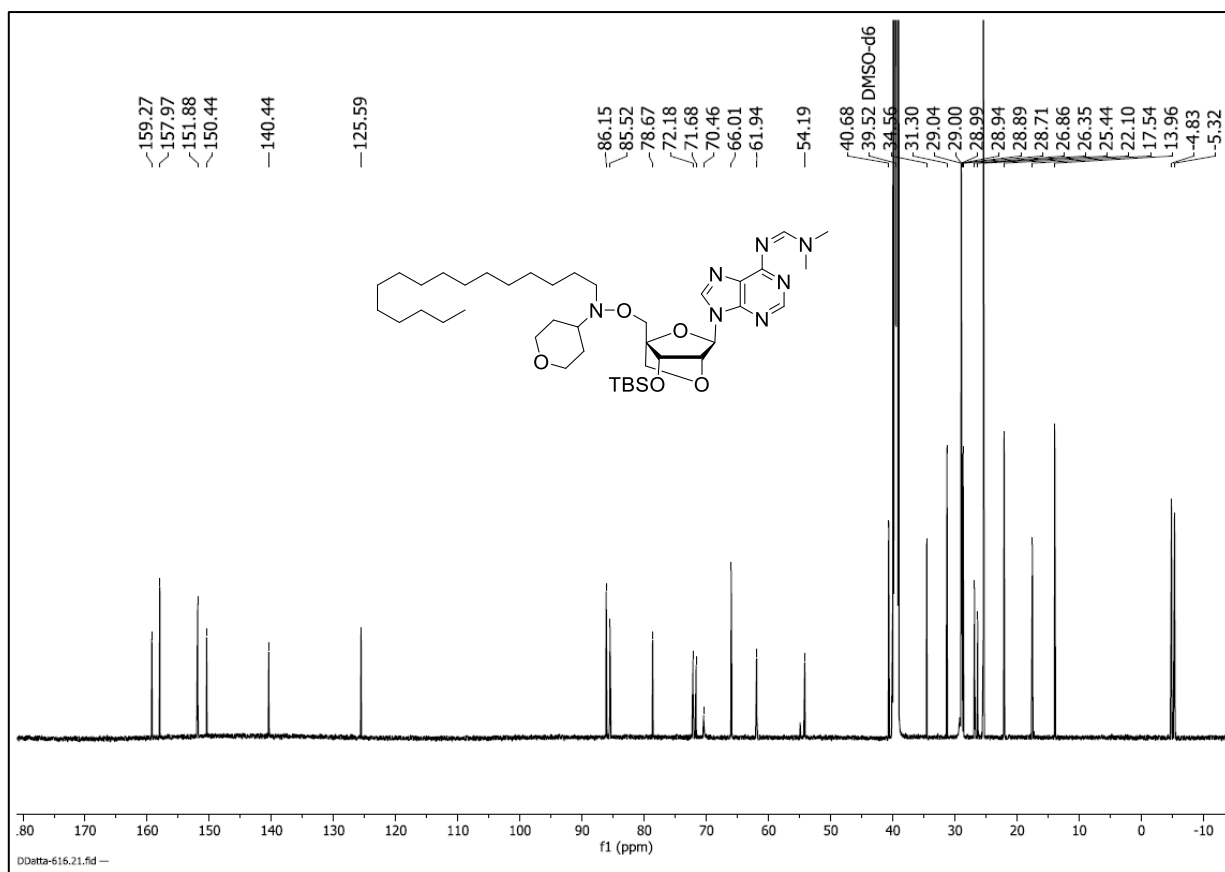

$^{13}\text{C}$  NMR of compound **29** (151 MHz,  $\text{DMSO-}d_6$ )

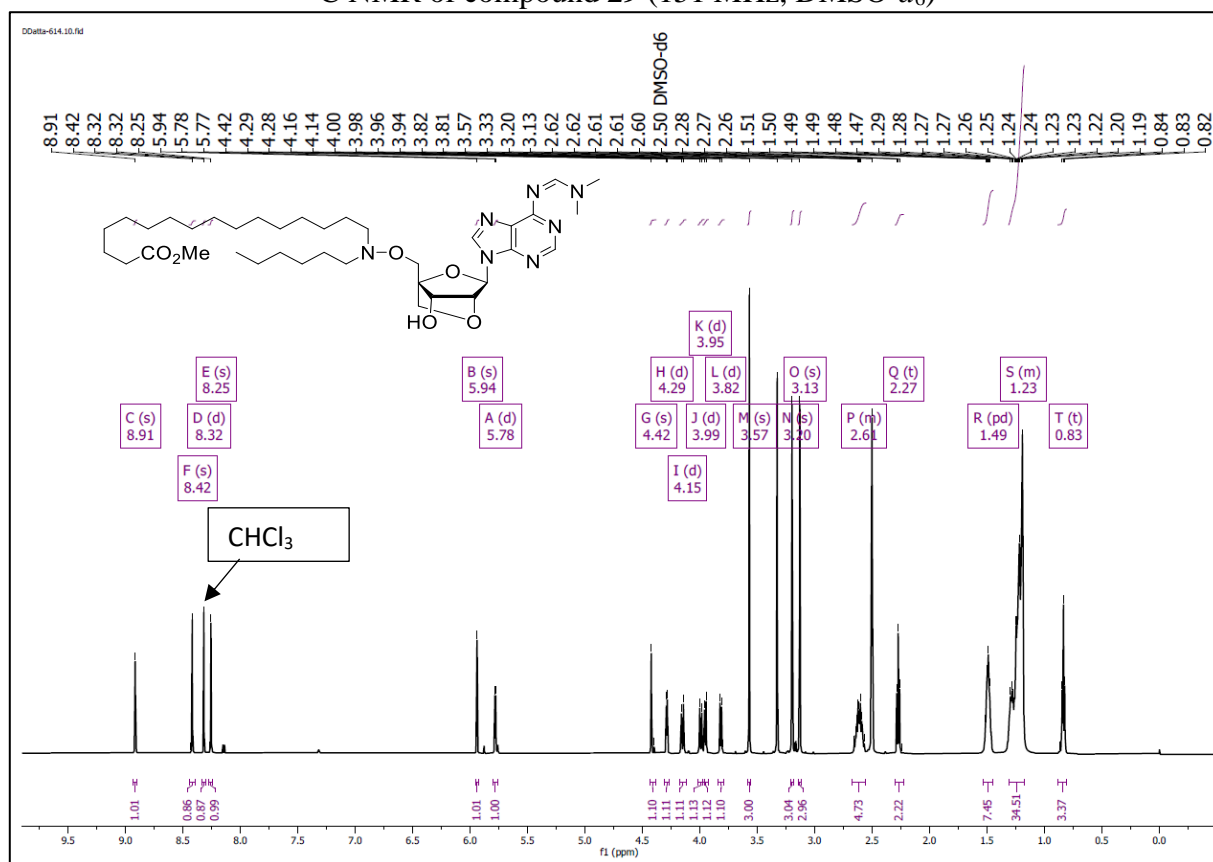

$^1\text{H}$  NMR of compound **30** (600 MHz,  $\text{DMSO-}d_6$ )

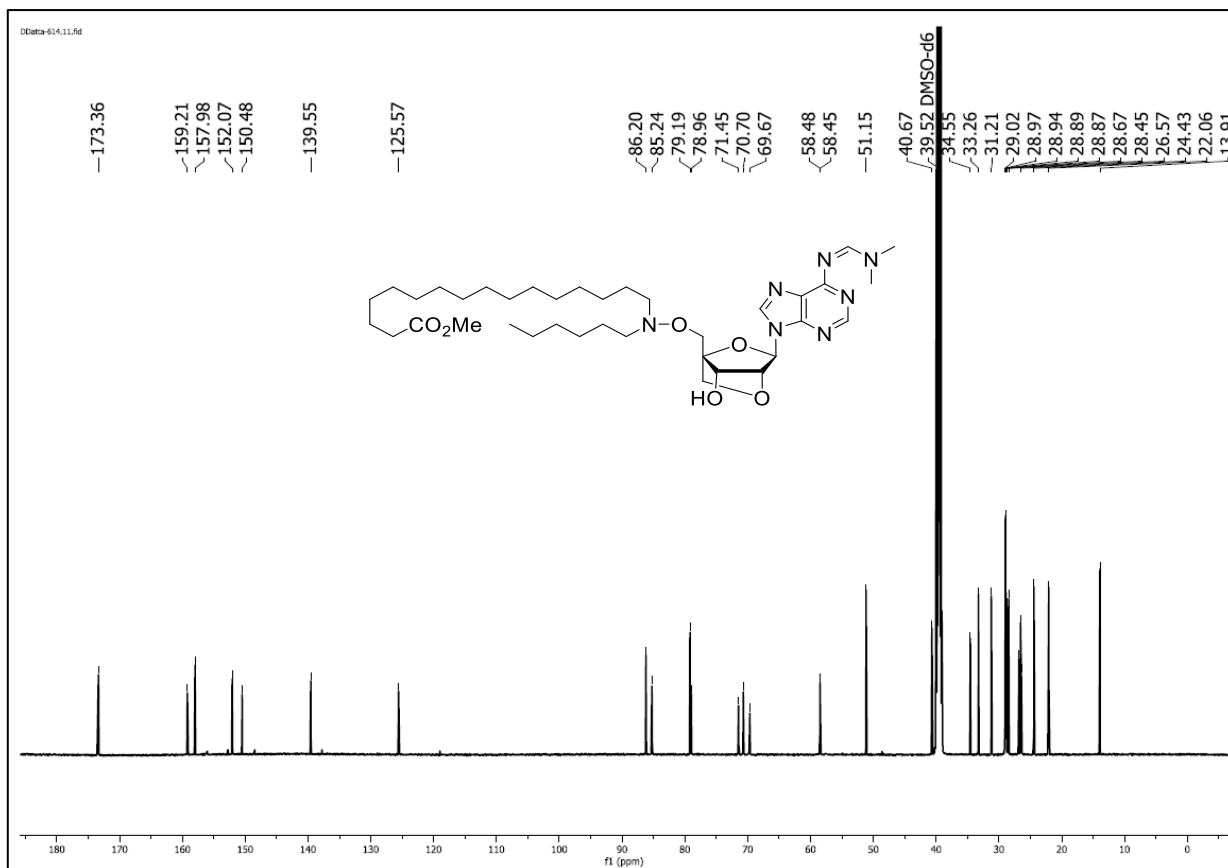

$^{13}\text{C}$  NMR of compound **30** (151 MHz, DMSO- $d_6$ )

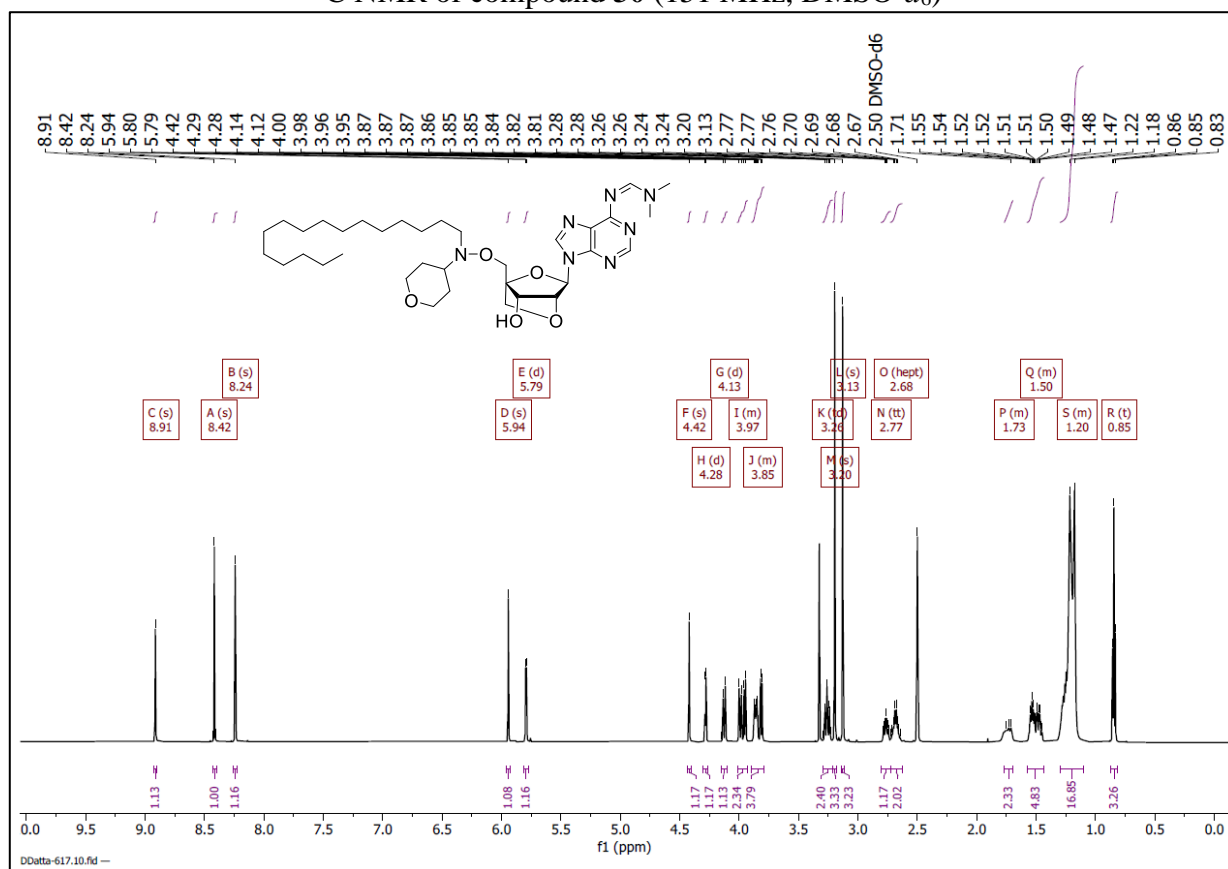

$^1\text{H}$  NMR of compound **31** (600 MHz, DMSO- $d_6$ )

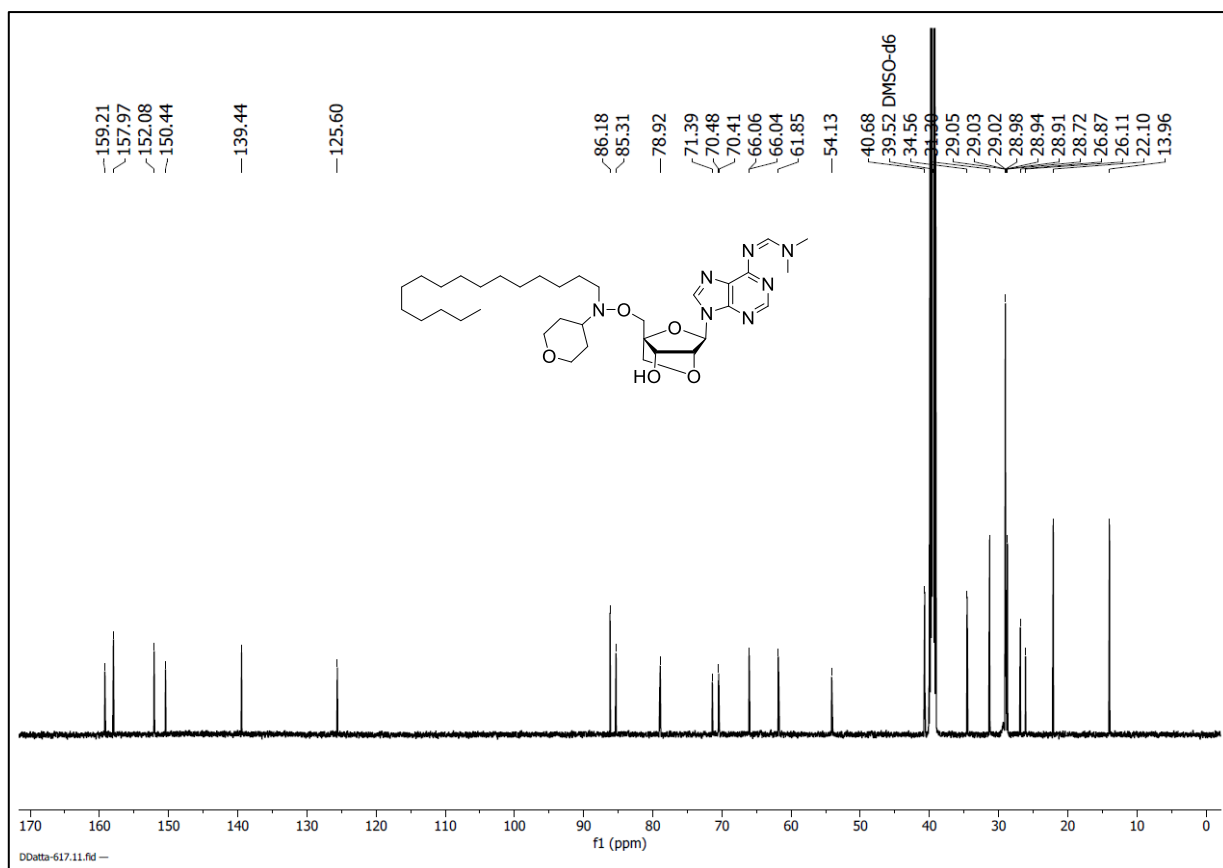

<sup>13</sup>C NMR of compound **31** (151 MHz, DMSO-*d*<sub>6</sub>)

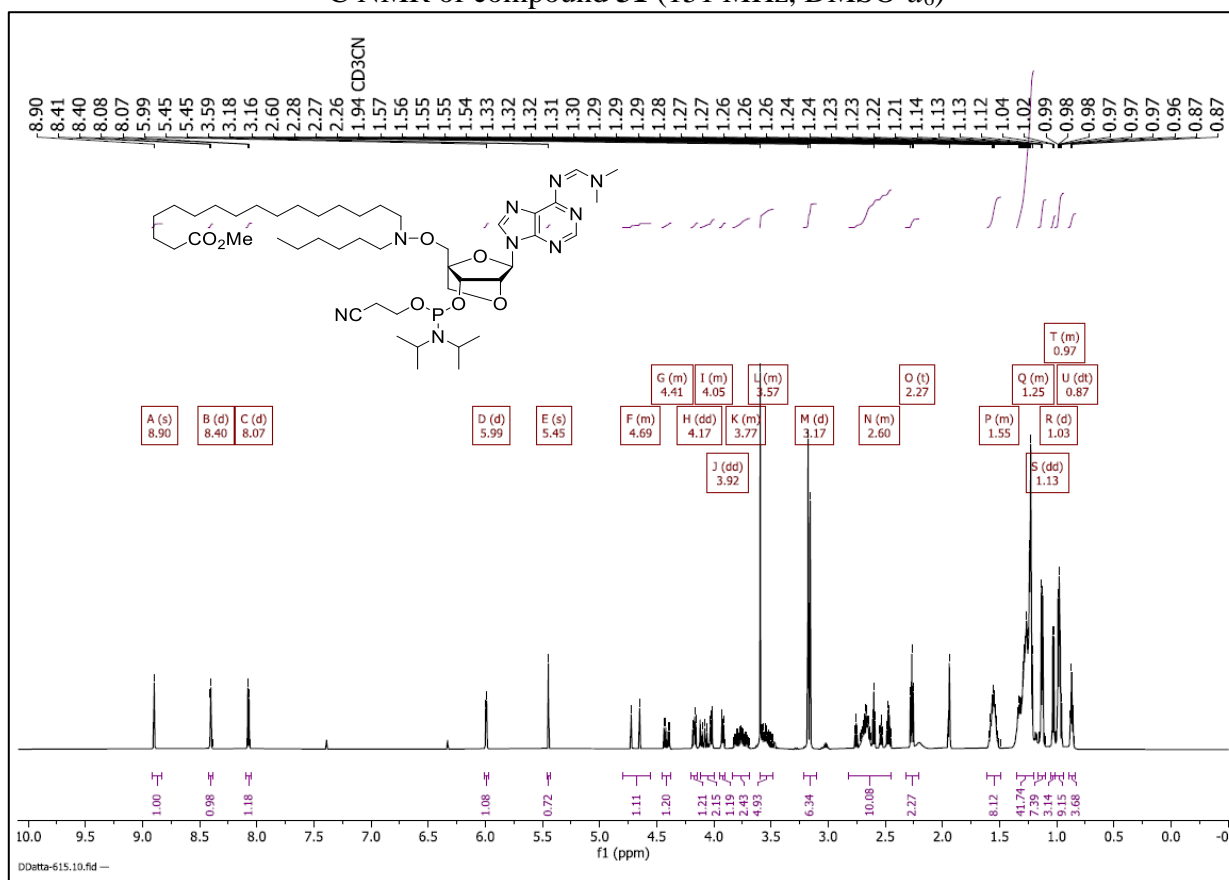

<sup>1</sup>H NMR of compound **32** (600 MHz, CD<sub>3</sub>CN)

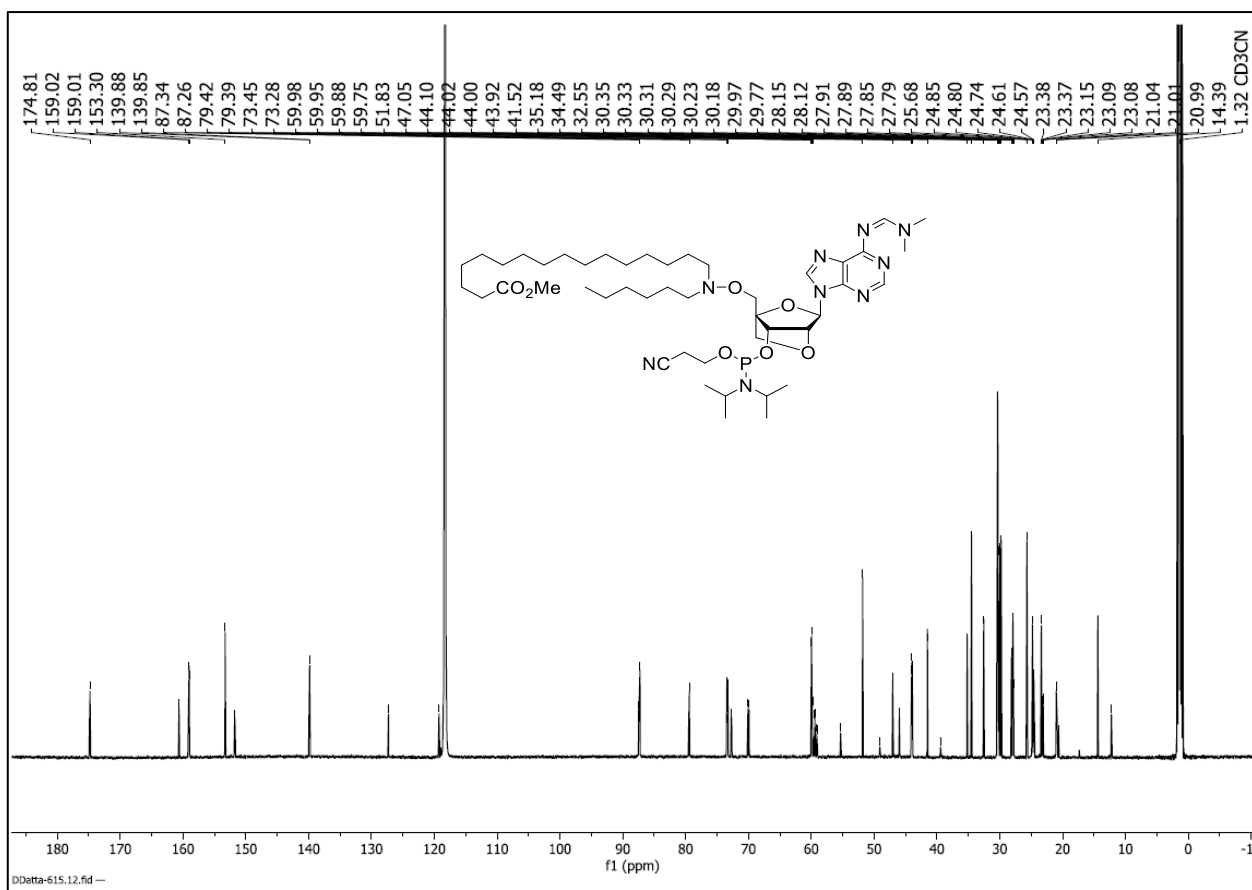

<sup>13</sup>C NMR compound **32** (151 MHz, CD<sub>3</sub>CN)

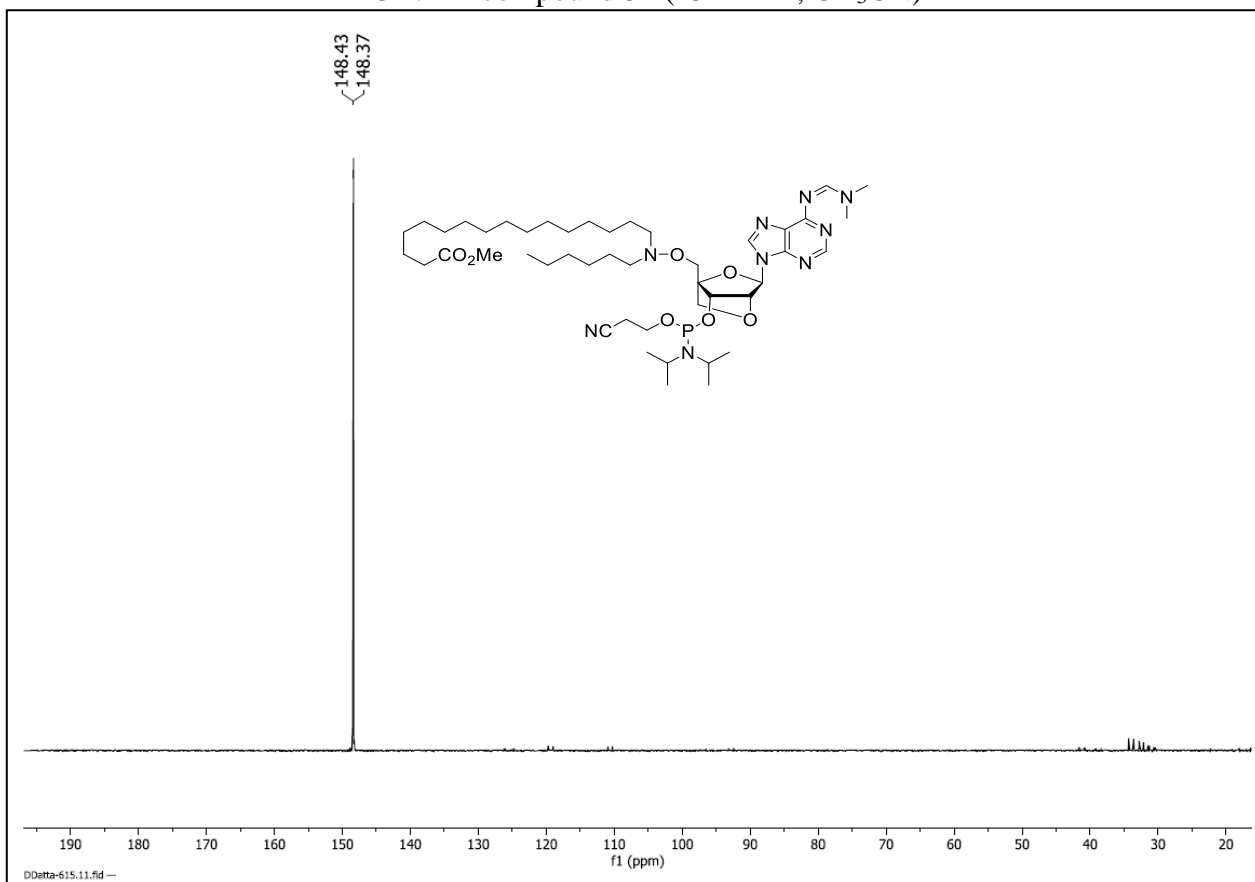

<sup>31</sup>P NMR of compound **32** (243 MHz, CD<sub>3</sub>CN)

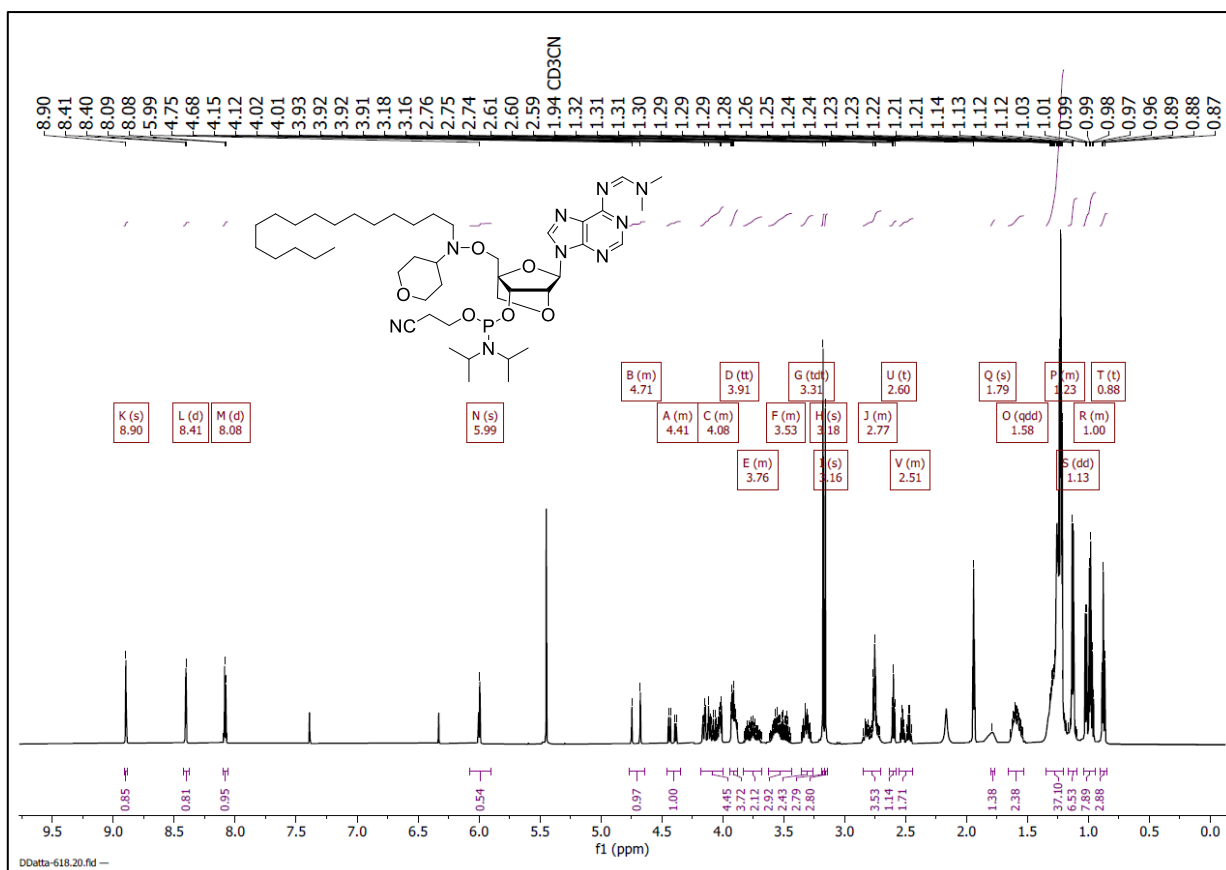

<sup>1</sup>H NMR of compound 33 (600 MHz, CD<sub>3</sub>CN)

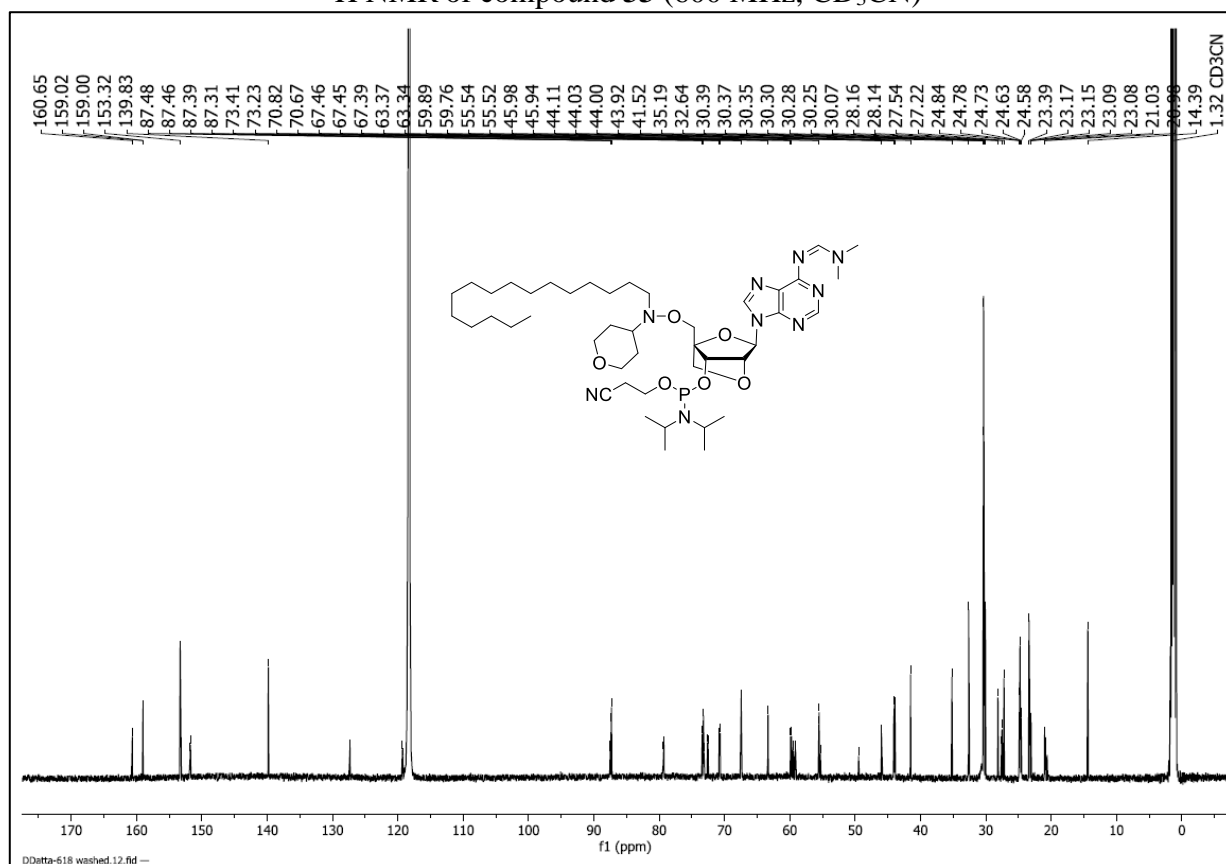

<sup>13</sup>C NMR compound 33 (151 MHz, CD<sub>3</sub>CN)



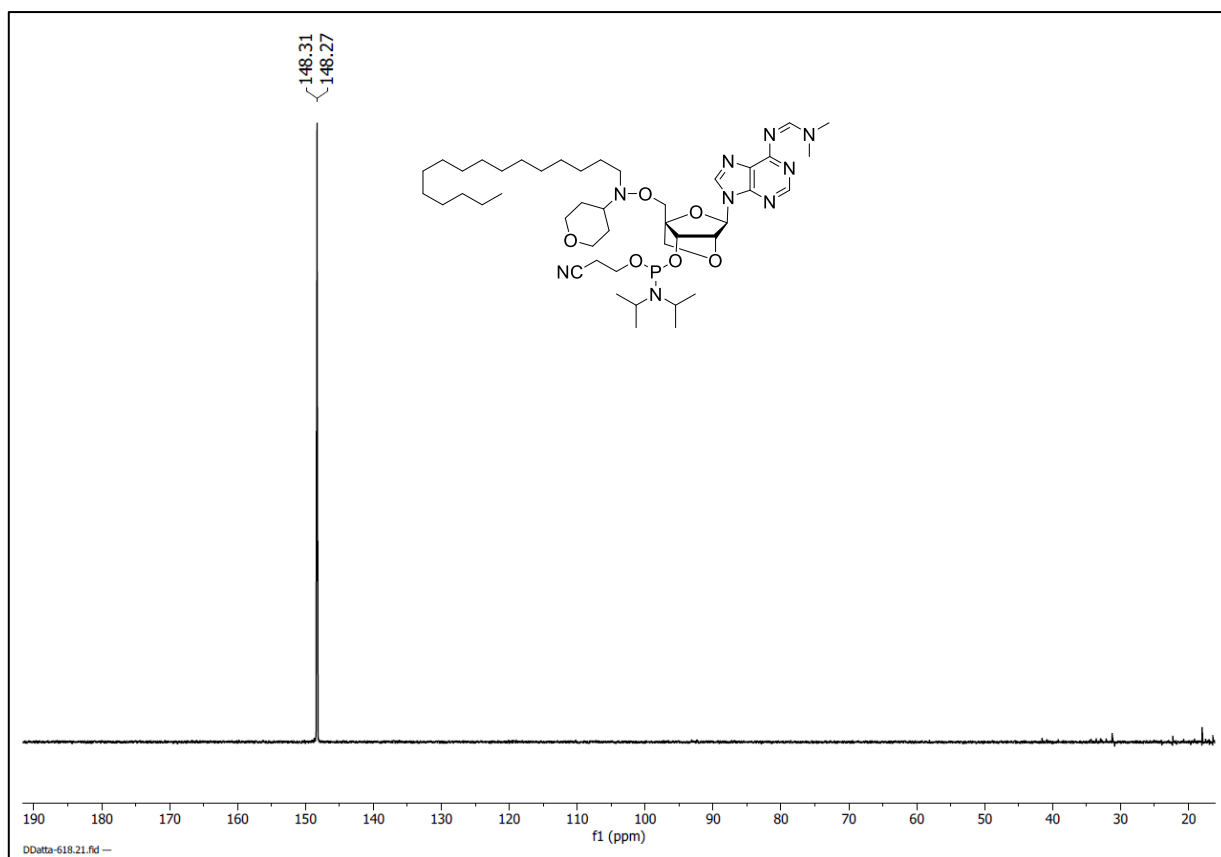

$^{31}\text{P}$  NMR of compound **33** (243 MHz,  $\text{CD}_3\text{CN}$ )

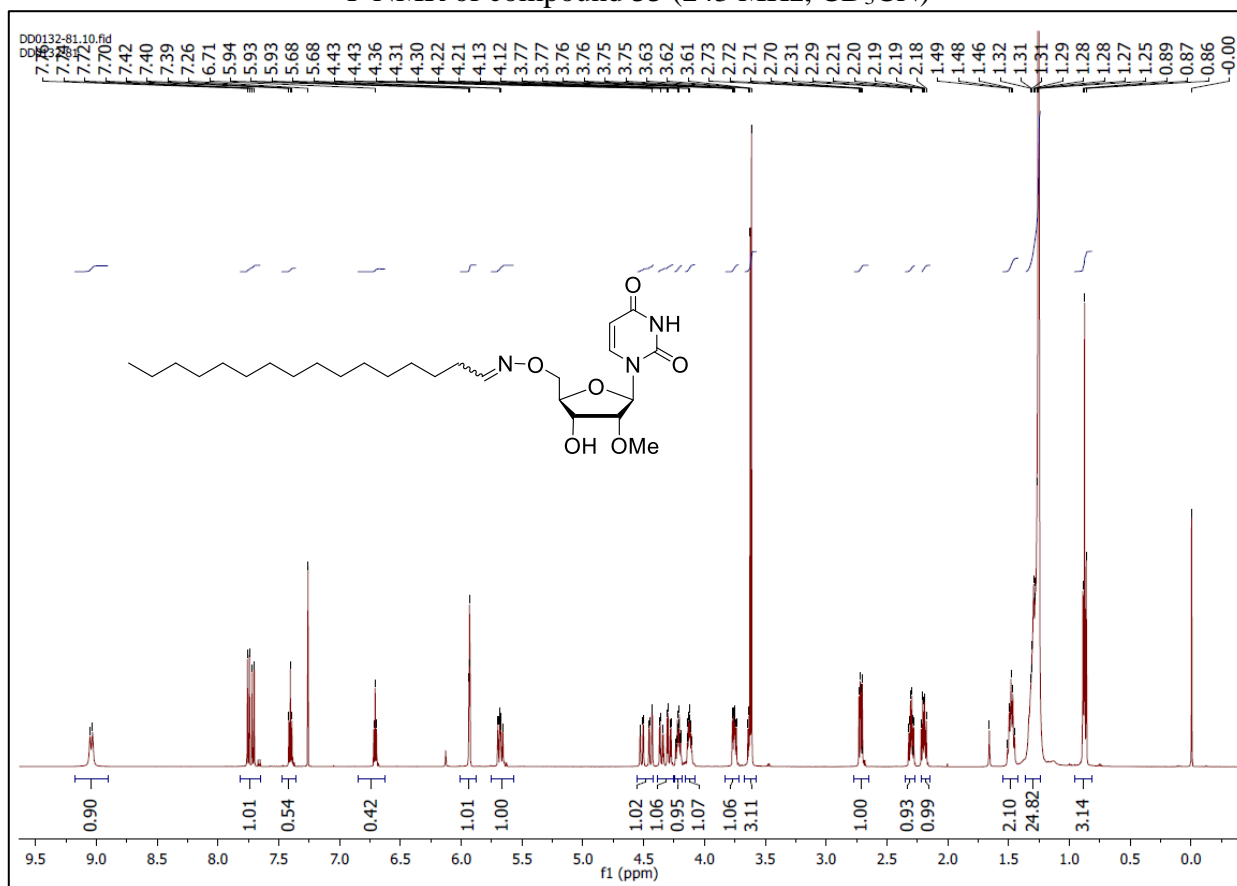

$^1\text{H}$  NMR of compound **34** (500 MHz,  $\text{CDCl}_3$ )

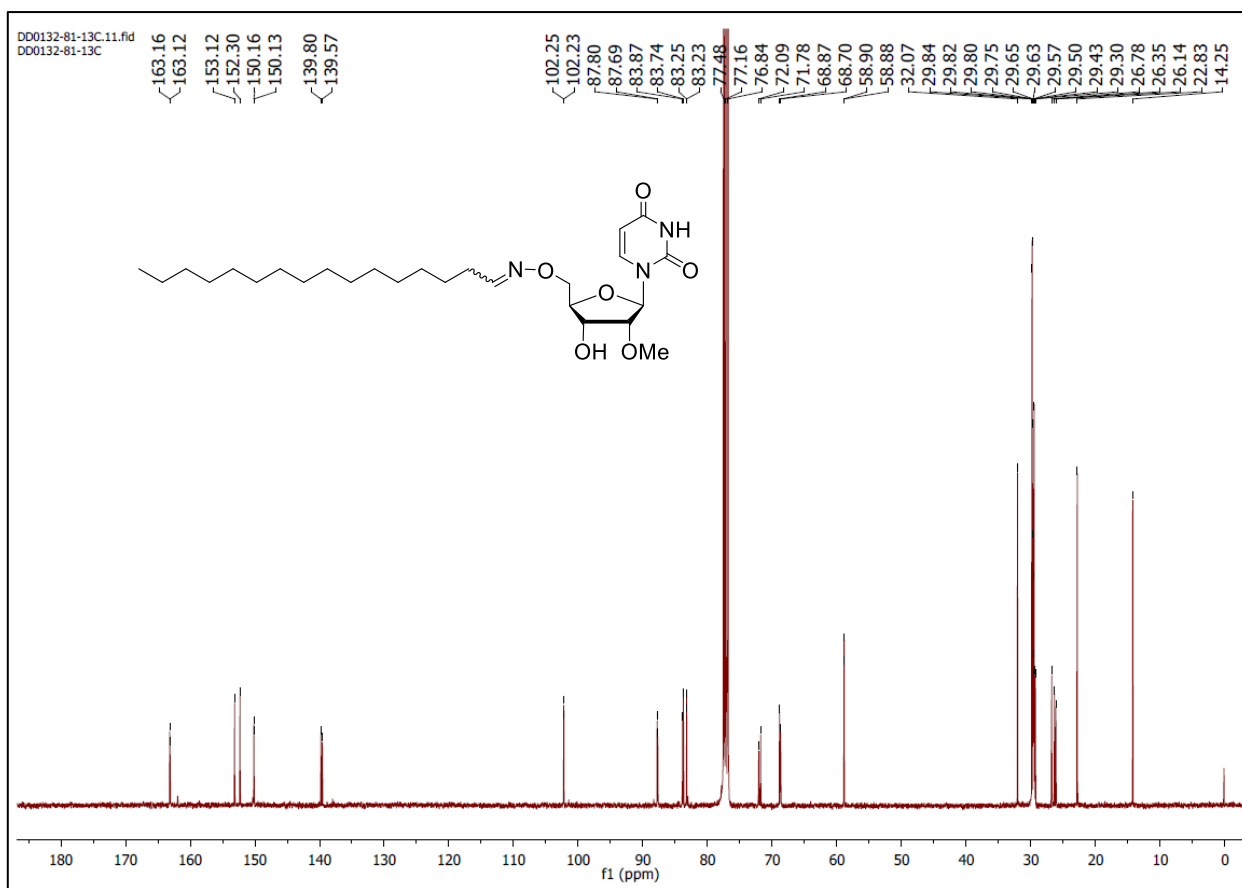

$^{13}\text{C}$  NMR of compound 34 (101 MHz,  $\text{CDCl}_3$ )

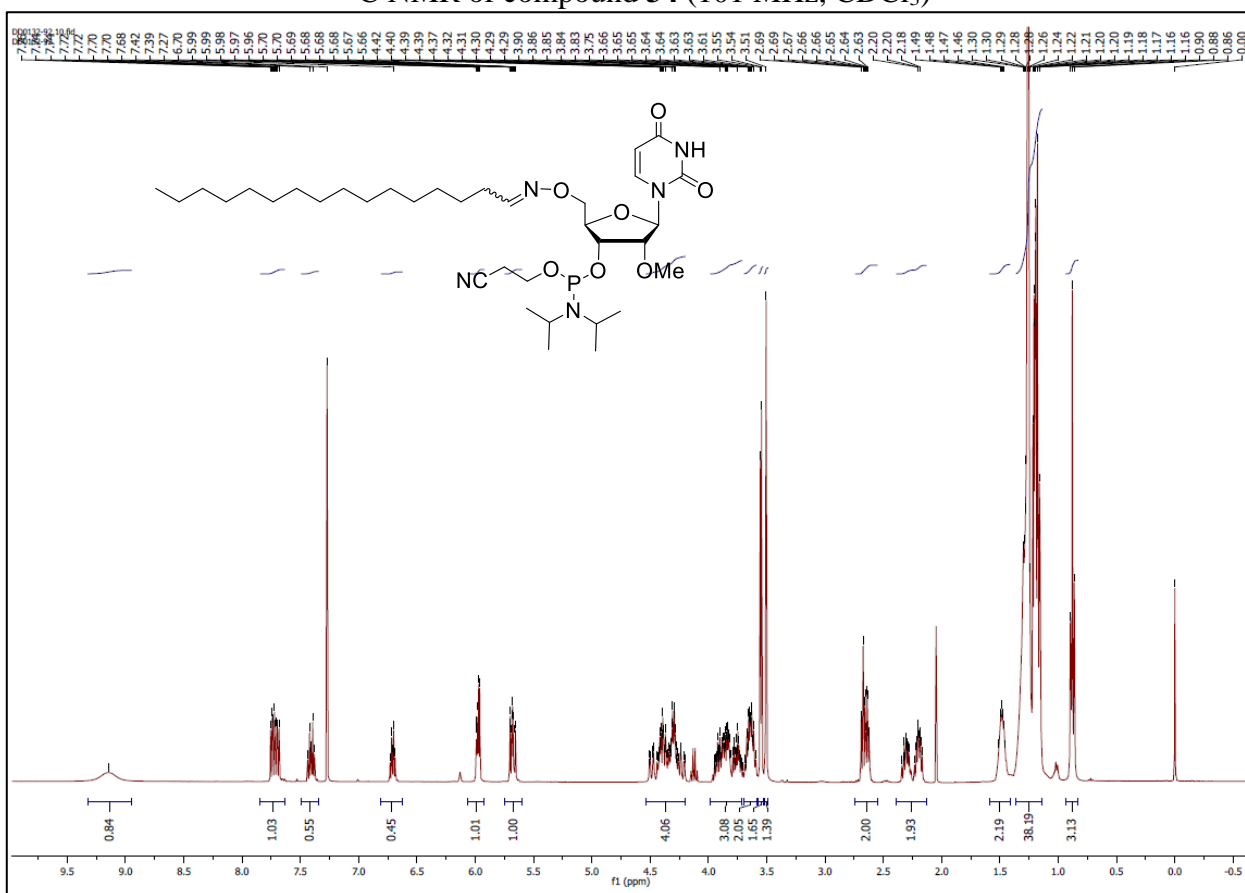

$^1\text{H}$  NMR of compound 35 (400 MHz,  $\text{CDCl}_3$ )

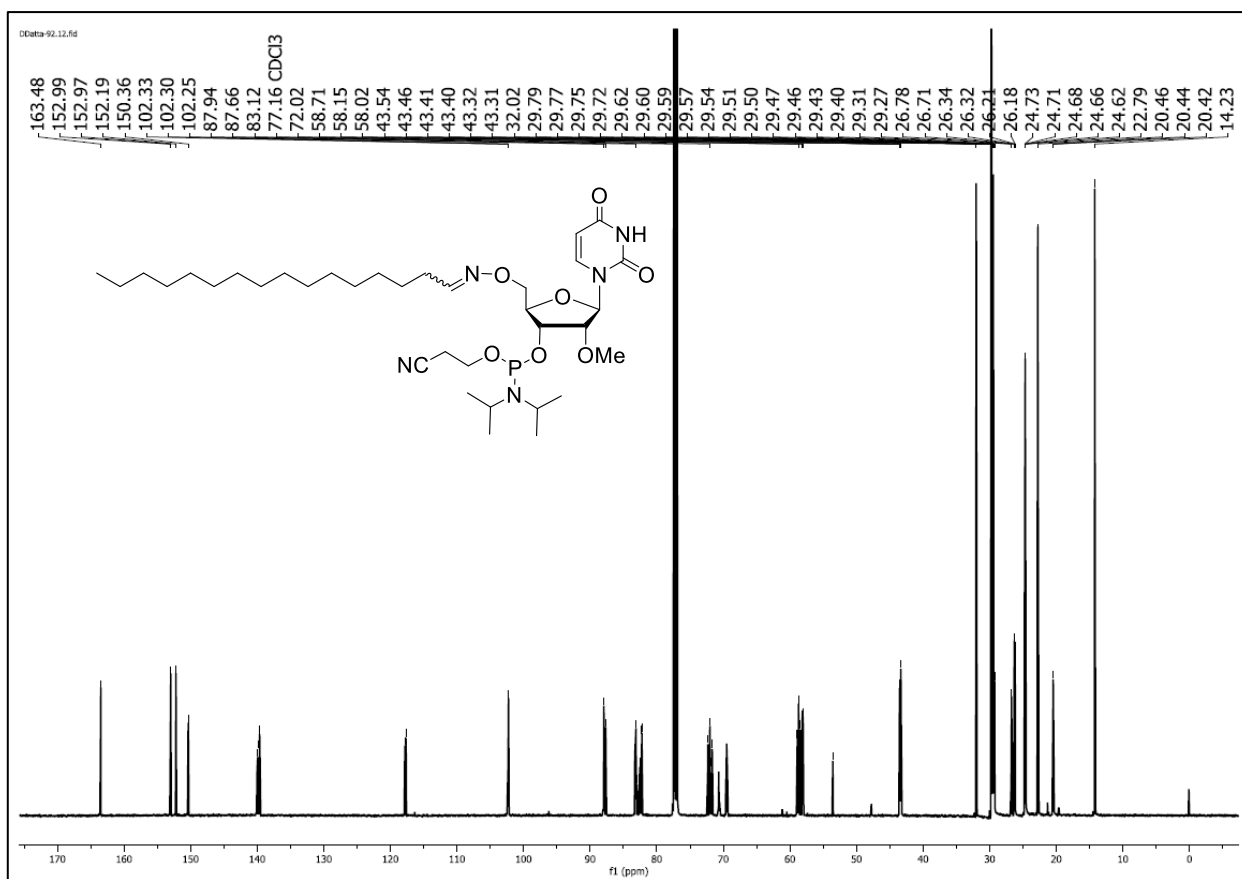

<sup>13</sup>C NMR of compound **35** (151 MHz, CDCl<sub>3</sub>)

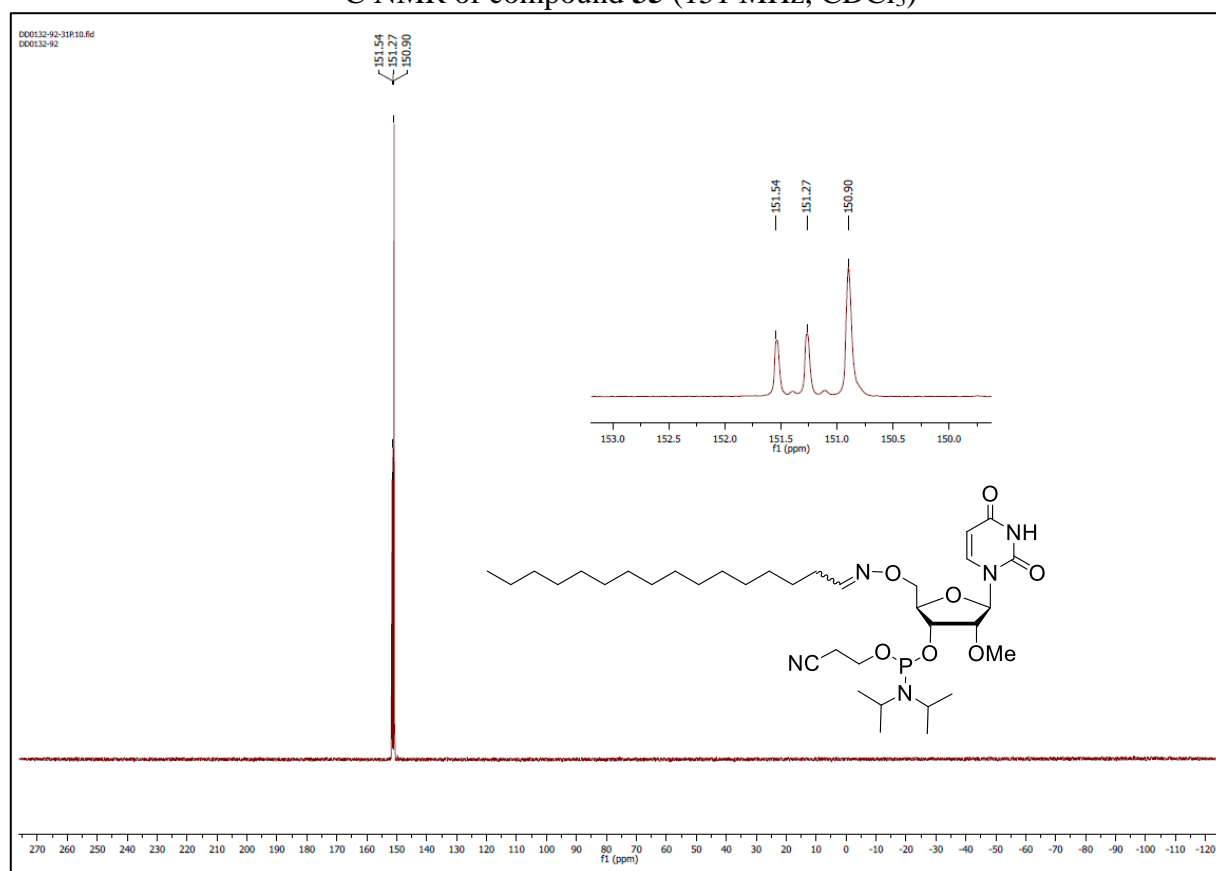

<sup>31</sup>P NMR of compound **35** (162 MHz, CDCl<sub>3</sub>)

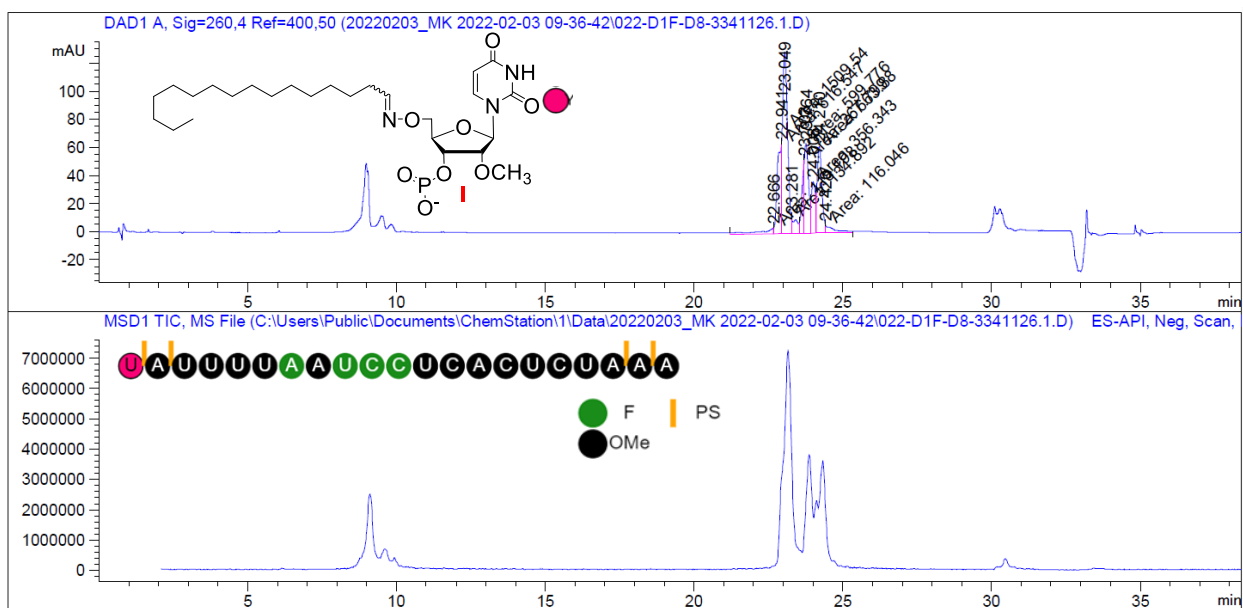

| Peak # | RetTime [min] | Type | Width [min] | Area [mAU*s] | Height [mAU] | Area %  |
|--------|---------------|------|-------------|--------------|--------------|---------|
| 1      | 22.666        | MF   | 0.4995      | 118.19809    | 3.94391      | 2.6967  |
| 2      | 22.941        | FM   | 0.1617      | 616.54657    | 63.56105     | 14.0667 |
| 3      | 23.049        | FM   | 0.1947      | 1509.54004   | 129.20488    | 34.4406 |
| 4      | 23.281        | FM   | 0.2179      | 134.89249    | 10.31874     | 3.0776  |
| 5      | 23.703        | MF   | 0.0861      | 267.79868    | 51.85812     | 6.1099  |
| 6      | 23.764        | FM   | 0.1566      | 599.77600    | 63.83652     | 13.6841 |
| 7      | 24.008        | FM   | 0.1631      | 356.34317    | 36.40572     | 8.1301  |
| 8      | 24.210        | FM   | 0.1793      | 663.87970    | 61.72602     | 15.1466 |
| 9      | 24.420        | FM   | 0.3491      | 116.04649    | 5.53993      | 2.6476  |

**FigureS4:** Reverse-phase HPLC profile for ON1

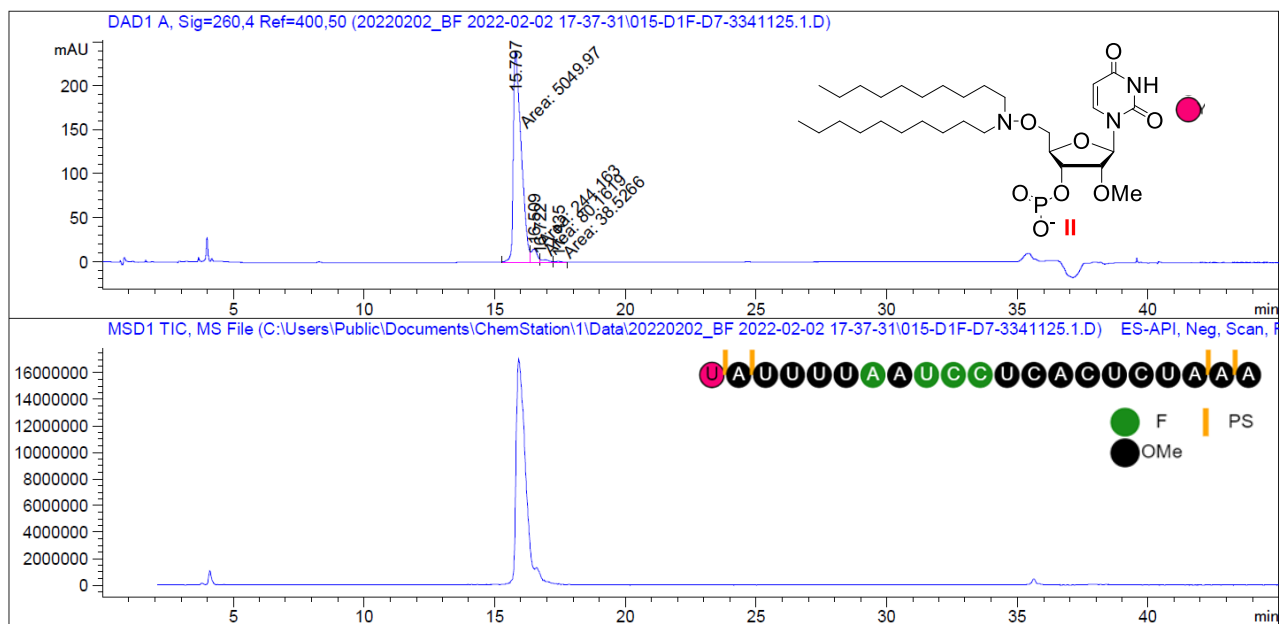

| Peak # | RetTime [min] | Type | Width [min] | Area [mAU*s] | Height [mAU] | Area %  |
|--------|---------------|------|-------------|--------------|--------------|---------|
| 1      | 15.797        | MF   | 0.3509      | 5049.97412   | 239.88747    | 93.2964 |
| 2      | 16.509        | MF   | 0.2623      | 244.16330    | 15.51295     | 4.5108  |
| 3      | 16.722        | MF   | 0.2240      | 80.16187     | 4.19234      | 1.4810  |
| 4      | 17.435        | FM   | 0.3822      | 38.52655     | 1.67991      | 0.7118  |

Figure S5: Reverse-phase HPLC profile for ON2

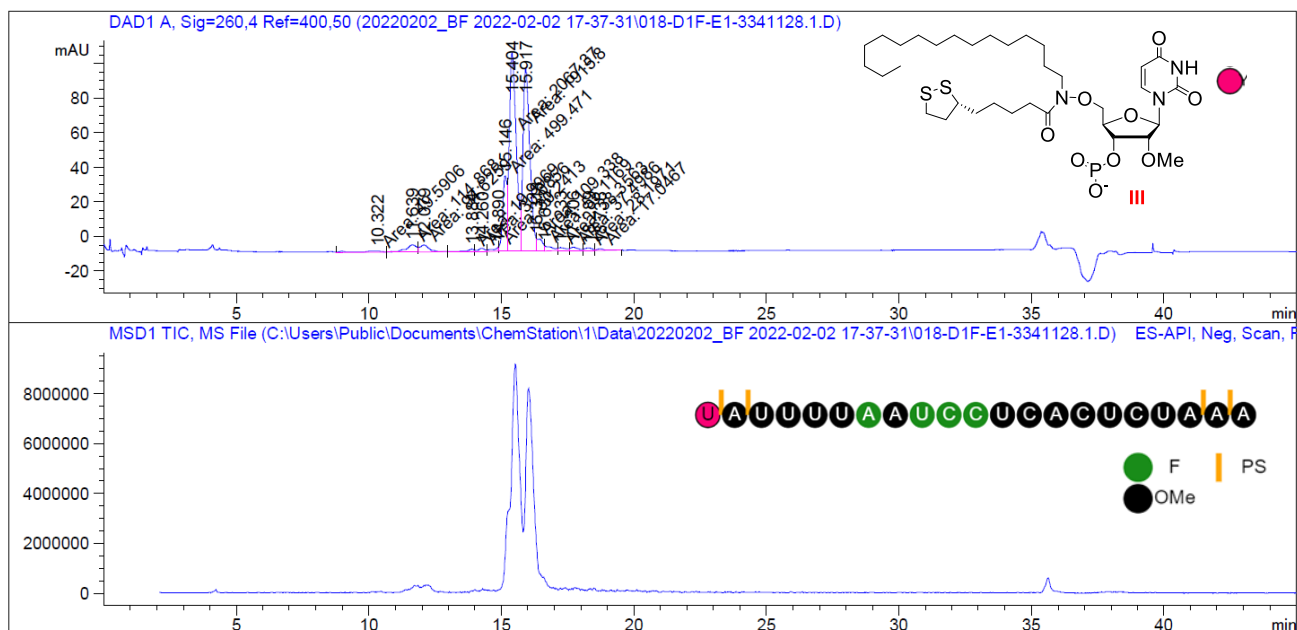

| Peak # | RetTime [min] | Type | Width [min] | Area [mAU*s] | Height [mAU] | Area %  |
|--------|---------------|------|-------------|--------------|--------------|---------|
| 6      | 14.890        | MF   | 0.2061      | 30.24129     | 2.44589      | 0.5921  |
| 7      | 15.146        | MF   | 0.1908      | 499.47083    | 43.62690     | 9.7790  |
| 8      | 15.404        | MF   | 0.3001      | 2067.36792   | 114.82887    | 40.4763 |
| 9      | 15.917        | FM   | 0.3017      | 1915.79810   | 105.84090    | 37.5088 |
| 10     | 16.318        | MF   | 0.2526      | 109.33765    | 7.21351      | 2.1407  |
| 11     | 16.632        | MF   | 0.2081      | 55.11687     | 3.09261      | 1.0791  |
| 12     | 17.233        | MF   | 0.3562      | 38.35630     | 1.79476      | 0.7510  |
| 13     | 17.706        | MF   | 0.3316      | 37.49855     | 1.88493      | 0.7342  |
| 14     | 18.289        | MF   | 0.3091      | 28.19712     | 1.52049      | 0.5521  |
| 15     | 18.735        | FM   | 0.2886      | 17.04675     | 9.84512e-1   | 0.3338  |

**Figure S7:** Reverse-phase HPLC profile for ON3

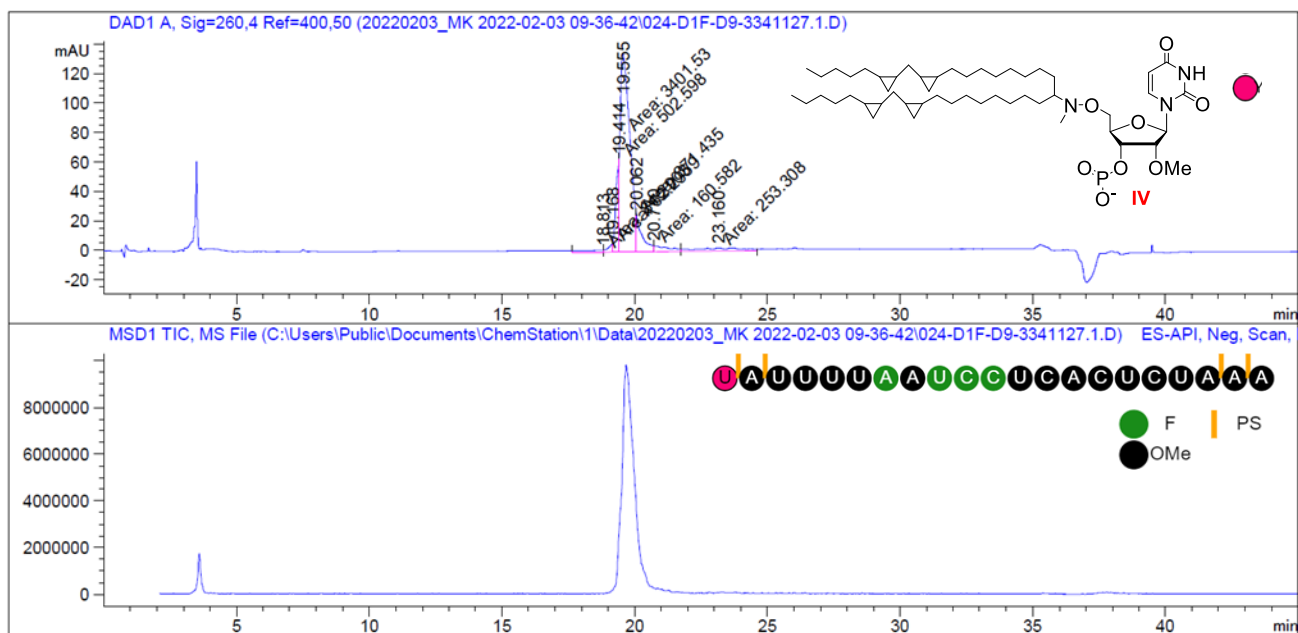

| Peak # | RetTime [min] | Type | Width [min] | Area [mAU*s] | Height [mAU] | Area %  |
|--------|---------------|------|-------------|--------------|--------------|---------|
| 1      | 18.813        | MF   | 0.9448      | 81.29025     | 1.43404      | 1.6820  |
| 2      | 19.168        | FM   | 0.1832      | 62.29589     | 5.66804      | 1.2890  |
| 3      | 19.414        | MF   | 0.1330      | 502.59784    | 62.98156     | 10.3992 |
| 4      | 19.555        | FM   | 0.4205      | 3401.52979   | 134.83406    | 70.3808 |
| 5      | 20.062        | FM   | 0.2434      | 371.43549    | 25.42860     | 7.6853  |

**Figure S6:** Reverse-phase HPLC profile for ON4

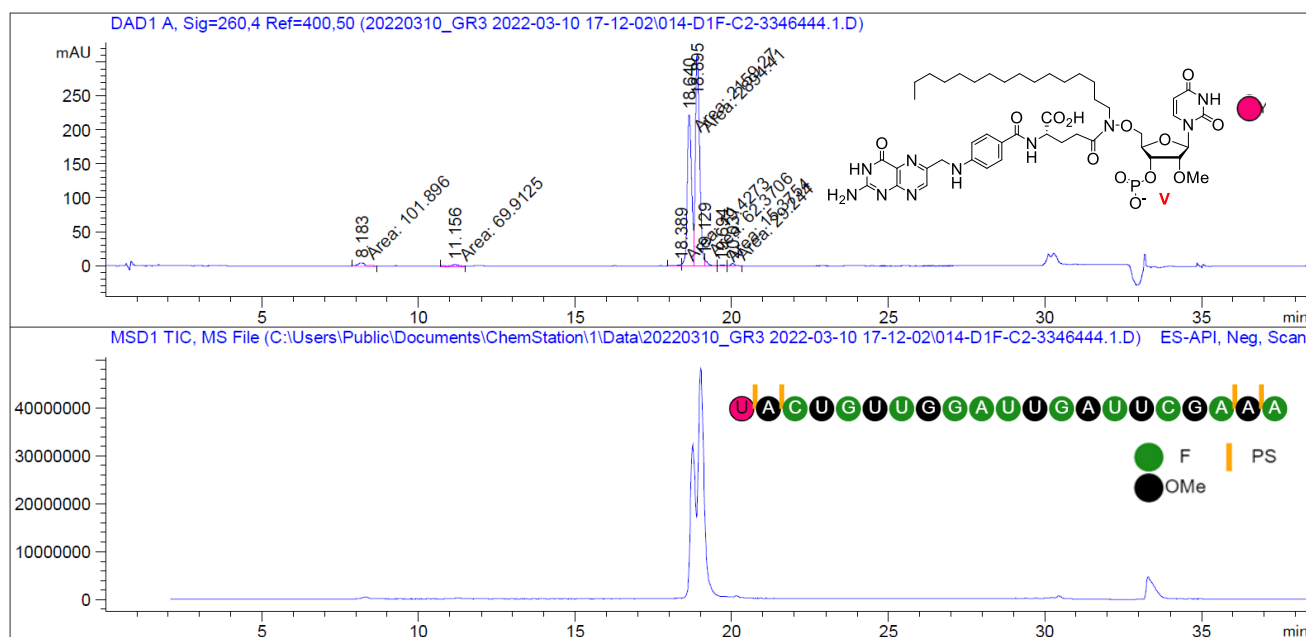

| Peak # | RetTime [min] | Type | Width [min] | Area [mAU*s] | Height [mAU] | Area %  |
|--------|---------------|------|-------------|--------------|--------------|---------|
| 1      | 8.183         | MM   | 0.3273      | 101.89648    | 5.18895      | 1.9039  |
| 2      | 11.156        | MM   | 0.4317      | 69.91247     | 2.69913      | 1.3063  |
| 3      | 18.389        | MF   | 0.1720      | 19.42729     | 1.88215      | 0.3630  |
| 4      | 18.640        | MF   | 0.1611      | 2159.26953   | 223.37918    | 40.3458 |
| 5      | 18.895        | FM   | 0.1545      | 2894.41040   | 312.23337    | 54.0819 |
| 6      | 19.129        | MF   | 0.0856      | 62.37064     | 8.90647      | 1.1654  |
| 7      | 19.694        | MF   | 0.2033      | 15.37537     | 1.26069      | 0.2873  |
| 8      | 20.037        | FM   | 0.1472      | 29.24400     | 3.31092      | 0.5464  |

**Figure S8:** Reverse-phase HPLC profile for ON5



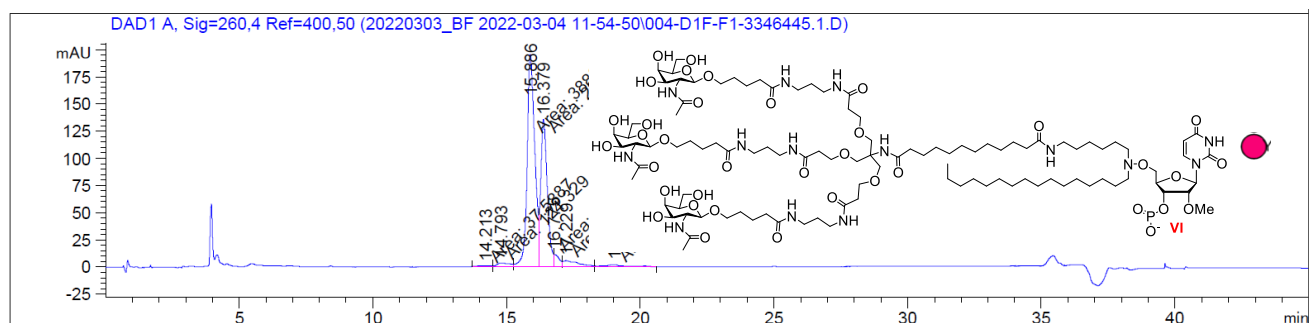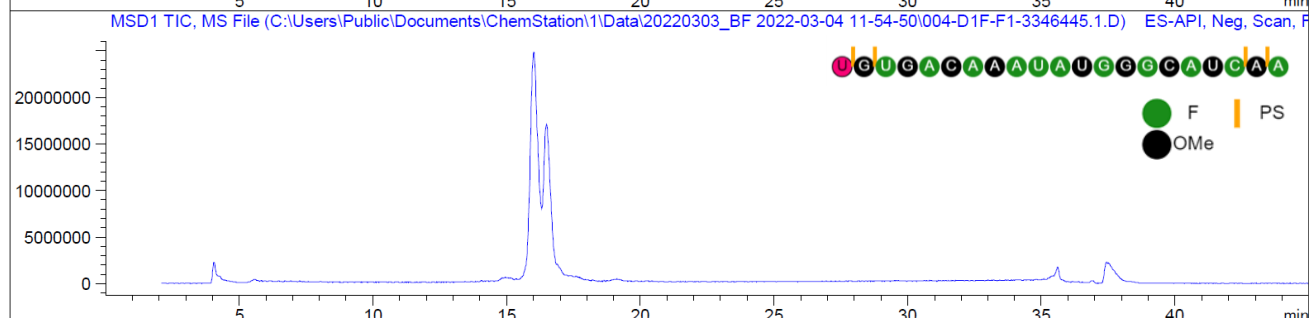

| Peak # | RetTime [min] | Type | Width [min] | Area [mAU*s] | Height [mAU] | Area %  |
|--------|---------------|------|-------------|--------------|--------------|---------|
| 1      | 14.213        | MF   | 0.5790      | 37.58873     | 1.08202      | 0.5469  |
| 2      | 14.793        | MF   | 0.5653      | 124.32880    | 3.66564      | 1.8089  |
| 3      | 15.886        | MF   | 0.3319      | 3889.23584   | 195.30348    | 56.5848 |
| 4      | 16.379        | FM   | 0.2844      | 2316.53760   | 135.75987    | 33.7035 |
| 5      | 16.775        | MF   | 0.1604      | 155.97365    | 11.39736     | 2.2693  |
| 6      | 17.229        | MF   | 0.6953      | 235.96304    | 5.65607      | 3.4330  |
| 7      | 19.039        | FM   | 0.8887      | 113.66112    | 2.13148      | 1.6537  |

**Figure S9:** Reverse-phase HPLC profile for ON6

## References

1. Gottlieb, H. E.; Kotlyar, V.; Nudelman, A., NMR Chemical Shifts of Common Laboratory Solvents as Trace Impurities. *The Journal of Organic Chemistry* **1997**, *62*, 7512-7515.
2. Guzaev, A. P.; Cook, P. D.; Manoharan, M.; Bhat, B. Preparation of nucleosidic and non-nucleosidic oligodeoxyribonucleotide-folate conjugates. US6335434B1, 2002.
3. Nair, J. K.; Willoughby, J. L. S.; Chan, A.; Charisse, K.; Alam, M. R.; Wang, Q.; Hoekstra, M.; Kandasamy, P.; Kel'in, A. V.; Milstein, S.; Taneja, N.; O'Shea, J.; Shaikh, S.; Zhang, L.; van der Sluis, R. J.; Jung, M. E.; Akinc, A.; Hutabarat, R.; Kuchimanchi, S.; Fitzgerald, K.; Zimmermann, T.; van Berkel, T. J. C.; Maier, M. A.; Rajeev, K. G.; Manoharan, M., Multivalent N-Acetylgalactosamine-Conjugated siRNA Localizes in Hepatocytes and Elicits Robust RNAi-Mediated Gene Silencing. *J. Am. Chem. Soc.* **2014**, *136*, 16958-16961.
4. Dai, Y.; Cai, X.; Bi, X.; Liu, C.; Yue, N.; Zhu, Y.; Zhou, J.; Fu, M.; Huang, W.; Qian, H., Synthesis and anti-cancer evaluation of folic acid-peptide- paclitaxel conjugates for addressing drug resistance. *European Journal of Medicinal Chemistry* **2019**, *171*, 104-115.
5. Manoharan, M.; Rajeev, K. G.; Yamada, T.; Butler, D.; Jayaprakash, K. N.; Jayaraman, M.; Matsuda, S.; Pandey, R. K.; Peng, C. G. Preparation of monomers and oligonucleotides comprising triazolyl cycloaddition adducts via click chemical for treating various disorders and diseases. US20120035115A1, 2012.
6. Witt, T.; Haeussler, M.; Kulpa, S.; Mecking, S., Chain Multiplication of Fatty Acids to Precise Telechelic Polyethylene. *Angew. Chem., Int. Ed.* **2017**, *56*, 7589-7594.
7. Iwasaki, T.; Tajimi, Y.; Kameda, K.; Kingwell, C.; Wcislo, W.; Osaka, K.; Yamawaki, M.; Morita, T.; Yoshimi, Y., Synthesis of 23-, 25-, 27-, and 29-Membered (Z)-Selective Unsaturated and Saturated Macrocyclic Lactones from 16- and 17-Membered Macrocyclic Lactones and Bromoalcohols by Wittig Reaction, Yamaguchi Macrolactonization, and Photoinduced Decarboxylative Radical Macrolactonization. *J. Org. Chem.* **2019**, *84*, 8019-8026.
8. Genet, J. P.; Kahn, P., A new synthesis of 14-tetradecanolide from cyclododecanone. *Tetrahedron Lett.* **1980**, *21*, 1521-4.
9. Clark, J. L.; Hollecker, L.; Mason, J. C.; Stuyver, L. J.; Tharnish, P. M.; Lostia, S.; McBrayer, T. R.; Schinazi, R. F.; Watanabe, K. A.; Otto, M. J.; Furman, P. A.; Stec, W. J.; Patterson, S. E.; Pankiewicz, K. W., Design, synthesis, and antiviral activity of 2'-deoxy-2'-fluoro-2'-C-methylcytidine, a potent inhibitor of hepatitis C virus replication. *J Med Chem* **2005**, *48*, 5504-8.
10. Parmar, R. G.; Brown, C. R.; Matsuda, S.; Willoughby, J. L. S.; Theile, C. S.; Charissé, K.; Foster, D. J.; Zlatev, I.; Jadhav, V.; Maier, M. A.; Egli, M.; Manoharan, M.; Rajeev, K. G., Facile Synthesis, Geometry, and 2'-Substituent-Dependent in Vivo Activity of 5'-(E)- and 5'-(Z)-Vinylphosphonate-Modified siRNA Conjugates. *Journal of Medicinal Chemistry* **2018**, *61*, 734-744.
